# Supplementary material for: Human Metabolome Reference Database in a Biracial Cohort across the Adult Lifespan
Source: Metabolites. 2023 Apr 25;13(5):591. doi: 10.3390/metabo13050591 (PMC10221446; doi:10.3390/metabo13050591)
Supplement: Supplementary file 1 [file metabolites-13-00591-s001.zip]

Archive with 5 entries (5 files):
- Supplementary Figure S1.pdf
- Supplementary Table S1. Descriptives of metabolites.xlsx
- Supplementary Table S2. Correlation with age for all metabolites.xlsx
- Supplementary Table S3. Sex differences for all metabolites.xlsx
- Supplementary Table S4. Racial differences for all metabolites.xlsx
