# Supplementary material for: Human Metabolome Reference Database in a Biracial Cohort across the Adult Lifespan
Source: Metabolites. 2023 Apr 25;13(5):591. doi: 10.3390/metabo13050591 (PMC10221446; doi:10.3390/metabo13050591)
Supplement: Supplementary file 1 [file metabolites-13-00591-s001.zip › Supplementary Table S1. Descriptives of metabolites.xlsx]

## Sheet: Black-female-20s
Quantitative metabolomics database (QMDB)
Selected matrix:	human plasma
Assay:	MxP® Quant 500
Age:	20 to 29
Gender:	f
Ethnicity:	Black or African American
Samples found matching the preferences	3
Short Name	Metabolite	Class	Median [µM]	Mean [µM]	Min [µM]	Max [µM]	1st quartile [µM]	3rd quartile [µM]	Interquartal range [µM]	Standard deviation	% of samples > LOD	Typical LOD [µM]	No of samples
C0	Carnitine	Acylcarnitines	38	35	25	42	25			8.8	100	1.5065	3
C2	Acetylcarnitine	Acylcarnitines	5.9	5.7	4.7	6.4	4.7			0.87	100	0.060515	3
C3	Propionylcarnitine	Acylcarnitines	0.25	0.23	0.18	0.27	0.18			0.048	100	0.098	3
C3-DC (C4-OH)	Malonylcarnitine (Hydroxybutyrylcarnitine)	Acylcarnitines	0.058	0.065	0.051	0.086	0.051			0.018	100	0.057	3
C3-OH	Hydroxypropionylcarnitine	Acylcarnitines									0	0.363	3
C3:1	Propenoylcarnitine	Acylcarnitines			0.029	0.029					33	0.0362	3
C4	Butyrylcarnitine	Acylcarnitines	0.1	0.11	0.088	0.13	0.088			0.021	100	0.0604	3
C4:1	Butenylcarnitine	Acylcarnitines									0	0.054	3
C5	Valerylcarnitine	Acylcarnitines	0.1	0.1	0.061	0.15	0.061			0.045	100	0.0504	3
C5-DC (C6-OH)	Glutarylcarnitine (Hydroxyhexanoylcarnitine)	Acylcarnitines									0	0.09628	3
C5-M-DC	Methylglutarylcarnitine	Acylcarnitines			0.043	0.043					33	0.06872	3
C5-OH (C3-DC-M)	Hydroxyvalerylcarnitine (Methylmalonylcarnitine)	Acylcarnitines	0.074	0.067	0.049	0.078	0.049			0.015	100	0.1	3
C5:1	Tiglylcarnitine	Acylcarnitines									0	0.04377	3
C5:1-DC	Glutaconylcarnitine	Acylcarnitines									0	0.0423541	3
C6 (C4:1-DC)	Hexanoylcarnitine (Fumarylcarnitine)	Acylcarnitines	0.039	0.044	0.033	0.061	0.033			0.015	100	0.153	3
C6:1	Hexenoylcarnitine	Acylcarnitines									0	0.09068	3
C7-DC	Pimelylcarnitine	Acylcarnitines	0.026	0.026	0.0056	0.047				0.029	67	0.060255	3
C8	Octanoylcarnitine	Acylcarnitines	0.043	0.058	0.027	0.1	0.027			0.04	100	0.223	3
C9	Nonanoylcarnitine	Acylcarnitines	0.038	0.038	0.038	0.038				0.0004	67	0.028	3
C10	Decanoylcarnitine	Acylcarnitines	0.12	0.15	0.091	0.22	0.091			0.069	100	0.1295	3
C10:1	Decenoylcarnitine	Acylcarnitines									0	0.4035	3
C10:2	Decadienoylcarnitine	Acylcarnitines			0.043	0.043					33	0.1085	3
C12	Dodecanoylcarnitine	Acylcarnitines	0.062	0.062	0.044	0.079				0.025	67	0.072	3
C12-DC	Dodecanedioylcarnitine	Acylcarnitines									0	1.019	3
C12:1	Dodecenoylcarnitine	Acylcarnitines									0	0.109	3
C14	Tetradecanoylcarnitine	Acylcarnitines									0	0.0599	3
C14:1	Tetradecenoylcarnitine	Acylcarnitines	0.053	0.055	0.047	0.065	0.047			0.0093	100	0.0349	3
C14:1-OH	Hydroxytetradecenoylcarnitine	Acylcarnitines			0.026	0.026					33	0.035385	3
C14:2	Tetradecadienoylcarnitine	Acylcarnitines	0.051	0.059	0.039	0.087	0.039			0.025	100	0.0322	3
C14:2-OH	Hydroxytetradecadienoylcarnitine	Acylcarnitines			0.012	0.012					33	0.031	3
C16	Hexadecanoylcarnitine	Acylcarnitines	0.086	0.075	0.05	0.089	0.05			0.022	100	0.088	3
C16-OH	Hydroxyhexadecanoylcarnitine	Acylcarnitines									0	0.077	3
C16:1	Hexadecenoylcarnitine	Acylcarnitines	0.032	0.037	0.025	0.054	0.025			0.015	100	0.05	3
C16:1-OH	Hydroxyhexadecenoylcarnitine	Acylcarnitines									0	0.039895	3
C16:2	Hexadecadienoylcarnitine	Acylcarnitines									0	0.02942	3
C16:2-OH	Hydroxyhexadecadienoylcarnitine	Acylcarnitines									0	0.041045	3
C18	Octadecanoylcarnitine	Acylcarnitines	0.029	0.028	0.021	0.035	0.021			0.0072	100	0.02201	3
C18:1	Octadecenoylcarnitine	Acylcarnitines	0.14	0.12	0.073	0.15	0.073			0.042	100	0.082855	3
C18:1-OH	Hydroxyoctadecenoylcarnitine	Acylcarnitines									0	0.0687	3
C18:2	Octadecadienoylcarnitine	Acylcarnitines	0.083	0.088	0.056	0.12	0.056			0.034	100	0.0347	3
Trigonelline	Trigonelline	Alkaloids	0.16	0.23	0.1	0.44	0.1			0.18	100	0.042595	3
TMAO	Trimethylamine N-oxide	Amine Oxides	2	2.1	1.5	2.8	1.5			0.64	100	0.108	3
1-Met-His	1-Methylhistidine	Amino Acid Related	3.4	3.6	3.3	3.9	3.3			0.34	100	0.01	3
3-Met-His	3-Methylhistidine	Amino Acid Related	4.3	5.6	2.6	9.9	2.6			3.8	100	0.01	3
5-AVA	5-Aminovaleric acid	Amino Acid Related	0.049	0.044	0.023	0.06	0.023			0.019	100	0.04	3
AABA	alpha-Aminobutyric acid	Amino Acid Related	15	17	11	25	11			7.1	100	0.435	3
Ac-Orn	Acetylornithine	Amino Acid Related			0.036	0.036					33	0.065	3
ADMA	Asymmetric dimethylarginine	Amino Acid Related	0.51	0.5	0.45	0.53	0.45			0.044	100	0.08	3
alpha-AAA	alpha-Aminoadipic acid	Amino Acid Related	0.56	0.56	0.35	0.77				0.3	67	0.3	3
Anserine	L-Anserine	Amino Acid Related									0	0.01	3
BABA	beta-Aminobutyric acid	Amino Acid Related									0	0.03	3
Betaine	Betaine	Amino Acid Related	28	24	9.4	35	9.4			13	100	0.2	3
c4-OH-Pro	cis-4-Hydroxyproline	Amino Acid Related									0	0.3	3
Carnosine	Carnosine	Amino Acid Related									0	0.2	3
Cit	Citrulline	Amino Acid Related	29	26	17	31	17			7.3	100	1	3
Creatinine	Creatinine	Amino Acid Related	55	56	47	67	47			10	100	3.85	3
Cystine	Cystine	Amino Acid Related	23	28	9.8	53	9.8			22	100	0.07489	3
DOPA	Dihydroxyphenylalanine	Amino Acid Related	0.037	0.039	0.034	0.045	0.034			0.0056	100	0.148	3
HArg	Homoarginine	Amino Acid Related	2.8	3.2	2.5	4.5	2.5			1.1	100	0.01	3
HCys	Homocysteine	Amino Acid Related	4.3	4.8	3.4	6.9	3.4			1.8	100	0.266	3
Kynurenine	Kynurenine	Amino Acid Related	1.5	1.4	1.3	1.5	1.3			0.14	100	0.2265	3
Met-SO	Methionine-Sulfoxide	Amino Acid Related	0.59	0.58	0.46	0.7	0.46			0.12	100	0.1	3
Nitro-Tyr	Nitrotyrosine	Amino Acid Related			0.11	0.11					33	0.3	3
Orn	Ornithine	Amino Acid Related	93	91	64	117	64			26	100	1	3
PAG	Phenylacetylglycine	Amino Acid Related									0	0.01	3
PheAlaBetaine	Phenylalanine betaine	Amino Acid Related	0.09	0.09	0.058	0.12				0.044	67	0.01	3
ProBetaine	Proline betaine	Amino Acid Related	4.7	5.2	4.5	6.4	4.5			1	100	0.061	3
Sarcosine	Sarcosine	Amino Acid Related	3.1	3.4	2	5	2			1.5	100	0.1855	3
SDMA	Symmetric dimethylarginine	Amino Acid Related	0.4	0.4	0.32	0.48	0.32			0.082	100	0.02	3
t4-OH-Pro	trans-4-Hydroxyproline	Amino Acid Related	12	16	7	30	7			12	100	0.382	3
Taurine	Taurine	Amino Acid Related	57	63	46	87	46			21	100	0.363	3
TrpBetaine	Tryptophan betaine	Amino Acid Related	0.96	0.98	0.17	1.8	0.17			0.82	100	0.00811	3
Ala	Alanine	Amino Acids	344	381	227	573	227			176	100	2.4075	3
Arg	Arginine	Amino Acids	80	75	63	81	63			10	100	0.987	3
Asn	Asparagine	Amino Acids	59	62	49	80	49			16	100	0.5225	3
Asp	Aspartic Acid	Amino Acids	3.3	4	3.1	5.6	3.1			1.4	100	1.0305	3
Cys	Cysteine	Amino Acids	50	49	37	61	37			12	100	0.1	3
Gln	Glutamine	Amino Acids	704	662	542	741	542			106	100	3.45	3
Glu	Glutamic Acid	Amino Acids	47	42	24	56	24			16	100	2.662	3
Gly	Glycine	Amino Acids	289	306	226	402	226			89	100	4.7	3
His	Histidine	Amino Acids	86	85	76	94	76			9	100	1.1	3
Ile	Isoleucine	Amino Acids	74	82	66	106	66			21	100	0.759	3
Leu	Leucine	Amino Acids	120	127	117	144	117			15	100	1.095	3
Lys	Lysine	Amino Acids	158	155	142	166	142			12	100	1.4	3
Met	Methionine	Amino Acids	30	30	27	34	27			3.4	100	0.8055	3
Phe	Phenylalanine	Amino Acids	51	53	46	63	46			9	100	0.8685	3
Pro	Proline	Amino Acids	203	210	184	241	184			29	100	2.07	3
Ser	Serine	Amino Acids	117	107	69	135	69			34	100	1.55	3
Thr	Threonine	Amino Acids	191	185	155	209	155			28	100	0.9225	3
Trp	Tryptophan	Amino Acids	58	61	54	72	54			9.2	100	0.792	3
Tyr	Tyrosine	Amino Acids	71	69	60	78	60			9.2	100	0.4925	3
Val	Valine	Amino Acids	212	213	196	232	196			18	100	1.048	3
CA	Cholic Acid	Bile Acids	0.083	0.064	0.024	0.086	0.024			0.035	100	0.003	3
CDCA	Chenodeoxycholic acid	Bile Acids	0.046	0.043	0.035	0.047	0.035			0.0062	100	0.02	3
DCA	Deoxycholic acid	Bile Acids	0.15	0.19	0.12	0.29	0.12			0.092	100	0.0081	3
GCA	Glycocholic acid	Bile Acids	0.43	0.4	0.34	0.44	0.34			0.053	100	0.00429	3
GCDCA	Glycochenodeoxycholic acid	Bile Acids	0.7	0.79	0.66	1	0.66			0.18	100	0.002	3
GDCA	Glycodeoxycholic acid	Bile Acids	0.47	0.55	0.36	0.83	0.36			0.24	100	0.0016736	3
GLCA	Glycolithocholic acid	Bile Acids			0.035	0.035					33	0.003565	3
GLCAS	Glycolithocholic acid sulfate	Bile Acids	0.36	0.42	0.35	0.54	0.35			0.11	100	0.0034	3
GUDCA	Glycoursodeoxycholic acid	Bile Acids	0.078	0.093	0.066	0.14	0.066			0.038	100	0.0019	3
TCA	Taurocholic acid	Bile Acids	0.05	0.061	0.046	0.088	0.046			0.023	100	0.005	3
TCDCA	Taurochenodeoxycholic acid	Bile Acids	0.17	0.15	0.09	0.18	0.09			0.049	100	0.004085	3
TDCA	Taurodeoxycholic acid	Bile Acids	0.094	0.11	0.04	0.21	0.04			0.084	100	0.004	3
TLCA	Taurolithocholic acid	Bile Acids	0.0028	0.0023	0.0012	0.003	0.0012			0.001	100	0.002	3
TMCA	Tauro-muricholic acids	Bile Acids	0.02	0.025	0.0074	0.046	0.0074			0.02	100	0.002	3
beta-Ala	beta-Alanine	Biogenic Amines	2.3	2.8	1.9	4.1	1.9			1.2	100	0.11	3
Dopamine	Dopamine	Biogenic Amines									0	0.2315	3
GABA	gamma-Aminobutyric acid	Biogenic Amines	0.17	0.18	0.14	0.22	0.14			0.04	100	0.04652	3
Histamine	Histamine	Biogenic Amines									0	0.429	3
PEA	Phenylethylamine	Biogenic Amines									0	0.001	3
Putrescine	Putrescine	Biogenic Amines	0.085	0.093	0.078	0.12	0.078			0.02	100	0.0624	3
Serotonin	Serotonin	Biogenic Amines	0.061	0.24	0.04	0.62	0.04			0.33	100	0.04	3
Spermidine	Spermidine	Biogenic Amines			0.18	0.18					33	0.2	3
Spermine	Spermine	Biogenic Amines			0.17	0.17					33	0.2	3
Hexose	Hexose	Carbohydrates and Related	4504	4201	3496	4604	3496			613	100	88.1885	3
AconAcid	Aconitic acid	Carboxylic Acids	8.2	8	7.7	8.2	7.7			0.29	100	0.2667	3
DiCA(12:0)	Dodecanedioic acid	Carboxylic Acids									0	0.1595	3
DiCA(14:0)	Tetradecanedioic acid	Carboxylic Acids									0	0.09969	3
HipAcid	Hippuric acid	Carboxylic Acids	3.3	4.2	2.8	6.6	2.8			2.1	100	0.5	3
Lac	Lactic acid	Carboxylic Acids	4414	3992	2754	4810	2754			1091	100	143.401	3
OH-GlutAcid	Hydroxyglutaric acid	Carboxylic Acids									0	6.942	3
Suc	Succinic acid	Carboxylic Acids									0	20.851	3
Cer d16:1/18:0	Ceramide d16:1/18:0	Ceramides	0.067	0.066	0.026	0.1	0.026			0.039	100	0.025875	3
Cer d16:1/20:0	Ceramide d16:1/20:0	Ceramides	0.081	0.068	0.032	0.092	0.032			0.032	100	0.01891	3
Cer d16:1/22:0	Ceramide d16:1/22:0	Ceramides	0.2	0.21	0.17	0.28	0.17			0.057	100	0.0694	3
Cer d16:1/23:0	Ceramide d16:1/23:0	Ceramides	0.12	0.1	0.051	0.14	0.051			0.044	100	0.033	3
Cer d16:1/24:0	Ceramide d16:1/24:0	Ceramides	0.13	0.15	0.098	0.24	0.098			0.072	100	0.01336	3
Cer d18:1/14:0	Ceramide d18:1/14:0	Ceramides	0.096	0.091	0.073	0.1	0.073			0.016	100	0.04241	3
Cer d18:1/16:0	Ceramide d18:1/16:0	Ceramides	0.46	0.47	0.44	0.5	0.44			0.03	100	0.011415	3
Cer d18:1/18:0	Ceramide d18:1/18:0	Ceramides	0.16	0.14	0.1	0.17	0.1			0.035	100	0.00978	3
Cer d18:1/18:0-OH	Ceramide d18:1/18:0-OH	Ceramides			0.33	0.33					33	0.2945	3
Cer d18:1/18:1	Ceramide d18:1/18:1	Ceramides	0.028	0.03	0.025	0.037	0.025			0.0063	100	0.0271351	3
Cer d18:1/20:0	Ceramide d18:1/20:0	Ceramides	0.094	0.11	0.091	0.13	0.091			0.023	100	0.007175	3
Cer d18:1/20:0-OH	Ceramide d18:1/20:0-OH	Ceramides	0.28	0.3	0.23	0.4	0.23			0.087	100	0.239	3
Cer d18:1/22:0	Ceramide d18:1/22:0	Ceramides	0.65	0.74	0.65	0.92	0.65			0.16	100	0.010545	3
Cer d18:1/23:0	Ceramide d18:1/23:0	Ceramides	0.78	0.79	0.5	1.1	0.5			0.29	100	0.012515	3
Cer d18:1/24:0	Ceramide d18:1/24:0	Ceramides	1.8	2.2	1.8	2.9	1.8			0.64	100	0.02399	3
Cer d18:1/24:1	Ceramide d18:1/24:1	Ceramides	0.84	0.83	0.52	1.1	0.52			0.3	100	0.011975	3
Cer d18:1/25:0	Ceramide d18:1/25:0	Ceramides	0.44	0.38	0.24	0.45	0.24			0.12	100	0.066815	3
Cer d18:1/26:0	Ceramide d18:1/26:0	Ceramides	0.073	0.08	0.058	0.11	0.058			0.026	100	0.024	3
Cer d18:1/26:1	Ceramide d18:1/26:1	Ceramides	0.021	0.022	0.012	0.034	0.012			0.011	100	0.0119	3
Cer d18:2/14:0	Ceramide d18:2/14:0	Ceramides									0	0.01116	3
Cer d18:2/16:0	Ceramide d18:2/16:0	Ceramides	0.091	0.09	0.064	0.12	0.064			0.026	100	0.049	3
Cer d18:2/18:0	Ceramide d18:2/18:0	Ceramides	0.071	0.062	0.036	0.08	0.036			0.023	100	0.029	3
Cer d18:2/18:1	Ceramide d18:2/18:1	Ceramides									0	0.01462	3
Cer d18:2/20:0	Ceramide d18:2/20:0	Ceramides	0.061	0.056	0.034	0.072	0.034			0.019	100	0.025	3
Cer d18:2/22:0	Ceramide d18:2/22:0	Ceramides	0.18	0.21	0.18	0.25	0.18			0.039	100	0.011245	3
Cer d18:2/23:0	Ceramide d18:2/23:0	Ceramides	0.11	0.1	0.057	0.15	0.057			0.045	100	0.041	3
Cer d18:2/24:0	Ceramide d18:2/24:0	Ceramides	0.34	0.41	0.29	0.6	0.29			0.17	100	0.00689	3
Cer d18:2/24:1	Ceramide d18:2/24:1	Ceramides	0.15	0.15	0.085	0.21	0.085			0.064	100	0.005	3
CE 14:0	Cholesteryl ester 14:0	Cholesteryl Esters	9.5	10	7.7	13	7.7			2.9	100	0.3075	3
CE 14:1	Cholesteryl ester 14:1	Cholesteryl Esters	0.078	0.078	0.069	0.087	0.069			0.0091	100	0.144	3
CE 15:0	Cholesteryl ester 15:0	Cholesteryl Esters	3.3	3.5	2.8	4.3	2.8			0.77	100	1.39	3
CE 15:1	Cholesteryl ester 15:1	Cholesteryl Esters	0.59	0.64	0.49	0.83	0.49			0.18	100	0.507	3
CE 16:0	Cholesteryl ester 16:0	Cholesteryl Esters	142	147	138	162	138			13	100	0.938	3
CE 16:1	Cholesteryl ester 16:1	Cholesteryl Esters	33	49	31	83	31			29	100	9.92	3
CE 17:0	Cholesteryl ester 17:0	Cholesteryl Esters	4.1	3.8	3	4.2	3			0.65	100	1.25	3
CE 17:1	Cholesteryl ester 17:1	Cholesteryl Esters	2.5	2.6	1.9	3.4	1.9			0.76	100	1.06	3
CE 18:0	Cholesteryl ester 18:0	Cholesteryl Esters	9.4	9.5	8.2	11	8.2			1.4	100	0.29215	3
CE 18:1	Cholesteryl ester 18:1	Cholesteryl Esters	209	221	207	246	207			22	100	1.3125	3
CE 18:2	Cholesteryl ester 18:2	Cholesteryl Esters	1203	1160	945	1330	945			196	100	14.28	3
CE 18:3	Cholesteryl ester 18:3	Cholesteryl Esters	63	76	62	102	62			23	100	0.226	3
CE 20:0	Cholesteryl ester 20:0	Cholesteryl Esters	2.1	2.3	1.8	3	1.8			0.62	100	4.413	3
CE 20:1	Cholesteryl ester 20:1	Cholesteryl Esters	0.62	0.49	0.23	0.62	0.23			0.23	100	0.618	3
CE 20:3	Cholesteryl ester 20:3	Cholesteryl Esters	13	15	12	20	12			4.5	100	0.183	3
CE 20:4	Cholesteryl ester 20:4	Cholesteryl Esters	129	189	127	310	127			105	100	0.549	3
CE 20:5	Cholesteryl ester 20:5	Cholesteryl Esters	31	36	22	54	22			17	100	0.4255	3
CE 22:0	Cholesteryl ester 22:0	Cholesteryl Esters									0	0.108	3
CE 22:1	Cholesteryl ester 22:1	Cholesteryl Esters			0.089	0.089					33	0.147	3
CE 22:2	Cholesteryl ester 22:2	Cholesteryl Esters	0.039	0.039	0.034	0.044				0.0065	67	0.169	3
CE 22:5	Cholesteryl ester 22:5	Cholesteryl Esters	1.3	1.8	1.3	2.7	1.3			0.85	100	0.88	3
CE 22:6	Cholesteryl ester 22:6	Cholesteryl Esters	23	29	23	41	23			11	100	0.3	3
p-Cresol-SO4	p-Cresol sulfate	Cresols	19	33	15	65	15			28	100	0.01	3
DG 14:0_14:0	Diacylglyceride 14:0_14:0	Diglycerides			1.2	1.2					33	0.3475	3
DG 14:0_18:1	Diacylglyceride 14:0_18:1	Diglycerides									0	0.6975	3
DG 14:0_18:2	Diacylglyceride 14:0_18:2	Diglycerides	0.57	0.57	0.42	0.73				0.22	67	0.334	3
DG 14:0_20:0	Diacylglyceride 14:0_20:0	Diglycerides			0.0004	0.0004					33	0.0698	3
DG 14:1_18:1	Diacylglyceride 14:1_18:1	Diglycerides			0.13	0.13					33	0.09721	3
DG 14:1_20:2	Diacylglyceride 14:1_20:2	Diglycerides	0.011	0.6	0.0022	1.8	0.0022			1	100	0.1135	3
DG 16:0_16:0	Diacylglyceride 16:0_16:0	Diglycerides									0	23.3	3
DG 16:0_16:1	Diacylglyceride 16:0_16:1	Diglycerides									0	0.2565	3
DG 16:0_18:1	Diacylglyceride 16:0_18:1	Diglycerides	2	1.8	0.95	2.5	0.95			0.78	100	0.573	3
DG 16:0_18:2	Diacylglyceride 16:0_18:2	Diglycerides	1.7	1.4	0.77	1.7	0.77			0.54	100	0.48	3
DG 16:0_20:0	Diacylglyceride 16:0_20:0	Diglycerides									0	0.9455	3
DG 16:0_20:3	Diacylglyceride 16:0_20:3	Diglycerides									0	0.1155	3
DG 16:0_20:4	Diacylglyceride 16:0_20:4	Diglycerides			0.063	0.063					33	0.189	3
DG 16:1_18:0	Diacylglyceride 16:1_18:0	Diglycerides									0	0.125	3
DG 16:1_18:1	Diacylglyceride 16:1_18:1	Diglycerides	0.81	1.1	0.46	2.1	0.46			0.89	100	0.4415	3
DG 16:1_18:2	Diacylglyceride 16:1_18:2	Diglycerides	0.52	0.51	0.38	0.62	0.38			0.12	100	0.151	3
DG 16:1_20:0	Diacylglyceride 16:1_20:0	Diglycerides									0	0.234	3
DG 17:0_17:1	Diacylglyceride 17:0_17:1	Diglycerides									0	0.107	3
DG 17:0_18:1	Diacylglyceride 17:0_18:1	Diglycerides	0.54	0.49	0.33	0.61	0.33			0.14	100	0.188	3
DG 18:0_20:0	Diacylglyceride 18:0_20:0	Diglycerides			0.011	0.011					33	0.417	3
DG 18:0_20:4	Diacylglyceride 18:0_20:4	Diglycerides									0	0.1225	3
DG 18:1_18:1	Diacylglyceride 18:1_18:1	Diglycerides	1.4	2.1	1.1	3.7	1.1			1.5	100	0.516	3
DG 18:1_18:2	Diacylglyceride 18:1_18:2	Diglycerides	5.2	6	3.5	9.4	3.5			3.1	100	1.63	3
DG 18:1_18:3	Diacylglyceride 18:1_18:3	Diglycerides	0.39	0.39	0.39	0.39				0.0009	67	0.339	3
DG 18:1_18:4	Diacylglyceride 18:1_18:4	Diglycerides									0	0.17015	3
DG 18:1_20:0	Diacylglyceride 18:1_20:0	Diglycerides			0.23	0.23					33	0.271	3
DG 18:1_20:1	Diacylglyceride 18:1_20:1	Diglycerides			0.032	0.032					33	0.0322042	3
DG 18:1_20:2	Diacylglyceride 18:1_20:2	Diglycerides			0.3	0.3					33	0.119	3
DG 18:1_20:3	Diacylglyceride 18:1_20:3	Diglycerides	0.086	0.086	0.064	0.11				0.03	67	0.07755	3
DG 18:1_20:4	Diacylglyceride 18:1_20:4	Diglycerides									0	0.185	3
DG 18:1_22:5	Diacylglyceride 18:1_22:5	Diglycerides									0	0.0133982	3
DG 18:1_22:6	Diacylglyceride 18:1_22:6	Diglycerides			0.11	0.11					33	0.29595	3
DG 18:2_18:2	Diacylglyceride 18:2_18:2	Diglycerides	5	4.3	2.5	5.4	2.5			1.6	100	0.605	3
DG 18:2_18:3	Diacylglyceride 18:2_18:3	Diglycerides	0.48	0.48	0.37	0.58				0.15	67	0.152	3
DG 18:2_18:4	Diacylglyceride 18:2_18:4	Diglycerides									0	0.1419	3
DG 18:2_20:0	Diacylglyceride 18:2_20:0	Diglycerides	0.22	0.22	0.16	0.29				0.087	67	0.122	3
DG 18:2_20:4	Diacylglyceride 18:2_20:4	Diglycerides									0	0.1805	3
DG 18:3_18:3	Diacylglyceride 18:3_18:3	Diglycerides									0	0.1605	3
DG 18:3_20:2	Diacylglyceride 18:3_20:2	Diglycerides									0	0.176	3
DG 21:0_22:6	Diacylglyceride 21:0_22:6	Diglycerides									0	0.407	3
DG 22:1_22:2	Diacylglyceride 22:1_22:2	Diglycerides			0.0012	0.0012					33	0.1235	3
DG O-14:0_18:2	Diacylglyceride O-14:0_18:2	Diglycerides									0	0.804	3
DG O-16:0_18:1	Diacylglyceride O-16:0_18:1	Diglycerides									0	0.1255	3
DG O-18:2_18:2	Diacylglyceride O-18:2_18:2	Diglycerides									0	0.0461062	3
Hex2Cer d18:1/14:0	Dihexosylceramide d18:1/14:0	Dihexosylceramides	0.36	0.33	0.25	0.38	0.25			0.07	100	0.0829	3
Hex2Cer d18:1/16:0	Dihexosylceramide d18:1/16:0	Dihexosylceramides	3	2.9	2.6	3.2	2.6			0.3	100	0.0259557	3
Hex2Cer d18:1/18:0	Dihexosylceramide d18:1/18:0	Dihexosylceramides	0.22	0.23	0.19	0.28	0.19			0.048	100	0.01082	3
Hex2Cer d18:1/20:0	Dihexosylceramide d18:1/20:0	Dihexosylceramides	0.12	0.13	0.081	0.18	0.081			0.052	100	0.0339	3
Hex2Cer d18:1/22:0	Dihexosylceramide d18:1/22:0	Dihexosylceramides	0.27	0.29	0.24	0.36	0.24			0.063	100	0.105	3
Hex2Cer d18:1/24:0	Dihexosylceramide d18:1/24:0	Dihexosylceramides	0.24	0.24	0.18	0.31	0.18			0.065	100	0.077	3
Hex2Cer d18:1/24:1	Dihexosylceramide d18:1/24:1	Dihexosylceramides	0.41	0.42	0.38	0.47	0.38			0.046	100	0.133	3
Hex2Cer d18:1/26:0	Dihexosylceramide d18:1/26:0	Dihexosylceramides	0.013	0.013	0.0071	0.019	0.0071			0.0061	100	0.003615	3
Hex2Cer d18:1/26:1	Dihexosylceramide d18:1/26:1	Dihexosylceramides	0.013	0.02	0.0071	0.04	0.0071			0.017	100	0.006	3
Cer d18:0/18:0	Dihydroceramide d18:0/18:0	Dihydroceramides	0.021	0.022	0.017	0.029	0.017			0.0059	100	0.00583	3
Cer d18:0/18:0-OH	Dihydroceramide d18:0/18:0-OH	Dihydroceramides									0	0.606	3
Cer d18:0/20:0	Dihydroceramide d18:0/20:0	Dihydroceramides	0.0014	0.0014	0.0014	0.0015				0.0001	67	0.03455	3
Cer d18:0/22:0	Dihydroceramide d18:0/22:0	Dihydroceramides	0.2	0.21	0.2	0.22	0.2			0.012	100	0.07019	3
Cer d18:0/24:0	Dihydroceramide d18:0/24:0	Dihydroceramides	0.28	0.28	0.22	0.35	0.22			0.063	100	0.097	3
Cer d18:0/24:1	Dihydroceramide d18:0/24:1	Dihydroceramides	0.16	0.17	0.14	0.2	0.14			0.031	100	0.093	3
Cer d18:0/26:1	Dihydroceramide d18:0/26:1	Dihydroceramides			0.027	0.027					33	0.035385	3
Cer d18:0/26:1-OH	Dihydroceramide d18:0/26:1-OH	Dihydroceramides			0.42	0.42					33	0.402	3
FA 12:0	Dodecanoic acid	Fatty Acids									0	16.493	3
FA 14:0	Myristic acid	Fatty Acids									0	228.567	3
FA 16:0	Palmitic acid	Fatty Acids									0	738.192	3
FA 18:0	Stearic acid	Fatty Acids									0	690.389	3
FA 18:1	Octadecenoic acid	Fatty Acids	186	206	110	322	110			108	100	64	3
FA 18:2	Octadecadienoic acid	Fatty Acids	61	63	54	75	54			10	100	3.4155	3
FA 20:1	Eicosenoic acid	Fatty Acids	1.8	1.9	1.3	2.5	1.3			0.64	100	0.515	3
FA 20:2	Eicosadienoic acid	Fatty Acids	1.6	1.9	1.4	2.6	1.4			0.66	100	0.6955	3
FA 20:3	Eicosatrienoic acid	Fatty Acids	0.72	0.74	0.55	0.95	0.55			0.2	100	0.25	3
FA 20:4	Arachidonic acid	Fatty Acids	4.7	4.9	2.7	7.4	2.7			2.4	100	0.8	3
FA 20:5	Eicosapentaenoic acid	Fatty Acids	0.46	0.42	0.25	0.54	0.25			0.15	100	0.117	3
FA 22:6	Docosahexaenoic acid	Fatty Acids	8.8	8.6	7.3	9.6	7.3			1.2	100	1.681	3
Hex-Cer d16:1/20:0	Hexosylceramide d16:1/20:0	Hexosylceramides	0.04	0.036	0.017	0.053	0.017			0.018	100	0.0123	3
Hex-Cer d16:1/22:0	Hexosylceramide d16:1/22:0	Hexosylceramides	0.05	0.044	0.027	0.056	0.027			0.015	100	0.017	3
Hex-Cer d16:1/24:0	Hexosylceramide d16:1/24:0	Hexosylceramides	0.044	0.036	0.018	0.047	0.018			0.016	100	0.0148	3
Hex-Cer d18:1/14:0	Hexosylceramide d18:1/14:0	Hexosylceramides	0.032	0.035	0.03	0.044	0.03			0.007	100	0.02585	3
Hex-Cer d18:1/16:0	Hexosylceramide d18:1/16:0	Hexosylceramides	1.1	1.2	1.1	1.3	1.1			0.14	100	0.0198	3
Hex-Cer d18:1/18:0	Hexosylceramide d18:1/18:0	Hexosylceramides	0.16	0.16	0.15	0.17	0.15			0.0061	100	0.0707	3
Hex-Cer d18:1/18:1	Hexosylceramide d18:1/18:1	Hexosylceramides	0.088	0.091	0.083	0.1	0.083			0.0094	100	0.0319	3
Hex-Cer d18:1/20:0	Hexosylceramide d18:1/20:0	Hexosylceramides	0.28	0.29	0.24	0.36	0.24			0.06	100	0.103	3
Hex-Cer d18:1/22:0	Hexosylceramide d18:1/22:0	Hexosylceramides	3	3.1	2.8	3.6	2.8			0.42	100	0.03776	3
Hex-Cer d18:1/23:0	Hexosylceramide d18:1/23:0	Hexosylceramides	1.8	1.7	1.1	2.1	1.1			0.5	100	0.03923	3
Hex-Cer d18:1/24:0	Hexosylceramide d18:1/24:0	Hexosylceramides	1.8	1.7	1.6	1.8	1.6			0.098	100	0.023905	3
Hex-Cer d18:1/24:1	Hexosylceramide d18:1/24:1	Hexosylceramides	4	3.8	3.5	4.1	3.5			0.33	100	0.1495	3
Hex-Cer d18:1/26:0	Hexosylceramide d18:1/26:0	Hexosylceramides	0.069	0.074	0.053	0.1	0.053			0.025	100	0.03788	3
Hex-Cer d18:1/26:1	Hexosylceramide d18:1/26:1	Hexosylceramides	0.074	0.076	0.072	0.083	0.072			0.0057	100	0.050635	3
Hex-Cer d18:2/16:0	Hexosylceramide d18:2/16:0	Hexosylceramides	0.011	0.012	0.0083	0.015	0.0083			0.0034	100	0.009915	3
Hex-Cer d18:2/18:0	Hexosylceramide d18:2/18:0	Hexosylceramides	0.022	0.024	0.021	0.028	0.021			0.0039	100	0.01368	3
Hex-Cer d18:2/20:0	Hexosylceramide d18:2/20:0	Hexosylceramides	0.016	0.016	0.012	0.019	0.012			0.0033	100	0.014665	3
Hex-Cer d18:2/22:0	Hexosylceramide d18:2/22:0	Hexosylceramides	0.54	0.48	0.36	0.55	0.36			0.1	100	0.176	3
Hex-Cer d18:2/23:0	Hexosylceramide d18:2/23:0	Hexosylceramides	0.38	0.31	0.16	0.4	0.16			0.14	100	0.0856	3
Hex-Cer d18:2/24:0	Hexosylceramide d18:2/24:0	Hexosylceramides	0.72	0.72	0.62	0.83				0.14	67	0.333	3
AbsAcid	Abscisic acid	Hormones and Related									0	0.01	3
Cortisol	Cortisol	Hormones and Related	0.21	0.25	0.19	0.34	0.19			0.08	100	0.05813	3
Cortisone	Cortisone	Hormones and Related	0.088	0.088	0.087	0.09				0.0023	67	0.06498	3
DHEAS	Dehydroepiandrosterone sulfate	Hormones and Related	2.1	2.5	1.9	3.5	1.9			0.88	100	0.0851258	3
3-IAA	Indoleacetic acid	Indoles and Derivatives	1.7	1.4	0.85	1.8	0.85			0.52	100	0.018	3
3-IPA	Indolepropionic acid	Indoles and Derivatives	1.4	1.2	0.14	2	0.14			0.94	100	0.0625	3
Indole	Indole	Indoles and Derivatives									0	78	3
Ind-SO4	Indoxyl sulfate	Indoles and Derivatives	2.5	2.9	1.4	4.8	1.4			1.8	100	0.0110957	3
LPC 14:0	Lysophosphatidylcholine 14:0	Lysophosphatidylcholines	7.2	8.2	5.3	12	5.3			3.4	100	12.1905	3
LPC 16:0	Lysophosphatidylcholine 16:0	Lysophosphatidylcholines	110	97	71	110	71			23	100	0.2525	3
LPC 16:1	Lysophosphatidylcholine 16:1	Lysophosphatidylcholines	2.8	3.5	2.2	5.4	2.2			1.7	100	0.079	3
LPC 17:0	Lysophosphatidylcholine 17:0	Lysophosphatidylcholines	1.7	1.7	1.5	1.9	1.5			0.2	100	0.04279	3
LPC 18:0	Lysophosphatidylcholine 18:0	Lysophosphatidylcholines	28	31	24	41	24			8.8	100	0.4095	3
LPC 18:1	Lysophosphatidylcholine 18:1	Lysophosphatidylcholines	26	24	12	34	12			11	100	0.142	3
LPC 18:2	Lysophosphatidylcholine 18:2	Lysophosphatidylcholines	59	60	22	98	22			38	100	0.214	3
LPC 20:3	Lysophosphatidylcholine 20:3	Lysophosphatidylcholines	2.5	2.7	1.3	4.3	1.3			1.5	100	0.156	3
LPC 20:4	Lysophosphatidylcholine 20:4	Lysophosphatidylcholines	8.1	7.7	5.8	9.3	5.8			1.8	100	0.058535	3
LPC 24:0	Lysophosphatidylcholine 24:0	Lysophosphatidylcholines	0.19	0.18	0.16	0.21	0.16			0.024	100	0.0727	3
LPC 26:0	Lysophosphatidylcholine 26:0	Lysophosphatidylcholines	0.19	0.18	0.13	0.23	0.13			0.05	100	0.0895	3
LPC 26:1	Lysophosphatidylcholine 26:1	Lysophosphatidylcholines	0.2	0.17	0.11	0.2	0.11			0.052	100	0.0619	3
Hypoxanthine	Hypoxanthine	Nucleobases and Related	4.2	4.2	1.6	6.8				3.6	67	0.495	3
Xanthine	Xanthine	Nucleobases and Related									0	0.4	3
PC 24:0	Phosphatidylcholine 24:0	Phosphatidylcholines	0.081	0.081	0.067	0.094				0.02	67	0.03922	3
PC 26:0	Phosphatidylcholine 26:0	Phosphatidylcholines									0	0.8725	3
PC 28:1	Phosphatidylcholine 28:1	Phosphatidylcholines	3.4	3.2	2.5	3.9	2.5			0.72	100	0.03336	3
PC 30:0	Phosphatidylcholine 30:0	Phosphatidylcholines	4.4	4.4	2.7	6.2	2.7			1.8	100	0.122	3
PC 32:0	Phosphatidylcholine 32:0	Phosphatidylcholines	13	13	9.2	17	9.2			4.1	100	0.02949	3
PC 32:1	Phosphatidylcholine 32:1	Phosphatidylcholines	14	19	6.3	36	6.3			15	100	0.0151042	3
PC 32:2	Phosphatidylcholine 32:2	Phosphatidylcholines	4	5	2.5	8.5	2.5			3.2	100	0.48	3
PC 32:3	Phosphatidylcholine 32:3	Phosphatidylcholines	0.75	0.75	0.48	1	0.48			0.27	100	0.00633	3
PC 34:1	Phosphatidylcholine 34:1	Phosphatidylcholines	171	177	98	263	98			82	100	0.096345	3
PC 34:2	Phosphatidylcholine 34:2	Phosphatidylcholines	420	425	280	576	280			148	100	0.174	3
PC 34:3	Phosphatidylcholine 34:3	Phosphatidylcholines	18	23	18	32	18			8.1	100	0.061205	3
PC 34:4	Phosphatidylcholine 34:4	Phosphatidylcholines	2	2.2	1.3	3.1	1.3			0.88	100	0.0141726	3
PC 36:0	Phosphatidylcholine 36:0	Phosphatidylcholines	1.6	1.6	1.2	2	1.2			0.38	100	0.282	3
PC 36:1	Phosphatidylcholine 36:1	Phosphatidylcholines	45	41	32	46	32			8.1	100	0.04206	3
PC 36:2	Phosphatidylcholine 36:2	Phosphatidylcholines	240	233	182	275	182			47	100	0.1185	3
PC 36:3	Phosphatidylcholine 36:3	Phosphatidylcholines	119	115	75	152	75			38	100	0.05691	3
PC 36:4	Phosphatidylcholine 36:4	Phosphatidylcholines	185	171	133	196	133			33	100	0.083375	3
PC 36:5	Phosphatidylcholine 36:5	Phosphatidylcholines	11	17	10	29	10			11	100	0.027775	3
PC 36:6	Phosphatidylcholine 36:6	Phosphatidylcholines	0.74	0.85	0.56	1.3	0.56			0.36	100	0.00875	3
PC 38:0	Phosphatidylcholine 38:0	Phosphatidylcholines	2.2	2.5	2.1	3.1	2.1			0.58	100	0.97	3
PC 38:3	Phosphatidylcholine 38:3	Phosphatidylcholines	33	34	33	35	33			0.9	100	0.03304	3
PC 38:4	Phosphatidylcholine 38:4	Phosphatidylcholines	67	89	66	135	66			40	100	0.05754	3
PC 38:5	Phosphatidylcholine 38:5	Phosphatidylcholines	39	35	25	42	25			9.2	100	0.0385	3
PC 38:6	Phosphatidylcholine 38:6	Phosphatidylcholines	67	63	46	78	46			16	100	0.035	3
PC 40:1	Phosphatidylcholine 40:1	Phosphatidylcholines									0	0.4305	3
PC 40:2	Phosphatidylcholine 40:2	Phosphatidylcholines	0.29	0.29	0.22	0.35	0.22			0.064	100	0.016525	3
PC 40:3	Phosphatidylcholine 40:3	Phosphatidylcholines	0.4	0.41	0.4	0.43	0.4			0.018	100	0.19	3
PC 40:4	Phosphatidylcholine 40:4	Phosphatidylcholines	2.3	2.4	2	3	2			0.54	100	0.0192925	3
PC 40:5	Phosphatidylcholine 40:5	Phosphatidylcholines	5.7	5.8	4.2	7.4	4.2			1.6	100	0.033	3
PC 40:6	Phosphatidylcholine 40:6	Phosphatidylcholines	19	20	17	25	17			4.1	100	0.219	3
PC 42:0	Phosphatidylcholine 42:0	Phosphatidylcholines	0.45	0.44	0.4	0.48	0.4			0.038	100	0.0424	3
PC 42:1	Phosphatidylcholine 42:1	Phosphatidylcholines	0.28	0.27	0.24	0.29	0.24			0.023	100	0.01122	3
PC 42:2	Phosphatidylcholine 42:2	Phosphatidylcholines	0.21	0.23	0.19	0.3	0.19			0.061	100	0.119	3
PC 42:4	Phosphatidylcholine 42:4	Phosphatidylcholines	0.16	0.17	0.16	0.18	0.16			0.012	100	0.01136	3
PC 42:5	Phosphatidylcholine 42:5	Phosphatidylcholines	0.32	0.29	0.22	0.33	0.22			0.059	100	0.011	3
PC 42:6	Phosphatidylcholine 42:6	Phosphatidylcholines	0.44	0.42	0.36	0.47	0.36			0.056	100	0.17	3
PC O-28:0	Phosphatidylcholine O-28:0	Phosphatidylcholines	0.32	0.31	0.27	0.36	0.27			0.047	100	0.166	3
PC O-28:1	Phosphatidylcholine O-28:1	Phosphatidylcholines	0.36	0.35	0.24	0.44	0.24			0.1	100	0.13	3
PC O-30:0	Phosphatidylcholine O-30:0	Phosphatidylcholines	0.34	0.33	0.3	0.36	0.3			0.03	100	0.135	3
PC O-30:1	Phosphatidylcholine O-30:1	Phosphatidylcholines	0.35	0.35	0.31	0.38				0.049	67	0.033	3
PC O-30:2	Phosphatidylcholine O-30:2	Phosphatidylcholines	0.099	0.098	0.064	0.13	0.064			0.033	100	0.05	3
PC O-32:1	Phosphatidylcholine O-32:1	Phosphatidylcholines	3	2.9	2.4	3.3	2.4			0.42	100	0.00852	3
PC O-32:2	Phosphatidylcholine O-32:2	Phosphatidylcholines	0.78	0.8	0.63	0.99	0.63			0.18	100	0.026175	3
PC O-34:0	Phosphatidylcholine O-34:0	Phosphatidylcholines	1.2	1.3	1.1	1.7	1.1			0.3	100	0.015695	3
PC O-34:1	Phosphatidylcholine O-34:1	Phosphatidylcholines	8.2	8	6.5	9.3	6.5			1.4	100	0.01855	3
PC O-34:2	Phosphatidylcholine O-34:2	Phosphatidylcholines	12	11	9.2	12	9.2			1.5	100	0.017	3
PC O-34:3	Phosphatidylcholine O-34:3	Phosphatidylcholines	12	12	8.2	14	8.2			3	100	0.027135	3
PC O-36:0	Phosphatidylcholine O-36:0	Phosphatidylcholines	0.61	0.76	0.51	1.2	0.51			0.35	100	0.335	3
PC O-36:1	Phosphatidylcholine O-36:1	Phosphatidylcholines	7	6.8	5.5	7.8	5.5			1.2	100	2.82	3
PC O-36:2	Phosphatidylcholine O-36:2	Phosphatidylcholines	13	13	12	13	12			0.6	100	0.040903	3
PC O-36:3	Phosphatidylcholine O-36:3	Phosphatidylcholines	7.3	7.2	6.4	7.8	6.4			0.72	100	0.01898	3
PC O-36:4	Phosphatidylcholine O-36:4	Phosphatidylcholines	14	15	12	19	12			3.7	100	0.030305	3
PC O-36:5	Phosphatidylcholine O-36:5	Phosphatidylcholines	12	12	8	16	8			4	100	0.01406	3
PC O-38:0	Phosphatidylcholine O-38:0	Phosphatidylcholines	1.8	1.8	1.3	2.2	1.3			0.46	100	0.685	3
PC O-38:1	Phosphatidylcholine O-38:1	Phosphatidylcholines	0.12	0.12	0.097	0.15				0.04	67	0.0099198	3
PC O-38:2	Phosphatidylcholine O-38:2	Phosphatidylcholines	1.8	1.8	1.3	2.3	1.3			0.5	100	0.00937	3
PC O-38:3	Phosphatidylcholine O-38:3	Phosphatidylcholines	3.3	3.1	2.7	3.3	2.7			0.35	100	0.013125	3
PC O-38:4	Phosphatidylcholine O-38:4	Phosphatidylcholines	8.7	10	8	15	8			3.7	100	0.02148	3
PC O-38:5	Phosphatidylcholine O-38:5	Phosphatidylcholines	13	14	11	18	11			3.4	100	0.028935	3
PC O-38:6	Phosphatidylcholine O-38:6	Phosphatidylcholines	6.5	6.4	4.3	8.3	4.3			2	100	0.010565	3
PC O-40:1	Phosphatidylcholine O-40:1	Phosphatidylcholines	1.2	1.4	1.2	1.8	1.2			0.35	100	0.0110284	3
PC O-40:2	Phosphatidylcholine O-40:2	Phosphatidylcholines	1.5	1.6	1.1	2	1.1			0.45	100	0.017	3
PC O-40:3	Phosphatidylcholine O-40:3	Phosphatidylcholines	0.88	0.9	0.8	1	0.8			0.1	100	0.020575	3
PC O-40:4	Phosphatidylcholine O-40:4	Phosphatidylcholines	1.8	1.9	1.7	2.2	1.7			0.27	100	0.063	3
PC O-40:5	Phosphatidylcholine O-40:5	Phosphatidylcholines	2.8	2.6	2.1	3	2.1			0.45	100	0.014	3
PC O-40:6	Phosphatidylcholine O-40:6	Phosphatidylcholines	3.1	3.4	2.7	4.5	2.7			0.97	100	0.0194	3
PC O-42:0	Phosphatidylcholine O-42:0	Phosphatidylcholines									0	0.696	3
PC O-42:1	Phosphatidylcholine O-42:1	Phosphatidylcholines	0.35	0.33	0.3	0.35	0.3			0.026	100	0.08374	3
PC O-42:2	Phosphatidylcholine O-42:2	Phosphatidylcholines	0.45	0.44	0.44	0.45	0.44			0.0078	100	0.02857	3
PC O-42:3	Phosphatidylcholine O-42:3	Phosphatidylcholines	0.82	0.77	0.66	0.85	0.66			0.1	100	0.01807	3
PC O-42:4	Phosphatidylcholine O-42:4	Phosphatidylcholines	0.68	0.74	0.58	0.94	0.58			0.18	100	0.167	3
PC O-42:5	Phosphatidylcholine O-42:5	Phosphatidylcholines	1.5	1.5	1.5	1.5	1.5			0.031	100	0.673	3
PC O-44:3	Phosphatidylcholine O-44:3	Phosphatidylcholines	0.13	0.13	0.13	0.13	0.13			0.0009	100	0.06	3
PC O-44:4	Phosphatidylcholine O-44:4	Phosphatidylcholines	0.24	0.26	0.22	0.33	0.22			0.056	100	0.118	3
PC O-44:5	Phosphatidylcholine O-44:5	Phosphatidylcholines	0.97	1	0.91	1.1	0.91			0.11	100	0.072785	3
PC O-44:6	Phosphatidylcholine O-44:6	Phosphatidylcholines	1.1	1.1	0.83	1.2	0.83			0.2	100	0.07648	3
SM 33:1	Sphingomyelin 33:1	Sphingomyelins	4.5	4.7	3.2	6.3	3.2			1.6	100	0.02028	3
SM 34:1	Sphingomyelin 34:1	Sphingomyelins	92	94	87	104	87			8.5	100	0.08305	3
SM 34:2	Sphingomyelin 34:2	Sphingomyelins	13	13	10	15	10			2.5	100	0.032	3
SM 35:1	Sphingomyelin 35:1	Sphingomyelins	2.5	2.7	1.7	4	1.7			1.1	100	0.004	3
SM 36:1	Sphingomyelin 36:1	Sphingomyelins	19	18	13	22	13			4.7	100	0.0216186	3
SM 36:2	Sphingomyelin 36:2	Sphingomyelins	9.2	8.3	4.8	11	4.8			3.1	100	0.009	3
SM 38:3	Sphingomyelin 38:3	Sphingomyelins	0.42	0.34	0.19	0.43	0.19			0.14	100	0.005	3
SM 41:1	Sphingomyelin 41:1	Sphingomyelins	11	11	8.7	13	8.7			2.2	100	0.021	3
SM 41:2	Sphingomyelin 41:2	Sphingomyelins	7.7	7.2	4.4	9.5	4.4			2.6	100	0.009	3
SM 42:1	Sphingomyelin 42:1	Sphingomyelins	17	18	17	20	17			1.5	100	0.032	3
SM 42:2	Sphingomyelin 42:2	Sphingomyelins	34	32	26	35	26			4.9	100	0.031	3
SM 43:1	Sphingomyelin 43:1	Sphingomyelins	0.81	0.93	0.7	1.3	0.7			0.31	100	0.00719	3
SM 44:1	Sphingomyelin 44:1	Sphingomyelins	0.12	0.13	0.11	0.15	0.11			0.021	100	0.045	3
SM 44:2	Sphingomyelin 44:2	Sphingomyelins	0.23	0.24	0.22	0.27	0.22			0.027	100	0.0044	3
TG 14:0_32:2	Triacylglyceride 14:0_32:2	Triglycerides	0.79	0.88	0.24	1.6	0.24			0.69	100	0.159	3
TG 14:0_34:0	Triacylglyceride 14:0_34:0	Triglycerides	1.2	1.1	0.19	1.8	0.19			0.8	100	0.325	3
TG 14:0_34:1	Triacylglyceride 14:0_34:1	Triglycerides	9.8	8.1	2	12	2			5.4	100	0.629	3
TG 14:0_34:2	Triacylglyceride 14:0_34:2	Triglycerides	7.4	6.5	2	10	2			4.2	100	0.189	3
TG 14:0_34:3	Triacylglyceride 14:0_34:3	Triglycerides	1.8	1.7	0.75	2.5	0.75			0.88	100	0.216	3
TG 14:0_35:1	Triacylglyceride 14:0_35:1	Triglycerides	0.31	0.31	0.26	0.35				0.064	67	0.26075	3
TG 14:0_35:2	Triacylglyceride 14:0_35:2	Triglycerides	0.28	0.26	0.17	0.33	0.17			0.08	100	0.1175	3
TG 14:0_36:1	Triacylglyceride 14:0_36:1	Triglycerides	2.1	1.7	0.57	2.4	0.57			0.97	100	0.214	3
TG 14:0_36:2	Triacylglyceride 14:0_36:2	Triglycerides	8.4	9.5	3.7	16	3.7			6.4	100	1.075	3
TG 14:0_36:3	Triacylglyceride 14:0_36:3	Triglycerides	11	11	4.9	16	4.9			5.7	100	1.585	3
TG 14:0_36:4	Triacylglyceride 14:0_36:4	Triglycerides	5.8	4.8	2.2	6.3	2.2			2.3	100	0.108	3
TG 14:0_38:4	Triacylglyceride 14:0_38:4	Triglycerides	0.45	0.38	0.12	0.56	0.12			0.23	100	0.0715	3
TG 14:0_38:5	Triacylglyceride 14:0_38:5	Triglycerides	0.52	0.41	0.14	0.56	0.14			0.23	100	0.0981	3
TG 14:0_40:5	Triacylglyceride 14:0_40:5	Triglycerides	0.29	0.29	0.094	0.5	0.094			0.2	100	0.0470066	3
TG 16:0_28:1	Triacylglyceride 16:0_28:1	Triglycerides	0.5	1	0.14	2.4	0.14			1.2	100	0.225	3
TG 16:0_28:2	Triacylglyceride 16:0_28:2	Triglycerides	0.22	0.81	0.091	2.1	0.091			1.1	100	0.121	3
TG 16:0_30:2	Triacylglyceride 16:0_30:2	Triglycerides	0.95	1.2	0.36	2.4	0.36			1.1	100	0.177	3
TG 16:0_32:0	Triacylglyceride 16:0_32:0	Triglycerides	14	14	9.5	18				6	67	0.796	3
TG 16:0_32:1	Triacylglyceride 16:0_32:1	Triglycerides	16	15	3.7	25	3.7			11	100	0.473	3
TG 16:0_32:2	Triacylglyceride 16:0_32:2	Triglycerides	9	8.2	2.3	13	2.3			5.6	100	0.246	3
TG 16:0_32:3	Triacylglyceride 16:0_32:3	Triglycerides	1.7	1.7	0.5	3.1	0.5			1.3	100	0.08682	3
TG 16:0_33:1	Triacylglyceride 16:0_33:1	Triglycerides	1.8	1.4	0.5	1.9	0.5			0.78	100	0.441	3
TG 16:0_33:2	Triacylglyceride 16:0_33:2	Triglycerides	1.1	0.93	0.4	1.3	0.4			0.48	100	0.145	3
TG 16:0_34:0	Triacylglyceride 16:0_34:0	Triglycerides	9.8	7.7	1.3	12	1.3			5.6	100	0.701	3
TG 16:0_34:1	Triacylglyceride 16:0_34:1	Triglycerides	77	58	19	78	19			34	100	0.823	3
TG 16:0_34:2	Triacylglyceride 16:0_34:2	Triglycerides	71	57	24	75	24			28	100	0.491	3
TG 16:0_34:3	Triacylglyceride 16:0_34:3	Triglycerides	20	17	11	21	11			5.7	100	0.207	3
TG 16:0_34:4	Triacylglyceride 16:0_34:4	Triglycerides	2.3	2	1.1	2.6	1.1			0.8	100	0.332	3
TG 16:0_35:1	Triacylglyceride 16:0_35:1	Triglycerides	1.7	1.4	0.65	1.7	0.65			0.61	100	0.269	3
TG 16:0_35:2	Triacylglyceride 16:0_35:2	Triglycerides	2.4	2.3	1.2	3.3	1.2			1	100	0.166	3
TG 16:0_35:3	Triacylglyceride 16:0_35:3	Triglycerides	1.2	1.1	0.69	1.4	0.69			0.38	100	0.08668	3
TG 16:0_36:2	Triacylglyceride 16:0_36:2	Triglycerides	82	108	55	188	55			70	100	0.596	3
TG 16:0_36:3	Triacylglyceride 16:0_36:3	Triglycerides	113	132	78	204	78			65	100	0.508	3
TG 16:0_36:4	Triacylglyceride 16:0_36:4	Triglycerides	64	58	35	74	35			20	100	0.277	3
TG 16:0_36:5	Triacylglyceride 16:0_36:5	Triglycerides	8.7	8.8	4.9	13	4.9			4	100	0.088265	3
TG 16:0_36:6	Triacylglyceride 16:0_36:6	Triglycerides	0.81	0.86	0.44	1.3	0.44			0.46	100	0.185	3
TG 16:0_37:3	Triacylglyceride 16:0_37:3	Triglycerides	0.91	0.76	0.35	1	0.35			0.35	100	0.141	3
TG 16:0_38:1	Triacylglyceride 16:0_38:1	Triglycerides	0.93	0.74	0.28	1	0.28			0.4	100	0.186	3
TG 16:0_38:2	Triacylglyceride 16:0_38:2	Triglycerides	1.6	1.6	0.49	2.8	0.49			1.2	100	0.333	3
TG 16:0_38:3	Triacylglyceride 16:0_38:3	Triglycerides	2.1	2.3	0.87	4.1	0.87			1.6	100	0.655	3
TG 16:0_38:4	Triacylglyceride 16:0_38:4	Triglycerides	3	3.1	1.5	4.7	1.5			1.6	100	0.71	3
TG 16:0_38:5	Triacylglyceride 16:0_38:5	Triglycerides	4.2	3.9	2.2	5.1	2.2			1.5	100	0.072	3
TG 16:0_38:6	Triacylglyceride 16:0_38:6	Triglycerides	2.5	2.5	1.4	3.5	1.4			1	100	0.06085	3
TG 16:0_38:7	Triacylglyceride 16:0_38:7	Triglycerides	0.64	0.66	0.34	0.99	0.34			0.33	100	0.176	3
TG 16:0_40:6	Triacylglyceride 16:0_40:6	Triglycerides	1.2	1.4	1.1	1.8	1.1			0.37	100	0.07978	3
TG 16:0_40:7	Triacylglyceride 16:0_40:7	Triglycerides	1.6	1.5	0.97	2	0.97			0.51	100	0.14235	3
TG 16:0_40:8	Triacylglyceride 16:0_40:8	Triglycerides	0.84	0.73	0.4	0.94	0.4			0.29	100	0.0785	3
TG 16:1_28:0	Triacylglyceride 16:1_28:0	Triglycerides	0.15	0.24	0.054	0.5	0.054			0.23	100	0.16	3
TG 16:1_30:1	Triacylglyceride 16:1_30:1	Triglycerides	0.51	0.59	0.2	1.1	0.2			0.44	100	0.204	3
TG 16:1_32:0	Triacylglyceride 16:1_32:0	Triglycerides	3	3.5	0.91	6.4	0.91			2.8	100	0.33	3
TG 16:1_32:1	Triacylglyceride 16:1_32:1	Triglycerides	4.9	4.3	1.7	6.1	1.7			2.3	100	0.379	3
TG 16:1_32:2	Triacylglyceride 16:1_32:2	Triglycerides	1.8	1.8	0.9	2.6	0.9			0.83	100	0.216	3
TG 16:1_33:1	Triacylglyceride 16:1_33:1	Triglycerides	0.34	0.37	0.23	0.54	0.23			0.16	100	0.441	3
TG 16:1_34:0	Triacylglyceride 16:1_34:0	Triglycerides	3	2.5	1	3.4	1			1.3	100	0.183	3
TG 16:1_34:1	Triacylglyceride 16:1_34:1	Triglycerides	22	21	11	28	11			8.6	100	0.367	3
TG 16:1_34:2	Triacylglyceride 16:1_34:2	Triglycerides	16	15	10	19	10			4.4	100	0.233	3
TG 16:1_34:3	Triacylglyceride 16:1_34:3	Triglycerides	3.5	3.4	2.8	4	2.8			0.57	100	0.101	3
TG 16:1_36:1	Triacylglyceride 16:1_36:1	Triglycerides	2.7	2.8	1.8	3.9	1.8			1.1	100	0.165	3
TG 16:1_36:2	Triacylglyceride 16:1_36:2	Triglycerides	10	14	9.2	24	9.2			8.3	100	0.218	3
TG 16:1_36:3	Triacylglyceride 16:1_36:3	Triglycerides	14	17	11	26	11			7.9	100	0.1515	3
TG 16:1_36:4	Triacylglyceride 16:1_36:4	Triglycerides	5.8	6.9	5.8	9.1	5.8			1.9	100	0.087	3
TG 16:1_36:5	Triacylglyceride 16:1_36:5	Triglycerides	1.6	1.4	1	1.6	1			0.34	100	0.049255	3
TG 16:1_38:3	Triacylglyceride 16:1_38:3	Triglycerides	0.38	0.44	0.21	0.75	0.21			0.28	100	0.14	3
TG 16:1_38:4	Triacylglyceride 16:1_38:4	Triglycerides	0.66	0.66	0.41	0.91	0.41			0.25	100	0.147	3
TG 16:1_38:5	Triacylglyceride 16:1_38:5	Triglycerides	0.84	0.8	0.66	0.9	0.66			0.12	100	0.22	3
TG 17:0_32:1	Triacylglyceride 17:0_32:1	Triglycerides	0.29	0.27	0.1	0.41	0.1			0.15	100	0.1675	3
TG 17:0_34:1	Triacylglyceride 17:0_34:1	Triglycerides	1.6	1.3	0.68	1.7	0.68			0.55	100	0.307	3
TG 17:0_34:2	Triacylglyceride 17:0_34:2	Triglycerides	1.6	1.4	0.83	1.7	0.83			0.49	100	0.132	3
TG 17:0_34:3	Triacylglyceride 17:0_34:3	Triglycerides	0.45	0.46	0.38	0.55	0.38			0.087	100	0.0759	3
TG 17:0_36:3	Triacylglyceride 17:0_36:3	Triglycerides	1.7	2.1	1.6	2.9	1.6			0.72	100	0.07783	3
TG 17:0_36:4	Triacylglyceride 17:0_36:4	Triglycerides	1.2	1.1	0.84	1.2	0.84			0.22	100	0.05679	3
TG 17:1_32:1	Triacylglyceride 17:1_32:1	Triglycerides	0.36	0.34	0.17	0.5	0.17			0.17	100	0.1395	3
TG 17:1_34:1	Triacylglyceride 17:1_34:1	Triglycerides	1.4	1.4	0.73	2.1	0.73			0.67	100	0.219	3
TG 17:1_34:2	Triacylglyceride 17:1_34:2	Triglycerides	1.1	1	0.59	1.4	0.59			0.41	100	0.100895	3
TG 17:1_34:3	Triacylglyceride 17:1_34:3	Triglycerides	0.34	0.33	0.29	0.37	0.29			0.036	100	0.0718	3
TG 17:1_36:3	Triacylglyceride 17:1_36:3	Triglycerides	0.89	1	0.64	1.5	0.64			0.45	100	0.05202	3
TG 17:1_36:4	Triacylglyceride 17:1_36:4	Triglycerides	0.55	0.48	0.32	0.57	0.32			0.14	100	0.050025	3
TG 17:1_36:5	Triacylglyceride 17:1_36:5	Triglycerides	0.22	0.2	0.075	0.3	0.075			0.11	100	0.0569	3
TG 17:1_38:5	Triacylglyceride 17:1_38:5	Triglycerides	0.0069	0.0063	0.0044	0.0076	0.0044			0.0016	100	0.014	3
TG 17:1_38:6	Triacylglyceride 17:1_38:6	Triglycerides	0.012	0.015	0.011	0.022	0.011			0.0064	100	0.019675	3
TG 17:1_38:7	Triacylglyceride 17:1_38:7	Triglycerides	0.03	0.034	0.015	0.055	0.015			0.02	100	0.02356	3
TG 17:2_34:2	Triacylglyceride 17:2_34:2	Triglycerides	0.3	0.28	0.13	0.42	0.13			0.15	100	0.093	3
TG 17:2_34:3	Triacylglyceride 17:2_34:3	Triglycerides	0.2	0.18	0.09	0.25	0.09			0.084	100	0.05748	3
TG 17:2_36:2	Triacylglyceride 17:2_36:2	Triglycerides	0.25	0.24	0.14	0.34	0.14			0.099	100	0.097	3
TG 17:2_36:3	Triacylglyceride 17:2_36:3	Triglycerides	0.31	0.3	0.15	0.44	0.15			0.14	100	0.1019	3
TG 17:2_36:4	Triacylglyceride 17:2_36:4	Triglycerides	0.28	0.34	0.15	0.6	0.15			0.23	100	0.1239	3
TG 17:2_38:5	Triacylglyceride 17:2_38:5	Triglycerides	0.12	0.16	0.078	0.3	0.078			0.12	100	0.0401	3
TG 17:2_38:6	Triacylglyceride 17:2_38:6	Triglycerides	0.21	0.25	0.12	0.41	0.12			0.15	100	0.0539	3
TG 17:2_38:7	Triacylglyceride 17:2_38:7	Triglycerides	0.09	0.075	0.041	0.095	0.041			0.03	100	0.031795	3
TG 18:0_30:0	Triacylglyceride 18:0_30:0	Triglycerides	0.41	0.53	0.055	1.1	0.055			0.54	100	0.245	3
TG 18:0_30:1	Triacylglyceride 18:0_30:1	Triglycerides	0.36	0.37	0.12	0.63	0.12			0.26	100	0.1235	3
TG 18:0_32:0	Triacylglyceride 18:0_32:0	Triglycerides	2.6	2.6	2	3.3				0.94	67	0.428	3
TG 18:0_32:1	Triacylglyceride 18:0_32:1	Triglycerides	2.1	2	0.52	3.4	0.52			1.4	100	0.18	3
TG 18:0_32:2	Triacylglyceride 18:0_32:2	Triglycerides	0.98	1	0.27	1.8	0.27			0.77	100	0.1135	3
TG 18:0_34:2	Triacylglyceride 18:0_34:2	Triglycerides	9.1	7.8	2.8	12	2.8			4.5	100	0.218	3
TG 18:0_34:3	Triacylglyceride 18:0_34:3	Triglycerides	1.8	1.6	0.82	2.3	0.82			0.75	100	0.072495	3
TG 18:0_36:1	Triacylglyceride 18:0_36:1	Triglycerides	1.9	1.5	0.26	2.2	0.26			1.1	100	0.5	3
TG 18:0_36:2	Triacylglyceride 18:0_36:2	Triglycerides	10	9.6	3.6	15	3.6			5.8	100	2.56	3
TG 18:0_36:3	Triacylglyceride 18:0_36:3	Triglycerides	15	13	5.5	18	5.5			6.7	100	0.271	3
TG 18:0_36:4	Triacylglyceride 18:0_36:4	Triglycerides	7.7	6.9	2.8	10	2.8			3.8	100	0.135	3
TG 18:0_36:5	Triacylglyceride 18:0_36:5	Triglycerides	1	1.2	0.52	2	0.52			0.76	100	0.037365	3
TG 18:0_38:6	Triacylglyceride 18:0_38:6	Triglycerides	0.77	0.76	0.62	0.88	0.62			0.13	100	0.07297	3
TG 18:0_38:7	Triacylglyceride 18:0_38:7	Triglycerides	0.22	0.22	0.2	0.25	0.2			0.023	100	0.095	3
TG 18:1_26:0	Triacylglyceride 18:1_26:0	Triglycerides	0.39	0.63	0.17	1.3	0.17			0.61	100	0.183	3
TG 18:1_28:1	Triacylglyceride 18:1_28:1	Triglycerides	0.89	0.97	0.33	1.7	0.33			0.69	100	0.2255	3
TG 18:1_30:0	Triacylglyceride 18:1_30:0	Triglycerides	12	8.8	2.4	12	2.4			5.6	100	0.601	3
TG 18:1_30:1	Triacylglyceride 18:1_30:1	Triglycerides	5.9	5.4	2.1	8.1	2.1			3	100	0.34	3
TG 18:1_30:2	Triacylglyceride 18:1_30:2	Triglycerides	2.2	1.8	0.82	2.3	0.82			0.83	100	0.226	3
TG 18:1_31:0	Triacylglyceride 18:1_31:0	Triglycerides	1.2	1.1	0.58	1.6	0.58			0.51	100	0.663	3
TG 18:1_32:0	Triacylglyceride 18:1_32:0	Triglycerides	39	32	11	46	11			19	100	0.592	3
TG 18:1_32:1	Triacylglyceride 18:1_32:1	Triglycerides	35	38	19	60	19			21	100	0.402	3
TG 18:1_32:2	Triacylglyceride 18:1_32:2	Triglycerides	13	14	6.9	21	6.9			6.9	100	0.2255	3
TG 18:1_32:3	Triacylglyceride 18:1_32:3	Triglycerides	2.7	2.2	1.1	2.7	1.1			0.88	100	0.06903	3
TG 18:1_33:0	Triacylglyceride 18:1_33:0	Triglycerides	1.5	1.4	0.66	2	0.66			0.7	100	0.181	3
TG 18:1_33:1	Triacylglyceride 18:1_33:1	Triglycerides	3	3.8	2.4	6	2.4			1.9	100	0.2	3
TG 18:1_33:2	Triacylglyceride 18:1_33:2	Triglycerides	1.5	1.9	1.4	2.7	1.4			0.76	100	0.126	3
TG 18:1_33:3	Triacylglyceride 18:1_33:3	Triglycerides	0.44	0.43	0.26	0.6	0.26			0.17	100	0.195	3
TG 18:1_34:1	Triacylglyceride 18:1_34:1	Triglycerides	129	179	92	316	92			120	100	0.907	3
TG 18:1_34:2	Triacylglyceride 18:1_34:2	Triglycerides	111	138	86	219	86			71	100	0.561	3
TG 18:1_34:3	Triacylglyceride 18:1_34:3	Triglycerides	21	25	18	35	18			9.3	100	0.1655	3
TG 18:1_34:4	Triacylglyceride 18:1_34:4	Triglycerides	2.3	2.8	2.1	3.8	2.1			0.9	100	0.062285	3
TG 18:1_35:2	Triacylglyceride 18:1_35:2	Triglycerides	2.4	3.3	2.2	5.2	2.2			1.7	100	0.1195	3
TG 18:1_35:3	Triacylglyceride 18:1_35:3	Triglycerides	1.2	1.3	0.98	1.7	0.98			0.35	100	0.05142	3
TG 18:1_36:0	Triacylglyceride 18:1_36:0	Triglycerides	2.4	2.3	0.73	3.8	0.73			1.5	100	0.849	3
TG 18:1_36:1	Triacylglyceride 18:1_36:1	Triglycerides	18	21	8.6	37	8.6			14	100	0.69	3
TG 18:1_36:2	Triacylglyceride 18:1_36:2	Triglycerides	57	78	34	145	34			59	100	0.783	3
TG 18:1_36:3	Triacylglyceride 18:1_36:3	Triglycerides	93	97	43	153	43			55	100	15.8	3
TG 18:1_36:4	Triacylglyceride 18:1_36:4	Triglycerides	54	44	19	59	19			22	100	0.25	3
TG 18:1_36:5	Triacylglyceride 18:1_36:5	Triglycerides	9.4	9.4	4.3	15	4.3			5.2	100	0.07562	3
TG 18:1_36:6	Triacylglyceride 18:1_36:6	Triglycerides	0.87	0.99	0.44	1.6	0.44			0.61	100	0.216	3
TG 18:1_38:5	Triacylglyceride 18:1_38:5	Triglycerides	3.3	3.9	3.1	5.3	3.1			1.2	100	0.06176	3
TG 18:1_38:6	Triacylglyceride 18:1_38:6	Triglycerides	2.8	2.7	2	3.1	2			0.57	100	0.05392	3
TG 18:1_38:7	Triacylglyceride 18:1_38:7	Triglycerides	0.68	0.75	0.64	0.91	0.64			0.15	100	0.298	3
TG 18:2_28:0	Triacylglyceride 18:2_28:0	Triglycerides	1	1.2	0.36	2.3	0.36			0.97	100	0.125	3
TG 18:2_30:0	Triacylglyceride 18:2_30:0	Triglycerides	6.6	6	1.7	9.7	1.7			4	100	0.1525	3
TG 18:2_30:1	Triacylglyceride 18:2_30:1	Triglycerides	4.1	3.4	1.4	4.6	1.4			1.7	100	0.129	3
TG 18:2_31:0	Triacylglyceride 18:2_31:0	Triglycerides	0.9	0.84	0.46	1.1	0.46			0.35	100	0.411	3
TG 18:2_32:0	Triacylglyceride 18:2_32:0	Triglycerides	27	23	9.2	33	9.2			13	100	0.333	3
TG 18:2_32:1	Triacylglyceride 18:2_32:1	Triglycerides	24	23	14	32	14			9.1	100	0.229	3
TG 18:2_32:2	Triacylglyceride 18:2_32:2	Triglycerides	11	8.7	4.3	11	4.3			3.8	100	0.128	3
TG 18:2_33:0	Triacylglyceride 18:2_33:0	Triglycerides	1.2	0.99	0.54	1.2	0.54			0.39	100	0.208	3
TG 18:2_33:1	Triacylglyceride 18:2_33:1	Triglycerides	2.4	2.5	1.7	3.3	1.7			0.84	100	0.127	3
TG 18:2_33:2	Triacylglyceride 18:2_33:2	Triglycerides	1.5	1.3	0.96	1.5	0.96			0.31	100	0.078005	3
TG 18:2_34:0	Triacylglyceride 18:2_34:0	Triglycerides	17	15	7.7	22	7.7			7.1	100	0.2315	3
TG 18:2_34:1	Triacylglyceride 18:2_34:1	Triglycerides	107	123	73	190	73			60	100	0.495	3
TG 18:2_34:2	Triacylglyceride 18:2_34:2	Triglycerides	94	90	57	119	57			31	100	0.378	3
TG 18:2_34:3	Triacylglyceride 18:2_34:3	Triglycerides	17	15	11	18	11			3.7	100	0.1215	3
TG 18:2_34:4	Triacylglyceride 18:2_34:4	Triglycerides	2	1.8	1.4	2	1.4			0.37	100	0.057	3
TG 18:2_35:1	Triacylglyceride 18:2_35:1	Triglycerides	1.9	2.2	1.6	3.1	1.6			0.82	100	0.114	3
TG 18:2_35:2	Triacylglyceride 18:2_35:2	Triglycerides	2.1	2.3	1.6	3.1	1.6			0.78	100	0.06609	3
TG 18:2_35:3	Triacylglyceride 18:2_35:3	Triglycerides	1	0.86	0.58	1	0.58			0.25	100	0.047425	3
TG 18:2_36:0	Triacylglyceride 18:2_36:0	Triglycerides	2.7	2	0.75	2.7	0.75			1.1	100	0.566	3
TG 18:2_36:1	Triacylglyceride 18:2_36:1	Triglycerides	18	16	6.6	23	6.6			8.4	100	3.72	3
TG 18:2_36:2	Triacylglyceride 18:2_36:2	Triglycerides	61	56	24	83	24			30	100	8.23	3
TG 18:2_36:3	Triacylglyceride 18:2_36:3	Triglycerides	72	60	23	87	23			33	100	6.29	3
TG 18:2_36:4	Triacylglyceride 18:2_36:4	Triglycerides	27	32	10	58	10			24	100	0.2455	3
TG 18:2_36:5	Triacylglyceride 18:2_36:5	Triglycerides	4.6	6.6	2.2	13	2.2			5.7	100	0.052265	3
TG 18:2_38:4	Triacylglyceride 18:2_38:4	Triglycerides	1.7	1.9	1.6	2.3	1.6			0.41	100	0.039855	3
TG 18:2_38:5	Triacylglyceride 18:2_38:5	Triglycerides	2.5	2.6	2.3	2.9	2.3			0.29	100	0.03866	3
TG 18:2_38:6	Triacylglyceride 18:2_38:6	Triglycerides	1.7	1.6	1.2	2.1	1.2			0.45	100	0.04415	3
TG 18:3_30:0	Triacylglyceride 18:3_30:0	Triglycerides	0.75	0.8	0.2	1.4	0.2			0.62	100	0.066435	3
TG 18:3_32:0	Triacylglyceride 18:3_32:0	Triglycerides	3.2	3	1.2	4.6	1.2			1.7	100	0.1495	3
TG 18:3_32:1	Triacylglyceride 18:3_32:1	Triglycerides	3.8	3.2	1.7	4	1.7			1.3	100	0.418	3
TG 18:3_33:2	Triacylglyceride 18:3_33:2	Triglycerides	0.097	0.083	0.053	0.1	0.053			0.026	100	0.04214	3
TG 18:3_34:0	Triacylglyceride 18:3_34:0	Triglycerides	2.3	1.9	0.95	2.5	0.95			0.86	100	0.1155	3
TG 18:3_34:1	Triacylglyceride 18:3_34:1	Triglycerides	17	16	9.4	21	9.4			5.9	100	0.158	3
TG 18:3_34:2	Triacylglyceride 18:3_34:2	Triglycerides	13	11	7.2	14	7.2			3.7	100	0.1065	3
TG 18:3_34:3	Triacylglyceride 18:3_34:3	Triglycerides	2.3	2.2	1.6	2.6	1.6			0.51	100	0.070245	3
TG 18:3_35:2	Triacylglyceride 18:3_35:2	Triglycerides	0.5	0.43	0.26	0.52	0.26			0.14	100	0.123	3
TG 18:3_36:1	Triacylglyceride 18:3_36:1	Triglycerides	2.4	2.1	1	2.9	1			1	100	0.06133	3
TG 18:3_36:2	Triacylglyceride 18:3_36:2	Triglycerides	9.9	8.4	4.2	11	4.2			3.7	100	0.0804964	3
TG 18:3_36:3	Triacylglyceride 18:3_36:3	Triglycerides	10	9.8	4.6	15	4.6			5	100	0.07724	3
TG 18:3_36:4	Triacylglyceride 18:3_36:4	Triglycerides	3.5	4.7	1.9	8.7	1.9			3.6	100	0.068	3
TG 18:3_38:5	Triacylglyceride 18:3_38:5	Triglycerides	0.61	0.62	0.56	0.68	0.56			0.057	100	0.152	3
TG 18:3_38:6	Triacylglyceride 18:3_38:6	Triglycerides	0.35	0.34	0.31	0.36	0.31			0.026	100	0.113	3
TG 20:0_32:3	Triacylglyceride 20:0_32:3	Triglycerides	0.39	0.39	0.22	0.56	0.22			0.17	100	0.124	3
TG 20:0_32:4	Triacylglyceride 20:0_32:4	Triglycerides	0.47	0.41	0.29	0.47	0.29			0.11	100	0.117	3
TG 20:0_34:1	Triacylglyceride 20:0_34:1	Triglycerides	0.83	0.85	0.42	1.3	0.42			0.44	100	0.167	3
TG 20:1_24:3	Triacylglyceride 20:1_24:3	Triglycerides									0	1.5755	3
TG 20:1_26:1	Triacylglyceride 20:1_26:1	Triglycerides	0.001	0.001	0.0009	0.0012				0.0003	67	0.248	3
TG 20:1_30:1	Triacylglyceride 20:1_30:1	Triglycerides	0.098	0.092	0.07	0.11	0.07			0.02	100	0.09108	3
TG 20:1_32:0	Triacylglyceride 20:1_32:0	Triglycerides	0.15	0.15	0.14	0.17				0.016	67	0.047	3
TG 20:1_32:1	Triacylglyceride 20:1_32:1	Triglycerides	0.47	0.47	0.37	0.57				0.14	67	0.0905	3
TG 20:1_32:2	Triacylglyceride 20:1_32:2	Triglycerides	0.23	0.25	0.13	0.4	0.13			0.14	100	0.102	3
TG 20:1_32:3	Triacylglyceride 20:1_32:3	Triglycerides	0.26	0.24	0.17	0.29	0.17			0.067	100	0.099	3
TG 20:1_34:0	Triacylglyceride 20:1_34:0	Triglycerides	0.22	0.21	0.081	0.32	0.081			0.12	100	0.1145	3
TG 20:1_34:1	Triacylglyceride 20:1_34:1	Triglycerides	1.1	1.3	0.46	2.5	0.46			1	100	0.099165	3
TG 20:1_34:2	Triacylglyceride 20:1_34:2	Triglycerides	0.99	1.1	0.45	2	0.45			0.78	100	0.33	3
TG 20:1_34:3	Triacylglyceride 20:1_34:3	Triglycerides	0.35	0.35	0.3	0.4				0.068	67	0.116	3
TG 20:2_32:0	Triacylglyceride 20:2_32:0	Triglycerides			0.64	0.64					33	0.145	3
TG 20:2_32:1	Triacylglyceride 20:2_32:1	Triglycerides	0.58	0.51	0.18	0.78	0.18			0.31	100	0.0827	3
TG 20:2_34:1	Triacylglyceride 20:2_34:1	Triglycerides	1.2	1.4	0.59	2.4	0.59			0.93	100	0.05495	3
TG 20:2_34:2	Triacylglyceride 20:2_34:2	Triglycerides	1.3	1.2	0.48	1.9	0.48			0.74	100	0.041	3
TG 20:2_34:3	Triacylglyceride 20:2_34:3	Triglycerides	0.42	0.36	0.16	0.5	0.16			0.18	100	0.106	3
TG 20:2_34:4	Triacylglyceride 20:2_34:4	Triglycerides	0.043	0.052	0.021	0.091	0.021			0.036	100	0.01616	3
TG 20:2_36:5	Triacylglyceride 20:2_36:5	Triglycerides	0.14	0.12	0.064	0.16	0.064			0.052	100	0.0419	3
TG 20:3_32:0	Triacylglyceride 20:3_32:0	Triglycerides	0.8	0.74	0.21	1.2	0.21			0.51	100	0.0726	3
TG 20:3_32:1	Triacylglyceride 20:3_32:1	Triglycerides	0.98	0.81	0.42	1	0.42			0.34	100	0.097	3
TG 20:3_32:2	Triacylglyceride 20:3_32:2	Triglycerides	0.52	0.43	0.23	0.55	0.23			0.18	100	0.0646	3
TG 20:3_34:0	Triacylglyceride 20:3_34:0	Triglycerides	0.5	0.44	0.21	0.61	0.21			0.21	100	0.0597	3
TG 20:3_34:1	Triacylglyceride 20:3_34:1	Triglycerides	2.7	2.8	1.4	4.3	1.4			1.4	100	0.069705	3
TG 20:3_34:2	Triacylglyceride 20:3_34:2	Triglycerides	2.4	2.5	1.5	3.4	1.5			0.94	100	0.045	3
TG 20:3_34:3	Triacylglyceride 20:3_34:3	Triglycerides	0.61	0.58	0.38	0.75	0.38			0.19	100	0.109	3
TG 20:3_36:3	Triacylglyceride 20:3_36:3	Triglycerides	1.3	1.5	1.2	1.9	1.2			0.41	100	0.032735	3
TG 20:3_36:4	Triacylglyceride 20:3_36:4	Triglycerides	0.86	0.82	0.69	0.92	0.69			0.12	100	0.207	3
TG 20:3_36:5	Triacylglyceride 20:3_36:5	Triglycerides	0.31	0.34	0.27	0.42	0.27			0.075	100	0.0939	3
TG 20:4_30:0	Triacylglyceride 20:4_30:0	Triglycerides	0.55	0.76	0.19	1.5	0.19			0.7	100	0.053755	3
TG 20:4_32:0	Triacylglyceride 20:4_32:0	Triglycerides	1.9	2.3	0.82	4.2	0.82			1.7	100	0.116	3
TG 20:4_32:1	Triacylglyceride 20:4_32:1	Triglycerides	2.3	2.5	1.2	4	1.2			1.4	100	0.062815	3
TG 20:4_32:2	Triacylglyceride 20:4_32:2	Triglycerides	0.66	0.95	0.52	1.7	0.52			0.63	100	0.0976	3
TG 20:4_33:2	Triacylglyceride 20:4_33:2	Triglycerides	0.17	0.25	0.17	0.42	0.17			0.14	100	0.0292	3
TG 20:4_34:0	Triacylglyceride 20:4_34:0	Triglycerides	1.3	1.3	0.76	1.9	0.76			0.56	100	0.209	3
TG 20:4_34:1	Triacylglyceride 20:4_34:1	Triglycerides	11	9.6	6.2	12	6.2			3	100	0.0695	3
TG 20:4_34:2	Triacylglyceride 20:4_34:2	Triglycerides	7.9	8.1	6.1	10	6.1			2.1	100	0.052835	3
TG 20:4_34:3	Triacylglyceride 20:4_34:3	Triglycerides	1.5	1.7	1.4	2.3	1.4			0.52	100	0.317	3
TG 20:4_35:3	Triacylglyceride 20:4_35:3	Triglycerides	0.063	0.072	0.053	0.1	0.053			0.025	100	0.02652	3
TG 20:4_36:2	Triacylglyceride 20:4_36:2	Triglycerides	5.5	5.9	5.5	6.8	5.5			0.72	100	2.4	3
TG 20:4_36:3	Triacylglyceride 20:4_36:3	Triglycerides	6.2	6.1	5.7	6.4	5.7			0.38	100	1.829	3
TG 20:4_36:4	Triacylglyceride 20:4_36:4	Triglycerides	3	3.2	2.6	4.1	2.6			0.76	100	0.638	3
TG 20:4_36:5	Triacylglyceride 20:4_36:5	Triglycerides	0.97	1.1	0.81	1.4	0.81			0.33	100	0.1358	3
TG 20:5_34:0	Triacylglyceride 20:5_34:0	Triglycerides	0.25	0.28	0.08	0.51	0.08			0.22	100	0.0528	3
TG 20:5_34:1	Triacylglyceride 20:5_34:1	Triglycerides	1.7	1.6	0.63	2.5	0.63			0.96	100	0.064385	3
TG 20:5_34:2	Triacylglyceride 20:5_34:2	Triglycerides	1.2	1.3	0.59	2	0.59			0.72	100	0.08757	3
TG 20:5_36:2	Triacylglyceride 20:5_36:2	Triglycerides	1	1	0.66	1.4	0.66			0.37	100	0.151	3
TG 20:5_36:3	Triacylglyceride 20:5_36:3	Triglycerides	0.98	1.1	0.66	1.6	0.66			0.48	100	0.179	3
TG 22:0_32:4	Triacylglyceride 22:0_32:4	Triglycerides	0.036	0.029	0.0071	0.045	0.0071			0.02	100	0.03057	3
TG 22:1_32:5	Triacylglyceride 22:1_32:5	Triglycerides	0.025	0.028	0.011	0.049	0.011			0.019	100	0.02262	3
TG 22:2_32:4	Triacylglyceride 22:2_32:4	Triglycerides	0.025	0.03	0.0068	0.058	0.0068			0.026	100	0.018395	3
TG 22:3_30:2	Triacylglyceride 22:3_30:2	Triglycerides									0	0.0503929	3
TG 22:4_32:0	Triacylglyceride 22:4_32:0	Triglycerides	0.2	0.19	0.058	0.32	0.058			0.13	100	0.039	3
TG 22:4_32:2	Triacylglyceride 22:4_32:2	Triglycerides	0.12	0.12	0.11	0.14				0.016	67	0.04003	3
TG 22:4_34:2	Triacylglyceride 22:4_34:2	Triglycerides	0.58	0.62	0.5	0.78	0.5			0.14	100	0.07104	3
TG 22:5_32:0	Triacylglyceride 22:5_32:0	Triglycerides	0.43	0.41	0.21	0.59	0.21			0.19	100	0.1105	3
TG 22:5_32:1	Triacylglyceride 22:5_32:1	Triglycerides	0.56	0.5	0.31	0.61	0.31			0.16	100	0.0876	3
TG 22:5_34:1	Triacylglyceride 22:5_34:1	Triglycerides	1.7	1.9	1.6	2.5	1.6			0.47	100	0.791	3
TG 22:5_34:2	Triacylglyceride 22:5_34:2	Triglycerides	1.8	1.8	1.6	2	1.6			0.21	100	0.775	3
TG 22:5_34:3	Triacylglyceride 22:5_34:3	Triglycerides	0.4	0.39	0.36	0.4	0.36			0.023	100	0.168	3
TG 22:6_32:0	Triacylglyceride 22:6_32:0	Triglycerides	0.8	0.95	0.23	1.8	0.23			0.81	100	0.071	3
TG 22:6_32:1	Triacylglyceride 22:6_32:1	Triglycerides	1	0.93	0.35	1.4	0.35			0.55	100	0.099	3
TG 22:6_34:1	Triacylglyceride 22:6_34:1	Triglycerides	4.1	3.5	1.6	4.7	1.6			1.6	100	0.08105	3
TG 22:6_34:2	Triacylglyceride 22:6_34:2	Triglycerides	3.6	3.2	1.8	4.1	1.8			1.2	100	0.072975	3
TG 22:6_34:3	Triacylglyceride 22:6_34:3	Triglycerides	0.9	0.85	0.5	1.2	0.5			0.33	100	0.126	3
Hex3Cer d18:1/16:0	Trihexosylceramide d18:1/16:0	Trihexosylceramides	1.5	1.5	1.4	1.6	1.4			0.09	100	0.025	3
Hex3Cer d18:1/18:0	Trihexosylceramide d18:1/18:0	Trihexosylceramides	0.18	0.16	0.096	0.19	0.096			0.051	100	0.0639	3
Hex3Cer d18:1/20:0	Trihexosylceramide d18:1/20:0	Trihexosylceramides	0.075	0.076	0.067	0.087	0.067			0.01	100	0.023	3
Hex3Cer d18:1/22:0	Trihexosylceramide d18:1/22:0	Trihexosylceramides	0.22	0.23	0.18	0.28	0.18			0.047	100	0.061	3
Hex3Cer d18:1/24:1	Trihexosylceramide d18:1/24:1	Trihexosylceramides	0.55	0.57	0.48	0.68	0.48			0.1	100	0.158	3
Hex3Cer d18:1/26:1	Trihexosylceramide d18:1/26:1	Trihexosylceramides	0.045	0.044	0.039	0.048	0.039			0.0047	100	0.01739	3
Choline	Choline	Vitamins and Cofactors	10	10	7.2	13	7.2			3	100	0.26	3
Disclaimer:
The reference ranges do not represent a diagnosis but serve as a means of comparison only. A reference range provides no statement about whether a person is sick or healthy.
Individuals with metabolite concentrations outside the range can therefore be healthy and individuals with metabolite concentrations in the reference range can be ill.
Note that the MxP Quant 500 kit quantitatively measures up to 630 metabolites from 26 biochemical classes.
Depending on what instruments the samples were measured on, between 628 and 634 metabolites were assessed per group.

## Sheet: Black-female-30s
Quantitative metabolomics database (QMDB)
Selected matrix:	human plasma
Assay:	MxP® Quant 500
Age:	30 to 39
Gender:	f
Ethnicity:	Black or African American
Samples found matching the preferences	5
Short Name	Metabolite	Class	Median [µM]	Mean [µM]	Min [µM]	Max [µM]	1st quartile [µM]	3rd quartile [µM]	Interquartal range [µM]	Standard deviation	% of samples > LOD	Typical LOD [µM]	No of samples
C0	Carnitine	Acylcarnitines	37	36	23	46	30	41	11	8.1	100	1.5065	5
C2	Acetylcarnitine	Acylcarnitines	4	4.3	2.8	6.1	3.2	5.5	2.4	1.3	100	0.060515	5
C3	Propionylcarnitine	Acylcarnitines	0.33	0.41	0.19	0.78	0.22	0.67	0.45	0.26	80	0.098	5
C3-DC (C4-OH)	Malonylcarnitine (Hydroxybutyrylcarnitine)	Acylcarnitines	0.055	0.055	0.05	0.059				0.0062	40	0.057	5
C3-OH	Hydroxypropionylcarnitine	Acylcarnitines									0	0.363	5
C3:1	Propenoylcarnitine	Acylcarnitines									0	0.0362	5
C4	Butyrylcarnitine	Acylcarnitines	0.14	0.12	0.06	0.14	0.079	0.14	0.059	0.038	80	0.0604	5
C4:1	Butenylcarnitine	Acylcarnitines									0	0.054	5
C5	Valerylcarnitine	Acylcarnitines	0.11	0.098	0.05	0.12	0.063	0.12	0.059	0.033	80	0.0504	5
C5-DC (C6-OH)	Glutarylcarnitine (Hydroxyhexanoylcarnitine)	Acylcarnitines									0	0.09628	5
C5-M-DC	Methylglutarylcarnitine	Acylcarnitines									0	0.06872	5
C5-OH (C3-DC-M)	Hydroxyvalerylcarnitine (Methylmalonylcarnitine)	Acylcarnitines	0.062	0.062	0.052	0.071				0.014	40	0.1	5
C5:1	Tiglylcarnitine	Acylcarnitines			0.016	0.016					20	0.04377	5
C5:1-DC	Glutaconylcarnitine	Acylcarnitines									0	0.0423541	5
C6 (C4:1-DC)	Hexanoylcarnitine (Fumarylcarnitine)	Acylcarnitines	0.072	0.072	0.035	0.11				0.052	40	0.153	5
C6:1	Hexenoylcarnitine	Acylcarnitines									0	0.09068	5
C7-DC	Pimelylcarnitine	Acylcarnitines	0.018	0.018	0.0095	0.027				0.012	40	0.060255	5
C8	Octanoylcarnitine	Acylcarnitines	0.3	0.3	0.04	0.56				0.37	40	0.223	5
C9	Nonanoylcarnitine	Acylcarnitines			0.063	0.063					20	0.028	5
C10	Decanoylcarnitine	Acylcarnitines	0.34	0.47	0.14	0.92	0.14			0.4	60	0.1295	5
C10:1	Decenoylcarnitine	Acylcarnitines									0	0.4035	5
C10:2	Decadienoylcarnitine	Acylcarnitines			0.081	0.081					20	0.1085	5
C12	Dodecanoylcarnitine	Acylcarnitines	0.13	0.13	0.053	0.2				0.1	40	0.072	5
C12-DC	Dodecanedioylcarnitine	Acylcarnitines									0	1.019	5
C12:1	Dodecenoylcarnitine	Acylcarnitines									0	0.109	5
C14	Tetradecanoylcarnitine	Acylcarnitines			0.04	0.04					20	0.0599	5
C14:1	Tetradecenoylcarnitine	Acylcarnitines	0.06	0.064	0.056	0.075	0.056			0.01	60	0.0349	5
C14:1-OH	Hydroxytetradecenoylcarnitine	Acylcarnitines			0.04	0.04					20	0.035385	5
C14:2	Tetradecadienoylcarnitine	Acylcarnitines	0.11	0.11	0.058	0.17				0.08	40	0.0322	5
C14:2-OH	Hydroxytetradecadienoylcarnitine	Acylcarnitines			0.021	0.021					20	0.031	5
C16	Hexadecanoylcarnitine	Acylcarnitines	0.087	0.087	0.076	0.099				0.017	40	0.088	5
C16-OH	Hydroxyhexadecanoylcarnitine	Acylcarnitines									0	0.077	5
C16:1	Hexadecenoylcarnitine	Acylcarnitines	0.049	0.049	0.031	0.067				0.025	40	0.05	5
C16:1-OH	Hydroxyhexadecenoylcarnitine	Acylcarnitines									0	0.039895	5
C16:2	Hexadecadienoylcarnitine	Acylcarnitines			0.018	0.018					20	0.02942	5
C16:2-OH	Hydroxyhexadecadienoylcarnitine	Acylcarnitines			0.0093	0.0093					20	0.041045	5
C18	Octadecanoylcarnitine	Acylcarnitines	0.028	0.028	0.027	0.028				0.0007	40	0.02201	5
C18:1	Octadecenoylcarnitine	Acylcarnitines	0.12	0.12	0.11	0.14				0.026	40	0.082855	5
C18:1-OH	Hydroxyoctadecenoylcarnitine	Acylcarnitines									0	0.0687	5
C18:2	Octadecadienoylcarnitine	Acylcarnitines	0.079	0.077	0.058	0.094	0.061	0.092	0.031	0.016	80	0.0347	5
Trigonelline	Trigonelline	Alkaloids	0.13	0.15	0.086	0.25	0.088	0.23	0.14	0.076	80	0.042595	5
TMAO	Trimethylamine N-oxide	Amine Oxides	2.7	2.7	1.9	4.6	1.9	3.6	1.8	1.1	100	0.108	5
1-Met-His	1-Methylhistidine	Amino Acid Related	4.3	4.6	3.2	6.4	3.4	5.9	2.5	1.3	100	0.01	5
3-Met-His	3-Methylhistidine	Amino Acid Related	3.2	5.2	1.1	12	1.1	10	9.3	4.9	100	0.01	5
5-AVA	5-Aminovaleric acid	Amino Acid Related	0.059	0.072	0.047	0.11	0.047			0.034	60	0.04	5
AABA	alpha-Aminobutyric acid	Amino Acid Related	14	17	13	28	13	22	9.1	6.3	100	0.435	5
Ac-Orn	Acetylornithine	Amino Acid Related									0	0.065	5
ADMA	Asymmetric dimethylarginine	Amino Acid Related	0.47	0.48	0.44	0.56	0.45	0.52	0.069	0.047	100	0.08	5
alpha-AAA	alpha-Aminoadipic acid	Amino Acid Related	0.54	0.62	0.43	0.94	0.43	0.85	0.42	0.22	100	0.3	5
Anserine	L-Anserine	Amino Acid Related			0.034	0.034					20	0.01	5
BABA	beta-Aminobutyric acid	Amino Acid Related									0	0.03	5
Betaine	Betaine	Amino Acid Related	35	35	28	43	28	42	13	6.7	100	0.2	5
c4-OH-Pro	cis-4-Hydroxyproline	Amino Acid Related									0	0.3	5
Carnosine	Carnosine	Amino Acid Related									0	0.2	5
Cit	Citrulline	Amino Acid Related	30	29	26	32	27	31	4.7	2.5	100	1	5
Creatinine	Creatinine	Amino Acid Related	70	72	65	84	67	79	12	7.5	100	3.85	5
Cystine	Cystine	Amino Acid Related	39	38	23	61	23	51	28	15	100	0.07489	5
DOPA	Dihydroxyphenylalanine	Amino Acid Related	0.037	0.037	0.037	0.037				0.0002	40	0.148	5
HArg	Homoarginine	Amino Acid Related	4.4	3.9	2.1	5.3	2.7	5	2.3	1.3	100	0.01	5
HCys	Homocysteine	Amino Acid Related	4.7	4.8	4.1	5.5	4.2	5.4	1.2	0.6	100	0.266	5
Kynurenine	Kynurenine	Amino Acid Related	1.3	1.5	1.1	2.4	1.2	2	0.84	0.51	100	0.2265	5
Met-SO	Methionine-Sulfoxide	Amino Acid Related	0.55	0.56	0.29	0.92	0.37	0.75	0.39	0.23	100	0.1	5
Nitro-Tyr	Nitrotyrosine	Amino Acid Related									0	0.3	5
Orn	Ornithine	Amino Acid Related	76	80	67	108	69	93	25	16	100	1	5
PAG	Phenylacetylglycine	Amino Acid Related			0.013	0.013					20	0.01	5
PheAlaBetaine	Phenylalanine betaine	Amino Acid Related									0	0.01	5
ProBetaine	Proline betaine	Amino Acid Related	4.5	4.9	0.21	11	1.2	8.8	7.7	4.3	100	0.061	5
Sarcosine	Sarcosine	Amino Acid Related	4	5.1	3.3	10	3.5	7.3	3.8	2.9	100	0.1855	5
SDMA	Symmetric dimethylarginine	Amino Acid Related	0.51	0.49	0.42	0.53	0.43	0.52	0.088	0.048	100	0.02	5
t4-OH-Pro	trans-4-Hydroxyproline	Amino Acid Related	9.3	10	7.2	15	7.7	14	5.9	3.1	100	0.382	5
Taurine	Taurine	Amino Acid Related	52	55	47	66	48	63	15	8	100	0.363	5
TrpBetaine	Tryptophan betaine	Amino Acid Related	0.25	0.34	0.21	0.59	0.22	0.5	0.28	0.16	100	0.00811	5
Ala	Alanine	Amino Acids	354	418	335	557	344	525	181	100	100	2.4075	5
Arg	Arginine	Amino Acids	65	72	57	88	60	87	27	14	100	0.987	5
Asn	Asparagine	Amino Acids	47	51	41	65	43	62	18	9.7	100	0.5225	5
Asp	Aspartic Acid	Amino Acids	4.5	4.5	3.2	5.7	3.5	5.5	2.1	1.1	80	1.0305	5
Cys	Cysteine	Amino Acids	65	64	52	72	57	71	14	8	100	0.1	5
Gln	Glutamine	Amino Acids	685	661	562	713	603	706	103	61	100	3.45	5
Glu	Glutamic Acid	Amino Acids	50	53	23	77	36	71	35	20	100	2.662	5
Gly	Glycine	Amino Acids	332	313	241	344	277	340	63	42	100	4.7	5
His	Histidine	Amino Acids	98	98	85	105	92	104	12	7.7	100	1.1	5
Ile	Isoleucine	Amino Acids	73	70	58	83	58	81	22	11	100	0.759	5
Leu	Leucine	Amino Acids	121	122	100	142	103	140	37	19	100	1.095	5
Lys	Lysine	Amino Acids	171	173	159	186	161	185	25	12	100	1.4	5
Met	Methionine	Amino Acids	28	30	26	37	26	36	10	5.4	100	0.8055	5
Phe	Phenylalanine	Amino Acids	59	59	51	66	53	65	12	6.1	100	0.8685	5
Pro	Proline	Amino Acids	193	192	144	245	146	239	93	47	100	2.07	5
Ser	Serine	Amino Acids	106	110	84	147	85	137	51	27	100	1.55	5
Thr	Threonine	Amino Acids	170	163	120	190	137	187	50	28	100	0.9225	5
Trp	Tryptophan	Amino Acids	50	55	48	65	49	63	14	7.5	100	0.792	5
Tyr	Tyrosine	Amino Acids	81	81	70	90	74	87	13	7.6	100	0.4925	5
Val	Valine	Amino Acids	210	208	182	244	188	228	40	23	100	1.048	5
CA	Cholic Acid	Bile Acids	0.36	0.36	0.056	0.97	0.067	0.66	0.6	0.37	100	0.003	5
CDCA	Chenodeoxycholic acid	Bile Acids	0.21	0.3	0.078	0.68	0.079	0.59	0.52	0.28	80	0.02	5
DCA	Deoxycholic acid	Bile Acids	0.24	0.24	0.038	0.43	0.098	0.38	0.28	0.15	100	0.0081	5
GCA	Glycocholic acid	Bile Acids	0.15	0.19	0.053	0.52	0.063	0.34	0.28	0.19	100	0.00429	5
GCDCA	Glycochenodeoxycholic acid	Bile Acids	0.23	0.46	0.14	1.4	0.18	0.87	0.69	0.54	100	0.002	5
GDCA	Glycodeoxycholic acid	Bile Acids	0.17	0.16	0.023	0.26	0.07	0.26	0.19	0.099	100	0.0016736	5
GLCA	Glycolithocholic acid	Bile Acids	0.0072	0.0087	0.0061	0.012	0.0062	0.012	0.0057	0.003	100	0.003565	5
GLCAS	Glycolithocholic acid sulfate	Bile Acids	0.32	0.25	0.098	0.4	0.11	0.37	0.26	0.14	100	0.0034	5
GUDCA	Glycoursodeoxycholic acid	Bile Acids	0.048	0.067	0.0097	0.19	0.015	0.13	0.11	0.073	100	0.0019	5
TCA	Taurocholic acid	Bile Acids	0.0095	0.024	0.0075	0.055	0.0075			0.027	60	0.005	5
TCDCA	Taurochenodeoxycholic acid	Bile Acids	0.03	0.052	0.02	0.12	0.025	0.091	0.067	0.041	100	0.004085	5
TDCA	Taurodeoxycholic acid	Bile Acids	0.011	0.018	0.009	0.03	0.0097	0.029	0.019	0.01	100	0.004	5
TLCA	Taurolithocholic acid	Bile Acids			0.0013	0.0013					20	0.002	5
TMCA	Tauro-muricholic acids	Bile Acids	0.0062	0.0086	0.0059	0.016	0.0059	0.012	0.0066	0.0045	100	0.002	5
beta-Ala	beta-Alanine	Biogenic Amines	2.3	2.2	1.8	2.6	1.9	2.6	0.68	0.34	100	0.11	5
Dopamine	Dopamine	Biogenic Amines									0	0.2315	5
GABA	gamma-Aminobutyric acid	Biogenic Amines	0.19	0.17	0.12	0.22	0.13	0.21	0.083	0.043	100	0.04652	5
Histamine	Histamine	Biogenic Amines									0	0.429	5
PEA	Phenylethylamine	Biogenic Amines									0	0.001	5
Putrescine	Putrescine	Biogenic Amines	0.12	0.1	0.062	0.13	0.062			0.037	60	0.0624	5
Serotonin	Serotonin	Biogenic Amines	0.14	0.15	0.047	0.29	0.069	0.25	0.18	0.1	80	0.04	5
Spermidine	Spermidine	Biogenic Amines	0.14	0.14	0.12	0.16				0.029	40	0.2	5
Spermine	Spermine	Biogenic Amines			0.23	0.23					20	0.2	5
Hexose	Hexose	Carbohydrates and Related	3995	4462	3862	5622	3906	5252	1347	769	100	88.1885	5
AconAcid	Aconitic acid	Carboxylic Acids	7.3	7.9	5.7	12	6.3	9.9	3.6	2.4	100	0.2667	5
DiCA(12:0)	Dodecanedioic acid	Carboxylic Acids									0	0.1595	5
DiCA(14:0)	Tetradecanedioic acid	Carboxylic Acids									0	0.09969	5
HipAcid	Hippuric acid	Carboxylic Acids	3.4	8.9	2.5	31	2.9	18	15	12	100	0.5	5
Lac	Lactic acid	Carboxylic Acids	3127	3816	2917	5946	2963	5013	2051	1279	100	143.401	5
OH-GlutAcid	Hydroxyglutaric acid	Carboxylic Acids									0	6.942	5
Suc	Succinic acid	Carboxylic Acids									0	20.851	5
Cer d16:1/18:0	Ceramide d16:1/18:0	Ceramides	0.077	0.071	0.047	0.089	0.054	0.084	0.03	0.017	100	0.025875	5
Cer d16:1/20:0	Ceramide d16:1/20:0	Ceramides	0.09	0.084	0.035	0.11	0.056	0.11	0.052	0.03	100	0.01891	5
Cer d16:1/22:0	Ceramide d16:1/22:0	Ceramides	0.27	0.27	0.17	0.39	0.21	0.34	0.14	0.08	100	0.0694	5
Cer d16:1/23:0	Ceramide d16:1/23:0	Ceramides	0.15	0.14	0.039	0.18	0.088	0.18	0.096	0.06	100	0.033	5
Cer d16:1/24:0	Ceramide d16:1/24:0	Ceramides	0.2	0.19	0.14	0.26	0.15	0.24	0.086	0.046	100	0.01336	5
Cer d18:1/14:0	Ceramide d18:1/14:0	Ceramides	0.089	0.097	0.072	0.14	0.073	0.13	0.054	0.029	80	0.04241	5
Cer d18:1/16:0	Ceramide d18:1/16:0	Ceramides	0.44	0.45	0.34	0.59	0.39	0.52	0.13	0.089	100	0.011415	5
Cer d18:1/18:0	Ceramide d18:1/18:0	Ceramides	0.15	0.16	0.1	0.23	0.11	0.21	0.092	0.051	100	0.00978	5
Cer d18:1/18:0-OH	Ceramide d18:1/18:0-OH	Ceramides	0.32	0.32	0.07	0.56				0.35	40	0.2945	5
Cer d18:1/18:1	Ceramide d18:1/18:1	Ceramides	0.026	0.024	0.019	0.028	0.019			0.0046	60	0.0271351	5
Cer d18:1/20:0	Ceramide d18:1/20:0	Ceramides	0.11	0.11	0.083	0.14	0.09	0.13	0.038	0.022	100	0.007175	5
Cer d18:1/20:0-OH	Ceramide d18:1/20:0-OH	Ceramides	0.45	0.67	0.27	1.3	0.27			0.54	60	0.239	5
Cer d18:1/22:0	Ceramide d18:1/22:0	Ceramides	0.74	0.75	0.65	0.84	0.69	0.83	0.14	0.079	100	0.010545	5
Cer d18:1/23:0	Ceramide d18:1/23:0	Ceramides	0.83	0.78	0.51	0.9	0.64	0.88	0.24	0.15	100	0.012515	5
Cer d18:1/24:0	Ceramide d18:1/24:0	Ceramides	2.1	2.1	1.7	2.3	1.8	2.3	0.48	0.27	100	0.02399	5
Cer d18:1/24:1	Ceramide d18:1/24:1	Ceramides	0.95	0.93	0.61	1.2	0.76	1.1	0.32	0.2	100	0.011975	5
Cer d18:1/25:0	Ceramide d18:1/25:0	Ceramides	0.38	0.35	0.23	0.39	0.29	0.39	0.1	0.067	100	0.066815	5
Cer d18:1/26:0	Ceramide d18:1/26:0	Ceramides	0.083	0.086	0.064	0.11	0.069	0.1	0.036	0.02	80	0.024	5
Cer d18:1/26:1	Ceramide d18:1/26:1	Ceramides	0.022	0.022	0.017	0.025	0.019	0.024	0.0045	0.0029	100	0.0119	5
Cer d18:2/14:0	Ceramide d18:2/14:0	Ceramides									0	0.01116	5
Cer d18:2/16:0	Ceramide d18:2/16:0	Ceramides	0.091	0.092	0.074	0.12	0.078	0.11	0.03	0.018	100	0.049	5
Cer d18:2/18:0	Ceramide d18:2/18:0	Ceramides	0.066	0.072	0.049	0.11	0.05	0.1	0.051	0.027	80	0.029	5
Cer d18:2/18:1	Ceramide d18:2/18:1	Ceramides									0	0.01462	5
Cer d18:2/20:0	Ceramide d18:2/20:0	Ceramides	0.051	0.05	0.032	0.066	0.037	0.062	0.025	0.013	100	0.025	5
Cer d18:2/22:0	Ceramide d18:2/22:0	Ceramides	0.23	0.22	0.17	0.27	0.18	0.25	0.069	0.038	100	0.011245	5
Cer d18:2/23:0	Ceramide d18:2/23:0	Ceramides	0.12	0.11	0.09	0.14	0.091	0.14	0.044	0.022	100	0.041	5
Cer d18:2/24:0	Ceramide d18:2/24:0	Ceramides	0.37	0.41	0.3	0.58	0.33	0.5	0.17	0.11	100	0.00689	5
Cer d18:2/24:1	Ceramide d18:2/24:1	Ceramides	0.16	0.16	0.12	0.24	0.13	0.2	0.076	0.046	100	0.005	5
CE 14:0	Cholesteryl ester 14:0	Cholesteryl Esters	13	14	9	17	11	17	6.1	3.3	100	0.3075	5
CE 14:1	Cholesteryl ester 14:1	Cholesteryl Esters	0.078	0.3	0.062	0.76	0.062			0.4	60	0.144	5
CE 15:0	Cholesteryl ester 15:0	Cholesteryl Esters	4.2	5.1	4	8.1	4.1	7.1	3.1	2	80	1.39	5
CE 15:1	Cholesteryl ester 15:1	Cholesteryl Esters	0.63	0.63	0.57	0.68				0.08	40	0.507	5
CE 16:0	Cholesteryl ester 16:0	Cholesteryl Esters	185	191	144	268	152	233	81	48	100	0.938	5
CE 16:1	Cholesteryl ester 16:1	Cholesteryl Esters	37	38	22	55	26	50	24	13	100	9.92	5
CE 17:0	Cholesteryl ester 17:0	Cholesteryl Esters	4.3	4.7	3.3	6.8	3.5	6.2	2.7	1.5	80	1.25	5
CE 17:1	Cholesteryl ester 17:1	Cholesteryl Esters	2.8	3.1	2.2	4.9	2.4	3.9	1.6	1.1	100	1.06	5
CE 18:0	Cholesteryl ester 18:0	Cholesteryl Esters	13	13	10	18	11	15	4.3	2.8	100	0.29215	5
CE 18:1	Cholesteryl ester 18:1	Cholesteryl Esters	267	270	200	359	219	321	102	59	100	1.3125	5
CE 18:2	Cholesteryl ester 18:2	Cholesteryl Esters	1336	1326	916	1813	1021	1626	605	338	100	14.28	5
CE 18:3	Cholesteryl ester 18:3	Cholesteryl Esters	68	61	35	73	46	72	25	16	100	0.226	5
CE 20:0	Cholesteryl ester 20:0	Cholesteryl Esters	3.3	3.3	2.2	4.3				1.5	40	4.413	5
CE 20:1	Cholesteryl ester 20:1	Cholesteryl Esters	0.6	1.5	0.48	3.5	0.48			1.7	60	0.618	5
CE 20:3	Cholesteryl ester 20:3	Cholesteryl Esters	24	25	18	33	18	31	13	6.7	100	0.183	5
CE 20:4	Cholesteryl ester 20:4	Cholesteryl Esters	271	285	185	439	217	361	144	94	100	0.549	5
CE 20:5	Cholesteryl ester 20:5	Cholesteryl Esters	42	52	28	96	32	78	47	27	100	0.4255	5
CE 22:0	Cholesteryl ester 22:0	Cholesteryl Esters									0	0.108	5
CE 22:1	Cholesteryl ester 22:1	Cholesteryl Esters			0.18	0.18					20	0.147	5
CE 22:2	Cholesteryl ester 22:2	Cholesteryl Esters	0.14	0.14	0.12	0.16				0.029	40	0.169	5
CE 22:5	Cholesteryl ester 22:5	Cholesteryl Esters	2.5	2.7	1.7	3.9	1.9	3.6	1.7	0.92	100	0.88	5
CE 22:6	Cholesteryl ester 22:6	Cholesteryl Esters	37	39	26	63	29	51	21	14	100	0.3	5
p-Cresol-SO4	p-Cresol sulfate	Cresols	37	37	24	45	30	45	14	8.3	100	0.01	5
DG 14:0_14:0	Diacylglyceride 14:0_14:0	Diglycerides									0	0.3475	5
DG 14:0_18:1	Diacylglyceride 14:0_18:1	Diglycerides									0	0.6975	5
DG 14:0_18:2	Diacylglyceride 14:0_18:2	Diglycerides	0.42	0.42	0.4	0.45				0.034	40	0.334	5
DG 14:0_20:0	Diacylglyceride 14:0_20:0	Diglycerides	0.0006	0.0006	0.0006	0.0006				2e-05	40	0.0698	5
DG 14:1_18:1	Diacylglyceride 14:1_18:1	Diglycerides			0.091	0.091					20	0.09721	5
DG 14:1_20:2	Diacylglyceride 14:1_20:2	Diglycerides			0.03	0.03					20	0.1135	5
DG 16:0_16:0	Diacylglyceride 16:0_16:0	Diglycerides									0	23.3	5
DG 16:0_16:1	Diacylglyceride 16:0_16:1	Diglycerides									0	0.2565	5
DG 16:0_18:1	Diacylglyceride 16:0_18:1	Diglycerides	2.3	2.4	1.6	3.3	1.8	3	1.3	0.69	80	0.573	5
DG 16:0_18:2	Diacylglyceride 16:0_18:2	Diglycerides	1.2	1.4	0.78	2	1	2	0.96	0.52	100	0.48	5
DG 16:0_20:0	Diacylglyceride 16:0_20:0	Diglycerides									0	0.9455	5
DG 16:0_20:3	Diacylglyceride 16:0_20:3	Diglycerides			0.12	0.12					20	0.1155	5
DG 16:0_20:4	Diacylglyceride 16:0_20:4	Diglycerides	0.26	0.26	0.23	0.28				0.037	40	0.189	5
DG 16:1_18:0	Diacylglyceride 16:1_18:0	Diglycerides									0	0.125	5
DG 16:1_18:1	Diacylglyceride 16:1_18:1	Diglycerides	1.4	1.6	1.4	1.9	1.4			0.28	60	0.4415	5
DG 16:1_18:2	Diacylglyceride 16:1_18:2	Diglycerides	0.5	0.53	0.27	0.83	0.31	0.77	0.46	0.24	80	0.151	5
DG 16:1_20:0	Diacylglyceride 16:1_20:0	Diglycerides									0	0.234	5
DG 17:0_17:1	Diacylglyceride 17:0_17:1	Diglycerides	0.08	0.08	0.069	0.09				0.015	40	0.107	5
DG 17:0_18:1	Diacylglyceride 17:0_18:1	Diglycerides	0.59	0.55	0.4	0.64	0.44	0.64	0.2	0.11	80	0.188	5
DG 18:0_20:0	Diacylglyceride 18:0_20:0	Diglycerides	0.031	0.031	0.028	0.035				0.0052	40	0.417	5
DG 18:0_20:4	Diacylglyceride 18:0_20:4	Diglycerides			0.12	0.12					20	0.1225	5
DG 18:1_18:1	Diacylglyceride 18:1_18:1	Diglycerides	2	1.9	0.81	3	1.1	2.7	1.6	0.86	100	0.516	5
DG 18:1_18:2	Diacylglyceride 18:1_18:2	Diglycerides	5.9	5.7	3.1	7.8	4.1	7.3	3.2	1.8	100	1.63	5
DG 18:1_18:3	Diacylglyceride 18:1_18:3	Diglycerides			1	1					20	0.339	5
DG 18:1_18:4	Diacylglyceride 18:1_18:4	Diglycerides									0	0.17015	5
DG 18:1_20:0	Diacylglyceride 18:1_20:0	Diglycerides			0.32	0.32					20	0.271	5
DG 18:1_20:1	Diacylglyceride 18:1_20:1	Diglycerides									0	0.0322042	5
DG 18:1_20:2	Diacylglyceride 18:1_20:2	Diglycerides			0.29	0.29					20	0.119	5
DG 18:1_20:3	Diacylglyceride 18:1_20:3	Diglycerides	0.07	0.07	0.064	0.077				0.0091	40	0.07755	5
DG 18:1_20:4	Diacylglyceride 18:1_20:4	Diglycerides									0	0.185	5
DG 18:1_22:5	Diacylglyceride 18:1_22:5	Diglycerides	0.0084	0.0084	0.008	0.0088				0.0006	40	0.0133982	5
DG 18:1_22:6	Diacylglyceride 18:1_22:6	Diglycerides	0.16	0.16	0.15	0.17				0.0091	40	0.29595	5
DG 18:2_18:2	Diacylglyceride 18:2_18:2	Diglycerides	4.6	4.5	2.5	6.1	3.2	5.7	2.5	1.4	100	0.605	5
DG 18:2_18:3	Diacylglyceride 18:2_18:3	Diglycerides	0.58	0.58	0.47	0.69	0.47			0.11	60	0.152	5
DG 18:2_18:4	Diacylglyceride 18:2_18:4	Diglycerides									0	0.1419	5
DG 18:2_20:0	Diacylglyceride 18:2_20:0	Diglycerides									0	0.122	5
DG 18:2_20:4	Diacylglyceride 18:2_20:4	Diglycerides	0.17	0.17	0.16	0.17				0.012	40	0.1805	5
DG 18:3_18:3	Diacylglyceride 18:3_18:3	Diglycerides									0	0.1605	5
DG 18:3_20:2	Diacylglyceride 18:3_20:2	Diglycerides									0	0.176	5
DG 21:0_22:6	Diacylglyceride 21:0_22:6	Diglycerides									0	0.407	5
DG 22:1_22:2	Diacylglyceride 22:1_22:2	Diglycerides			0.0011	0.0011					20	0.1235	5
DG O-14:0_18:2	Diacylglyceride O-14:0_18:2	Diglycerides									0	0.804	5
DG O-16:0_18:1	Diacylglyceride O-16:0_18:1	Diglycerides									0	0.1255	5
DG O-16:0_20:4	Diacylglyceride O-16:0_20:4	Diglycerides									0	0.0461062	3
DG O-18:2_18:2	Diacylglyceride O-18:2_18:2	Diglycerides			0.061	0.061					50	0.0829	2
Hex2Cer d18:1/14:0	Dihexosylceramide d18:1/14:0	Dihexosylceramides	0.24	0.26	0.19	0.39	0.21	0.32	0.1	0.075	100	0.0259557	5
Hex2Cer d18:1/16:0	Dihexosylceramide d18:1/16:0	Dihexosylceramides	2.7	2.8	2.2	3.6	2.3	3.2	0.88	0.53	100	0.01082	5
Hex2Cer d18:1/18:0	Dihexosylceramide d18:1/18:0	Dihexosylceramides	0.22	0.22	0.15	0.29	0.17	0.27	0.1	0.054	100	0.0339	5
Hex2Cer d18:1/20:0	Dihexosylceramide d18:1/20:0	Dihexosylceramides	0.1	0.092	0.044	0.13	0.061	0.12	0.058	0.033	100	0.105	5
Hex2Cer d18:1/22:0	Dihexosylceramide d18:1/22:0	Dihexosylceramides	0.23	0.21	0.17	0.25	0.18	0.24	0.063	0.033	100	0.077	5
Hex2Cer d18:1/24:0	Dihexosylceramide d18:1/24:0	Dihexosylceramides	0.18	0.19	0.13	0.25	0.14	0.24	0.11	0.053	100	0.133	5
Hex2Cer d18:1/24:1	Dihexosylceramide d18:1/24:1	Dihexosylceramides	0.41	0.34	0.17	0.44	0.23	0.43	0.2	0.12	100	0.003615	5
Hex2Cer d18:1/26:0	Dihexosylceramide d18:1/26:0	Dihexosylceramides	0.014	0.014	0.01	0.018				0.0052	40	0.006	5
Hex2Cer d18:1/26:1	Dihexosylceramide d18:1/26:1	Dihexosylceramides	0.014	0.019	0.012	0.032	0.012			0.011	60	0.606	5
Cer d18:0/18:0	Dihydroceramide d18:0/18:0	Dihydroceramides	0.024	0.024	0.023	0.025				0.0013	40	0.03455	5
Cer d18:0/18:0-OH	Dihydroceramide d18:0/18:0-OH	Dihydroceramides			0.38	0.38					20	0.00583	5
Cer d18:0/20:0	Dihydroceramide d18:0/20:0	Dihydroceramides	0.0018	0.0018	0.0016	0.002				0.0003	40	0.07019	5
Cer d18:0/22:0	Dihydroceramide d18:0/22:0	Dihydroceramides	0.25	0.2	0.11	0.26	0.11			0.085	60	0.097	5
Cer d18:0/24:0	Dihydroceramide d18:0/24:0	Dihydroceramides	0.32	0.3	0.22	0.37	0.23	0.35	0.12	0.062	100	0.093	5
Cer d18:0/24:1	Dihydroceramide d18:0/24:1	Dihydroceramides	0.18	0.19	0.14	0.28	0.16	0.24	0.078	0.051	100	0.402	5
Cer d18:0/26:1	Dihydroceramide d18:0/26:1	Dihydroceramides			0.032	0.032					20	0.8	5
Cer d18:0/26:1-OH	Dihydroceramide d18:0/26:1-OH	Dihydroceramides	1.5	1.5	1.4	1.6				0.18	40	0.035385	5
FA 12:0	Dodecanoic acid	Fatty Acids									0	228.567	5
FA 14:0	Myristic acid	Fatty Acids									0	738.192	5
FA 16:0	Palmitic acid	Fatty Acids									0	690.389	5
FA 18:0	Stearic acid	Fatty Acids									0	64	5
FA 18:1	Octadecenoic acid	Fatty Acids	171	154	89	238	94	206	112	61	100	3.4155	5
FA 18:2	Octadecadienoic acid	Fatty Acids	55	64	21	135	30	102	72	44	100	0.515	5
FA 20:1	Eicosenoic acid	Fatty Acids	1.5	2	1	4	1.1	3.1	2	1.2	100	0.6955	5
FA 20:2	Eicosadienoic acid	Fatty Acids	1.3	1.3	0.59	2	0.83	1.9	1	0.56	100	0.25	5
FA 20:3	Eicosatrienoic acid	Fatty Acids	0.8	0.85	0.77	0.98	0.77			0.11	60	0.0123	5
FA 20:4	Arachidonic acid	Fatty Acids	5.1	5.4	4.6	6.8	4.7	6.4	1.7	0.95	80	1.681	5
FA 20:5	Eicosapentaenoic acid	Fatty Acids	0.4	0.55	0.35	1.1	0.36	0.9	0.54	0.34	80	16.493	5
FA 22:6	Docosahexaenoic acid	Fatty Acids	5.2	5.7	1.6	11	2.4	9.3	6.9	3.7	100	0.117	5
Hex-Cer d16:1/20:0	Hexosylceramide d16:1/20:0	Hexosylceramides	0.021	0.021	0.017	0.025				0.006	100	0.017	2
Hex-Cer d16:1/22:0	Hexosylceramide d16:1/22:0	Hexosylceramides	0.05	0.051	0.039	0.065	0.041	0.062	0.02	0.011	80	0.0148	5
Hex-Cer d16:1/24:0	Hexosylceramide d16:1/24:0	Hexosylceramides	0.041	0.04	0.032	0.047	0.034	0.046	0.011	0.0061	80	0.02585	5
Hex-Cer d18:1/14:0	Hexosylceramide d18:1/14:0	Hexosylceramides	0.031	0.031	0.025	0.038				0.0094	40	0.0198	5
Hex-Cer d18:1/16:0	Hexosylceramide d18:1/16:0	Hexosylceramides	1.1	1.1	0.84	1.3	0.93	1.3	0.36	0.2	100	0.0707	5
Hex-Cer d18:1/18:0	Hexosylceramide d18:1/18:0	Hexosylceramides	0.19	0.2	0.14	0.26	0.16	0.24	0.081	0.044	100	0.0319	5
Hex-Cer d18:1/18:1	Hexosylceramide d18:1/18:1	Hexosylceramides	0.089	0.082	0.054	0.11	0.057	0.1	0.047	0.024	100	0.103	5
Hex-Cer d18:1/20:0	Hexosylceramide d18:1/20:0	Hexosylceramides	0.21	0.23	0.17	0.28	0.19	0.28	0.094	0.049	100	0.03776	5
Hex-Cer d18:1/22:0	Hexosylceramide d18:1/22:0	Hexosylceramides	3.5	3.2	2.2	3.8	2.6	3.7	1.1	0.63	100	0.03923	5
Hex-Cer d18:1/23:0	Hexosylceramide d18:1/23:0	Hexosylceramides	1.8	1.7	1	2.3	1.3	2.1	0.85	0.48	100	0.023905	5
Hex-Cer d18:1/24:0	Hexosylceramide d18:1/24:0	Hexosylceramides	1.7	1.8	1.1	2.3	1.4	2.2	0.78	0.44	100	0.1495	5
Hex-Cer d18:1/24:1	Hexosylceramide d18:1/24:1	Hexosylceramides	3.5	3.8	2.1	5.5	2.8	4.9	2.1	1.2	100	0.03788	5
Hex-Cer d18:1/26:0	Hexosylceramide d18:1/26:0	Hexosylceramides	0.055	0.055	0.039	0.071				0.023	40	0.050635	5
Hex-Cer d18:1/26:1	Hexosylceramide d18:1/26:1	Hexosylceramides	0.078	0.078	0.063	0.092				0.021	40	0.009915	5
Hex-Cer d18:2/16:0	Hexosylceramide d18:2/16:0	Hexosylceramides	0.013	0.026	0.0075	0.057	0.0075			0.027	60	0.01368	5
Hex-Cer d18:2/18:0	Hexosylceramide d18:2/18:0	Hexosylceramides	0.029	0.028	0.021	0.034	0.023	0.033	0.0097	0.0053	80	0.014665	5
Hex-Cer d18:2/20:0	Hexosylceramide d18:2/20:0	Hexosylceramides									0	0.176	5
Hex-Cer d18:2/22:0	Hexosylceramide d18:2/22:0	Hexosylceramides	0.49	0.48	0.35	0.59	0.41	0.54	0.13	0.086	100	0.0856	5
Hex-Cer d18:2/23:0	Hexosylceramide d18:2/23:0	Hexosylceramides	0.29	0.3	0.21	0.45	0.23	0.38	0.15	0.09	100	0.333	5
Hex-Cer d18:2/24:0	Hexosylceramide d18:2/24:0	Hexosylceramides	0.74	0.73	0.58	0.86	0.59	0.86	0.27	0.15	80	0.01	5
AbsAcid	Abscisic acid	Hormones and Related									0	0.05813	5
Cortisol	Cortisol	Hormones and Related	0.15	0.19	0.11	0.39	0.12	0.29	0.17	0.12	100	0.06498	5
Cortisone	Cortisone	Hormones and Related									0	0.0851258	5
DHEAS	Dehydroepiandrosterone sulfate	Hormones and Related	2.6	2.8	0.82	5.1	1.3	4.4	3.1	1.7	100	0.018	5
3-IAA	Indoleacetic acid	Indoles and Derivatives	1.2	1.2	0.92	1.7	1.1	1.5	0.41	0.26	100	0.0625	5
3-IPA	Indolepropionic acid	Indoles and Derivatives	1	1.4	0.65	2.8	0.75	2.2	1.5	0.87	100	0.0110957	5
Indole	Indole	Indoles and Derivatives									0	12.1905	5
Ind-SO4	Indoxyl sulfate	Indoles and Derivatives	3.9	3.9	1.3	6.4	1.7	6.1	4.4	2.2	100	78	5
LPC 14:0	Lysophosphatidylcholine 14:0	Lysophosphatidylcholines	5.9	5.9	4.8	6.9				1.5	40	0.2525	5
LPC 16:0	Lysophosphatidylcholine 16:0	Lysophosphatidylcholines	85	84	58	100	70	96	26	16	100	0.079	5
LPC 16:1	Lysophosphatidylcholine 16:1	Lysophosphatidylcholines	1.8	2.2	1.3	3.2	1.4	3.1	1.7	0.9	100	0.04279	5
LPC 17:0	Lysophosphatidylcholine 17:0	Lysophosphatidylcholines	1.5	1.6	1.1	2.5	1.3	2.1	0.82	0.51	100	0.4095	5
LPC 18:0	Lysophosphatidylcholine 18:0	Lysophosphatidylcholines	28	29	20	38	24	34	10	6.6	100	0.142	5
LPC 18:1	Lysophosphatidylcholine 18:1	Lysophosphatidylcholines	18	17	11	22	14	21	7.1	4	100	0.214	5
LPC 18:2	Lysophosphatidylcholine 18:2	Lysophosphatidylcholines	30	30	23	37	24	35	11	5.9	100	0.156	5
LPC 20:3	Lysophosphatidylcholine 20:3	Lysophosphatidylcholines	1.7	1.7	1.1	2.4	1.3	2.1	0.8	0.49	100	0.058535	5
LPC 20:4	Lysophosphatidylcholine 20:4	Lysophosphatidylcholines	8.4	7	3.5	9.1	4.5	8.9	4.4	2.4	100	0.0727	5
LPC 24:0	Lysophosphatidylcholine 24:0	Lysophosphatidylcholines	0.17	0.16	0.088	0.23	0.1	0.22	0.11	0.059	80	0.0895	5
LPC 26:0	Lysophosphatidylcholine 26:0	Lysophosphatidylcholines	0.17	0.18	0.16	0.2	0.16			0.021	60	0.0619	5
LPC 26:1	Lysophosphatidylcholine 26:1	Lysophosphatidylcholines	0.18	0.17	0.11	0.23	0.12	0.22	0.096	0.05	80	0.166	5
Hypoxanthine	Hypoxanthine	Nucleobases and Related	3	2.8	1	4	1.3	4	2.7	1.5	80	0.4	5
Xanthine	Xanthine	Nucleobases and Related	0.56	0.56	0.52	0.6				0.053	40	0.03922	5
PC 24:0	Phosphatidylcholine 24:0	Phosphatidylcholines	0.069	0.069	0.069	0.07				0.0005	40	0.8725	5
PC 26:0	Phosphatidylcholine 26:0	Phosphatidylcholines									0	0.03336	5
PC 28:1	Phosphatidylcholine 28:1	Phosphatidylcholines	3.6	3.4	2.6	3.8	3	3.8	0.8	0.49	100	0.122	5
PC 30:0	Phosphatidylcholine 30:0	Phosphatidylcholines	3.4	3.1	2.3	3.4	2.5	3.4	0.88	0.49	100	0.02949	5
PC 30:2	Phosphatidylcholine 30:2	Phosphatidylcholines			0.14	0.14					33	0.0151042	3
PC 32:0	Phosphatidylcholine 32:0	Phosphatidylcholines	11	11	8	14	8.7	13	4.5	2.3	100	0.48	5
PC 32:1	Phosphatidylcholine 32:1	Phosphatidylcholines	7.4	7.3	3.6	12	4.2	10	6.2	3.4	100	0.00633	5
PC 32:2	Phosphatidylcholine 32:2	Phosphatidylcholines	2.7	2.9	2	4	2.1	3.7	1.6	0.85	100	0.096345	5
PC 32:3	Phosphatidylcholine 32:3	Phosphatidylcholines	0.53	0.55	0.45	0.72	0.47	0.64	0.18	0.11	100	0.174	5
PC 34:1	Phosphatidylcholine 34:1	Phosphatidylcholines	121	124	92	171	97	153	56	31	100	0.061205	5
PC 34:2	Phosphatidylcholine 34:2	Phosphatidylcholines	311	299	232	333	267	326	58	39	100	0.0141726	5
PC 34:3	Phosphatidylcholine 34:3	Phosphatidylcholines	12	12	9.4	13	11	13	2.2	1.4	100	0.282	5
PC 34:4	Phosphatidylcholine 34:4	Phosphatidylcholines	1.6	1.6	1.1	2.5	1.2	2.1	0.91	0.54	100	0.04206	5
PC 36:0	Phosphatidylcholine 36:0	Phosphatidylcholines	1.5	1.5	0.76	2.6	0.8	2.1	1.3	0.73	100	0.1185	5
PC 36:1	Phosphatidylcholine 36:1	Phosphatidylcholines	31	34	29	43	29	40	11	6	100	0.05691	5
PC 36:2	Phosphatidylcholine 36:2	Phosphatidylcholines	194	191	170	223	173	209	36	21	100	0.083375	5
PC 36:3	Phosphatidylcholine 36:3	Phosphatidylcholines	103	99	87	110	88	108	20	10	100	0.027775	5
PC 36:4	Phosphatidylcholine 36:4	Phosphatidylcholines	169	165	119	220	133	197	64	37	100	0.00875	5
PC 36:5	Phosphatidylcholine 36:5	Phosphatidylcholines	12	15	8.3	28	9	21	12	8.1	100	0.97	5
PC 36:6	Phosphatidylcholine 36:6	Phosphatidylcholines	0.67	0.72	0.44	1.2	0.48	0.97	0.49	0.3	100	0.03304	5
PC 38:0	Phosphatidylcholine 38:0	Phosphatidylcholines	2.5	2.4	1.6	3.4	1.6	3.2	1.6	0.8	100	0.05754	5
PC 38:1	Phosphatidylcholine 38:1	Phosphatidylcholines	0.33	0.4	0.29	0.57	0.29			0.15	100	0.0385	3
PC 38:3	Phosphatidylcholine 38:3	Phosphatidylcholines	31	37	26	51	28	48	20	11	100	0.035	5
PC 38:4	Phosphatidylcholine 38:4	Phosphatidylcholines	105	104	65	129	81	127	46	26	100	0.4305	5
PC 38:5	Phosphatidylcholine 38:5	Phosphatidylcholines	37	41	26	56	31	55	24	13	100	0.016525	5
PC 38:6	Phosphatidylcholine 38:6	Phosphatidylcholines	54	56	37	80	41	71	30	17	100	0.19	5
PC 40:1	Phosphatidylcholine 40:1	Phosphatidylcholines									0	0.0192925	5
PC 40:2	Phosphatidylcholine 40:2	Phosphatidylcholines	0.27	0.23	0.12	0.33	0.13	0.31	0.17	0.092	100	0.033	5
PC 40:3	Phosphatidylcholine 40:3	Phosphatidylcholines	0.41	0.39	0.25	0.52	0.27	0.49	0.23	0.12	100	0.219	5
PC 40:4	Phosphatidylcholine 40:4	Phosphatidylcholines	2.6	2.8	1.6	4.2	2.1	3.6	1.5	0.92	100	0.0424	5
PC 40:5	Phosphatidylcholine 40:5	Phosphatidylcholines	6.3	6.8	4	10	5.1	8.8	3.7	2.3	100	0.01122	5
PC 40:6	Phosphatidylcholine 40:6	Phosphatidylcholines	21	20	12	25	16	23	6.5	4.6	100	0.119	5
PC 42:0	Phosphatidylcholine 42:0	Phosphatidylcholines	0.52	0.5	0.27	0.76	0.33	0.65	0.33	0.18	100	0.01136	5
PC 42:1	Phosphatidylcholine 42:1	Phosphatidylcholines	0.3	0.29	0.16	0.42	0.19	0.39	0.21	0.11	100	0.011	5
PC 42:2	Phosphatidylcholine 42:2	Phosphatidylcholines	0.18	0.22	0.12	0.36	0.15	0.31	0.16	0.093	100	0.17	5
PC 42:4	Phosphatidylcholine 42:4	Phosphatidylcholines	0.16	0.17	0.11	0.26	0.12	0.23	0.1	0.059	100	0.135	5
PC 42:5	Phosphatidylcholine 42:5	Phosphatidylcholines	0.23	0.23	0.16	0.32	0.18	0.28	0.1	0.061	100	0.033	5
PC 42:6	Phosphatidylcholine 42:6	Phosphatidylcholines	0.37	0.36	0.23	0.52	0.27	0.46	0.19	0.11	100	0.05	5
PC O-28:0	Phosphatidylcholine O-28:0	Phosphatidylcholines	0.31	0.31	0.31	0.31				0.004	40	0.13	5
PC O-28:1	Phosphatidylcholine O-28:1	Phosphatidylcholines	0.4	0.35	0.19	0.46	0.26	0.43	0.17	0.1	100	0.495	5
PC O-30:0	Phosphatidylcholine O-30:0	Phosphatidylcholines	0.3	0.31	0.24	0.41	0.26	0.37	0.11	0.063	100	0.00852	5
PC O-30:1	Phosphatidylcholine O-30:1	Phosphatidylcholines	0.2	0.2	0.17	0.24				0.054	40	0.026175	5
PC O-30:2	Phosphatidylcholine O-30:2	Phosphatidylcholines	0.1	0.1	0.071	0.13	0.085	0.12	0.033	0.02	100	0.015695	5
PC O-32:1	Phosphatidylcholine O-32:1	Phosphatidylcholines	2.2	2.6	2.1	3.6	2.1	3.3	1.2	0.7	100	0.01855	5
PC O-32:2	Phosphatidylcholine O-32:2	Phosphatidylcholines	0.66	0.76	0.5	1.3	0.56	1	0.45	0.33	100	0.017	5
PC O-34:0	Phosphatidylcholine O-34:0	Phosphatidylcholines	1	1.1	0.94	1.4	0.99	1.3	0.31	0.17	100	0.027135	5
PC O-34:1	Phosphatidylcholine O-34:1	Phosphatidylcholines	7.1	7.2	5.7	8.4	6.4	8.1	1.7	0.99	100	0.335	5
PC O-34:2	Phosphatidylcholine O-34:2	Phosphatidylcholines	12	12	8.3	15	9.2	14	4.9	2.7	100	2.82	5
PC O-34:3	Phosphatidylcholine O-34:3	Phosphatidylcholines	9.4	9.4	6.5	13	7.4	11	3.9	2.2	100	0.040903	5
PC O-36:0	Phosphatidylcholine O-36:0	Phosphatidylcholines	0.57	0.6	0.46	0.81	0.49	0.73	0.25	0.14	100	0.01898	5
PC O-36:1	Phosphatidylcholine O-36:1	Phosphatidylcholines	6.3	6	4.6	7.1	5	6.8	1.8	1	100	0.030305	5
PC O-36:2	Phosphatidylcholine O-36:2	Phosphatidylcholines	11	11	10	12	11	12	1.2	0.63	100	0.01406	5
PC O-36:3	Phosphatidylcholine O-36:3	Phosphatidylcholines	6.8	6.9	5.7	8.5	5.9	8	2	1.1	100	0.685	5
PC O-36:4	Phosphatidylcholine O-36:4	Phosphatidylcholines	16	18	14	25	15	21	6.1	4.1	100	0.0099198	5
PC O-36:5	Phosphatidylcholine O-36:5	Phosphatidylcholines	10	12	9.3	18	9.5	16	6.6	3.9	100	0.00937	5
PC O-38:0	Phosphatidylcholine O-38:0	Phosphatidylcholines	1.4	1.5	1.2	2.1	1.2	1.9	0.62	0.37	100	0.013125	5
PC O-38:1	Phosphatidylcholine O-38:1	Phosphatidylcholines	0.35	0.35	0.23	0.46	0.26	0.43	0.18	0.094	80	0.02148	5
PC O-38:2	Phosphatidylcholine O-38:2	Phosphatidylcholines	1.5	1.6	1.1	2.1	1.2	1.9	0.72	0.39	100	0.028935	5
PC O-38:3	Phosphatidylcholine O-38:3	Phosphatidylcholines	3.1	3.2	2.4	3.7	2.7	3.6	0.91	0.52	100	0.010565	5
PC O-38:4	Phosphatidylcholine O-38:4	Phosphatidylcholines	13	12	8.3	15	10	14	4	2.4	100	0.0110284	5
PC O-38:5	Phosphatidylcholine O-38:5	Phosphatidylcholines	16	16	12	20	14	19	5.5	3.2	100	0.017	5
PC O-38:6	Phosphatidylcholine O-38:6	Phosphatidylcholines	6.1	6.8	4.9	11	5.1	8.8	3.7	2.4	100	0.020575	5
PC O-40:1	Phosphatidylcholine O-40:1	Phosphatidylcholines	0.97	1.1	0.81	1.6	0.88	1.4	0.56	0.32	100	0.063	5
PC O-40:2	Phosphatidylcholine O-40:2	Phosphatidylcholines	1.4	1.4	1.2	1.7	1.2	1.6	0.35	0.2	100	0.014	5
PC O-40:3	Phosphatidylcholine O-40:3	Phosphatidylcholines	0.92	0.84	0.57	1	0.65	0.98	0.33	0.18	100	0.0194	5
PC O-40:4	Phosphatidylcholine O-40:4	Phosphatidylcholines	2.3	2.2	1.5	2.4	1.9	2.4	0.48	0.38	100	0.696	5
PC O-40:5	Phosphatidylcholine O-40:5	Phosphatidylcholines	3.2	3.1	2.1	3.5	2.6	3.5	0.88	0.56	100	0.08374	5
PC O-40:6	Phosphatidylcholine O-40:6	Phosphatidylcholines	4	3.8	2.5	4.5	3	4.4	1.4	0.81	100	0.02857	5
PC O-42:0	Phosphatidylcholine O-42:0	Phosphatidylcholines	0.5	0.5	0.44	0.56				0.08	40	0.01807	5
PC O-42:1	Phosphatidylcholine O-42:1	Phosphatidylcholines	0.38	0.35	0.19	0.48	0.23	0.45	0.21	0.11	100	0.167	5
PC O-42:2	Phosphatidylcholine O-42:2	Phosphatidylcholines	0.4	0.43	0.35	0.55	0.36	0.51	0.15	0.081	100	0.673	5
PC O-42:3	Phosphatidylcholine O-42:3	Phosphatidylcholines	0.59	0.67	0.44	0.98	0.48	0.9	0.42	0.22	100	0.06	5
PC O-42:4	Phosphatidylcholine O-42:4	Phosphatidylcholines	0.75	0.73	0.54	0.92	0.59	0.85	0.26	0.14	100	0.118	5
PC O-42:5	Phosphatidylcholine O-42:5	Phosphatidylcholines	1.6	1.6	1.1	2.2	1.3	2.1	0.81	0.44	100	0.072785	5
PC O-44:3	Phosphatidylcholine O-44:3	Phosphatidylcholines	0.13	0.12	0.066	0.16	0.075	0.16	0.085	0.045	80	0.07648	5
PC O-44:4	Phosphatidylcholine O-44:4	Phosphatidylcholines	0.24	0.26	0.21	0.35	0.22	0.31	0.089	0.056	100	0.02028	5
PC O-44:5	Phosphatidylcholine O-44:5	Phosphatidylcholines	1	1.1	0.71	1.6	0.85	1.3	0.48	0.33	100	0.004	5
PC O-44:6	Phosphatidylcholine O-44:6	Phosphatidylcholines	1.1	1.1	0.69	1.7	0.78	1.5	0.7	0.4	100	0.021	5
SM 33:1	Sphingomyelin 33:1	Sphingomyelins	5.9	5.5	4.7	6.1	4.8	6	1.2	0.64	100	0.009	5
SM 34:1	Sphingomyelin 34:1	Sphingomyelins	89	92	85	104	86	99	13	7.6	100	0.009	5
SM 34:2	Sphingomyelin 34:2	Sphingomyelins	12	12	9.6	13	11	13	2.3	1.4	100	0.005	5
SM 35:1	Sphingomyelin 35:1	Sphingomyelins	2.9	2.8	2.2	3.3	2.4	3.2	0.75	0.41	100	0.00719	5
SM 36:1	Sphingomyelin 36:1	Sphingomyelins	17	17	15	20	16	19	3.2	1.8	100	0.032	5
SM 36:2	Sphingomyelin 36:2	Sphingomyelins	8.1	7.8	5.2	9.6	6.6	8.9	2.3	1.6	100	0.031	5
SM 38:3	Sphingomyelin 38:3	Sphingomyelins	0.38	0.37	0.29	0.45	0.32	0.42	0.1	0.058	100	0.045	5
SM 40:4	Sphingomyelin 40:4	Sphingomyelins			0.12	0.12					33	0.0044	3
SM 41:1	Sphingomyelin 41:1	Sphingomyelins	11	9.7	6.5	12	7.5	12	4.1	2.3	100	0.08305	5
SM 41:2	Sphingomyelin 41:2	Sphingomyelins	6.9	7.1	5.5	8.8	5.7	8.6	2.9	1.5	100	0.032	5
SM 42:1	Sphingomyelin 42:1	Sphingomyelins	15	15	13	16	14	16	2.1	1.3	100	0.159	5
SM 42:2	Sphingomyelin 42:2	Sphingomyelins	29	29	25	36	26	32	6	4.2	100	0.325	5
SM 43:1	Sphingomyelin 43:1	Sphingomyelins	0.99	0.93	0.66	1.2	0.72	1.1	0.4	0.21	100	0.0216186	5
SM 44:1	Sphingomyelin 44:1	Sphingomyelins	0.12	0.12	0.073	0.14	0.096	0.14	0.045	0.028	100	0.629	5
SM 44:2	Sphingomyelin 44:2	Sphingomyelins	0.24	0.24	0.2	0.27	0.21	0.26	0.046	0.026	100	0.189	5
TG 14:0_32:2	Triacylglyceride 14:0_32:2	Triglycerides	0.87	0.97	0.22	1.9	0.32	1.7	1.4	0.73	80	0.216	5
TG 14:0_34:0	Triacylglyceride 14:0_34:0	Triglycerides	0.9	1.1	0.36	2.3	0.36	2.1	1.7	0.94	80	0.26075	5
TG 14:0_34:1	Triacylglyceride 14:0_34:1	Triglycerides	4.3	7.4	2.9	16	3.2	13	10	5.7	100	0.1175	5
TG 14:0_34:2	Triacylglyceride 14:0_34:2	Triglycerides	3.8	6.1	2.9	13	3.2	10	6.8	4.2	100	0.214	5
TG 14:0_34:3	Triacylglyceride 14:0_34:3	Triglycerides	1.2	1.7	0.81	3.4	0.91	2.7	1.8	1.1	100	1.075	5
TG 14:0_35:1	Triacylglyceride 14:0_35:1	Triglycerides	0.45	0.45	0.19	0.72				0.37	40	1.585	5
TG 14:0_35:2	Triacylglyceride 14:0_35:2	Triglycerides	0.33	0.35	0.14	0.62	0.16	0.58	0.41	0.22	80	0.108	5
TG 14:0_36:1	Triacylglyceride 14:0_36:1	Triglycerides	1.2	1.8	0.93	3.2	0.99	3	2	1.1	100	0.0715	5
TG 14:0_36:2	Triacylglyceride 14:0_36:2	Triglycerides	8	11	5.3	21	6.5	18	11	6.4	100	0.0981	5
TG 14:0_36:3	Triacylglyceride 14:0_36:3	Triglycerides	13	13	7.8	23	8	19	11	6.1	100	0.0470066	5
TG 14:0_36:4	Triacylglyceride 14:0_36:4	Triglycerides	6.6	5.9	2.9	8.4	3.3	8.1	4.8	2.5	100	0.16	5
TG 14:0_38:4	Triacylglyceride 14:0_38:4	Triglycerides	0.41	0.46	0.17	0.98	0.2	0.75	0.55	0.32	100	0.204	5
TG 14:0_38:5	Triacylglyceride 14:0_38:5	Triglycerides	0.36	0.5	0.24	1.2	0.25	0.81	0.56	0.38	100	0.33	5
TG 14:0_39:3	Triacylglyceride 14:0_39:3	Triglycerides									0	0.379	3
TG 14:0_40:5	Triacylglyceride 14:0_40:5	Triglycerides	0.36	0.36	0.21	0.5				0.21	100	0.216	2
TG 16:0_28:1	Triacylglyceride 16:0_28:1	Triglycerides	0.17	0.47	0.12	1.1	0.12			0.57	60	0.246	5
TG 16:0_28:2	Triacylglyceride 16:0_28:2	Triglycerides	0.42	0.43	0.37	0.48	0.39	0.47	0.084	0.044	80	0.08682	5
TG 16:0_30:2	Triacylglyceride 16:0_30:2	Triglycerides	0.8	1.1	0.46	2	0.47	1.8	1.3	0.68	100	0.441	5
TG 16:0_32:0	Triacylglyceride 16:0_32:0	Triglycerides	5.3	6.2	0.71	13	1.2	12	11	5.7	80	0.145	5
TG 16:0_32:1	Triacylglyceride 16:0_32:1	Triglycerides	7.7	12	4.4	30	4.5	23	18	11	100	0.701	5
TG 16:0_32:2	Triacylglyceride 16:0_32:2	Triglycerides	4.3	7.4	3.4	17	3.6	13	9.2	5.8	100	0.823	5
TG 16:0_32:3	Triacylglyceride 16:0_32:3	Triglycerides	0.85	1.4	0.6	3.3	0.6	2.5	1.9	1.1	100	0.491	5
TG 16:0_33:1	Triacylglyceride 16:0_33:1	Triglycerides	1.5	2.1	0.68	5.6	0.7	3.7	3	2	100	0.207	5
TG 16:0_33:2	Triacylglyceride 16:0_33:2	Triglycerides	0.69	1.2	0.59	2.8	0.62	1.9	1.3	0.93	100	0.332	5
TG 16:0_34:0	Triacylglyceride 16:0_34:0	Triglycerides	4.9	6.5	2.4	14	2.7	12	9.2	5.1	80	0.269	5
TG 16:0_34:1	Triacylglyceride 16:0_34:1	Triglycerides	39	47	19	99	22	75	52	32	100	0.166	5
TG 16:0_34:2	Triacylglyceride 16:0_34:2	Triglycerides	42	49	23	106	25	77	52	33	100	0.08668	5
TG 16:0_34:3	Triacylglyceride 16:0_34:3	Triglycerides	15	16	8.3	34	8.5	25	16	10	100	0.596	5
TG 16:0_34:4	Triacylglyceride 16:0_34:4	Triglycerides	1.3	1.8	0.8	4	1	2.8	1.8	1.3	100	0.508	5
TG 16:0_35:1	Triacylglyceride 16:0_35:1	Triglycerides	1	1.6	0.46	4.2	0.56	2.9	2.4	1.5	100	0.277	5
TG 16:0_35:2	Triacylglyceride 16:0_35:2	Triglycerides	2.1	2.7	1.2	6.5	1.2	4.6	3.4	2.2	100	0.088265	5
TG 16:0_35:3	Triacylglyceride 16:0_35:3	Triglycerides	0.98	1.5	0.73	3.4	0.79	2.4	1.6	1.1	100	0.185	5
TG 16:0_36:2	Triacylglyceride 16:0_36:2	Triglycerides	110	115	65	219	66	166	100	62	100	0.141	5
TG 16:0_36:3	Triacylglyceride 16:0_36:3	Triglycerides	129	149	98	258	111	197	86	63	100	0.186	5
TG 16:0_36:4	Triacylglyceride 16:0_36:4	Triglycerides	52	64	50	95	51	84	33	20	100	0.333	5
TG 16:0_36:5	Triacylglyceride 16:0_36:5	Triglycerides	7.2	8.7	5.6	13	5.7	13	6.8	3.6	100	0.655	5
TG 16:0_36:6	Triacylglyceride 16:0_36:6	Triglycerides	0.69	0.81	0.37	1.3	0.4	1.3	0.87	0.44	100	0.71	5
TG 16:0_37:3	Triacylglyceride 16:0_37:3	Triglycerides	0.53	0.57	0.47	0.71	0.47			0.13	60	0.072	5
TG 16:0_38:1	Triacylglyceride 16:0_38:1	Triglycerides	0.37	0.43	0.25	0.75	0.25	0.68	0.42	0.23	80	0.06085	5
TG 16:0_38:2	Triacylglyceride 16:0_38:2	Triglycerides	1.1	1.3	0.68	2.3	0.69	2	1.3	0.68	100	0.176	5
TG 16:0_38:3	Triacylglyceride 16:0_38:3	Triglycerides	2.2	2.8	1.4	4.8	1.8	4.2	2.4	1.4	100	0.07978	5
TG 16:0_38:4	Triacylglyceride 16:0_38:4	Triglycerides	3.6	4.3	2.1	8.3	2.4	6.4	4	2.4	100	0.14235	5
TG 16:0_38:5	Triacylglyceride 16:0_38:5	Triglycerides	4.2	4.8	2.8	8.8	3.2	6.7	3.5	2.3	100	0.0785	5
TG 16:0_38:6	Triacylglyceride 16:0_38:6	Triglycerides	2.7	3	1.8	4.9	1.9	4.2	2.4	1.3	100	0.1395	5
TG 16:0_38:7	Triacylglyceride 16:0_38:7	Triglycerides	0.79	0.8	0.5	1.1	0.57	1.1	0.48	0.26	80	0.219	5
TG 16:0_40:6	Triacylglyceride 16:0_40:6	Triglycerides	2.4	2.5	1.2	4.7	1.5	3.6	2.1	1.3	100	0.100895	5
TG 16:0_40:7	Triacylglyceride 16:0_40:7	Triglycerides	2.5	2.4	1.2	3.7	1.4	3.2	1.8	0.97	100	0.0718	5
TG 16:0_40:8	Triacylglyceride 16:0_40:8	Triglycerides	1.2	1.1	0.57	1.5	0.7	1.4	0.74	0.39	100	0.05202	5
TG 16:1_28:0	Triacylglyceride 16:1_28:0	Triglycerides	0.45	0.45	0.44	0.46				0.016	40	0.441	5
TG 16:1_30:1	Triacylglyceride 16:1_30:1	Triglycerides	0.91	0.81	0.098	1.4	0.098			0.66	60	0.183	5
TG 16:1_32:0	Triacylglyceride 16:1_32:0	Triglycerides	1.9	2.4	0.18	5.5	0.46	4.7	4.3	2.3	80	0.367	5
TG 16:1_32:1	Triacylglyceride 16:1_32:1	Triglycerides	3.5	4.3	0.78	9.5	1.3	8.2	6.9	3.7	80	0.233	5
TG 16:1_32:2	Triacylglyceride 16:1_32:2	Triglycerides	1.1	1.7	0.54	4.4	0.64	3.1	2.5	1.6	100	0.101	5
TG 16:1_33:1	Triacylglyceride 16:1_33:1	Triglycerides	0.47	0.72	0.1	1.8	0.14	1.5	1.4	0.77	80	0.165	5
TG 16:1_34:0	Triacylglyceride 16:1_34:0	Triglycerides	2.2	2.6	0.44	5.4	0.85	4.6	3.8	2.1	80	0.218	5
TG 16:1_34:1	Triacylglyceride 16:1_34:1	Triglycerides	17	19	6.2	46	6.6	33	26	16	100	0.1515	5
TG 16:1_34:2	Triacylglyceride 16:1_34:2	Triglycerides	13	15	6.3	33	6.5	24	18	11	100	0.087	5
TG 16:1_34:3	Triacylglyceride 16:1_34:3	Triglycerides	3.2	3.5	1.3	7.7	1.5	5.7	4.1	2.5	100	0.049255	5
TG 16:1_36:1	Triacylglyceride 16:1_36:1	Triglycerides	2.8	2.7	0.99	5.9	1	4.4	3.4	2	100	0.14	5
TG 16:1_36:2	Triacylglyceride 16:1_36:2	Triglycerides	16	16	6.9	32	7.5	25	18	10	100	0.147	5
TG 16:1_36:3	Triacylglyceride 16:1_36:3	Triglycerides	17	20	10	35	13	28	15	9.4	100	0.22	5
TG 16:1_36:4	Triacylglyceride 16:1_36:4	Triglycerides	7.9	8.6	5	14	6.2	11	5.2	3.5	100	0.225	5
TG 16:1_36:5	Triacylglyceride 16:1_36:5	Triglycerides	1.3	1.4	0.7	2.4	0.84	2.1	1.3	0.67	100	0.121	5
TG 16:1_38:3	Triacylglyceride 16:1_38:3	Triglycerides	0.42	0.47	0.27	0.87	0.3	0.66	0.36	0.24	100	0.177	5
TG 16:1_38:4	Triacylglyceride 16:1_38:4	Triglycerides	0.68	0.85	0.36	1.6	0.48	1.3	0.83	0.48	100	0.796	5
TG 16:1_38:5	Triacylglyceride 16:1_38:5	Triglycerides	0.74	1	0.46	2.2	0.57	1.6	1	0.71	100	0.473	5
TG 17:0_32:1	Triacylglyceride 17:0_32:1	Triglycerides	0.67	0.58	0.24	0.82	0.24			0.3	60	0.05679	5
TG 17:0_34:1	Triacylglyceride 17:0_34:1	Triglycerides	1.2	1.4	0.66	3.4	0.67	2.4	1.7	1.1	100	0.183	5
TG 17:0_34:2	Triacylglyceride 17:0_34:2	Triglycerides	1.2	1.4	0.63	3.3	0.73	2.2	1.5	1.1	100	0.2255	5
TG 17:0_34:3	Triacylglyceride 17:0_34:3	Triglycerides	0.24	0.42	0.21	1.1	0.22	0.71	0.49	0.38	100	0.601	5
TG 17:0_36:3	Triacylglyceride 17:0_36:3	Triglycerides	2.5	2.9	1.7	5.6	1.9	4.1	2.1	1.5	100	0.34	5
TG 17:0_36:4	Triacylglyceride 17:0_36:4	Triglycerides	0.99	1.2	0.77	2.1	0.83	1.8	0.94	0.56	100	0.226	5
TG 17:1_32:1	Triacylglyceride 17:1_32:1	Triglycerides	0.43	0.64	0.26	1.4	0.27	1.2	0.95	0.55	80	0.050025	5
TG 17:1_34:1	Triacylglyceride 17:1_34:1	Triglycerides	1.4	1.9	0.54	5	0.67	3.4	2.7	1.8	100	0.0569	5
TG 17:1_34:2	Triacylglyceride 17:1_34:2	Triglycerides	1.1	1.4	0.55	3.5	0.55	2.4	1.9	1.2	100	0.014	5
TG 17:1_34:3	Triacylglyceride 17:1_34:3	Triglycerides	0.38	0.53	0.21	1.2	0.25	0.96	0.72	0.42	80	0.019675	5
TG 17:1_36:3	Triacylglyceride 17:1_36:3	Triglycerides	1.1	1.4	0.7	2.7	0.87	2	1.2	0.77	100	0.02356	5
TG 17:1_36:4	Triacylglyceride 17:1_36:4	Triglycerides	0.48	0.64	0.44	1.2	0.45	0.89	0.44	0.3	100	0.093	5
TG 17:1_36:5	Triacylglyceride 17:1_36:5	Triglycerides	0.21	0.26	0.14	0.47	0.15	0.41	0.26	0.15	80	0.05748	5
TG 17:1_38:5	Triacylglyceride 17:1_38:5	Triglycerides	0.0074	0.059	0.0055	0.16	0.0055			0.091	60	0.097	5
TG 17:1_38:6	Triacylglyceride 17:1_38:6	Triglycerides	0.014	0.047	0.013	0.11	0.013			0.057	60	0.1019	5
TG 17:1_38:7	Triacylglyceride 17:1_38:7	Triglycerides	0.04	0.04	0.033	0.046				0.0097	40	0.1239	5
TG 17:2_34:2	Triacylglyceride 17:2_34:2	Triglycerides	0.23	0.29	0.15	0.55	0.17	0.47	0.3	0.18	80	0.0401	5
TG 17:2_34:3	Triacylglyceride 17:2_34:3	Triglycerides	0.13	0.21	0.13	0.36	0.13			0.13	60	0.0539	5
TG 17:2_36:2	Triacylglyceride 17:2_36:2	Triglycerides	0.21	0.25	0.17	0.39	0.17	0.35	0.18	0.1	80	0.031795	5
TG 17:2_36:3	Triacylglyceride 17:2_36:3	Triglycerides	0.24	0.29	0.19	0.51	0.2	0.39	0.19	0.13	100	0.1675	5
TG 17:2_36:4	Triacylglyceride 17:2_36:4	Triglycerides	0.26	0.35	0.23	0.56	0.24	0.5	0.27	0.15	100	0.307	5
TG 17:2_38:5	Triacylglyceride 17:2_38:5	Triglycerides	0.17	0.14	0.081	0.18	0.081			0.053	60	0.132	5
TG 17:2_38:6	Triacylglyceride 17:2_38:6	Triglycerides	0.22	0.24	0.18	0.33	0.19	0.3	0.11	0.064	80	0.0759	5
TG 17:2_38:7	Triacylglyceride 17:2_38:7	Triglycerides	0.072	0.07	0.049	0.088	0.049			0.02	60	0.07783	5
TG 18:0_30:0	Triacylglyceride 18:0_30:0	Triglycerides	0.73	0.57	0.098	0.89	0.098			0.42	60	0.218	5
TG 18:0_30:1	Triacylglyceride 18:0_30:1	Triglycerides	0.51	0.47	0.02	0.85	0.073	0.84	0.77	0.41	80	0.072495	5
TG 18:0_32:0	Triacylglyceride 18:0_32:0	Triglycerides	1.7	1.7	0.093	3.4	0.093			1.7	60	0.5	5
TG 18:0_32:1	Triacylglyceride 18:0_32:1	Triglycerides	1.2	1.6	0.35	3.9	0.5	2.9	2.4	1.4	100	2.56	5
TG 18:0_32:2	Triacylglyceride 18:0_32:2	Triglycerides	0.45	0.79	0.35	1.8	0.36	1.4	1	0.62	100	0.271	5
TG 18:0_34:2	Triacylglyceride 18:0_34:2	Triglycerides	4.5	6.2	2.7	13	3.1	10	6.9	4.3	100	0.135	5
TG 18:0_34:3	Triacylglyceride 18:0_34:3	Triglycerides	1.1	1.3	0.56	2.7	0.61	2.1	1.5	0.85	100	0.037365	5
TG 18:0_36:1	Triacylglyceride 18:0_36:1	Triglycerides	0.2	0.61	0.13	1.5	0.13			0.79	60	0.07297	5
TG 18:0_36:2	Triacylglyceride 18:0_36:2	Triglycerides	6.5	8.1	3.4	17	4.3	13	8.4	5.4	100	0.095	5
TG 18:0_36:3	Triacylglyceride 18:0_36:3	Triglycerides	8.6	11	7.7	20	8.1	16	7.9	4.9	100	1.5755	5
TG 18:0_36:4	Triacylglyceride 18:0_36:4	Triglycerides	5.5	5.8	4	8.7	4.3	7.5	3.1	1.8	100	0.248	5
TG 18:0_36:5	Triacylglyceride 18:0_36:5	Triglycerides	0.81	0.91	0.54	1.4	0.62	1.2	0.63	0.35	100	0.09108	5
TG 18:0_38:6	Triacylglyceride 18:0_38:6	Triglycerides	1.1	1.2	0.66	1.7	0.86	1.5	0.63	0.39	100	0.047	5
TG 18:0_38:7	Triacylglyceride 18:0_38:7	Triglycerides	0.31	0.28	0.14	0.41	0.16	0.39	0.22	0.11	100	0.0905	5
TG 18:1_26:0	Triacylglyceride 18:1_26:0	Triglycerides	0.48	0.55	0.22	1	0.22	0.95	0.73	0.4	80	0.663	5
TG 18:1_28:1	Triacylglyceride 18:1_28:1	Triglycerides	0.91	0.92	0.31	1.6	0.33	1.5	1.2	0.66	80	0.592	5
TG 18:1_30:0	Triacylglyceride 18:1_30:0	Triglycerides	5.1	9.5	3.8	21	4.1	17	13	7.5	100	0.402	5
TG 18:1_30:1	Triacylglyceride 18:1_30:1	Triglycerides	3.2	6.5	2.6	14	2.7	12	9.2	5.1	100	0.2255	5
TG 18:1_30:2	Triacylglyceride 18:1_30:2	Triglycerides	1.5	2.1	0.81	3.4	1.1	3.3	2.2	1.1	100	0.06903	5
TG 18:1_31:0	Triacylglyceride 18:1_31:0	Triglycerides	1.5	1.9	0.68	4	0.79	3.5	2.7	1.5	80	0.181	5
TG 18:1_32:0	Triacylglyceride 18:1_32:0	Triglycerides	23	29	12	63	13	47	34	21	100	0.2	5
TG 18:1_32:1	Triacylglyceride 18:1_32:1	Triglycerides	37	41	16	89	18	67	49	29	100	0.126	5
TG 18:1_32:2	Triacylglyceride 18:1_32:2	Triglycerides	13	16	8	31	9.7	25	15	8.9	100	0.195	5
TG 18:1_32:3	Triacylglyceride 18:1_32:3	Triglycerides	2	2.1	1.1	4.1	1.1	3.1	1.9	1.2	100	0.907	5
TG 18:1_33:0	Triacylglyceride 18:1_33:0	Triglycerides	1.2	1.7	0.61	4.1	0.69	2.9	2.2	1.4	100	0.561	5
TG 18:1_33:1	Triacylglyceride 18:1_33:1	Triglycerides	4.4	5.2	2.1	12	2.5	8.4	5.9	4.1	100	0.1655	5
TG 18:1_33:2	Triacylglyceride 18:1_33:2	Triglycerides	2.3	2.7	1.4	5	1.8	3.8	2	1.4	100	0.062285	5
TG 18:1_33:3	Triacylglyceride 18:1_33:3	Triglycerides	0.61	0.59	0.4	0.83	0.43	0.74	0.3	0.17	100	0.1195	5
TG 18:1_34:1	Triacylglyceride 18:1_34:1	Triglycerides	176	189	104	358	107	277	170	103	100	0.05142	5
TG 18:1_34:2	Triacylglyceride 18:1_34:2	Triglycerides	138	158	100	280	111	214	103	71	100	0.849	5
TG 18:1_34:3	Triacylglyceride 18:1_34:3	Triglycerides	25	27	15	49	19	37	19	13	100	0.69	5
TG 18:1_34:4	Triacylglyceride 18:1_34:4	Triglycerides	2.6	2.9	1.7	5	2.1	3.9	1.8	1.2	100	0.783	5
TG 18:1_35:2	Triacylglyceride 18:1_35:2	Triglycerides	3.5	4.1	2	7.7	2.4	6.1	3.6	2.2	100	15.8	5
TG 18:1_35:3	Triacylglyceride 18:1_35:3	Triglycerides	1.3	1.4	0.72	2.5	0.96	1.9	0.98	0.65	100	0.25	5
TG 18:1_36:0	Triacylglyceride 18:1_36:0	Triglycerides	1.9	1.9	0.68	3.4	0.86	3.1	2.3	1.2	80	0.07562	5
TG 18:1_36:1	Triacylglyceride 18:1_36:1	Triglycerides	17	19	8.4	39	9.9	29	19	12	100	0.216	5
TG 18:1_36:2	Triacylglyceride 18:1_36:2	Triglycerides	68	66	38	111	40	90	51	29	100	0.06176	5
TG 18:1_36:3	Triacylglyceride 18:1_36:3	Triglycerides	70	75	49	118	58	95	37	26	100	0.05392	5
TG 18:1_36:4	Triacylglyceride 18:1_36:4	Triglycerides	28	32	22	46	24	43	19	10	100	0.298	5
TG 18:1_36:5	Triacylglyceride 18:1_36:5	Triglycerides	5.9	7	4.5	11	4.9	9.7	4.8	2.6	100	0.125	5
TG 18:1_36:6	Triacylglyceride 18:1_36:6	Triglycerides	0.66	0.81	0.48	1.4	0.56	1.1	0.59	0.35	100	0.1525	5
TG 18:1_38:5	Triacylglyceride 18:1_38:5	Triglycerides	4.8	5.3	3	9.5	3.5	7.3	3.7	2.5	100	0.129	5
TG 18:1_38:6	Triacylglyceride 18:1_38:6	Triglycerides	3.2	3.2	1.9	4.7	2.2	4.2	1.9	1.1	100	0.411	5
TG 18:1_38:7	Triacylglyceride 18:1_38:7	Triglycerides	1	0.85	0.49	1.1	0.5	1.1	0.6	0.32	100	0.333	5
TG 18:2_28:0	Triacylglyceride 18:2_28:0	Triglycerides	0.96	1.2	0.42	2.2	0.61	2	1.4	0.73	100	0.229	5
TG 18:2_30:0	Triacylglyceride 18:2_30:0	Triglycerides	4.4	6.1	2.9	12	3.1	9.9	6.9	3.9	100	0.128	5
TG 18:2_30:1	Triacylglyceride 18:2_30:1	Triglycerides	2.6	4	1.8	8	2.1	6.5	4.5	2.6	100	0.208	5
TG 18:2_31:0	Triacylglyceride 18:2_31:0	Triglycerides	0.87	1.1	0.79	1.6	0.79			0.47	60	0.127	5
TG 18:2_32:0	Triacylglyceride 18:2_32:0	Triglycerides	15	21	12	41	13	31	18	12	100	0.078005	5
TG 18:2_32:1	Triacylglyceride 18:2_32:1	Triglycerides	21	26	14	50	16	38	22	14	100	0.2315	5
TG 18:2_32:2	Triacylglyceride 18:2_32:2	Triglycerides	11	10	6.3	16	6.4	14	7.9	4.3	100	0.495	5
TG 18:2_33:0	Triacylglyceride 18:2_33:0	Triglycerides	0.79	1.2	0.7	2.6	0.7	1.9	1.2	0.83	100	0.378	5
TG 18:2_33:1	Triacylglyceride 18:2_33:1	Triglycerides	2.9	3.6	1.9	7.2	2.2	5.3	3	2.1	100	0.1215	5
TG 18:2_33:2	Triacylglyceride 18:2_33:2	Triglycerides	1.5	1.8	1.2	2.9	1.3	2.6	1.3	0.71	100	0.057	5
TG 18:2_34:0	Triacylglyceride 18:2_34:0	Triglycerides	13	16	11	30	11	23	11	7.8	100	0.114	5
TG 18:2_34:1	Triacylglyceride 18:2_34:1	Triglycerides	120	141	95	243	107	185	78	59	100	0.06609	5
TG 18:2_34:2	Triacylglyceride 18:2_34:2	Triglycerides	90	105	78	160	82	136	54	33	100	0.047425	5
TG 18:2_34:3	Triacylglyceride 18:2_34:3	Triglycerides	14	17	11	28	12	23	11	6.6	100	0.566	5
TG 18:2_34:4	Triacylglyceride 18:2_34:4	Triglycerides	1.6	2	1.2	3.2	1.3	2.9	1.6	0.86	100	3.72	5
TG 18:2_35:1	Triacylglyceride 18:2_35:1	Triglycerides	2.5	2.9	1.7	5.4	2	4	2.1	1.4	100	8.23	5
TG 18:2_35:2	Triacylglyceride 18:2_35:2	Triglycerides	2.5	2.9	1.6	4.8	1.9	4	2.1	1.2	100	6.29	5
TG 18:2_35:3	Triacylglyceride 18:2_35:3	Triglycerides	1	1	0.56	1.5	0.64	1.4	0.75	0.39	100	0.2455	5
TG 18:2_36:0	Triacylglyceride 18:2_36:0	Triglycerides	1.2	1.5	0.89	3	0.91	2.3	1.4	0.89	100	0.052265	5
TG 18:2_36:1	Triacylglyceride 18:2_36:1	Triglycerides	10	14	10	24	10	19	9.2	6	100	0.039855	5
TG 18:2_36:2	Triacylglyceride 18:2_36:2	Triglycerides	42	45	31	67	35	55	20	14	100	0.03866	5
TG 18:2_36:3	Triacylglyceride 18:2_36:3	Triglycerides	33	41	31	59	31	55	24	13	100	0.04415	5
TG 18:2_36:4	Triacylglyceride 18:2_36:4	Triglycerides	15	19	13	30	14	27	13	7.6	100	0.066435	5
TG 18:2_36:5	Triacylglyceride 18:2_36:5	Triglycerides	3.3	4.5	2.7	8.5	2.9	6.7	3.8	2.4	100	0.1495	5
TG 18:2_38:4	Triacylglyceride 18:2_38:4	Triglycerides	2.2	2.7	1.8	4.5	1.9	3.7	1.8	1.1	100	0.418	5
TG 18:2_38:5	Triacylglyceride 18:2_38:5	Triglycerides	3.1	3.7	2.3	5.8	2.4	5.2	2.8	1.5	100	0.04214	5
TG 18:2_38:6	Triacylglyceride 18:2_38:6	Triglycerides	2	2.1	1.4	2.8	1.4	2.8	1.4	0.68	100	0.1155	5
TG 18:3_30:0	Triacylglyceride 18:3_30:0	Triglycerides	0.7	0.77	0.28	1.8	0.33	1.3	0.93	0.59	100	0.158	5
TG 18:3_32:0	Triacylglyceride 18:3_32:0	Triglycerides	2.2	2.5	1.4	4.9	1.4	3.6	2.2	1.4	100	0.1065	5
TG 18:3_32:1	Triacylglyceride 18:3_32:1	Triglycerides	3.1	3.3	1.4	6.5	1.8	4.9	3.1	2	100	0.070245	5
TG 18:3_33:2	Triacylglyceride 18:3_33:2	Triglycerides	0.14	0.13	0.041	0.21	0.064	0.19	0.13	0.069	80	0.123	5
TG 18:3_34:0	Triacylglyceride 18:3_34:0	Triglycerides	1.7	2	1.1	3.9	1.2	2.9	1.7	1.1	100	0.06133	5
TG 18:3_34:1	Triacylglyceride 18:3_34:1	Triglycerides	14	16	9.6	29	11	23	12	7.7	100	0.0804964	5
TG 18:3_34:2	Triacylglyceride 18:3_34:2	Triglycerides	9.5	12	7.7	21	7.9	18	10	5.7	100	0.07724	5
TG 18:3_34:3	Triacylglyceride 18:3_34:3	Triglycerides	1.8	2.2	1.3	3.7	1.4	3.3	1.9	1	100	0.068	5
TG 18:3_35:2	Triacylglyceride 18:3_35:2	Triglycerides	0.3	0.54	0.26	1.1	0.27	0.93	0.65	0.36	100	0.152	5
TG 18:3_36:1	Triacylglyceride 18:3_36:1	Triglycerides	1.6	1.7	1	3	1.2	2.3	1.2	0.74	100	0.113	5
TG 18:3_36:2	Triacylglyceride 18:3_36:2	Triglycerides	7.3	7.2	4.2	11	4.7	9.6	4.9	2.6	100	0.245	5
TG 18:3_36:3	Triacylglyceride 18:3_36:3	Triglycerides	6.2	7.9	5.1	13	5.2	11	6.1	3.3	100	0.1235	5
TG 18:3_36:4	Triacylglyceride 18:3_36:4	Triglycerides	2.5	3.5	2	6.8	2.2	5.3	3.1	2	100	0.428	5
TG 18:3_38:5	Triacylglyceride 18:3_38:5	Triglycerides	0.66	0.81	0.43	1.5	0.44	1.3	0.89	0.49	80	0.18	5
TG 18:3_38:6	Triacylglyceride 18:3_38:6	Triglycerides	0.44	0.48	0.32	0.72	0.33	0.67	0.34	0.19	80	0.1135	5
TG 20:0_32:3	Triacylglyceride 20:0_32:3	Triglycerides	0.38	0.43	0.3	0.71	0.31	0.57	0.26	0.17	100	0.039	5
TG 20:0_32:4	Triacylglyceride 20:0_32:4	Triglycerides	0.54	0.51	0.31	0.73	0.36	0.64	0.28	0.16	100	0.04003	5
TG 20:0_34:1	Triacylglyceride 20:0_34:1	Triglycerides	0.6	0.54	0.33	0.71	0.38	0.68	0.29	0.16	100	0.07104	5
TG 20:1_24:3	Triacylglyceride 20:1_24:3	Triglycerides									0	0.102	5
TG 20:1_26:1	Triacylglyceride 20:1_26:1	Triglycerides									0	0.099	5
TG 20:1_30:1	Triacylglyceride 20:1_30:1	Triglycerides	0.25	0.25	0.23	0.26				0.021	40	0.1145	5
TG 20:1_31:0	Triacylglyceride 20:1_31:0	Triglycerides									0	0.099165	3
TG 20:1_32:0	Triacylglyceride 20:1_32:0	Triglycerides									0	0.33	2
TG 20:1_32:1	Triacylglyceride 20:1_32:1	Triglycerides	0.44	0.45	0.18	0.75	0.2	0.72	0.52	0.27	80	0.116	5
TG 20:1_32:2	Triacylglyceride 20:1_32:2	Triglycerides	0.23	0.37	0.2	0.64	0.2	0.6	0.4	0.22	100	0.145	5
TG 20:1_32:3	Triacylglyceride 20:1_32:3	Triglycerides	0.23	0.25	0.12	0.41	0.14	0.38	0.23	0.12	80	0.0827	5
TG 20:1_34:0	Triacylglyceride 20:1_34:0	Triglycerides	0.24	0.24	0.14	0.33	0.15	0.32	0.17	0.093	80	0.05495	5
TG 20:1_34:1	Triacylglyceride 20:1_34:1	Triglycerides	1.3	1.3	0.75	2.2	0.76	1.9	1.2	0.62	100	0.041	5
TG 20:1_34:2	Triacylglyceride 20:1_34:2	Triglycerides	1	1.1	0.75	1.7	0.79	1.5	0.73	0.4	100	0.106	5
TG 20:1_34:3	Triacylglyceride 20:1_34:3	Triglycerides	0.29	0.29	0.2	0.38	0.2			0.091	60	0.01616	5
TG 20:2_32:0	Triacylglyceride 20:2_32:0	Triglycerides	0.77	0.77	0.73	0.8				0.049	40	0.0419	5
TG 20:2_32:1	Triacylglyceride 20:2_32:1	Triglycerides	0.46	0.61	0.22	1.2	0.27	1	0.74	0.41	100	0.0726	5
TG 20:2_34:1	Triacylglyceride 20:2_34:1	Triglycerides	1.5	2	0.87	3.6	1.1	3	1.8	1.1	100	0.097	5
TG 20:2_34:2	Triacylglyceride 20:2_34:2	Triglycerides	1.5	1.6	0.89	3	0.98	2.3	1.4	0.85	100	0.0646	5
TG 20:2_34:3	Triacylglyceride 20:2_34:3	Triglycerides	0.38	0.43	0.18	0.75	0.25	0.63	0.38	0.21	100	0.0597	5
TG 20:2_34:4	Triacylglyceride 20:2_34:4	Triglycerides	0.065	0.076	0.037	0.14	0.044	0.12	0.074	0.042	80	0.069705	5
TG 20:2_36:5	Triacylglyceride 20:2_36:5	Triglycerides	0.1	0.098	0.046	0.14	0.054	0.14	0.082	0.043	80	0.045	5
TG 20:3_32:0	Triacylglyceride 20:3_32:0	Triglycerides	0.51	0.74	0.33	1.8	0.38	1.2	0.84	0.62	100	0.109	5
TG 20:3_32:1	Triacylglyceride 20:3_32:1	Triglycerides	0.73	1	0.31	2.4	0.46	1.7	1.2	0.83	100	0.032735	5
TG 20:3_32:2	Triacylglyceride 20:3_32:2	Triglycerides	0.47	0.52	0.3	0.96	0.34	0.72	0.38	0.26	100	0.207	5
TG 20:3_34:0	Triacylglyceride 20:3_34:0	Triglycerides	0.46	0.58	0.27	1.2	0.32	0.9	0.58	0.38	100	0.0939	5
TG 20:3_34:1	Triacylglyceride 20:3_34:1	Triglycerides	3	4.1	1.8	9.4	2.3	6.4	4.1	3	100	0.053755	5
TG 20:3_34:2	Triacylglyceride 20:3_34:2	Triglycerides	2.6	3.3	1.6	6.9	2.1	5	2.9	2.1	100	0.116	5
TG 20:3_34:3	Triacylglyceride 20:3_34:3	Triglycerides	0.73	0.82	0.33	1.7	0.45	1.2	0.78	0.51	100	0.062815	5
TG 20:3_36:3	Triacylglyceride 20:3_36:3	Triglycerides	1.8	1.9	1	3.5	1.2	2.7	1.5	0.94	100	0.0976	5
TG 20:3_36:4	Triacylglyceride 20:3_36:4	Triglycerides	0.79	0.97	0.75	1.5	0.75	1.3	0.51	0.3	100	0.0292	5
TG 20:3_36:5	Triacylglyceride 20:3_36:5	Triglycerides	0.32	0.36	0.26	0.54	0.27	0.49	0.23	0.13	80	0.209	5
TG 20:4_30:0	Triacylglyceride 20:4_30:0	Triglycerides	0.53	0.61	0.28	1.3	0.29	0.97	0.67	0.4	100	0.0695	5
TG 20:4_32:0	Triacylglyceride 20:4_32:0	Triglycerides	1.2	1.8	0.87	4.1	1	2.8	1.8	1.3	100	0.052835	5
TG 20:4_32:1	Triacylglyceride 20:4_32:1	Triglycerides	1.6	2.2	0.97	4.7	1.3	3.3	2	1.5	100	0.317	5
TG 20:4_32:2	Triacylglyceride 20:4_32:2	Triglycerides	0.7	0.98	0.55	2	0.56	1.5	0.98	0.61	100	0.02652	5
TG 20:4_33:2	Triacylglyceride 20:4_33:2	Triglycerides	0.2	0.29	0.18	0.54	0.18	0.43	0.25	0.15	100	2.4	5
TG 20:4_34:0	Triacylglyceride 20:4_34:0	Triglycerides	1.2	1.5	0.8	3.1	0.97	2.2	1.2	0.93	100	1.829	5
TG 20:4_34:1	Triacylglyceride 20:4_34:1	Triglycerides	9.7	11	6.2	20	7	15	8.1	5.6	100	0.638	5
TG 20:4_34:2	Triacylglyceride 20:4_34:2	Triglycerides	7.3	9.3	6.1	16	6.4	13	6.8	4.2	100	0.1358	5
TG 20:4_34:3	Triacylglyceride 20:4_34:3	Triglycerides	1.6	1.8	1.2	2.9	1.3	2.4	1	0.66	100	0.0528	5
TG 20:4_35:3	Triacylglyceride 20:4_35:3	Triglycerides	0.086	0.098	0.043	0.17	0.048	0.16	0.11	0.059	80	0.064385	5
TG 20:4_36:2	Triacylglyceride 20:4_36:2	Triglycerides	7.3	7.7	5.3	12	5.8	9.8	4.1	2.6	100	0.08757	5
TG 20:4_36:3	Triacylglyceride 20:4_36:3	Triglycerides	5.9	6.9	5.1	9.5	5.4	8.8	3.4	1.9	100	0.151	5
TG 20:4_36:4	Triacylglyceride 20:4_36:4	Triglycerides	3	3.5	2.1	4.8	2.3	4.8	2.5	1.3	100	0.179	5
TG 20:4_36:5	Triacylglyceride 20:4_36:5	Triglycerides	0.81	0.94	0.48	1.6	0.61	1.3	0.73	0.43	100	0.124	5
TG 20:5_34:0	Triacylglyceride 20:5_34:0	Triglycerides	0.22	0.32	0.13	0.69	0.14	0.55	0.4	0.23	100	0.117	5
TG 20:5_34:1	Triacylglyceride 20:5_34:1	Triglycerides	1.9	2	0.8	3.3	0.98	3.1	2.1	1.1	100	0.167	5
TG 20:5_34:2	Triacylglyceride 20:5_34:2	Triglycerides	1.9	1.7	0.82	2.7	0.83	2.5	1.6	0.83	100	0.02262	5
TG 20:5_36:2	Triacylglyceride 20:5_36:2	Triglycerides	1	1.3	0.55	2.2	0.67	1.9	1.3	0.68	100	0.018395	5
TG 20:5_36:3	Triacylglyceride 20:5_36:3	Triglycerides	1.6	1.4	0.64	2.1	0.79	1.9	1.1	0.6	100	0.0503929	5
TG 22:0_32:4	Triacylglyceride 22:0_32:4	Triglycerides	0.058	0.058	0.051	0.066				0.01	40	0.01739	5
TG 22:1_32:5	Triacylglyceride 22:1_32:5	Triglycerides	0.068	0.068	0.068	0.069				0.0004	40	0.1105	5
TG 22:2_32:4	Triacylglyceride 22:2_32:4	Triglycerides	0.061	0.061	0.052	0.07				0.012	40	0.0876	5
TG 22:3_30:2	Triacylglyceride 22:3_30:2	Triglycerides									0	0.791	5
TG 22:4_32:0	Triacylglyceride 22:4_32:0	Triglycerides	0.19	0.33	0.13	0.66	0.13			0.29	60	0.775	5
TG 22:4_32:2	Triacylglyceride 22:4_32:2	Triglycerides	0.17	0.22	0.081	0.44	0.087	0.39	0.3	0.16	80	0.168	5
TG 22:4_34:2	Triacylglyceride 22:4_34:2	Triglycerides	0.85	1.1	0.65	2.1	0.69	1.8	1.1	0.62	100	0.071	5
TG 22:5_32:0	Triacylglyceride 22:5_32:0	Triglycerides	0.42	0.57	0.28	1.2	0.34	0.87	0.54	0.39	100	0.099	5
TG 22:5_32:1	Triacylglyceride 22:5_32:1	Triglycerides	0.54	0.72	0.37	1.6	0.43	1.1	0.67	0.49	100	0.08105	5
TG 22:5_34:1	Triacylglyceride 22:5_34:1	Triglycerides	3	3.7	1.7	7.5	2.2	5.6	3.4	2.2	100	0.072975	5
TG 22:5_34:2	Triacylglyceride 22:5_34:2	Triglycerides	2.9	3.4	1.5	6.5	1.9	5.1	3.2	1.9	100	0.126	5
TG 22:5_34:3	Triacylglyceride 22:5_34:3	Triglycerides	0.59	0.61	0.33	0.99	0.36	0.86	0.51	0.27	100	0.03057	5
TG 22:6_32:0	Triacylglyceride 22:6_32:0	Triglycerides	0.66	0.73	0.36	1.1	0.45	1	0.59	0.3	100	0.025	5
TG 22:6_32:1	Triacylglyceride 22:6_32:1	Triglycerides	1.1	1	0.42	1.5	0.57	1.4	0.83	0.44	100	0.0639	5
TG 22:6_34:1	Triacylglyceride 22:6_34:1	Triglycerides	4.1	4.4	2.3	6	3	5.9	2.9	1.6	100	0.023	5
TG 22:6_34:2	Triacylglyceride 22:6_34:2	Triglycerides	4.5	4.1	2.4	5.5	2.8	5.2	2.4	1.3	100	0.061	5
TG 22:6_34:3	Triacylglyceride 22:6_34:3	Triglycerides	0.98	0.93	0.52	1.4	0.61	1.2	0.61	0.33	100	0.158	5
Hex3Cer d18:1/16:0	Trihexosylceramide d18:1/16:0	Trihexosylceramides	1.4	1.4	1.2	1.8	1.2	1.6	0.45	0.25	100	0.26	5
Hex3Cer d18:1/18:0	Trihexosylceramide d18:1/18:0	Trihexosylceramides	0.17	0.17	0.12	0.2	0.13	0.2	0.069	0.036	80	0.022	5
Hex3Cer d18:1/20:0	Trihexosylceramide d18:1/20:0	Trihexosylceramides	0.089	0.12	0.051	0.23	0.051			0.094	60	0.023	5
Hex3Cer d18:1/22:0	Trihexosylceramide d18:1/22:0	Trihexosylceramides	0.2	0.22	0.12	0.35	0.15	0.28	0.13	0.086	100	0.022	5
Hex3Cer d18:1/24:1	Trihexosylceramide d18:1/24:1	Trihexosylceramides	0.55	0.53	0.32	0.78	0.34	0.7	0.35	0.19	100	0.022	5
Hex3Cer d18:1/26:1	Trihexosylceramide d18:1/26:1	Trihexosylceramides	0.053	0.051	0.023	0.074	0.028	0.071	0.043	0.022	80	0.017	5
Choline	Choline	Vitamins and Cofactors	12	12	9.5	15	9.8	14	4.1	2.2	100	0.26	5
Disclaimer:
The reference ranges do not represent a diagnosis but serve as a means of comparison only. A reference range provides no statement about whether a person is sick or healthy.
Individuals with metabolite concentrations outside the range can therefore be healthy and individuals with metabolite concentrations in the reference range can be ill.

## Sheet: Black-female-40s
Quantitative metabolomics database (QMDB)
Selected matrix:	human plasma
Assay:	MxP® Quant 500
Age:	40 to 49
Gender:	f
Ethnicity:	Black or African American
Samples found matching the preferences	21
Short Name	Metabolite	Class	Median [µM]	Mean [µM]	Min [µM]	Max [µM]	1st quartile [µM]	3rd quartile [µM]	Interquartal range [µM]	Standard deviation	% of samples > LOD	Typical LOD [µM]	No of samples
C0	Carnitine	Acylcarnitines	35	37	23	51	29	45	16	8.7	100	1.5065	21
C2	Acetylcarnitine	Acylcarnitines	4.4	4.8	2.4	7.6	3.6	6	2.4	1.5	100	0.060515	21
C3	Propionylcarnitine	Acylcarnitines	0.26	0.28	0.13	0.47	0.2	0.35	0.15	0.095	100	0.098	21
C3-DC (C4-OH)	Malonylcarnitine (Hydroxybutyrylcarnitine)	Acylcarnitines	0.075	0.13	0.036	0.28	0.041	0.25	0.21	0.1	38	0.057	21
C3-OH	Hydroxypropionylcarnitine	Acylcarnitines									0	0.363	21
C3:1	Propenoylcarnitine	Acylcarnitines									0	0.0362	21
C4	Butyrylcarnitine	Acylcarnitines	0.12	0.13	0.066	0.23	0.099	0.18	0.084	0.048	100	0.0604	21
C4:1	Butenylcarnitine	Acylcarnitines									0	0.054	21
C5	Valerylcarnitine	Acylcarnitines	0.11	0.1	0.051	0.17	0.087	0.13	0.041	0.03	90	0.0504	21
C5-DC (C6-OH)	Glutarylcarnitine (Hydroxyhexanoylcarnitine)	Acylcarnitines									0	0.09628	21
C5-M-DC	Methylglutarylcarnitine	Acylcarnitines			0.074	0.074					4.8	0.06872	21
C5-OH (C3-DC-M)	Hydroxyvalerylcarnitine (Methylmalonylcarnitine)	Acylcarnitines	0.059	0.059	0.028	0.094	0.041	0.076	0.035	0.023	24	0.1	21
C5:1	Tiglylcarnitine	Acylcarnitines									0	0.04377	21
C5:1-DC	Glutaconylcarnitine	Acylcarnitines									0	0.0423541	21
C6 (C4:1-DC)	Hexanoylcarnitine (Fumarylcarnitine)	Acylcarnitines	0.036	0.037	0.027	0.048	0.028	0.046	0.018	0.0092	19	0.153	21
C6:1	Hexenoylcarnitine	Acylcarnitines									0	0.09068	21
C7-DC	Pimelylcarnitine	Acylcarnitines	0.02	0.02	0.015	0.025				0.0068	9.5	0.060255	21
C8	Octanoylcarnitine	Acylcarnitines	0.065	0.12	0.022	0.38	0.029	0.19	0.17	0.13	29	0.223	21
C9	Nonanoylcarnitine	Acylcarnitines	0.047	0.047	0.044	0.049				0.0036	9.5	0.028	21
C10	Decanoylcarnitine	Acylcarnitines	0.22	0.24	0.082	0.48	0.21	0.31	0.1	0.11	90	0.1295	21
C10:1	Decenoylcarnitine	Acylcarnitines									0	0.4035	21
C10:2	Decadienoylcarnitine	Acylcarnitines	0.044	0.047	0.043	0.055	0.043			0.0066	14	0.1085	21
C12	Dodecanoylcarnitine	Acylcarnitines	0.061	0.061	0.06	0.063				0.0027	9.5	0.072	21
C12-DC	Dodecanedioylcarnitine	Acylcarnitines									0	1.019	21
C12:1	Dodecenoylcarnitine	Acylcarnitines									0	0.109	21
C14	Tetradecanoylcarnitine	Acylcarnitines			0.031	0.031					4.8	0.0599	21
C14:1	Tetradecenoylcarnitine	Acylcarnitines	0.058	0.059	0.039	0.098	0.046	0.065	0.02	0.016	67	0.0349	21
C14:1-OH	Hydroxytetradecenoylcarnitine	Acylcarnitines	0.021	0.021	0.021	0.021				1e-05	9.5	0.035385	21
C14:2	Tetradecadienoylcarnitine	Acylcarnitines	0.054	0.054	0.042	0.066				0.017	9.5	0.0322	21
C14:2-OH	Hydroxytetradecadienoylcarnitine	Acylcarnitines									0	0.031	21
C16	Hexadecanoylcarnitine	Acylcarnitines	0.079	0.077	0.039	0.1	0.057	0.095	0.039	0.023	24	0.088	21
C16-OH	Hydroxyhexadecanoylcarnitine	Acylcarnitines									0	0.077	21
C16:1	Hexadecenoylcarnitine	Acylcarnitines	0.036	0.045	0.03	0.083	0.032	0.063	0.032	0.022	24	0.05	21
C16:1-OH	Hydroxyhexadecenoylcarnitine	Acylcarnitines									0	0.039895	21
C16:2	Hexadecadienoylcarnitine	Acylcarnitines									0	0.02942	21
C16:2-OH	Hydroxyhexadecadienoylcarnitine	Acylcarnitines									0	0.041045	21
C18	Octadecanoylcarnitine	Acylcarnitines	0.032	0.033	0.022	0.046	0.025	0.042	0.016	0.009	24	0.02201	21
C18:1	Octadecenoylcarnitine	Acylcarnitines	0.16	0.15	0.089	0.21	0.12	0.18	0.063	0.04	43	0.082855	21
C18:1-OH	Hydroxyoctadecenoylcarnitine	Acylcarnitines									0	0.0687	21
C18:2	Octadecadienoylcarnitine	Acylcarnitines	0.061	0.076	0.046	0.17	0.055	0.094	0.04	0.03	90	0.0347	21
Trigonelline	Trigonelline	Alkaloids	0.35	0.39	0.042	0.85	0.081	0.69	0.61	0.3	95	0.042595	21
TMAO	Trimethylamine N-oxide	Amine Oxides	2.9	3.4	1.2	7.7	2.2	4.6	2.4	1.8	100	0.108	21
1-Met-His	1-Methylhistidine	Amino Acid Related	4.9	5	2.2	10	3.6	5.7	2.1	2	100	0.01	21
3-Met-His	3-Methylhistidine	Amino Acid Related	12	11	0.24	23	4.3	15	11	6.6	100	0.01	21
5-AVA	5-Aminovaleric acid	Amino Acid Related	0.027	0.035	0.023	0.059	0.023	0.053	0.03	0.016	29	0.04	21
AABA	alpha-Aminobutyric acid	Amino Acid Related	17	17	6.7	27	12	20	7.8	5.5	100	0.435	21
Ac-Orn	Acetylornithine	Amino Acid Related									0	0.065	21
ADMA	Asymmetric dimethylarginine	Amino Acid Related	0.48	0.49	0.3	0.7	0.44	0.54	0.1	0.085	100	0.08	21
alpha-AAA	alpha-Aminoadipic acid	Amino Acid Related	0.61	0.74	0.39	1.3	0.5	1	0.53	0.28	95	0.3	21
Anserine	L-Anserine	Amino Acid Related			0.017	0.017					4.8	0.01	21
BABA	beta-Aminobutyric acid	Amino Acid Related									0	0.03	21
Betaine	Betaine	Amino Acid Related	20	24	8	69	17	30	13	13	100	0.2	21
c4-OH-Pro	cis-4-Hydroxyproline	Amino Acid Related									0	0.3	21
Carnosine	Carnosine	Amino Acid Related									0	0.2	21
Cit	Citrulline	Amino Acid Related	30	33	20	56	24	39	16	11	100	1	21
Creatinine	Creatinine	Amino Acid Related	77	76	58	103	65	84	20	13	100	3.85	21
Cystine	Cystine	Amino Acid Related	36	35	4.9	63	24	43	19	15	100	0.07489	21
DOPA	Dihydroxyphenylalanine	Amino Acid Related	0.037	0.039	0.032	0.054	0.032	0.046	0.014	0.0089	24	0.148	21
HArg	Homoarginine	Amino Acid Related	3.7	4	1.9	10	2.6	4.7	2.1	1.9	100	0.01	21
HCys	Homocysteine	Amino Acid Related	5.3	5.7	3.1	12	4.5	6.5	2	1.9	100	0.266	21
Kynurenine	Kynurenine	Amino Acid Related	1.6	1.6	1	2.4	1.3	2.1	0.81	0.44	100	0.2265	21
Met-SO	Methionine-Sulfoxide	Amino Acid Related	0.52	0.62	0.28	1.2	0.47	0.75	0.28	0.25	100	0.1	21
Nitro-Tyr	Nitrotyrosine	Amino Acid Related									0	0.3	21
Orn	Ornithine	Amino Acid Related	83	88	54	136	65	115	50	27	100	1	21
PAG	Phenylacetylglycine	Amino Acid Related									0	0.01	21
PheAlaBetaine	Phenylalanine betaine	Amino Acid Related			0.012	0.012					4.8	0.01	21
ProBetaine	Proline betaine	Amino Acid Related	2.6	6.4	0.18	24	1.5	11	9.1	6.7	100	0.061	21
Sarcosine	Sarcosine	Amino Acid Related	4	4	1.9	7.4	3	4.3	1.3	1.5	100	0.1855	21
SDMA	Symmetric dimethylarginine	Amino Acid Related	0.5	0.52	0.36	0.73	0.43	0.61	0.18	0.12	100	0.02	21
t4-OH-Pro	trans-4-Hydroxyproline	Amino Acid Related	9.2	11	4.9	25	7.8	14	6.6	5.5	100	0.382	21
Taurine	Taurine	Amino Acid Related	61	71	31	184	51	82	31	36	100	0.363	21
TrpBetaine	Tryptophan betaine	Amino Acid Related	0.68	0.78	0.036	2.4	0.34	1.1	0.76	0.56	100	0.00811	21
Ala	Alanine	Amino Acids	364	392	198	695	322	434	112	119	100	2.4075	21
Arg	Arginine	Amino Acids	69	77	41	135	58	92	33	27	100	0.987	21
Asn	Asparagine	Amino Acids	52	57	43	96	48	64	16	13	100	0.5225	21
Asp	Aspartic Acid	Amino Acids	7.6	7.1	2.9	9.2	5.9	8.3	2.4	1.8	100	1.0305	21
Cys	Cysteine	Amino Acids	65	64	44	86	56	70	15	11	100	0.1	21
Gln	Glutamine	Amino Acids	599	656	534	883	562	763	201	113	100	3.45	21
Glu	Glutamic Acid	Amino Acids	54	58	30	111	43	65	21	22	100	2.662	21
Gly	Glycine	Amino Acids	312	311	157	527	216	371	155	106	100	4.7	21
His	Histidine	Amino Acids	92	96	74	139	81	109	28	17	100	1.1	21
Ile	Isoleucine	Amino Acids	75	73	52	98	59	84	25	14	100	0.759	21
Leu	Leucine	Amino Acids	121	127	85	180	105	142	37	27	100	1.095	21
Lys	Lysine	Amino Acids	183	183	122	297	144	196	53	46	100	1.4	21
Met	Methionine	Amino Acids	27	29	20	43	24	33	9	6.1	100	0.8055	21
Phe	Phenylalanine	Amino Acids	63	63	43	85	55	70	15	10	100	0.8685	21
Pro	Proline	Amino Acids	178	173	97	244	140	208	68	45	100	2.07	21
Ser	Serine	Amino Acids	115	115	36	170	99	143	44	31	100	1.55	21
Thr	Threonine	Amino Acids	140	155	88	247	121	188	67	43	100	0.9225	21
Trp	Tryptophan	Amino Acids	61	61	34	88	51	67	16	13	100	0.792	21
Tyr	Tyrosine	Amino Acids	76	72	35	100	57	84	27	18	100	0.4925	21
Val	Valine	Amino Acids	216	218	130	311	191	252	62	48	100	1.048	21
CA	Cholic Acid	Bile Acids	0.034	0.062	0.014	0.26	0.017	0.077	0.06	0.069	100	0.003	21
CDCA	Chenodeoxycholic acid	Bile Acids	0.085	0.11	0.039	0.25	0.065	0.17	0.1	0.063	67	0.02	21
DCA	Deoxycholic acid	Bile Acids	0.3	0.39	0.084	1.1	0.19	0.46	0.27	0.26	100	0.0081	21
GCA	Glycocholic acid	Bile Acids	0.12	0.21	0.042	0.77	0.089	0.24	0.15	0.2	100	0.00429	21
GCDCA	Glycochenodeoxycholic acid	Bile Acids	0.27	0.38	0.083	1	0.19	0.51	0.32	0.26	100	0.002	21
GDCA	Glycodeoxycholic acid	Bile Acids	0.28	0.34	0.055	1.3	0.15	0.43	0.28	0.28	100	0.0016736	21
GLCA	Glycolithocholic acid	Bile Acids	0.011	0.014	0.0034	0.045	0.0049	0.019	0.014	0.012	62	0.003565	21
GLCAS	Glycolithocholic acid sulfate	Bile Acids	0.22	0.31	0.029	0.94	0.14	0.51	0.36	0.23	100	0.0034	21
GUDCA	Glycoursodeoxycholic acid	Bile Acids	0.045	0.091	0.016	0.43	0.032	0.12	0.088	0.1	100	0.0019	21
TCA	Taurocholic acid	Bile Acids	0.022	0.043	0.006	0.17	0.012	0.065	0.053	0.046	76	0.005	21
TCDCA	Taurochenodeoxycholic acid	Bile Acids	0.052	0.076	0.021	0.26	0.028	0.12	0.095	0.064	100	0.004085	21
TDCA	Taurodeoxycholic acid	Bile Acids	0.039	0.07	0.0091	0.26	0.027	0.094	0.067	0.067	100	0.004	21
TLCA	Taurolithocholic acid	Bile Acids	0.0028	0.0032	0.001	0.0055	0.001	0.0054	0.0043	0.0022	33	0.002	21
TMCA	Tauro-muricholic acids	Bile Acids	0.014	0.018	0.0041	0.068	0.0096	0.023	0.013	0.014	95	0.002	21
beta-Ala	beta-Alanine	Biogenic Amines	2.2	2.7	1.1	7.2	1.9	3	1.1	1.4	100	0.11	21
Dopamine	Dopamine	Biogenic Amines									0	0.2315	21
GABA	gamma-Aminobutyric acid	Biogenic Amines	0.17	0.17	0.13	0.26	0.15	0.18	0.033	0.031	100	0.04652	21
Histamine	Histamine	Biogenic Amines									0	0.429	21
PEA	Phenylethylamine	Biogenic Amines									0	0.001	21
Putrescine	Putrescine	Biogenic Amines	0.1	0.13	0.023	0.29	0.088	0.16	0.072	0.063	86	0.0624	21
Serotonin	Serotonin	Biogenic Amines	0.12	0.39	0.032	3	0.064	0.33	0.27	0.75	76	0.04	21
Spermidine	Spermidine	Biogenic Amines	0.31	0.31	0.13	0.49				0.25	9.5	0.2	21
Spermine	Spermine	Biogenic Amines	0.19	0.21	0.17	0.28	0.17	0.25	0.08	0.048	24	0.2	21
Hexose	Hexose	Carbohydrates and Related	4900	4739	3428	5926	4174	5178	1004	660	100	88.1885	21
AconAcid	Aconitic acid	Carboxylic Acids	8.7	9.5	5.2	22	6.9	11	4.5	3.8	100	0.2667	21
DiCA(12:0)	Dodecanedioic acid	Carboxylic Acids									0	0.1595	21
DiCA(14:0)	Tetradecanedioic acid	Carboxylic Acids									0	0.09969	21
HipAcid	Hippuric acid	Carboxylic Acids	5.4	6	0.95	16	3.6	7.8	4.2	3.6	90	0.5	21
Lac	Lactic acid	Carboxylic Acids	3843	4101	2198	7125	3058	5082	2024	1365	100	143.401	21
OH-GlutAcid	Hydroxyglutaric acid	Carboxylic Acids			5.3	5.3					4.8	6.942	21
Suc	Succinic acid	Carboxylic Acids									0	20.851	21
Cer d16:1/18:0	Ceramide d16:1/18:0	Ceramides	0.082	0.096	0.036	0.2	0.068	0.12	0.051	0.043	67	0.025875	21
Cer d16:1/20:0	Ceramide d16:1/20:0	Ceramides	0.095	0.099	0.043	0.22	0.074	0.11	0.039	0.039	100	0.01891	21
Cer d16:1/22:0	Ceramide d16:1/22:0	Ceramides	0.34	0.37	0.21	0.65	0.28	0.44	0.16	0.14	100	0.0694	21
Cer d16:1/23:0	Ceramide d16:1/23:0	Ceramides	0.15	0.17	0.077	0.31	0.12	0.22	0.099	0.064	100	0.033	21
Cer d16:1/24:0	Ceramide d16:1/24:0	Ceramides	0.24	0.26	0.13	0.57	0.18	0.31	0.13	0.1	100	0.01336	21
Cer d18:1/14:0	Ceramide d18:1/14:0	Ceramides	0.089	0.097	0.056	0.17	0.079	0.11	0.034	0.029	67	0.04241	21
Cer d18:1/16:0	Ceramide d18:1/16:0	Ceramides	0.48	0.5	0.38	0.71	0.44	0.55	0.11	0.091	100	0.011415	21
Cer d18:1/18:0	Ceramide d18:1/18:0	Ceramides	0.16	0.17	0.13	0.27	0.14	0.2	0.064	0.04	100	0.00978	21
Cer d18:1/18:0-OH	Ceramide d18:1/18:0-OH	Ceramides			0.22	0.22					4.8	0.2945	21
Cer d18:1/18:1	Ceramide d18:1/18:1	Ceramides	0.036	0.034	0.023	0.049	0.024	0.041	0.017	0.0092	33	0.0271351	21
Cer d18:1/20:0	Ceramide d18:1/20:0	Ceramides	0.12	0.13	0.087	0.21	0.1	0.15	0.045	0.039	100	0.007175	21
Cer d18:1/20:0-OH	Ceramide d18:1/20:0-OH	Ceramides	0.59	0.54	0.24	0.96	0.29	0.73	0.44	0.24	57	0.239	21
Cer d18:1/22:0	Ceramide d18:1/22:0	Ceramides	0.86	0.89	0.61	1.2	0.74	1	0.27	0.19	100	0.010545	21
Cer d18:1/23:0	Ceramide d18:1/23:0	Ceramides	0.94	0.97	0.65	1.9	0.76	1.1	0.34	0.28	100	0.012515	21
Cer d18:1/24:0	Ceramide d18:1/24:0	Ceramides	2.6	2.6	1.6	3.7	2.1	2.9	0.75	0.55	100	0.02399	21
Cer d18:1/24:1	Ceramide d18:1/24:1	Ceramides	1.1	1	0.65	1.6	0.9	1.2	0.27	0.22	100	0.011975	21
Cer d18:1/25:0	Ceramide d18:1/25:0	Ceramides	0.44	0.44	0.21	0.69	0.34	0.55	0.22	0.12	100	0.066815	21
Cer d18:1/26:0	Ceramide d18:1/26:0	Ceramides	0.11	0.1	0.049	0.17	0.071	0.12	0.051	0.032	95	0.024	21
Cer d18:1/26:1	Ceramide d18:1/26:1	Ceramides	0.03	0.033	0.018	0.065	0.022	0.04	0.018	0.014	95	0.0119	21
Cer d18:2/14:0	Ceramide d18:2/14:0	Ceramides			0.016	0.016					4.8	0.01116	21
Cer d18:2/16:0	Ceramide d18:2/16:0	Ceramides	0.11	0.12	0.086	0.18	0.1	0.13	0.034	0.023	100	0.049	21
Cer d18:2/18:0	Ceramide d18:2/18:0	Ceramides	0.082	0.092	0.039	0.16	0.071	0.12	0.046	0.031	100	0.029	21
Cer d18:2/18:1	Ceramide d18:2/18:1	Ceramides			0.019	0.019					4.8	0.01462	21
Cer d18:2/20:0	Ceramide d18:2/20:0	Ceramides	0.071	0.076	0.042	0.11	0.062	0.093	0.031	0.019	100	0.025	21
Cer d18:2/22:0	Ceramide d18:2/22:0	Ceramides	0.3	0.32	0.17	0.51	0.26	0.35	0.097	0.086	100	0.011245	21
Cer d18:2/23:0	Ceramide d18:2/23:0	Ceramides	0.14	0.15	0.091	0.28	0.12	0.17	0.045	0.042	100	0.041	21
Cer d18:2/24:0	Ceramide d18:2/24:0	Ceramides	0.55	0.57	0.31	0.85	0.49	0.64	0.16	0.14	100	0.00689	21
Cer d18:2/24:1	Ceramide d18:2/24:1	Ceramides	0.23	0.23	0.16	0.34	0.18	0.26	0.079	0.048	100	0.005	21
CE 14:0	Cholesteryl ester 14:0	Cholesteryl Esters	18	16	5.3	33	10	19	8.9	7.6	100	0.3075	21
CE 14:1	Cholesteryl ester 14:1	Cholesteryl Esters	0.067	0.073	0.031	0.11	0.049	0.1	0.053	0.03	24	0.144	21
CE 15:0	Cholesteryl ester 15:0	Cholesteryl Esters	5.5	5.8	2.9	12	3.6	7.3	3.7	2.3	100	1.39	21
CE 15:1	Cholesteryl ester 15:1	Cholesteryl Esters	0.66	0.66	0.53	0.78	0.59	0.74	0.16	0.091	24	0.507	21
CE 16:0	Cholesteryl ester 16:0	Cholesteryl Esters	186	183	110	289	142	214	72	45	100	0.938	21
CE 16:1	Cholesteryl ester 16:1	Cholesteryl Esters	33	41	14	83	25	59	34	21	100	9.92	21
CE 17:0	Cholesteryl ester 17:0	Cholesteryl Esters	4.3	5	2.2	12	3.5	5.6	2.1	2.3	100	1.25	21
CE 17:1	Cholesteryl ester 17:1	Cholesteryl Esters	2.9	3	1.1	6	1.9	3.4	1.5	1.3	100	1.06	21
CE 18:0	Cholesteryl ester 18:0	Cholesteryl Esters	13	13	7.3	23	9.6	15	5.1	3.6	100	0.29215	21
CE 18:1	Cholesteryl ester 18:1	Cholesteryl Esters	256	264	173	434	225	282	56	64	100	1.3125	21
CE 18:2	Cholesteryl ester 18:2	Cholesteryl Esters	1256	1265	732	1808	1106	1467	361	269	100	14.28	21
CE 18:3	Cholesteryl ester 18:3	Cholesteryl Esters	49	54	28	89	44	66	22	17	100	0.226	21
CE 20:0	Cholesteryl ester 20:0	Cholesteryl Esters	2.1	2.1	1.8	2.4	1.8			0.3	14	4.413	21
CE 20:1	Cholesteryl ester 20:1	Cholesteryl Esters	0.41	0.45	0.32	0.65	0.34	0.59	0.26	0.14	19	0.618	21
CE 20:3	Cholesteryl ester 20:3	Cholesteryl Esters	17	19	8.9	33	14	23	9.3	6.5	100	0.183	21
CE 20:4	Cholesteryl ester 20:4	Cholesteryl Esters	221	241	116	403	184	297	113	78	100	0.549	21
CE 20:5	Cholesteryl ester 20:5	Cholesteryl Esters	54	69	11	163	36	96	60	45	100	0.4255	21
CE 22:0	Cholesteryl ester 22:0	Cholesteryl Esters									0	0.108	21
CE 22:1	Cholesteryl ester 22:1	Cholesteryl Esters									0	0.147	21
CE 22:2	Cholesteryl ester 22:2	Cholesteryl Esters	0.048	0.16	0.037	0.62	0.038	0.34	0.3	0.26	24	0.169	21
CE 22:5	Cholesteryl ester 22:5	Cholesteryl Esters	2.1	2.5	1.6	4.4	1.9	3.2	1.3	0.79	100	0.88	21
CE 22:6	Cholesteryl ester 22:6	Cholesteryl Esters	40	42	16	76	27	57	30	17	100	0.3	21
p-Cresol-SO4	p-Cresol sulfate	Cresols	40	40	10	72	25	54	29	17	100	0.01	21
DG 14:0_14:0	Diacylglyceride 14:0_14:0	Diglycerides			1.2	1.2					4.8	0.3475	21
DG 14:0_18:1	Diacylglyceride 14:0_18:1	Diglycerides			1.2	1.2					4.8	0.6975	21
DG 14:0_18:2	Diacylglyceride 14:0_18:2	Diglycerides	0.66	0.84	0.33	1.5	0.33			0.63	14	0.334	21
DG 14:0_20:0	Diacylglyceride 14:0_20:0	Diglycerides									0	0.0698	21
DG 14:1_18:1	Diacylglyceride 14:1_18:1	Diglycerides	0.2	0.18	0.11	0.24	0.11			0.068	14	0.09721	21
DG 14:1_20:2	Diacylglyceride 14:1_20:2	Diglycerides	0.54	0.83	0.015	1.9	0.015			0.99	14	0.1135	21
DG 16:0_16:0	Diacylglyceride 16:0_16:0	Diglycerides									0	23.3	21
DG 16:0_16:1	Diacylglyceride 16:0_16:1	Diglycerides	0.68	0.68	0.67	0.69				0.012	9.5	0.2565	21
DG 16:0_18:1	Diacylglyceride 16:0_18:1	Diglycerides	2.3	2.2	0.62	3.9	1.6	2.4	0.84	0.96	76	0.573	21
DG 16:0_18:2	Diacylglyceride 16:0_18:2	Diglycerides	1.2	1.3	0.51	2.6	0.82	1.6	0.75	0.59	100	0.48	21
DG 16:0_20:0	Diacylglyceride 16:0_20:0	Diglycerides									0	0.9455	21
DG 16:0_20:3	Diacylglyceride 16:0_20:3	Diglycerides			0.098	0.098					4.8	0.1155	21
DG 16:0_20:4	Diacylglyceride 16:0_20:4	Diglycerides									0	0.189	21
DG 16:1_18:0	Diacylglyceride 16:1_18:0	Diglycerides	0.094	0.094	0.059	0.13				0.049	9.5	0.125	21
DG 16:1_18:1	Diacylglyceride 16:1_18:1	Diglycerides	1.6	1.8	1.2	2.5	1.3	2.3	1	0.49	38	0.4415	21
DG 16:1_18:2	Diacylglyceride 16:1_18:2	Diglycerides	0.44	0.46	0.15	0.92	0.32	0.55	0.23	0.2	90	0.151	21
DG 16:1_20:0	Diacylglyceride 16:1_20:0	Diglycerides									0	0.234	21
DG 17:0_17:1	Diacylglyceride 17:0_17:1	Diglycerides									0	0.107	21
DG 17:0_18:1	Diacylglyceride 17:0_18:1	Diglycerides	0.47	0.52	0.33	0.89	0.39	0.65	0.26	0.17	100	0.188	21
DG 18:0_20:0	Diacylglyceride 18:0_20:0	Diglycerides									0	0.417	21
DG 18:0_20:4	Diacylglyceride 18:0_20:4	Diglycerides									0	0.1225	21
DG 18:1_18:1	Diacylglyceride 18:1_18:1	Diglycerides	1.5	1.8	0.74	4	1.2	2.6	1.4	0.92	100	0.516	21
DG 18:1_18:2	Diacylglyceride 18:1_18:2	Diglycerides	4.4	4.9	1.6	9.5	3.6	5.4	1.8	1.9	100	1.63	21
DG 18:1_18:3	Diacylglyceride 18:1_18:3	Diglycerides			0.47	0.47					4.8	0.339	21
DG 18:1_18:4	Diacylglyceride 18:1_18:4	Diglycerides									0	0.17015	21
DG 18:1_20:0	Diacylglyceride 18:1_20:0	Diglycerides									0	0.271	21
DG 18:1_20:1	Diacylglyceride 18:1_20:1	Diglycerides			0.042	0.042					4.8	0.0322042	21
DG 18:1_20:2	Diacylglyceride 18:1_20:2	Diglycerides	0.22	0.22	0.17	0.28	0.17			0.057	14	0.119	21
DG 18:1_20:3	Diacylglyceride 18:1_20:3	Diglycerides	0.063	0.065	0.058	0.074	0.058			0.0084	14	0.07755	21
DG 18:1_20:4	Diacylglyceride 18:1_20:4	Diglycerides			0.45	0.45					4.8	0.185	21
DG 18:1_22:5	Diacylglyceride 18:1_22:5	Diglycerides									0	0.0133982	21
DG 18:1_22:6	Diacylglyceride 18:1_22:6	Diglycerides			0.3	0.3					4.8	0.29595	21
DG 18:2_18:2	Diacylglyceride 18:2_18:2	Diglycerides	3.2	3.3	1	6.7	2.3	3.6	1.2	1.4	100	0.605	21
DG 18:2_18:3	Diacylglyceride 18:2_18:3	Diglycerides	0.32	0.35	0.13	0.74	0.3	0.39	0.096	0.14	71	0.152	21
DG 18:2_18:4	Diacylglyceride 18:2_18:4	Diglycerides									0	0.1419	21
DG 18:2_20:0	Diacylglyceride 18:2_20:0	Diglycerides			0.16	0.16					4.8	0.122	21
DG 18:2_20:4	Diacylglyceride 18:2_20:4	Diglycerides									0	0.1805	21
DG 18:3_18:3	Diacylglyceride 18:3_18:3	Diglycerides									0	0.1605	21
DG 18:3_20:2	Diacylglyceride 18:3_20:2	Diglycerides									0	0.176	21
DG 21:0_22:6	Diacylglyceride 21:0_22:6	Diglycerides									0	0.407	21
DG 22:1_22:2	Diacylglyceride 22:1_22:2	Diglycerides			0.001	0.001					4.8	0.1235	21
DG O-14:0_18:2	Diacylglyceride O-14:0_18:2	Diglycerides									0	0.804	21
DG O-16:0_18:1	Diacylglyceride O-16:0_18:1	Diglycerides			0.044	0.044					4.8	0.1255	21
DG O-16:0_20:4	Diacylglyceride O-16:0_20:4	Diglycerides									0	0.0461062	16
DG O-18:2_18:2	Diacylglyceride O-18:2_18:2	Diglycerides									0	0.0829	5
Hex2Cer d18:1/14:0	Dihexosylceramide d18:1/14:0	Dihexosylceramides	0.29	0.31	0.18	0.48	0.23	0.38	0.16	0.091	100	0.0259557	21
Hex2Cer d18:1/16:0	Dihexosylceramide d18:1/16:0	Dihexosylceramides	3	3.2	2	4.6	2.7	3.6	0.92	0.71	100	0.01082	21
Hex2Cer d18:1/18:0	Dihexosylceramide d18:1/18:0	Dihexosylceramides	0.25	0.26	0.2	0.4	0.23	0.28	0.051	0.05	100	0.0339	21
Hex2Cer d18:1/20:0	Dihexosylceramide d18:1/20:0	Dihexosylceramides	0.14	0.14	0.075	0.19	0.12	0.16	0.045	0.03	100	0.105	21
Hex2Cer d18:1/22:0	Dihexosylceramide d18:1/22:0	Dihexosylceramides	0.3	0.32	0.2	0.59	0.24	0.37	0.13	0.093	100	0.077	21
Hex2Cer d18:1/24:0	Dihexosylceramide d18:1/24:0	Dihexosylceramides	0.26	0.27	0.15	0.47	0.2	0.32	0.12	0.08	100	0.133	21
Hex2Cer d18:1/24:1	Dihexosylceramide d18:1/24:1	Dihexosylceramides	0.43	0.47	0.25	0.72	0.37	0.59	0.22	0.14	100	0.003615	21
Hex2Cer d18:1/26:0	Dihexosylceramide d18:1/26:0	Dihexosylceramides	0.0077	0.0074	0.0055	0.0085	0.0059	0.0084	0.0025	0.0013	19	0.006	21
Hex2Cer d18:1/26:1	Dihexosylceramide d18:1/26:1	Dihexosylceramides	0.019	0.023	0.013	0.04	0.015	0.031	0.015	0.01	29	0.606	21
Cer d18:0/18:0	Dihydroceramide d18:0/18:0	Dihydroceramides	0.018	0.019	0.015	0.025	0.015	0.024	0.0091	0.0047	24	0.03455	21
Cer d18:0/18:0-OH	Dihydroceramide d18:0/18:0-OH	Dihydroceramides									0	0.00583	21
Cer d18:0/20:0	Dihydroceramide d18:0/20:0	Dihydroceramides	0.001	0.001	0.0009	0.0011	0.0009	0.0011	0.0002	0.0001	19	0.07019	21
Cer d18:0/22:0	Dihydroceramide d18:0/22:0	Dihydroceramides	0.16	0.16	0.11	0.21	0.12	0.2	0.08	0.041	24	0.097	21
Cer d18:0/24:0	Dihydroceramide d18:0/24:0	Dihydroceramides	0.32	0.36	0.18	0.63	0.27	0.45	0.18	0.13	100	0.093	21
Cer d18:0/24:1	Dihydroceramide d18:0/24:1	Dihydroceramides	0.24	0.26	0.14	0.57	0.18	0.33	0.15	0.11	100	0.402	21
Cer d18:0/26:1	Dihydroceramide d18:0/26:1	Dihydroceramides			0.018	0.018					4.8	0.8	21
Cer d18:0/26:1-OH	Dihydroceramide d18:0/26:1-OH	Dihydroceramides			0.52	0.52					4.8	0.035385	21
FA 12:0	Dodecanoic acid	Fatty Acids			39	39					4.8	228.567	21
FA 14:0	Myristic acid	Fatty Acids	207	207	192	221				21	9.5	738.192	21
FA 16:0	Palmitic acid	Fatty Acids									0	690.389	21
FA 18:0	Stearic acid	Fatty Acids									0	64	21
FA 18:1	Octadecenoic acid	Fatty Acids	166	189	86	407	125	237	112	82	100	3.4155	21
FA 18:2	Octadecadienoic acid	Fatty Acids	46	50	22	113	35	54	18	23	100	0.515	21
FA 20:1	Eicosenoic acid	Fatty Acids	1.7	2	0.72	4.8	1.4	2.2	0.85	1.1	100	0.6955	21
FA 20:2	Eicosadienoic acid	Fatty Acids	1.4	1.6	0.52	4	1.1	2.1	1	0.89	100	0.25	21
FA 20:3	Eicosatrienoic acid	Fatty Acids	0.56	0.72	0.33	1.5	0.47	0.99	0.52	0.37	100	0.0123	21
FA 20:4	Arachidonic acid	Fatty Acids	4.9	5.4	1.5	10	4.1	6.7	2.5	2.2	81	1.681	21
FA 20:5	Eicosapentaenoic acid	Fatty Acids	0.53	0.78	0.12	3.7	0.33	1	0.68	0.8	95	16.493	21
FA 22:6	Docosahexaenoic acid	Fatty Acids	7.2	9.5	1.9	37	5.2	11	6	7.9	100	0.117	21
Hex-Cer d16:1/20:0	Hexosylceramide d16:1/20:0	Hexosylceramides	0.048	0.049	0.034	0.062	0.04	0.058	0.018	0.01	100	0.017	5
Hex-Cer d16:1/22:0	Hexosylceramide d16:1/22:0	Hexosylceramides	0.054	0.057	0.029	0.098	0.045	0.068	0.023	0.018	100	0.0148	21
Hex-Cer d16:1/24:0	Hexosylceramide d16:1/24:0	Hexosylceramides	0.045	0.047	0.024	0.066	0.038	0.058	0.02	0.013	90	0.02585	21
Hex-Cer d18:1/14:0	Hexosylceramide d18:1/14:0	Hexosylceramides	0.035	0.035	0.023	0.055	0.025	0.044	0.019	0.012	29	0.0198	21
Hex-Cer d18:1/16:0	Hexosylceramide d18:1/16:0	Hexosylceramides	1.2	1.3	0.79	1.9	0.99	1.5	0.5	0.33	100	0.0707	21
Hex-Cer d18:1/18:0	Hexosylceramide d18:1/18:0	Hexosylceramides	0.22	0.23	0.14	0.34	0.19	0.26	0.069	0.056	100	0.0319	21
Hex-Cer d18:1/18:1	Hexosylceramide d18:1/18:1	Hexosylceramides	0.11	0.11	0.069	0.16	0.078	0.13	0.049	0.026	100	0.103	21
Hex-Cer d18:1/20:0	Hexosylceramide d18:1/20:0	Hexosylceramides	0.29	0.31	0.17	0.46	0.22	0.37	0.15	0.088	100	0.03776	21
Hex-Cer d18:1/22:0	Hexosylceramide d18:1/22:0	Hexosylceramides	3.4	3.5	2.1	4.9	3	4	1	0.75	100	0.03923	21
Hex-Cer d18:1/23:0	Hexosylceramide d18:1/23:0	Hexosylceramides	1.6	1.7	0.99	2.5	1.4	1.8	0.47	0.4	100	0.023905	21
Hex-Cer d18:1/24:0	Hexosylceramide d18:1/24:0	Hexosylceramides	1.8	1.8	1.2	2.6	1.6	2	0.45	0.38	100	0.1495	21
Hex-Cer d18:1/24:1	Hexosylceramide d18:1/24:1	Hexosylceramides	3.9	4	2.8	6.5	3.3	4.5	1.2	0.88	100	0.03788	21
Hex-Cer d18:1/26:0	Hexosylceramide d18:1/26:0	Hexosylceramides	0.097	0.096	0.048	0.14	0.081	0.11	0.028	0.022	81	0.050635	21
Hex-Cer d18:1/26:1	Hexosylceramide d18:1/26:1	Hexosylceramides	0.1	0.1	0.061	0.15	0.072	0.14	0.067	0.035	43	0.009915	21
Hex-Cer d18:2/16:0	Hexosylceramide d18:2/16:0	Hexosylceramides	0.014	0.014	0.0099	0.017	0.012	0.016	0.004	0.0024	24	0.01368	21
Hex-Cer d18:2/18:0	Hexosylceramide d18:2/18:0	Hexosylceramides	0.037	0.036	0.022	0.054	0.027	0.046	0.019	0.0099	100	0.014665	21
Hex-Cer d18:2/20:0	Hexosylceramide d18:2/20:0	Hexosylceramides	0.016	0.015	0.013	0.019	0.013	0.017	0.0044	0.0025	24	0.176	21
Hex-Cer d18:2/22:0	Hexosylceramide d18:2/22:0	Hexosylceramides	0.72	0.74	0.49	1.2	0.58	0.83	0.25	0.18	100	0.0856	21
Hex-Cer d18:2/23:0	Hexosylceramide d18:2/23:0	Hexosylceramides	0.33	0.37	0.22	0.72	0.29	0.44	0.15	0.13	100	0.333	21
Hex-Cer d18:2/24:0	Hexosylceramide d18:2/24:0	Hexosylceramides	0.91	0.91	0.56	1.4	0.73	1	0.3	0.22	100	0.01	21
AbsAcid	Abscisic acid	Hormones and Related									0	0.05813	21
Cortisol	Cortisol	Hormones and Related	0.33	0.34	0.15	0.6	0.2	0.48	0.28	0.14	100	0.06498	21
Cortisone	Cortisone	Hormones and Related	0.1	0.098	0.07	0.12	0.087	0.11	0.021	0.016	52	0.0851258	21
DHEAS	Dehydroepiandrosterone sulfate	Hormones and Related	1.5	1.5	0.35	2.7	1	1.8	0.73	0.58	100	0.018	21
3-IAA	Indoleacetic acid	Indoles and Derivatives	1.7	1.8	0.58	5.3	1.1	1.8	0.72	1	100	0.0625	21
3-IPA	Indolepropionic acid	Indoles and Derivatives	0.68	0.96	0.056	5.4	0.32	1.1	0.79	1.1	100	0.0110957	21
Indole	Indole	Indoles and Derivatives									0	12.1905	21
Ind-SO4	Indoxyl sulfate	Indoles and Derivatives	6.3	6.1	2.1	10	4.4	7.9	3.5	2.4	100	78	21
LPC 14:0	Lysophosphatidylcholine 14:0	Lysophosphatidylcholines	6.9	10	4.4	23	4.8	18	13	7.6	24	0.2525	21
LPC 16:0	Lysophosphatidylcholine 16:0	Lysophosphatidylcholines	94	99	58	153	72	126	54	29	100	0.079	21
LPC 16:1	Lysophosphatidylcholine 16:1	Lysophosphatidylcholines	2.1	2.5	1.4	6	1.8	3	1.1	1	100	0.04279	21
LPC 17:0	Lysophosphatidylcholine 17:0	Lysophosphatidylcholines	1.5	1.7	0.9	3.1	1.3	2.3	0.96	0.59	100	0.4095	21
LPC 18:0	Lysophosphatidylcholine 18:0	Lysophosphatidylcholines	30	31	16	53	23	38	15	9.3	100	0.142	21
LPC 18:1	Lysophosphatidylcholine 18:1	Lysophosphatidylcholines	20	20	12	29	14	25	10	5.5	100	0.214	21
LPC 18:2	Lysophosphatidylcholine 18:2	Lysophosphatidylcholines	33	34	19	72	25	40	15	12	100	0.156	21
LPC 20:3	Lysophosphatidylcholine 20:3	Lysophosphatidylcholines	1.8	1.8	0.92	3	1.3	2.1	0.83	0.56	100	0.058535	21
LPC 20:4	Lysophosphatidylcholine 20:4	Lysophosphatidylcholines	6.6	6.6	3	13	5.1	8	2.9	2.2	100	0.0727	21
LPC 24:0	Lysophosphatidylcholine 24:0	Lysophosphatidylcholines	0.17	0.17	0.084	0.23	0.15	0.2	0.05	0.034	100	0.0895	21
LPC 26:0	Lysophosphatidylcholine 26:0	Lysophosphatidylcholines	0.2	0.2	0.13	0.32	0.15	0.24	0.091	0.059	86	0.0619	21
LPC 26:1	Lysophosphatidylcholine 26:1	Lysophosphatidylcholines	0.17	0.18	0.11	0.28	0.14	0.21	0.07	0.046	100	0.166	21
Hypoxanthine	Hypoxanthine	Nucleobases and Related	2.9	2.9	0.77	9.1	2.1	3.4	1.3	1.9	86	0.4	21
Xanthine	Xanthine	Nucleobases and Related	0.55	0.63	0.46	0.92	0.49	0.82	0.33	0.18	43	0.03922	21
PC 24:0	Phosphatidylcholine 24:0	Phosphatidylcholines	0.086	0.12	0.047	0.26	0.076	0.15	0.078	0.071	33	0.8725	21
PC 26:0	Phosphatidylcholine 26:0	Phosphatidylcholines	1.6	1.6	1	2.1				0.79	9.5	0.03336	21
PC 28:1	Phosphatidylcholine 28:1	Phosphatidylcholines	3.5	3.7	2.1	6	3.1	4.2	1	0.94	100	0.122	21
PC 30:0	Phosphatidylcholine 30:0	Phosphatidylcholines	4.7	4.5	2	7.2	3	5.6	2.6	1.5	100	0.02949	21
PC 30:2	Phosphatidylcholine 30:2	Phosphatidylcholines									0	0.0151042	16
PC 32:0	Phosphatidylcholine 32:0	Phosphatidylcholines	14	13	7.2	20	10	16	5.6	3.5	100	0.48	21
PC 32:1	Phosphatidylcholine 32:1	Phosphatidylcholines	9.7	12	2	36	5.7	15	9.2	8.2	100	0.00633	21
PC 32:2	Phosphatidylcholine 32:2	Phosphatidylcholines	4.4	5.1	1.5	13	2.8	6.5	3.7	3.2	100	0.096345	21
PC 32:3	Phosphatidylcholine 32:3	Phosphatidylcholines	0.64	0.7	0.51	0.98	0.57	0.83	0.25	0.15	100	0.174	21
PC 34:1	Phosphatidylcholine 34:1	Phosphatidylcholines	171	169	69	258	130	218	88	51	100	0.061205	21
PC 34:2	Phosphatidylcholine 34:2	Phosphatidylcholines	381	373	245	519	319	415	95	75	100	0.0141726	21
PC 34:3	Phosphatidylcholine 34:3	Phosphatidylcholines	15	16	9.2	26	13	18	5	4.4	100	0.282	21
PC 34:4	Phosphatidylcholine 34:4	Phosphatidylcholines	2	2.1	0.79	3.8	1.4	2.6	1.2	0.81	100	0.04206	21
PC 36:0	Phosphatidylcholine 36:0	Phosphatidylcholines	1.5	1.8	0.43	3.9	1.1	2.5	1.4	0.89	95	0.1185	21
PC 36:1	Phosphatidylcholine 36:1	Phosphatidylcholines	42	42	26	67	36	46	10	9.2	100	0.05691	21
PC 36:2	Phosphatidylcholine 36:2	Phosphatidylcholines	222	228	133	311	191	268	77	46	100	0.083375	21
PC 36:3	Phosphatidylcholine 36:3	Phosphatidylcholines	128	125	71	185	102	143	41	30	100	0.027775	21
PC 36:4	Phosphatidylcholine 36:4	Phosphatidylcholines	182	189	110	298	154	232	78	53	100	0.00875	21
PC 36:5	Phosphatidylcholine 36:5	Phosphatidylcholines	19	23	5.7	72	14	27	13	14	100	0.97	21
PC 36:6	Phosphatidylcholine 36:6	Phosphatidylcholines	0.88	1	0.35	2.3	0.63	1.2	0.59	0.48	100	0.03304	21
PC 38:0	Phosphatidylcholine 38:0	Phosphatidylcholines	2.7	2.9	1.4	5.3	2.1	3.4	1.3	1.1	100	0.05754	21
PC 38:1	Phosphatidylcholine 38:1	Phosphatidylcholines	0.66	0.7	0.33	1.2	0.44	0.87	0.43	0.29	100	0.0385	16
PC 38:3	Phosphatidylcholine 38:3	Phosphatidylcholines	39	39	24	60	32	44	12	9.6	100	0.035	21
PC 38:4	Phosphatidylcholine 38:4	Phosphatidylcholines	100	104	58	172	89	117	28	25	100	0.4305	21
PC 38:5	Phosphatidylcholine 38:5	Phosphatidylcholines	45	50	27	82	39	61	22	14	100	0.016525	21
PC 38:6	Phosphatidylcholine 38:6	Phosphatidylcholines	68	74	40	132	54	96	42	25	100	0.19	21
PC 40:1	Phosphatidylcholine 40:1	Phosphatidylcholines	0.6	0.63	0.59	0.72	0.59			0.071	14	0.0192925	21
PC 40:2	Phosphatidylcholine 40:2	Phosphatidylcholines	0.28	0.28	0.17	0.44	0.23	0.32	0.085	0.061	100	0.033	21
PC 40:3	Phosphatidylcholine 40:3	Phosphatidylcholines	0.44	0.45	0.3	0.69	0.41	0.48	0.073	0.089	100	0.219	21
PC 40:4	Phosphatidylcholine 40:4	Phosphatidylcholines	2.5	2.9	1.3	4.7	2.1	3.6	1.6	1	100	0.0424	21
PC 40:5	Phosphatidylcholine 40:5	Phosphatidylcholines	6.6	7.6	4.5	12	5.8	10	4.4	2.3	100	0.01122	21
PC 40:6	Phosphatidylcholine 40:6	Phosphatidylcholines	23	23	14	41	16	27	11	7.8	100	0.119	21
PC 42:0	Phosphatidylcholine 42:0	Phosphatidylcholines	0.47	0.52	0.34	1.2	0.4	0.56	0.16	0.2	100	0.01136	21
PC 42:1	Phosphatidylcholine 42:1	Phosphatidylcholines	0.27	0.29	0.2	0.63	0.22	0.31	0.096	0.11	100	0.011	21
PC 42:2	Phosphatidylcholine 42:2	Phosphatidylcholines	0.24	0.24	0.17	0.44	0.19	0.27	0.081	0.063	100	0.17	21
PC 42:4	Phosphatidylcholine 42:4	Phosphatidylcholines	0.16	0.17	0.12	0.24	0.15	0.19	0.044	0.031	100	0.135	21
PC 42:5	Phosphatidylcholine 42:5	Phosphatidylcholines	0.28	0.29	0.16	0.44	0.24	0.33	0.087	0.064	100	0.033	21
PC 42:6	Phosphatidylcholine 42:6	Phosphatidylcholines	0.43	0.44	0.25	0.65	0.34	0.55	0.21	0.12	100	0.05	21
PC O-28:0	Phosphatidylcholine O-28:0	Phosphatidylcholines	0.31	0.35	0.22	0.52	0.27	0.43	0.16	0.097	62	0.13	21
PC O-28:1	Phosphatidylcholine O-28:1	Phosphatidylcholines	0.38	0.38	0.21	0.56	0.34	0.45	0.11	0.092	100	0.495	21
PC O-30:0	Phosphatidylcholine O-30:0	Phosphatidylcholines	0.36	0.36	0.18	0.55	0.29	0.44	0.15	0.1	100	0.00852	21
PC O-30:1	Phosphatidylcholine O-30:1	Phosphatidylcholines	0.25	0.34	0.05	0.88	0.18	0.48	0.3	0.25	48	0.026175	21
PC O-30:2	Phosphatidylcholine O-30:2	Phosphatidylcholines	0.11	0.12	0.082	0.17	0.094	0.14	0.042	0.027	100	0.015695	21
PC O-32:1	Phosphatidylcholine O-32:1	Phosphatidylcholines	2.7	2.8	1.5	4.4	2.3	3.2	0.91	0.7	100	0.01855	21
PC O-32:2	Phosphatidylcholine O-32:2	Phosphatidylcholines	0.87	0.82	0.51	1.3	0.66	0.9	0.24	0.18	100	0.017	21
PC O-34:0	Phosphatidylcholine O-34:0	Phosphatidylcholines	1.3	1.3	0.55	2.7	1.1	1.6	0.57	0.48	100	0.027135	21
PC O-34:1	Phosphatidylcholine O-34:1	Phosphatidylcholines	8.1	8.5	4.7	14	7.2	10	3.1	2.2	100	0.335	21
PC O-34:2	Phosphatidylcholine O-34:2	Phosphatidylcholines	12	12	7.9	19	9.4	14	5	3.2	100	2.82	21
PC O-34:3	Phosphatidylcholine O-34:3	Phosphatidylcholines	11	10	6.5	17	7.5	12	4.3	2.8	100	0.040903	21
PC O-36:0	Phosphatidylcholine O-36:0	Phosphatidylcholines	0.73	0.78	0.43	1.2	0.63	0.94	0.3	0.21	100	0.01898	21
PC O-36:1	Phosphatidylcholine O-36:1	Phosphatidylcholines	6.2	6.6	3.9	11	5.6	7.4	1.9	1.7	100	0.030305	21
PC O-36:2	Phosphatidylcholine O-36:2	Phosphatidylcholines	14	13	7.6	22	9.7	15	5.2	3.5	100	0.01406	21
PC O-36:3	Phosphatidylcholine O-36:3	Phosphatidylcholines	7.5	7.7	5.4	12	6.1	9.2	3.1	1.9	100	0.685	21
PC O-36:4	Phosphatidylcholine O-36:4	Phosphatidylcholines	17	17	11	31	15	19	4.1	4.8	100	0.0099198	21
PC O-36:5	Phosphatidylcholine O-36:5	Phosphatidylcholines	12	13	6.5	23	9.9	15	4.9	3.9	100	0.00937	21
PC O-38:0	Phosphatidylcholine O-38:0	Phosphatidylcholines	2.1	2.1	1	3.9	1.5	2.8	1.2	0.83	100	0.013125	21
PC O-38:1	Phosphatidylcholine O-38:1	Phosphatidylcholines	0.37	0.35	0.057	0.51	0.25	0.47	0.22	0.13	81	0.02148	21
PC O-38:2	Phosphatidylcholine O-38:2	Phosphatidylcholines	1.7	1.6	0.99	2.5	1.3	1.9	0.66	0.42	100	0.028935	21
PC O-38:3	Phosphatidylcholine O-38:3	Phosphatidylcholines	3	3.1	1.9	5.4	2.7	3.5	0.81	0.75	100	0.010565	21
PC O-38:4	Phosphatidylcholine O-38:4	Phosphatidylcholines	11	12	7.5	21	9.1	13	4	3.3	100	0.0110284	21
PC O-38:5	Phosphatidylcholine O-38:5	Phosphatidylcholines	15	17	11	30	14	18	4.3	4.3	100	0.017	21
PC O-38:6	Phosphatidylcholine O-38:6	Phosphatidylcholines	7.6	7.6	4.1	12	5.7	9.1	3.4	2.5	100	0.020575	21
PC O-40:1	Phosphatidylcholine O-40:1	Phosphatidylcholines	1.2	1.3	0.85	2.3	1.1	1.5	0.33	0.33	100	0.063	21
PC O-40:2	Phosphatidylcholine O-40:2	Phosphatidylcholines	1.4	1.5	0.8	2.1	1.2	1.7	0.41	0.33	100	0.014	21
PC O-40:3	Phosphatidylcholine O-40:3	Phosphatidylcholines	0.86	0.88	0.52	1.4	0.76	0.96	0.19	0.2	100	0.0194	21
PC O-40:4	Phosphatidylcholine O-40:4	Phosphatidylcholines	2	2.1	1.4	3.8	1.7	2.2	0.47	0.5	100	0.696	21
PC O-40:5	Phosphatidylcholine O-40:5	Phosphatidylcholines	2.7	3	2.4	5.3	2.5	3.2	0.66	0.7	100	0.08374	21
PC O-40:6	Phosphatidylcholine O-40:6	Phosphatidylcholines	3.9	4.1	2.2	7.7	3.2	5	1.8	1.3	100	0.02857	21
PC O-42:0	Phosphatidylcholine O-42:0	Phosphatidylcholines	0.41	0.47	0.4	0.61	0.4			0.12	14	0.01807	21
PC O-42:1	Phosphatidylcholine O-42:1	Phosphatidylcholines	0.38	0.36	0.23	0.47	0.29	0.4	0.11	0.068	100	0.167	21
PC O-42:2	Phosphatidylcholine O-42:2	Phosphatidylcholines	0.48	0.49	0.32	0.79	0.41	0.54	0.13	0.13	100	0.673	21
PC O-42:3	Phosphatidylcholine O-42:3	Phosphatidylcholines	0.68	0.73	0.35	1.5	0.61	0.78	0.18	0.22	100	0.06	21
PC O-42:4	Phosphatidylcholine O-42:4	Phosphatidylcholines	0.77	0.77	0.47	1.2	0.7	0.82	0.11	0.18	100	0.118	21
PC O-42:5	Phosphatidylcholine O-42:5	Phosphatidylcholines	1.5	1.7	1.1	2.9	1.4	1.8	0.43	0.4	100	0.072785	21
PC O-44:3	Phosphatidylcholine O-44:3	Phosphatidylcholines	0.11	0.12	0.085	0.21	0.096	0.13	0.035	0.029	100	0.07648	21
PC O-44:4	Phosphatidylcholine O-44:4	Phosphatidylcholines	0.26	0.27	0.19	0.39	0.23	0.31	0.074	0.055	95	0.02028	21
PC O-44:5	Phosphatidylcholine O-44:5	Phosphatidylcholines	1.1	1.1	0.51	1.6	0.93	1.3	0.42	0.27	100	0.004	21
PC O-44:6	Phosphatidylcholine O-44:6	Phosphatidylcholines	1.1	1.1	0.65	1.8	0.95	1.3	0.37	0.28	100	0.021	21
SM 33:1	Sphingomyelin 33:1	Sphingomyelins	5.2	5.4	3	9.9	4.1	6.5	2.4	1.6	100	0.009	21
SM 34:1	Sphingomyelin 34:1	Sphingomyelins	103	102	75	147	86	111	25	19	100	0.009	21
SM 34:2	Sphingomyelin 34:2	Sphingomyelins	15	15	12	23	13	17	4.2	3	100	0.005	21
SM 35:1	Sphingomyelin 35:1	Sphingomyelins	2.7	3	1.5	5.3	2.5	3.4	0.84	0.85	100	0.00719	21
SM 36:1	Sphingomyelin 36:1	Sphingomyelins	20	21	14	31	18	23	5	4.4	100	0.032	21
SM 36:2	Sphingomyelin 36:2	Sphingomyelins	10	10	6.8	16	9.5	11	1.6	2	100	0.031	21
SM 38:3	Sphingomyelin 38:3	Sphingomyelins	0.44	0.46	0.26	0.82	0.34	0.55	0.21	0.14	100	0.045	21
SM 40:4	Sphingomyelin 40:4	Sphingomyelins	0.076	0.079	0.03	0.14	0.041	0.11	0.07	0.039	44	0.0044	16
SM 41:1	Sphingomyelin 41:1	Sphingomyelins	11	11	6	18	8.8	13	3.8	2.8	100	0.08305	21
SM 41:2	Sphingomyelin 41:2	Sphingomyelins	8.3	8.8	5.3	16	7.2	10	2.8	2.6	100	0.032	21
SM 42:1	Sphingomyelin 42:1	Sphingomyelins	17	17	11	23	14	19	4.4	3.2	100	0.159	21
SM 42:2	Sphingomyelin 42:2	Sphingomyelins	36	36	21	51	31	41	11	7.6	100	0.325	21
SM 43:1	Sphingomyelin 43:1	Sphingomyelins	0.91	0.92	0.49	1.3	0.79	1.1	0.34	0.22	100	0.0216186	21
SM 44:1	Sphingomyelin 44:1	Sphingomyelins	0.12	0.12	0.062	0.19	0.093	0.15	0.059	0.037	100	0.629	21
SM 44:2	Sphingomyelin 44:2	Sphingomyelins	0.25	0.25	0.14	0.42	0.2	0.3	0.093	0.068	100	0.189	21
TG 14:0_32:2	Triacylglyceride 14:0_32:2	Triglycerides	1.4	1.9	0.051	8.9	0.66	1.8	1.2	2.2	71	0.216	21
TG 14:0_34:0	Triacylglyceride 14:0_34:0	Triglycerides	2	2.2	0.087	6	0.85	2.7	1.9	1.8	67	0.26075	21
TG 14:0_34:1	Triacylglyceride 14:0_34:1	Triglycerides	5.8	11	0.63	38	2.9	17	14	11	100	0.1175	21
TG 14:0_34:2	Triacylglyceride 14:0_34:2	Triglycerides	5.2	8	0.74	28	2.5	11	9	7.9	100	0.214	21
TG 14:0_34:3	Triacylglyceride 14:0_34:3	Triglycerides	1.2	1.9	0.23	7	0.65	2.6	2	1.8	100	1.075	21
TG 14:0_35:1	Triacylglyceride 14:0_35:1	Triglycerides	0.47	0.58	0.045	1.4	0.29	0.91	0.62	0.4	62	1.585	21
TG 14:0_35:2	Triacylglyceride 14:0_35:2	Triglycerides	0.5	0.59	0.088	1.5	0.32	0.85	0.53	0.38	57	0.108	21
TG 14:0_36:1	Triacylglyceride 14:0_36:1	Triglycerides	1.7	2.5	0.21	6.1	1.1	4.1	3.1	1.9	100	0.0715	21
TG 14:0_36:2	Triacylglyceride 14:0_36:2	Triglycerides	9.8	12	1.7	27	6.2	19	13	8	100	0.0981	21
TG 14:0_36:3	Triacylglyceride 14:0_36:3	Triglycerides	9.8	13	3.3	28	7.2	20	12	7.1	100	0.0470066	21
TG 14:0_36:4	Triacylglyceride 14:0_36:4	Triglycerides	4.1	5	1.8	11	3	7.5	4.5	2.7	100	0.16	21
TG 14:0_38:4	Triacylglyceride 14:0_38:4	Triglycerides	0.38	0.45	0.086	1.3	0.23	0.64	0.41	0.3	95	0.204	21
TG 14:0_38:5	Triacylglyceride 14:0_38:5	Triglycerides	0.39	0.5	0.15	1.6	0.19	0.76	0.57	0.36	100	0.33	21
TG 14:0_39:3	Triacylglyceride 14:0_39:3	Triglycerides									0	0.379	16
TG 14:0_40:5	Triacylglyceride 14:0_40:5	Triglycerides	0.35	0.72	0.15	2.1	0.19	1.4	1.2	0.81	100	0.216	5
TG 16:0_28:1	Triacylglyceride 16:0_28:1	Triglycerides	1.2	3.4	0.26	22	0.78	2.2	1.4	6.6	48	0.246	21
TG 16:0_28:2	Triacylglyceride 16:0_28:2	Triglycerides	0.45	1.1	0.097	9.1	0.28	0.84	0.56	2.4	62	0.08682	21
TG 16:0_30:2	Triacylglyceride 16:0_30:2	Triglycerides	0.83	3.1	0.083	30	0.52	3.8	3.2	6.6	95	0.441	21
TG 16:0_32:0	Triacylglyceride 16:0_32:0	Triglycerides	7.8	12	0.54	38	3.9	18	14	11	81	0.145	21
TG 16:0_32:1	Triacylglyceride 16:0_32:1	Triglycerides	11	19	0.72	73	4	27	23	20	100	0.701	21
TG 16:0_32:2	Triacylglyceride 16:0_32:2	Triglycerides	6.1	9.7	0.77	37	2.7	15	12	9.9	100	0.823	21
TG 16:0_32:3	Triacylglyceride 16:0_32:3	Triglycerides	1	1.7	0.18	6	0.48	2.6	2.1	1.6	100	0.491	21
TG 16:0_33:1	Triacylglyceride 16:0_33:1	Triglycerides	1.8	2.6	0.072	8.9	1	3.6	2.6	2.3	95	0.207	21
TG 16:0_33:2	Triacylglyceride 16:0_33:2	Triglycerides	0.96	1.4	0.14	3.8	0.78	2	1.2	1	90	0.332	21
TG 16:0_34:0	Triacylglyceride 16:0_34:0	Triglycerides	8.4	9.6	0.88	28	3.4	15	12	7.8	95	0.269	21
TG 16:0_34:1	Triacylglyceride 16:0_34:1	Triglycerides	65	65	8.3	180	23	98	75	50	100	0.166	21
TG 16:0_34:2	Triacylglyceride 16:0_34:2	Triglycerides	55	58	8.2	154	24	83	59	41	100	0.08668	21
TG 16:0_34:3	Triacylglyceride 16:0_34:3	Triglycerides	15	17	2.6	43	7.6	25	17	12	100	0.596	21
TG 16:0_34:4	Triacylglyceride 16:0_34:4	Triglycerides	1.4	1.9	0.38	4.6	0.71	3	2.3	1.3	100	0.508	21
TG 16:0_35:1	Triacylglyceride 16:0_35:1	Triglycerides	1.5	2.1	0.19	6	1	2.9	1.8	1.7	95	0.277	21
TG 16:0_35:2	Triacylglyceride 16:0_35:2	Triglycerides	2.3	2.8	0.41	7.5	1.4	3.9	2.5	2.1	100	0.088265	21
TG 16:0_35:3	Triacylglyceride 16:0_35:3	Triglycerides	1.1	1.3	0.28	3.6	0.76	1.7	0.91	0.87	100	0.185	21
TG 16:0_36:2	Triacylglyceride 16:0_36:2	Triglycerides	116	128	36	288	70	179	109	73	100	0.141	21
TG 16:0_36:3	Triacylglyceride 16:0_36:3	Triglycerides	142	150	47	308	93	196	102	73	100	0.186	21
TG 16:0_36:4	Triacylglyceride 16:0_36:4	Triglycerides	51	60	19	117	45	72	27	26	100	0.333	21
TG 16:0_36:5	Triacylglyceride 16:0_36:5	Triglycerides	6.2	7.7	3.9	18	4.7	11	5.9	3.8	100	0.655	21
TG 16:0_36:6	Triacylglyceride 16:0_36:6	Triglycerides	0.54	0.8	0.34	2	0.39	1.1	0.71	0.51	100	0.71	21
TG 16:0_37:3	Triacylglyceride 16:0_37:3	Triglycerides	0.47	0.6	0.25	1.3	0.32	0.79	0.47	0.31	81	0.072	21
TG 16:0_38:1	Triacylglyceride 16:0_38:1	Triglycerides	0.67	0.63	0.18	1.1	0.43	0.84	0.41	0.28	76	0.06085	21
TG 16:0_38:2	Triacylglyceride 16:0_38:2	Triglycerides	1.4	1.6	0.47	3	0.84	2.2	1.4	0.81	100	0.176	21
TG 16:0_38:3	Triacylglyceride 16:0_38:3	Triglycerides	2.7	2.9	0.66	6.3	1.5	4.1	2.6	1.6	100	0.07978	21
TG 16:0_38:4	Triacylglyceride 16:0_38:4	Triglycerides	3.9	3.7	0.71	7.7	2	5.2	3.1	1.9	100	0.14235	21
TG 16:0_38:5	Triacylglyceride 16:0_38:5	Triglycerides	4.2	4.3	0.81	9	2.5	5.9	3.4	2.1	100	0.0785	21
TG 16:0_38:6	Triacylglyceride 16:0_38:6	Triglycerides	2.5	2.7	0.8	5.9	1.6	3.6	2	1.4	100	0.1395	21
TG 16:0_38:7	Triacylglyceride 16:0_38:7	Triglycerides	0.81	0.87	0.38	2.3	0.43	1.2	0.75	0.53	90	0.219	21
TG 16:0_40:6	Triacylglyceride 16:0_40:6	Triglycerides	2.4	2.2	0.6	4.8	1.5	2.9	1.4	1.1	100	0.100895	21
TG 16:0_40:7	Triacylglyceride 16:0_40:7	Triglycerides	2.3	2.5	0.88	5.4	1.5	3.1	1.6	1.3	100	0.0718	21
TG 16:0_40:8	Triacylglyceride 16:0_40:8	Triglycerides	1.1	1.3	0.36	2.9	0.68	1.7	1	0.68	100	0.05202	21
TG 16:1_28:0	Triacylglyceride 16:1_28:0	Triglycerides	0.63	1.8	0.028	12	0.42	1.3	0.89	3.7	48	0.441	21
TG 16:1_30:1	Triacylglyceride 16:1_30:1	Triglycerides	1.4	2.3	0.036	12	0.78	2	1.2	3.4	57	0.183	21
TG 16:1_32:0	Triacylglyceride 16:1_32:0	Triglycerides	3	4.7	0.052	16	1.8	5	3.2	4.7	76	0.367	21
TG 16:1_32:1	Triacylglyceride 16:1_32:1	Triglycerides	4.2	6.3	0.11	26	2.4	7.3	4.9	6.6	81	0.233	21
TG 16:1_32:2	Triacylglyceride 16:1_32:2	Triglycerides	1.3	2	0.024	7.7	0.94	2.3	1.3	2.1	90	0.101	21
TG 16:1_33:1	Triacylglyceride 16:1_33:1	Triglycerides	0.58	0.85	0.39	2.8	0.48	1	0.55	0.64	76	0.165	21
TG 16:1_34:0	Triacylglyceride 16:1_34:0	Triglycerides	2.6	3.1	0.17	11	0.97	4	3	2.6	90	0.218	21
TG 16:1_34:1	Triacylglyceride 16:1_34:1	Triglycerides	22	22	1.9	88	7.2	30	23	20	100	0.1515	21
TG 16:1_34:2	Triacylglyceride 16:1_34:2	Triglycerides	14	15	2.1	45	7.3	20	12	11	100	0.087	21
TG 16:1_34:3	Triacylglyceride 16:1_34:3	Triglycerides	2.5	3.1	0.51	8.1	1.7	4	2.2	2	100	0.049255	21
TG 16:1_36:1	Triacylglyceride 16:1_36:1	Triglycerides	2.5	3.1	0.52	7	1.7	4.5	2.9	1.9	100	0.14	21
TG 16:1_36:2	Triacylglyceride 16:1_36:2	Triglycerides	14	16	4	34	9.8	23	13	8	100	0.147	21
TG 16:1_36:3	Triacylglyceride 16:1_36:3	Triglycerides	17	18	6	36	13	22	9	7.6	100	0.22	21
TG 16:1_36:4	Triacylglyceride 16:1_36:4	Triglycerides	7	7.4	2.8	15	5.4	8.1	2.7	2.8	100	0.225	21
TG 16:1_36:5	Triacylglyceride 16:1_36:5	Triglycerides	1.2	1.2	0.67	2.2	0.9	1.5	0.61	0.39	100	0.121	21
TG 16:1_38:3	Triacylglyceride 16:1_38:3	Triglycerides	0.41	0.5	0.17	1	0.32	0.74	0.42	0.24	100	0.177	21
TG 16:1_38:4	Triacylglyceride 16:1_38:4	Triglycerides	0.69	0.69	0.2	1.2	0.44	0.9	0.46	0.28	100	0.796	21
TG 16:1_38:5	Triacylglyceride 16:1_38:5	Triglycerides	0.89	0.86	0.22	1.5	0.5	1.3	0.8	0.41	100	0.473	21
TG 17:0_32:1	Triacylglyceride 17:0_32:1	Triglycerides	0.71	0.73	0.037	1.5	0.48	1.1	0.58	0.44	52	0.05679	21
TG 17:0_34:1	Triacylglyceride 17:0_34:1	Triglycerides	1.6	2	0.33	5.4	0.89	2.5	1.6	1.5	95	0.183	21
TG 17:0_34:2	Triacylglyceride 17:0_34:2	Triglycerides	1.3	1.6	0.45	3.9	0.78	1.9	1.2	1	100	0.2255	21
TG 17:0_34:3	Triacylglyceride 17:0_34:3	Triglycerides	0.33	0.47	0.081	1.1	0.22	0.71	0.49	0.31	100	0.601	21
TG 17:0_36:3	Triacylglyceride 17:0_36:3	Triglycerides	2.4	2.6	0.67	6.1	1.6	3.1	1.6	1.4	100	0.34	21
TG 17:0_36:4	Triacylglyceride 17:0_36:4	Triglycerides	1.2	1.2	0.4	2.6	0.8	1.5	0.66	0.56	100	0.226	21
TG 17:1_32:1	Triacylglyceride 17:1_32:1	Triglycerides	0.62	0.71	0.036	2.2	0.45	1.1	0.6	0.53	71	0.050025	21
TG 17:1_34:1	Triacylglyceride 17:1_34:1	Triglycerides	1.4	1.9	0.23	5	0.85	2.7	1.9	1.4	100	0.0569	21
TG 17:1_34:2	Triacylglyceride 17:1_34:2	Triglycerides	1.2	1.4	0.18	3.5	0.8	1.7	0.86	0.91	100	0.014	21
TG 17:1_34:3	Triacylglyceride 17:1_34:3	Triglycerides	0.38	0.43	0.072	0.84	0.3	0.58	0.28	0.23	86	0.019675	21
TG 17:1_36:3	Triacylglyceride 17:1_36:3	Triglycerides	1.1	1.2	0.53	3	0.84	1.5	0.64	0.57	100	0.02356	21
TG 17:1_36:4	Triacylglyceride 17:1_36:4	Triglycerides	0.56	0.58	0.32	1.2	0.43	0.65	0.22	0.21	100	0.093	21
TG 17:1_36:5	Triacylglyceride 17:1_36:5	Triglycerides	0.18	0.21	0.13	0.38	0.15	0.24	0.089	0.081	90	0.05748	21
TG 17:1_38:5	Triacylglyceride 17:1_38:5	Triglycerides	0.0038	0.0048	0.0028	0.0085	0.0031	0.007	0.0039	0.0023	24	0.097	21
TG 17:1_38:6	Triacylglyceride 17:1_38:6	Triglycerides	0.0095	0.03	0.006	0.13	0.0074	0.045	0.037	0.048	29	0.1019	21
TG 17:1_38:7	Triacylglyceride 17:1_38:7	Triglycerides	0.028	0.043	0.02	0.13	0.023	0.055	0.033	0.041	29	0.1239	21
TG 17:2_34:2	Triacylglyceride 17:2_34:2	Triglycerides	0.26	0.28	0.096	0.62	0.18	0.39	0.21	0.13	100	0.0401	21
TG 17:2_34:3	Triacylglyceride 17:2_34:3	Triglycerides	0.19	0.18	0.069	0.38	0.1	0.25	0.15	0.086	90	0.0539	21
TG 17:2_36:2	Triacylglyceride 17:2_36:2	Triglycerides	0.27	0.31	0.12	0.5	0.24	0.44	0.2	0.11	100	0.031795	21
TG 17:2_36:3	Triacylglyceride 17:2_36:3	Triglycerides	0.3	0.33	0.15	0.72	0.22	0.39	0.18	0.15	100	0.1675	21
TG 17:2_36:4	Triacylglyceride 17:2_36:4	Triglycerides	0.34	0.36	0.15	0.69	0.22	0.41	0.19	0.17	100	0.307	21
TG 17:2_38:5	Triacylglyceride 17:2_38:5	Triglycerides	0.16	0.16	0.085	0.28	0.12	0.19	0.077	0.057	95	0.132	21
TG 17:2_38:6	Triacylglyceride 17:2_38:6	Triglycerides	0.25	0.25	0.14	0.42	0.17	0.31	0.14	0.087	95	0.0759	21
TG 17:2_38:7	Triacylglyceride 17:2_38:7	Triglycerides	0.063	0.06	0.034	0.08	0.056	0.065	0.0094	0.012	57	0.07783	21
TG 18:0_30:0	Triacylglyceride 18:0_30:0	Triglycerides	1.5	1.6	0.061	4.2	0.57	1.9	1.3	1.2	52	0.218	21
TG 18:0_30:1	Triacylglyceride 18:0_30:1	Triglycerides	0.89	1.3	0.02	5.8	0.43	1.6	1.2	1.6	62	0.072495	21
TG 18:0_32:0	Triacylglyceride 18:0_32:0	Triglycerides	2.4	3.2	0.16	6.9	1.5	6.1	4.6	2.3	67	0.5	21
TG 18:0_32:1	Triacylglyceride 18:0_32:1	Triglycerides	1.6	2.7	0.098	8.6	0.76	3.8	3	2.5	95	2.56	21
TG 18:0_32:2	Triacylglyceride 18:0_32:2	Triglycerides	0.94	1.3	0.11	5.2	0.45	1.5	1.1	1.2	90	0.271	21
TG 18:0_34:2	Triacylglyceride 18:0_34:2	Triglycerides	5.4	7.4	1.7	19	3.3	11	7.8	4.9	100	0.135	21
TG 18:0_34:3	Triacylglyceride 18:0_34:3	Triglycerides	1.3	1.5	0.45	4.1	0.73	2	1.2	1	100	0.037365	21
TG 18:0_36:1	Triacylglyceride 18:0_36:1	Triglycerides	1	1.3	0.25	2.9	0.39	2.5	2.1	1.1	24	0.07297	21
TG 18:0_36:2	Triacylglyceride 18:0_36:2	Triglycerides	8.6	11	3	22	5.7	17	11	5.9	100	0.095	21
TG 18:0_36:3	Triacylglyceride 18:0_36:3	Triglycerides	12	12	3.1	24	9.6	15	5.5	4.6	100	1.5755	21
TG 18:0_36:4	Triacylglyceride 18:0_36:4	Triglycerides	5.8	6	1.5	11	4.9	7	2.1	2.1	100	0.248	21
TG 18:0_36:5	Triacylglyceride 18:0_36:5	Triglycerides	0.94	0.93	0.37	1.7	0.67	1.1	0.47	0.35	100	0.09108	21
TG 18:0_38:6	Triacylglyceride 18:0_38:6	Triglycerides	1	1	0.54	2.1	0.77	1.2	0.39	0.35	100	0.047	21
TG 18:0_38:7	Triacylglyceride 18:0_38:7	Triglycerides	0.36	0.35	0.17	0.56	0.28	0.42	0.14	0.11	90	0.0905	21
TG 18:1_26:0	Triacylglyceride 18:1_26:0	Triglycerides	1.6	3	0.31	16	0.75	2.5	1.8	4.6	48	0.663	21
TG 18:1_28:1	Triacylglyceride 18:1_28:1	Triglycerides	1.1	2	0.074	13	0.67	1.8	1.1	3.1	71	0.592	21
TG 18:1_30:0	Triacylglyceride 18:1_30:0	Triglycerides	8.3	14	0.69	52	3.2	22	19	13	100	0.402	21
TG 18:1_30:1	Triacylglyceride 18:1_30:1	Triglycerides	5.3	9.3	0.34	33	2.8	13	10	9.7	100	0.2255	21
TG 18:1_30:2	Triacylglyceride 18:1_30:2	Triglycerides	2	3.4	0.31	18	0.96	4.6	3.7	4.1	100	0.06903	21
TG 18:1_31:0	Triacylglyceride 18:1_31:0	Triglycerides	2.8	3	0.21	7.2	1.2	5	3.8	2.3	52	0.181	21
TG 18:1_32:0	Triacylglyceride 18:1_32:0	Triglycerides	40	39	5.3	109	13	56	42	30	100	0.2	21
TG 18:1_32:1	Triacylglyceride 18:1_32:1	Triglycerides	36	45	4.4	143	20	65	45	34	100	0.126	21
TG 18:1_32:2	Triacylglyceride 18:1_32:2	Triglycerides	13	15	3.3	30	7.7	23	16	8.7	100	0.195	21
TG 18:1_32:3	Triacylglyceride 18:1_32:3	Triglycerides	1.6	2	0.75	4.2	1.1	2.9	1.8	1.1	100	0.907	21
TG 18:1_33:0	Triacylglyceride 18:1_33:0	Triglycerides	1.6	2.2	0.15	5.9	0.99	3.1	2.1	1.7	95	0.561	21
TG 18:1_33:1	Triacylglyceride 18:1_33:1	Triglycerides	3.8	5.6	0.77	14	2.6	8.7	6.2	4.2	100	0.1655	21
TG 18:1_33:2	Triacylglyceride 18:1_33:2	Triglycerides	2	2.4	0.69	5.7	1.3	3.6	2.2	1.5	100	0.062285	21
TG 18:1_33:3	Triacylglyceride 18:1_33:3	Triglycerides	0.46	0.5	0.24	1.1	0.35	0.58	0.22	0.22	100	0.1195	21
TG 18:1_34:1	Triacylglyceride 18:1_34:1	Triglycerides	185	216	58	525	113	325	212	126	100	0.05142	21
TG 18:1_34:2	Triacylglyceride 18:1_34:2	Triglycerides	142	157	50	342	101	208	107	78	100	0.849	21
TG 18:1_34:3	Triacylglyceride 18:1_34:3	Triglycerides	23	26	8.9	56	19	35	16	12	100	0.69	21
TG 18:1_34:4	Triacylglyceride 18:1_34:4	Triglycerides	2.5	2.7	1.5	4.9	2	3.2	1.2	0.96	100	0.783	21
TG 18:1_35:2	Triacylglyceride 18:1_35:2	Triglycerides	3.1	3.6	1.2	7.9	2.3	4.7	2.4	1.9	100	15.8	21
TG 18:1_35:3	Triacylglyceride 18:1_35:3	Triglycerides	1.1	1.2	0.61	2.6	0.91	1.4	0.53	0.54	100	0.25	21
TG 18:1_36:0	Triacylglyceride 18:1_36:0	Triglycerides	3.1	3.2	0.76	5.5	1.9	4.5	2.6	1.5	67	0.07562	21
TG 18:1_36:1	Triacylglyceride 18:1_36:1	Triglycerides	21	24	6.6	54	14	39	25	13	100	0.216	21
TG 18:1_36:2	Triacylglyceride 18:1_36:2	Triglycerides	78	82	16	183	48	112	64	42	100	0.06176	21
TG 18:1_36:3	Triacylglyceride 18:1_36:3	Triglycerides	78	81	16	129	54	109	55	31	100	0.05392	21
TG 18:1_36:4	Triacylglyceride 18:1_36:4	Triglycerides	29	32	7.5	51	22	43	21	12	100	0.298	21
TG 18:1_36:5	Triacylglyceride 18:1_36:5	Triglycerides	6.2	6.8	2.8	12	4	9.3	5.3	2.9	100	0.125	21
TG 18:1_36:6	Triacylglyceride 18:1_36:6	Triglycerides	0.82	0.86	0.46	1.5	0.53	1.1	0.61	0.33	100	0.1525	21
TG 18:1_38:5	Triacylglyceride 18:1_38:5	Triglycerides	5	4.9	2.3	9.5	3.6	6.2	2.6	1.8	100	0.129	21
TG 18:1_38:6	Triacylglyceride 18:1_38:6	Triglycerides	3.1	3.2	1.5	5.6	2.2	4	1.8	1.2	100	0.411	21
TG 18:1_38:7	Triacylglyceride 18:1_38:7	Triglycerides	0.97	0.99	0.47	2.1	0.69	1.2	0.53	0.41	90	0.333	21
TG 18:2_28:0	Triacylglyceride 18:2_28:0	Triglycerides	1.1	3.4	0.12	28	0.54	4.6	4	6.3	90	0.229	21
TG 18:2_30:0	Triacylglyceride 18:2_30:0	Triglycerides	4.5	7.6	0.83	26	2.5	12	9	6.9	100	0.128	21
TG 18:2_30:1	Triacylglyceride 18:2_30:1	Triglycerides	2.2	4.9	0.39	22	1.7	7.3	5.5	5.1	100	0.208	21
TG 18:2_31:0	Triacylglyceride 18:2_31:0	Triglycerides	1.2	1.6	0.28	3.9	0.62	2.9	2.2	1.4	24	0.127	21
TG 18:2_32:0	Triacylglyceride 18:2_32:0	Triglycerides	23	24	4.7	64	10	36	26	16	100	0.078005	21
TG 18:2_32:1	Triacylglyceride 18:2_32:1	Triglycerides	21	25	5.5	58	12	36	23	15	100	0.2315	21
TG 18:2_32:2	Triacylglyceride 18:2_32:2	Triglycerides	7.2	8.6	3	18	5.4	11	6.1	4.1	100	0.495	21
TG 18:2_33:0	Triacylglyceride 18:2_33:0	Triglycerides	1.1	1.3	0.24	3.5	0.77	1.6	0.8	0.84	100	0.378	21
TG 18:2_33:1	Triacylglyceride 18:2_33:1	Triglycerides	2.7	3.2	0.89	7.6	1.7	4.6	2.9	1.9	100	0.1215	21
TG 18:2_33:2	Triacylglyceride 18:2_33:2	Triglycerides	1.3	1.6	0.53	3.2	0.98	2.1	1.2	0.76	100	0.057	21
TG 18:2_34:0	Triacylglyceride 18:2_34:0	Triglycerides	15	17	5.8	41	10	22	12	9.1	100	0.114	21
TG 18:2_34:1	Triacylglyceride 18:2_34:1	Triglycerides	119	136	42	284	85	174	89	66	100	0.06609	21
TG 18:2_34:2	Triacylglyceride 18:2_34:2	Triglycerides	81	94	25	181	72	107	34	41	100	0.047425	21
TG 18:2_34:3	Triacylglyceride 18:2_34:3	Triglycerides	14	15	4.1	29	11	17	6.1	6	100	0.566	21
TG 18:2_34:4	Triacylglyceride 18:2_34:4	Triglycerides	1.6	1.6	0.66	2.8	1.2	2.1	0.91	0.58	100	3.72	21
TG 18:2_35:1	Triacylglyceride 18:2_35:1	Triglycerides	2.6	2.7	0.91	6.1	1.7	3.2	1.5	1.4	100	8.23	21
TG 18:2_35:2	Triacylglyceride 18:2_35:2	Triglycerides	2	2.3	0.67	4.5	1.6	2.6	1	1	100	6.29	21
TG 18:2_35:3	Triacylglyceride 18:2_35:3	Triglycerides	0.68	0.74	0.34	1.3	0.55	0.91	0.37	0.25	100	0.2455	21
TG 18:2_36:0	Triacylglyceride 18:2_36:0	Triglycerides	1.7	1.8	1	3.5	1.4	2	0.61	0.63	90	0.052265	21
TG 18:2_36:1	Triacylglyceride 18:2_36:1	Triglycerides	15	15	3.7	26	11	18	6.9	5.3	100	0.039855	21
TG 18:2_36:2	Triacylglyceride 18:2_36:2	Triglycerides	46	47	8.2	69	33	62	29	17	100	0.03866	21
TG 18:2_36:3	Triacylglyceride 18:2_36:3	Triglycerides	37	41	6.3	68	28	56	28	17	100	0.04415	21
TG 18:2_36:4	Triacylglyceride 18:2_36:4	Triglycerides	18	18	3.8	37	11	24	13	8.3	100	0.066435	21
TG 18:2_36:5	Triacylglyceride 18:2_36:5	Triglycerides	4	4.1	1.4	9.7	1.9	5.1	3.2	2.2	100	0.1495	21
TG 18:2_38:4	Triacylglyceride 18:2_38:4	Triglycerides	2.1	2.2	1.1	3.7	1.8	2.5	0.69	0.64	100	0.418	21
TG 18:2_38:5	Triacylglyceride 18:2_38:5	Triglycerides	3.1	3.2	1.7	4.7	2.5	3.7	1.1	0.85	100	0.04214	21
TG 18:2_38:6	Triacylglyceride 18:2_38:6	Triglycerides	1.9	2	0.85	3.3	1.5	2.6	1.1	0.68	100	0.1155	21
TG 18:3_30:0	Triacylglyceride 18:3_30:0	Triglycerides	0.52	0.93	0.086	2.5	0.24	1.4	1.1	0.83	95	0.158	21
TG 18:3_32:0	Triacylglyceride 18:3_32:0	Triglycerides	1.9	2.6	0.58	6.6	1.1	4.1	3	1.9	100	0.1065	21
TG 18:3_32:1	Triacylglyceride 18:3_32:1	Triglycerides	1.8	2.9	0.57	7.4	1.4	4.5	3.1	2	100	0.070245	21
TG 18:3_33:2	Triacylglyceride 18:3_33:2	Triglycerides	0.051	0.076	0.036	0.17	0.04	0.12	0.084	0.056	24	0.123	21
TG 18:3_34:0	Triacylglyceride 18:3_34:0	Triglycerides	1.6	1.9	0.85	4.5	1.2	2.5	1.3	1	100	0.06133	21
TG 18:3_34:1	Triacylglyceride 18:3_34:1	Triglycerides	12	15	6.6	34	9.2	21	12	7.7	100	0.0804964	21
TG 18:3_34:2	Triacylglyceride 18:3_34:2	Triglycerides	8.2	9.9	4.1	21	6.4	13	6.4	4.6	100	0.07724	21
TG 18:3_34:3	Triacylglyceride 18:3_34:3	Triglycerides	1.5	1.7	0.7	3.4	1	2.2	1.2	0.77	100	0.068	21
TG 18:3_35:2	Triacylglyceride 18:3_35:2	Triglycerides	0.29	0.35	0.13	0.78	0.24	0.45	0.21	0.18	100	0.152	21
TG 18:3_36:1	Triacylglyceride 18:3_36:1	Triglycerides	1.8	1.8	0.66	3.2	1.3	2.1	0.78	0.68	100	0.113	21
TG 18:3_36:2	Triacylglyceride 18:3_36:2	Triglycerides	6.5	6.9	1.9	12	4.5	8.9	4.4	2.8	100	0.245	21
TG 18:3_36:3	Triacylglyceride 18:3_36:3	Triglycerides	7	7.1	1.6	14	3.9	9.6	5.7	3.4	100	0.1235	21
TG 18:3_36:4	Triacylglyceride 18:3_36:4	Triglycerides	2.6	2.8	0.85	6.3	1.2	3.5	2.3	1.6	100	0.428	21
TG 18:3_38:5	Triacylglyceride 18:3_38:5	Triglycerides	0.53	0.6	0.21	1.5	0.39	0.74	0.35	0.3	100	0.18	21
TG 18:3_38:6	Triacylglyceride 18:3_38:6	Triglycerides	0.38	0.44	0.13	1.1	0.29	0.62	0.33	0.24	100	0.1135	21
TG 20:0_32:3	Triacylglyceride 20:0_32:3	Triglycerides	0.39	0.43	0.19	0.85	0.27	0.56	0.29	0.19	100	0.039	21
TG 20:0_32:4	Triacylglyceride 20:0_32:4	Triglycerides	0.38	0.43	0.19	0.79	0.3	0.54	0.24	0.18	100	0.04003	21
TG 20:0_34:1	Triacylglyceride 20:0_34:1	Triglycerides	0.58	0.68	0.2	1.4	0.48	0.92	0.44	0.31	90	0.07104	21
TG 20:1_24:3	Triacylglyceride 20:1_24:3	Triglycerides									0	0.102	21
TG 20:1_26:1	Triacylglyceride 20:1_26:1	Triglycerides	0.0013	0.0013	0.0009	0.0015	0.001	0.0015	0.0005	0.0002	19	0.099	21
TG 20:1_30:1	Triacylglyceride 20:1_30:1	Triglycerides	0.22	0.22	0.037	0.42	0.1	0.29	0.19	0.13	57	0.1145	21
TG 20:1_31:0	Triacylglyceride 20:1_31:0	Triglycerides									0	0.099165	16
TG 20:1_32:0	Triacylglyceride 20:1_32:0	Triglycerides	0.18	0.15	0.088	0.19	0.088			0.055	60	0.33	5
TG 20:1_32:1	Triacylglyceride 20:1_32:1	Triglycerides	0.53	0.55	0.26	1.1	0.33	0.64	0.31	0.25	67	0.116	21
TG 20:1_32:2	Triacylglyceride 20:1_32:2	Triglycerides	0.3	0.33	0.13	0.61	0.22	0.42	0.19	0.15	100	0.145	21
TG 20:1_32:3	Triacylglyceride 20:1_32:3	Triglycerides	0.21	0.21	0.1	0.35	0.16	0.26	0.1	0.068	95	0.0827	21
TG 20:1_34:0	Triacylglyceride 20:1_34:0	Triglycerides	0.32	0.27	0.055	0.42	0.12	0.39	0.27	0.14	48	0.05495	21
TG 20:1_34:1	Triacylglyceride 20:1_34:1	Triglycerides	1.2	1.4	0.45	2.9	0.7	2	1.3	0.77	100	0.041	21
TG 20:1_34:2	Triacylglyceride 20:1_34:2	Triglycerides	0.86	1.1	0.43	2	0.63	1.5	0.84	0.53	100	0.106	21
TG 20:1_34:3	Triacylglyceride 20:1_34:3	Triglycerides	0.27	0.29	0.16	0.57	0.23	0.34	0.11	0.11	86	0.01616	21
TG 20:2_32:0	Triacylglyceride 20:2_32:0	Triglycerides	0.64	0.66	0.23	1.1	0.4	0.93	0.53	0.29	67	0.0419	21
TG 20:2_32:1	Triacylglyceride 20:2_32:1	Triglycerides	0.52	0.62	0.1	1.7	0.28	0.95	0.67	0.42	100	0.0726	21
TG 20:2_34:1	Triacylglyceride 20:2_34:1	Triglycerides	1.7	1.9	0.38	3.7	0.93	2.9	2	1.1	100	0.097	21
TG 20:2_34:2	Triacylglyceride 20:2_34:2	Triglycerides	1.5	1.5	0.41	2.6	0.89	2	1.1	0.68	100	0.0646	21
TG 20:2_34:3	Triacylglyceride 20:2_34:3	Triglycerides	0.34	0.35	0.18	0.68	0.22	0.46	0.24	0.14	100	0.0597	21
TG 20:2_34:4	Triacylglyceride 20:2_34:4	Triglycerides	0.06	0.054	0.03	0.081	0.037	0.067	0.03	0.017	57	0.069705	21
TG 20:2_36:5	Triacylglyceride 20:2_36:5	Triglycerides	0.11	0.11	0.052	0.22	0.086	0.12	0.039	0.041	71	0.045	21
TG 20:3_32:0	Triacylglyceride 20:3_32:0	Triglycerides	0.83	0.83	0.059	1.9	0.24	1.3	1.1	0.61	95	0.109	21
TG 20:3_32:1	Triacylglyceride 20:3_32:1	Triglycerides	0.7	0.82	0.097	2.1	0.36	1.2	0.87	0.58	100	0.032735	21
TG 20:3_32:2	Triacylglyceride 20:3_32:2	Triglycerides	0.41	0.46	0.071	1.2	0.24	0.69	0.44	0.29	90	0.207	21
TG 20:3_34:0	Triacylglyceride 20:3_34:0	Triglycerides	0.48	0.51	0.06	1	0.27	0.77	0.5	0.3	95	0.0939	21
TG 20:3_34:1	Triacylglyceride 20:3_34:1	Triglycerides	3.6	3.5	0.49	7.8	1.7	5	3.3	2	100	0.053755	21
TG 20:3_34:2	Triacylglyceride 20:3_34:2	Triglycerides	2.5	2.6	0.57	5.6	1.4	3.3	1.9	1.3	100	0.116	21
TG 20:3_34:3	Triacylglyceride 20:3_34:3	Triglycerides	0.56	0.57	0.18	1.1	0.34	0.77	0.43	0.25	100	0.062815	21
TG 20:3_36:3	Triacylglyceride 20:3_36:3	Triglycerides	1.4	1.5	0.62	3.6	1.1	1.7	0.58	0.64	100	0.0976	21
TG 20:3_36:4	Triacylglyceride 20:3_36:4	Triglycerides	0.7	0.77	0.47	1.8	0.55	0.93	0.38	0.31	100	0.0292	21
TG 20:3_36:5	Triacylglyceride 20:3_36:5	Triglycerides	0.33	0.34	0.2	0.79	0.25	0.39	0.13	0.13	100	0.209	21
TG 20:4_30:0	Triacylglyceride 20:4_30:0	Triglycerides	0.83	1.1	0.028	4.6	0.5	1.4	0.87	1.1	76	0.0695	21
TG 20:4_32:0	Triacylglyceride 20:4_32:0	Triglycerides	2.1	2.3	0.12	6.1	0.65	3	2.4	1.7	100	0.052835	21
TG 20:4_32:1	Triacylglyceride 20:4_32:1	Triglycerides	1.9	2.2	0.18	7.7	0.74	3	2.3	1.8	100	0.317	21
TG 20:4_32:2	Triacylglyceride 20:4_32:2	Triglycerides	0.79	0.86	0.14	3.2	0.36	1.1	0.75	0.69	100	0.02652	21
TG 20:4_33:2	Triacylglyceride 20:4_33:2	Triglycerides	0.23	0.25	0.081	0.45	0.15	0.36	0.22	0.12	100	2.4	21
TG 20:4_34:0	Triacylglyceride 20:4_34:0	Triglycerides	1.5	1.5	0.21	2.8	0.72	2.1	1.3	0.82	100	1.829	21
TG 20:4_34:1	Triacylglyceride 20:4_34:1	Triglycerides	11	10	1.6	18	5.3	15	9.5	5.1	100	0.638	21
TG 20:4_34:2	Triacylglyceride 20:4_34:2	Triglycerides	7.2	8	1.6	15	5	11	5.9	3.6	100	0.1358	21
TG 20:4_34:3	Triacylglyceride 20:4_34:3	Triglycerides	1.5	1.4	0.32	2.9	0.89	1.9	1	0.67	100	0.0528	21
TG 20:4_35:3	Triacylglyceride 20:4_35:3	Triglycerides	0.089	0.088	0.012	0.17	0.064	0.12	0.054	0.041	62	0.064385	21
TG 20:4_36:2	Triacylglyceride 20:4_36:2	Triglycerides	6.5	6.8	2.8	11	4.6	8.3	3.7	2.3	100	0.08757	21
TG 20:4_36:3	Triacylglyceride 20:4_36:3	Triglycerides	6.2	5.9	2.9	10	4	6.9	2.9	1.9	100	0.151	21
TG 20:4_36:4	Triacylglyceride 20:4_36:4	Triglycerides	2.9	2.8	1.4	5.1	1.9	3.6	1.7	1.1	100	0.179	21
TG 20:4_36:5	Triacylglyceride 20:4_36:5	Triglycerides	0.85	0.84	0.23	1.9	0.41	1.1	0.73	0.48	100	0.124	21
TG 20:5_34:0	Triacylglyceride 20:5_34:0	Triglycerides	0.31	0.45	0.095	1.6	0.21	0.58	0.37	0.4	95	0.117	21
TG 20:5_34:1	Triacylglyceride 20:5_34:1	Triglycerides	1.8	2.5	0.4	9.6	1.1	3.3	2.1	2.2	100	0.167	21
TG 20:5_34:2	Triacylglyceride 20:5_34:2	Triglycerides	1.4	1.9	0.43	5.9	0.99	2.6	1.6	1.4	100	0.02262	21
TG 20:5_36:2	Triacylglyceride 20:5_36:2	Triglycerides	1.6	1.6	0.54	4.3	0.85	2	1.2	0.96	95	0.018395	21
TG 20:5_36:3	Triacylglyceride 20:5_36:3	Triglycerides	1.5	1.7	0.48	3.5	0.88	2.1	1.3	0.88	95	0.0503929	21
TG 22:0_32:4	Triacylglyceride 22:0_32:4	Triglycerides	0.022	0.023	0.015	0.035	0.016	0.03	0.014	0.0078	24	0.01739	21
TG 22:1_32:5	Triacylglyceride 22:1_32:5	Triglycerides	0.023	0.025	0.014	0.037	0.016	0.034	0.018	0.0094	24	0.1105	21
TG 22:2_32:4	Triacylglyceride 22:2_32:4	Triglycerides	0.015	0.023	0.013	0.039	0.014	0.036	0.022	0.012	24	0.0876	21
TG 22:3_30:2	Triacylglyceride 22:3_30:2	Triglycerides									0	0.791	21
TG 22:4_32:0	Triacylglyceride 22:4_32:0	Triglycerides	0.24	0.34	0.052	0.79	0.17	0.52	0.35	0.23	81	0.775	21
TG 22:4_32:2	Triacylglyceride 22:4_32:2	Triglycerides	0.16	0.19	0.094	0.43	0.12	0.24	0.12	0.095	62	0.168	21
TG 22:4_34:2	Triacylglyceride 22:4_34:2	Triglycerides	0.79	0.87	0.13	1.8	0.58	1.2	0.66	0.45	100	0.071	21
TG 22:5_32:0	Triacylglyceride 22:5_32:0	Triglycerides	0.7	0.73	0.082	1.5	0.36	1.1	0.71	0.41	86	0.099	21
TG 22:5_32:1	Triacylglyceride 22:5_32:1	Triglycerides	0.53	0.66	0.088	1.4	0.25	1.1	0.81	0.44	100	0.08105	21
TG 22:5_34:1	Triacylglyceride 22:5_34:1	Triglycerides	3.5	3.2	0.87	7.7	2.1	3.9	1.8	1.7	100	0.072975	21
TG 22:5_34:2	Triacylglyceride 22:5_34:2	Triglycerides	2.4	2.7	1.2	5.4	1.9	3.1	1.1	1.2	100	0.126	21
TG 22:5_34:3	Triacylglyceride 22:5_34:3	Triglycerides	0.54	0.56	0.29	0.97	0.39	0.73	0.34	0.2	100	0.03057	21
TG 22:6_32:0	Triacylglyceride 22:6_32:0	Triglycerides	0.94	1.4	0.17	4.8	0.55	2	1.4	1.2	95	0.025	21
TG 22:6_32:1	Triacylglyceride 22:6_32:1	Triglycerides	1	1.5	0.13	6.5	0.52	1.8	1.3	1.4	100	0.0639	21
TG 22:6_34:1	Triacylglyceride 22:6_34:1	Triglycerides	5	6.3	1.3	17	3	8.3	5.3	4.4	100	0.023	21
TG 22:6_34:2	Triacylglyceride 22:6_34:2	Triglycerides	4.7	5.2	1.2	14	2.6	7.2	4.5	3.4	100	0.061	21
TG 22:6_34:3	Triacylglyceride 22:6_34:3	Triglycerides	0.91	1.2	0.32	3.2	0.67	1.9	1.3	0.75	100	0.158	21
Hex3Cer d18:1/16:0	Trihexosylceramide d18:1/16:0	Trihexosylceramides	1.5	1.5	0.97	2.2	1.3	1.8	0.45	0.29	100	0.26	21
Hex3Cer d18:1/18:0	Trihexosylceramide d18:1/18:0	Trihexosylceramides	0.16	0.16	0.092	0.27	0.12	0.19	0.069	0.048	100	0.022	21
Hex3Cer d18:1/20:0	Trihexosylceramide d18:1/20:0	Trihexosylceramides	0.065	0.068	0.052	0.092	0.057	0.081	0.024	0.015	24	0.023	21
Hex3Cer d18:1/22:0	Trihexosylceramide d18:1/22:0	Trihexosylceramides	0.18	0.18	0.089	0.27	0.15	0.2	0.049	0.041	100	0.022	21
Hex3Cer d18:1/24:1	Trihexosylceramide d18:1/24:1	Trihexosylceramides	0.62	0.65	0.41	0.92	0.51	0.76	0.25	0.15	100	0.022	21
Hex3Cer d18:1/26:1	Trihexosylceramide d18:1/26:1	Trihexosylceramides	0.054	0.052	0.021	0.071	0.043	0.068	0.025	0.015	90	0.017	21
Choline	Choline	Vitamins and Cofactors	13	13	10	20	11	15	3.8	2.4	100	0.26	21
Disclaimer:
The reference ranges do not represent a diagnosis but serve as a means of comparison only. A reference range provides no statement about whether a person is sick or healthy.
Individuals with metabolite concentrations outside the range can therefore be healthy and individuals with metabolite concentrations in the reference range can be ill.

## Sheet: Black-female-50s
Quantitative metabolomics database (QMDB)
Selected matrix:	human plasma
Assay:	MxP® Quant 500
Age:	50 to 59
Gender:	f
Ethnicity:	Black or African American
Samples found matching the preferences	30
Short Name	Metabolite	Class	Median [µM]	Mean [µM]	Min [µM]	Max [µM]	1st quartile [µM]	3rd quartile [µM]	Interquartal range [µM]	Standard deviation	% of samples > LOD	Typical LOD [µM]	No of samples
C0	Carnitine	Acylcarnitines	42	42	20	72	33	51	17	11	100	1.5065	30
C2	Acetylcarnitine	Acylcarnitines	4.8	5.2	3	11	3.6	5.8	2.1	1.8	100	0.060515	30
C3	Propionylcarnitine	Acylcarnitines	0.35	0.38	0.15	0.83	0.26	0.47	0.21	0.17	97	0.098	30
C3-DC (C4-OH)	Malonylcarnitine (Hydroxybutyrylcarnitine)	Acylcarnitines	0.092	0.092	0.046	0.16	0.053	0.11	0.06	0.038	37	0.057	30
C3-OH	Hydroxypropionylcarnitine	Acylcarnitines									0	0.363	30
C3:1	Propenoylcarnitine	Acylcarnitines	0.021	0.021	0.011	0.032				0.014	6.7	0.0362	30
C4	Butyrylcarnitine	Acylcarnitines	0.17	0.18	0.076	0.42	0.14	0.22	0.078	0.082	90	0.0604	30
C4:1	Butenylcarnitine	Acylcarnitines									0	0.054	30
C5	Valerylcarnitine	Acylcarnitines	0.12	0.13	0.056	0.31	0.09	0.14	0.055	0.055	90	0.0504	30
C5-DC (C6-OH)	Glutarylcarnitine (Hydroxyhexanoylcarnitine)	Acylcarnitines									0	0.09628	30
C5-M-DC	Methylglutarylcarnitine	Acylcarnitines									0	0.06872	30
C5-OH (C3-DC-M)	Hydroxyvalerylcarnitine (Methylmalonylcarnitine)	Acylcarnitines	0.059	0.059	0.035	0.077	0.048	0.071	0.023	0.014	23	0.1	30
C5:1	Tiglylcarnitine	Acylcarnitines			0.033	0.033					3.3	0.04377	30
C5:1-DC	Glutaconylcarnitine	Acylcarnitines			0.024	0.024					3.3	0.0423541	30
C6 (C4:1-DC)	Hexanoylcarnitine (Fumarylcarnitine)	Acylcarnitines	0.06	0.064	0.031	0.11	0.041	0.084	0.042	0.028	23	0.153	30
C6:1	Hexenoylcarnitine	Acylcarnitines			0.041	0.041					3.3	0.09068	30
C7-DC	Pimelylcarnitine	Acylcarnitines	0.04	0.04	0.034	0.046	0.035	0.045	0.0099	0.0051	13	0.060255	30
C8	Octanoylcarnitine	Acylcarnitines	0.21	0.21	0.063	0.42	0.092	0.34	0.25	0.13	37	0.223	30
C9	Nonanoylcarnitine	Acylcarnitines	0.055	0.055	0.047	0.066	0.048	0.06	0.013	0.0073	20	0.028	30
C10	Decanoylcarnitine	Acylcarnitines	0.25	0.29	0.11	0.69	0.22	0.35	0.13	0.12	80	0.1295	30
C10:1	Decenoylcarnitine	Acylcarnitines									0	0.4035	30
C10:2	Decadienoylcarnitine	Acylcarnitines	0.056	0.056	0.04	0.084	0.043	0.064	0.021	0.015	20	0.1085	30
C12	Dodecanoylcarnitine	Acylcarnitines	0.083	0.096	0.04	0.2	0.052	0.11	0.062	0.054	23	0.072	30
C12-DC	Dodecanedioylcarnitine	Acylcarnitines									0	1.019	30
C12:1	Dodecenoylcarnitine	Acylcarnitines									0	0.109	30
C14	Tetradecanoylcarnitine	Acylcarnitines	0.032	0.032	0.032	0.033				0.0005	6.7	0.0599	30
C14:1	Tetradecenoylcarnitine	Acylcarnitines	0.057	0.068	0.046	0.15	0.052	0.084	0.032	0.025	67	0.0349	30
C14:1-OH	Hydroxytetradecenoylcarnitine	Acylcarnitines	0.028	0.029	0.02	0.038	0.023	0.036	0.013	0.0066	20	0.035385	30
C14:2	Tetradecadienoylcarnitine	Acylcarnitines	0.055	0.063	0.032	0.095	0.041	0.094	0.053	0.027	23	0.0322	30
C14:2-OH	Hydroxytetradecadienoylcarnitine	Acylcarnitines	0.016	0.015	0.012	0.019	0.013	0.018	0.0053	0.0029	13	0.031	30
C16	Hexadecanoylcarnitine	Acylcarnitines	0.1	0.11	0.056	0.16	0.081	0.14	0.06	0.035	27	0.088	30
C16-OH	Hydroxyhexadecanoylcarnitine	Acylcarnitines									0	0.077	30
C16:1	Hexadecenoylcarnitine	Acylcarnitines	0.048	0.053	0.039	0.069	0.042	0.068	0.026	0.013	20	0.05	30
C16:1-OH	Hydroxyhexadecenoylcarnitine	Acylcarnitines									0	0.039895	30
C16:2	Hexadecadienoylcarnitine	Acylcarnitines	0.014	0.016	0.013	0.02	0.013			0.0035	10	0.02942	30
C16:2-OH	Hydroxyhexadecadienoylcarnitine	Acylcarnitines			0.011	0.011					3.3	0.041045	30
C18	Octadecanoylcarnitine	Acylcarnitines	0.05	0.05	0.024	0.079	0.032	0.07	0.038	0.02	30	0.02201	30
C18:1	Octadecenoylcarnitine	Acylcarnitines	0.17	0.18	0.12	0.22	0.16	0.19	0.034	0.027	53	0.082855	30
C18:1-OH	Hydroxyoctadecenoylcarnitine	Acylcarnitines									0	0.0687	30
C18:2	Octadecadienoylcarnitine	Acylcarnitines	0.095	0.098	0.035	0.16	0.076	0.13	0.051	0.034	93	0.0347	30
Trigonelline	Trigonelline	Alkaloids	0.25	0.32	0.058	1.1	0.12	0.47	0.35	0.27	90	0.042595	30
TMAO	Trimethylamine N-oxide	Amine Oxides	4	5.6	1.4	40	2.4	6.2	3.8	6.9	100	0.108	30
1-Met-His	1-Methylhistidine	Amino Acid Related	5.9	6.2	2.3	13	4.4	7.6	3.2	2.4	100	0.01	30
3-Met-His	3-Methylhistidine	Amino Acid Related	11	13	0.47	38	3.7	20	16	10	100	0.01	30
5-AVA	5-Aminovaleric acid	Amino Acid Related	0.052	0.05	0.02	0.069	0.043	0.059	0.016	0.012	53	0.04	30
AABA	alpha-Aminobutyric acid	Amino Acid Related	16	19	8.9	31	14	25	11	5.8	100	0.435	30
Ac-Orn	Acetylornithine	Amino Acid Related									0	0.065	30
ADMA	Asymmetric dimethylarginine	Amino Acid Related	0.53	0.54	0.38	0.73	0.46	0.59	0.13	0.085	100	0.08	30
alpha-AAA	alpha-Aminoadipic acid	Amino Acid Related	0.87	0.89	0.33	1.8	0.73	1.1	0.35	0.34	100	0.3	30
Anserine	L-Anserine	Amino Acid Related	0.02	0.02	0.012	0.026	0.014	0.025	0.012	0.006	13	0.01	30
BABA	beta-Aminobutyric acid	Amino Acid Related	0.045	0.054	0.025	0.1	0.028	0.09	0.062	0.034	13	0.03	30
Betaine	Betaine	Amino Acid Related	27	28	13	43	23	35	12	7.8	100	0.2	30
c4-OH-Pro	cis-4-Hydroxyproline	Amino Acid Related			0.046	0.046					3.3	0.3	30
Carnosine	Carnosine	Amino Acid Related									0	0.2	30
Cit	Citrulline	Amino Acid Related	37	39	24	61	32	45	13	9.6	100	1	30
Creatinine	Creatinine	Amino Acid Related	80	81	59	116	66	88	21	16	100	3.85	30
Cystine	Cystine	Amino Acid Related	43	45	4.8	88	30	60	29	18	100	0.07489	30
DOPA	Dihydroxyphenylalanine	Amino Acid Related	0.042	0.043	0.037	0.049	0.04	0.048	0.0082	0.0045	20	0.148	30
HArg	Homoarginine	Amino Acid Related	3.5	3.7	1.9	8	2.6	4.2	1.6	1.5	100	0.01	30
HCys	Homocysteine	Amino Acid Related	5.8	6	3.4	9.9	4.3	7.1	2.8	1.8	100	0.266	30
Kynurenine	Kynurenine	Amino Acid Related	2	2.1	1.2	3.5	1.7	2.3	0.62	0.54	100	0.2265	30
Met-SO	Methionine-Sulfoxide	Amino Acid Related	0.61	0.66	0.32	1.5	0.51	0.76	0.25	0.23	100	0.1	30
Nitro-Tyr	Nitrotyrosine	Amino Acid Related									0	0.3	30
Orn	Ornithine	Amino Acid Related	112	111	49	173	92	129	38	29	100	1	30
PAG	Phenylacetylglycine	Amino Acid Related									0	0.01	30
PheAlaBetaine	Phenylalanine betaine	Amino Acid Related									0	0.01	30
ProBetaine	Proline betaine	Amino Acid Related	4.6	5.2	0.32	23	1.1	6.7	5.6	5.1	100	0.061	30
Sarcosine	Sarcosine	Amino Acid Related	3.9	4.1	2.4	7.1	3.3	4.7	1.3	1	100	0.1855	30
SDMA	Symmetric dimethylarginine	Amino Acid Related	0.53	0.54	0.4	0.77	0.48	0.58	0.1	0.096	100	0.02	30
t4-OH-Pro	trans-4-Hydroxyproline	Amino Acid Related	15	16	6.4	29	11	20	9.5	6.2	100	0.382	30
Taurine	Taurine	Amino Acid Related	65	72	34	143	50	86	36	27	100	0.363	30
TrpBetaine	Tryptophan betaine	Amino Acid Related	0.35	0.67	0.025	4	0.14	0.99	0.86	0.87	100	0.00811	30
Ala	Alanine	Amino Acids	438	438	286	727	358	497	139	93	100	2.4075	30
Arg	Arginine	Amino Acids	72	75	31	142	63	89	26	23	100	0.987	30
Asn	Asparagine	Amino Acids	59	58	37	87	47	66	20	12	100	0.5225	30
Asp	Aspartic Acid	Amino Acids	7.3	7.5	3.2	13	5.9	9.2	3.3	2.5	100	1.0305	30
Cys	Cysteine	Amino Acids	69	70	46	115	64	75	12	15	100	0.1	30
Gln	Glutamine	Amino Acids	665	682	509	1017	623	755	132	103	100	3.45	30
Glu	Glutamic Acid	Amino Acids	68	65	24	128	43	77	33	26	100	2.662	30
Gly	Glycine	Amino Acids	280	341	201	704	253	402	150	126	100	4.7	30
His	Histidine	Amino Acids	91	91	65	125	82	98	15	14	100	1.1	30
Ile	Isoleucine	Amino Acids	78	82	51	131	69	93	24	19	100	0.759	30
Leu	Leucine	Amino Acids	137	141	96	231	124	155	31	29	100	1.095	30
Lys	Lysine	Amino Acids	198	199	121	275	183	212	30	32	100	1.4	30
Met	Methionine	Amino Acids	30	30	21	44	26	34	7.9	5.5	100	0.8055	30
Phe	Phenylalanine	Amino Acids	63	65	48	87	58	72	14	9.6	100	0.8685	30
Pro	Proline	Amino Acids	200	205	110	370	157	244	87	64	100	2.07	30
Ser	Serine	Amino Acids	112	116	77	161	92	143	52	25	100	1.55	30
Thr	Threonine	Amino Acids	153	166	107	260	130	202	73	45	100	0.9225	30
Trp	Tryptophan	Amino Acids	64	63	39	83	57	68	11	10	100	0.792	30
Tyr	Tyrosine	Amino Acids	83	81	47	116	65	92	26	17	100	0.4925	30
Val	Valine	Amino Acids	232	239	151	397	214	264	50	49	100	1.048	30
CA	Cholic Acid	Bile Acids	0.041	0.21	0.011	1.9	0.022	0.26	0.24	0.4	93	0.003	30
CDCA	Chenodeoxycholic acid	Bile Acids	0.16	0.31	0.0091	1.6	0.07	0.36	0.29	0.41	63	0.02	30
DCA	Deoxycholic acid	Bile Acids	0.3	0.45	0.063	1.6	0.22	0.5	0.28	0.41	93	0.0081	30
GCA	Glycocholic acid	Bile Acids	0.19	0.33	0.023	2.7	0.1	0.41	0.31	0.49	100	0.00429	30
GCDCA	Glycochenodeoxycholic acid	Bile Acids	0.32	0.6	0.091	3.1	0.22	0.85	0.63	0.69	100	0.002	30
GDCA	Glycodeoxycholic acid	Bile Acids	0.27	0.43	0.0026	3	0.16	0.46	0.3	0.59	97	0.0016736	30
GLCA	Glycolithocholic acid	Bile Acids	0.011	0.013	0.0046	0.032	0.0064	0.019	0.012	0.0078	73	0.003565	30
GLCAS	Glycolithocholic acid sulfate	Bile Acids	0.25	0.31	0.0044	0.92	0.16	0.48	0.32	0.22	100	0.0034	30
GUDCA	Glycoursodeoxycholic acid	Bile Acids	0.056	0.11	0.01	0.4	0.035	0.12	0.088	0.11	93	0.0019	30
TCA	Taurocholic acid	Bile Acids	0.043	0.075	0.0098	0.62	0.02	0.083	0.062	0.12	83	0.005	30
TCDCA	Taurochenodeoxycholic acid	Bile Acids	0.059	0.13	0.016	1	0.036	0.15	0.11	0.2	97	0.004085	30
TDCA	Taurodeoxycholic acid	Bile Acids	0.068	0.097	0.011	0.85	0.034	0.088	0.053	0.16	90	0.004	30
TLCA	Taurolithocholic acid	Bile Acids	0.0026	0.0039	0.0013	0.013	0.002	0.0031	0.001	0.0035	37	0.002	30
TMCA	Tauro-muricholic acids	Bile Acids	0.018	0.024	0.004	0.058	0.01	0.035	0.025	0.016	77	0.002	30
beta-Ala	beta-Alanine	Biogenic Amines	2.7	3.1	1.8	6.7	2.2	3.4	1.2	1.2	100	0.11	30
Dopamine	Dopamine	Biogenic Amines									0	0.2315	30
GABA	gamma-Aminobutyric acid	Biogenic Amines	0.19	0.19	0.13	0.29	0.15	0.21	0.052	0.041	100	0.04652	30
Histamine	Histamine	Biogenic Amines									0	0.429	30
PEA	Phenylethylamine	Biogenic Amines									0	0.001	30
Putrescine	Putrescine	Biogenic Amines	0.13	0.14	0.081	0.29	0.097	0.18	0.081	0.052	87	0.0624	30
Serotonin	Serotonin	Biogenic Amines	0.12	0.32	0.042	1.2	0.074	0.42	0.35	0.38	73	0.04	30
Spermidine	Spermidine	Biogenic Amines	0.27	0.24	0.11	0.29	0.15	0.29	0.14	0.085	13	0.2	30
Spermine	Spermine	Biogenic Amines	0.21	0.21	0.18	0.24	0.18	0.23	0.051	0.028	20	0.2	30
Hexose	Hexose	Carbohydrates and Related	4485	4645	3607	6204	4134	5039	905	646	100	88.1885	30
AconAcid	Aconitic acid	Carboxylic Acids	11	12	6.1	30	9	14	4.7	4.6	100	0.2667	30
DiCA(12:0)	Dodecanedioic acid	Carboxylic Acids									0	0.1595	30
DiCA(14:0)	Tetradecanedioic acid	Carboxylic Acids									0	0.09969	30
HipAcid	Hippuric acid	Carboxylic Acids	4.4	6.2	0.72	19	2.2	8.7	6.5	5.2	100	0.5	30
Lac	Lactic acid	Carboxylic Acids	4474	4538	2248	10060	3265	5295	2030	1595	100	143.401	30
OH-GlutAcid	Hydroxyglutaric acid	Carboxylic Acids									0	6.942	30
Suc	Succinic acid	Carboxylic Acids									0	20.851	30
Cer d16:1/18:0	Ceramide d16:1/18:0	Ceramides	0.091	0.09	0.054	0.13	0.07	0.1	0.034	0.021	57	0.025875	30
Cer d16:1/20:0	Ceramide d16:1/20:0	Ceramides	0.097	0.096	0.017	0.15	0.076	0.12	0.047	0.031	100	0.01891	30
Cer d16:1/22:0	Ceramide d16:1/22:0	Ceramides	0.33	0.36	0.16	0.79	0.25	0.46	0.21	0.14	100	0.0694	30
Cer d16:1/23:0	Ceramide d16:1/23:0	Ceramides	0.16	0.15	0.056	0.25	0.11	0.19	0.083	0.05	100	0.033	30
Cer d16:1/24:0	Ceramide d16:1/24:0	Ceramides	0.25	0.25	0.089	0.41	0.17	0.31	0.14	0.092	100	0.01336	30
Cer d18:1/14:0	Ceramide d18:1/14:0	Ceramides	0.085	0.089	0.062	0.17	0.076	0.096	0.02	0.021	67	0.04241	30
Cer d18:1/16:0	Ceramide d18:1/16:0	Ceramides	0.51	0.52	0.33	0.81	0.43	0.6	0.17	0.12	100	0.011415	30
Cer d18:1/18:0	Ceramide d18:1/18:0	Ceramides	0.18	0.2	0.12	0.37	0.16	0.24	0.079	0.054	100	0.00978	30
Cer d18:1/18:0-OH	Ceramide d18:1/18:0-OH	Ceramides	0.32	0.32	0.3	0.34				0.031	6.7	0.2945	30
Cer d18:1/18:1	Ceramide d18:1/18:1	Ceramides	0.038	0.036	0.022	0.046	0.03	0.04	0.01	0.0073	30	0.0271351	30
Cer d18:1/20:0	Ceramide d18:1/20:0	Ceramides	0.14	0.15	0.083	0.23	0.13	0.17	0.038	0.034	100	0.007175	30
Cer d18:1/20:0-OH	Ceramide d18:1/20:0-OH	Ceramides	0.39	0.5	0.21	0.84	0.32	0.68	0.35	0.21	47	0.239	30
Cer d18:1/22:0	Ceramide d18:1/22:0	Ceramides	0.94	0.99	0.62	1.7	0.78	1.2	0.42	0.27	100	0.010545	30
Cer d18:1/23:0	Ceramide d18:1/23:0	Ceramides	1	1.1	0.65	1.6	0.92	1.3	0.42	0.27	100	0.012515	30
Cer d18:1/24:0	Ceramide d18:1/24:0	Ceramides	2.8	2.9	1.6	5.2	2.4	3.4	1.1	0.8	100	0.02399	30
Cer d18:1/24:1	Ceramide d18:1/24:1	Ceramides	1.1	1.1	0.73	1.8	0.99	1.3	0.27	0.23	100	0.011975	30
Cer d18:1/25:0	Ceramide d18:1/25:0	Ceramides	0.5	0.5	0.3	0.73	0.4	0.58	0.18	0.12	100	0.066815	30
Cer d18:1/26:0	Ceramide d18:1/26:0	Ceramides	0.1	0.11	0.067	0.17	0.086	0.14	0.056	0.032	97	0.024	30
Cer d18:1/26:1	Ceramide d18:1/26:1	Ceramides	0.028	0.031	0.017	0.062	0.023	0.037	0.014	0.011	97	0.0119	30
Cer d18:2/14:0	Ceramide d18:2/14:0	Ceramides	0.012	0.014	0.011	0.018	0.011			0.0036	10	0.01116	30
Cer d18:2/16:0	Ceramide d18:2/16:0	Ceramides	0.13	0.13	0.052	0.2	0.11	0.14	0.036	0.034	100	0.049	30
Cer d18:2/18:0	Ceramide d18:2/18:0	Ceramides	0.099	0.1	0.065	0.18	0.08	0.12	0.037	0.028	97	0.029	30
Cer d18:2/18:1	Ceramide d18:2/18:1	Ceramides	0.02	0.02	0.018	0.022	0.019	0.022	0.0027	0.0015	23	0.01462	30
Cer d18:2/20:0	Ceramide d18:2/20:0	Ceramides	0.078	0.082	0.037	0.14	0.07	0.088	0.018	0.022	100	0.025	30
Cer d18:2/22:0	Ceramide d18:2/22:0	Ceramides	0.33	0.34	0.19	0.78	0.27	0.37	0.1	0.11	100	0.011245	30
Cer d18:2/23:0	Ceramide d18:2/23:0	Ceramides	0.15	0.16	0.088	0.29	0.11	0.19	0.08	0.051	100	0.041	30
Cer d18:2/24:0	Ceramide d18:2/24:0	Ceramides	0.62	0.65	0.36	1.7	0.52	0.69	0.17	0.25	100	0.00689	30
Cer d18:2/24:1	Ceramide d18:2/24:1	Ceramides	0.24	0.25	0.17	0.34	0.2	0.29	0.092	0.051	100	0.005	30
CE 14:0	Cholesteryl ester 14:0	Cholesteryl Esters	14	14	5.8	29	9.4	17	7.4	5.2	100	0.3075	30
CE 14:1	Cholesteryl ester 14:1	Cholesteryl Esters	0.082	0.13	0.052	0.3	0.065	0.19	0.12	0.083	30	0.144	30
CE 15:0	Cholesteryl ester 15:0	Cholesteryl Esters	5.3	5.2	2.4	8.8	3.9	6.1	2.2	1.6	100	1.39	30
CE 15:1	Cholesteryl ester 15:1	Cholesteryl Esters	0.79	0.83	0.57	1.3	0.61	1.2	0.57	0.28	23	0.507	30
CE 16:0	Cholesteryl ester 16:0	Cholesteryl Esters	187	195	133	280	164	219	55	38	100	0.938	30
CE 16:1	Cholesteryl ester 16:1	Cholesteryl Esters	34	36	16	68	28	45	16	12	100	9.92	30
CE 17:0	Cholesteryl ester 17:0	Cholesteryl Esters	4.7	4.7	1.7	8.3	3.9	5.5	1.5	1.5	97	1.25	30
CE 17:1	Cholesteryl ester 17:1	Cholesteryl Esters	2.8	2.7	1.4	4.2	2.1	3.2	1.1	0.78	93	1.06	30
CE 18:0	Cholesteryl ester 18:0	Cholesteryl Esters	14	13	7.8	18	11	16	4.4	2.8	100	0.29215	30
CE 18:1	Cholesteryl ester 18:1	Cholesteryl Esters	283	288	157	547	226	323	97	88	100	1.3125	30
CE 18:2	Cholesteryl ester 18:2	Cholesteryl Esters	1405	1399	752	2109	1165	1558	392	329	100	14.28	30
CE 18:3	Cholesteryl ester 18:3	Cholesteryl Esters	59	59	24	98	48	73	25	19	100	0.226	30
CE 20:0	Cholesteryl ester 20:0	Cholesteryl Esters	2.7	4.5	2.2	14	2.4	5.7	3.3	4.5	20	4.413	30
CE 20:1	Cholesteryl ester 20:1	Cholesteryl Esters	0.52	0.52	0.24	0.83	0.39	0.64	0.26	0.18	27	0.618	30
CE 20:3	Cholesteryl ester 20:3	Cholesteryl Esters	20	21	11	35	17	26	8.9	5.8	100	0.183	30
CE 20:4	Cholesteryl ester 20:4	Cholesteryl Esters	267	270	143	399	233	306	74	61	100	0.549	30
CE 20:5	Cholesteryl ester 20:5	Cholesteryl Esters	93	97	23	243	46	132	86	61	100	0.4255	30
CE 22:0	Cholesteryl ester 22:0	Cholesteryl Esters			0.21	0.21					3.3	0.108	30
CE 22:1	Cholesteryl ester 22:1	Cholesteryl Esters	0.11	0.13	0.096	0.18	0.096			0.045	10	0.147	30
CE 22:2	Cholesteryl ester 22:2	Cholesteryl Esters	0.058	0.069	0.029	0.16	0.048	0.076	0.028	0.044	23	0.169	30
CE 22:5	Cholesteryl ester 22:5	Cholesteryl Esters	2.6	2.8	1.7	4.2	2.3	3.1	0.75	0.74	100	0.88	30
CE 22:6	Cholesteryl ester 22:6	Cholesteryl Esters	51	54	31	93	44	63	19	16	100	0.3	30
p-Cresol-SO4	p-Cresol sulfate	Cresols	52	50	0.49	110	39	67	28	23	100	0.01	30
DG 14:0_14:0	Diacylglyceride 14:0_14:0	Diglycerides									0	0.3475	30
DG 14:0_18:1	Diacylglyceride 14:0_18:1	Diglycerides	0.89	0.89	0.57	1.2				0.46	6.7	0.6975	30
DG 14:0_18:2	Diacylglyceride 14:0_18:2	Diglycerides	0.38	0.45	0.34	0.9	0.35	0.41	0.058	0.2	23	0.334	30
DG 14:0_20:0	Diacylglyceride 14:0_20:0	Diglycerides	0.11	0.11	0.0007	0.21				0.15	6.7	0.0698	30
DG 14:1_18:1	Diacylglyceride 14:1_18:1	Diglycerides	0.14	0.17	0.1	0.28	0.11	0.25	0.14	0.079	13	0.09721	30
DG 14:1_20:2	Diacylglyceride 14:1_20:2	Diglycerides	0.86	0.77	0.012	1.1	0.56	1	0.49	0.4	20	0.1135	30
DG 16:0_16:0	Diacylglyceride 16:0_16:0	Diglycerides									0	23.3	30
DG 16:0_16:1	Diacylglyceride 16:0_16:1	Diglycerides	0.53	0.51	0.18	0.89	0.29	0.72	0.44	0.26	17	0.2565	30
DG 16:0_18:1	Diacylglyceride 16:0_18:1	Diglycerides	2	2.4	1.1	5.5	1.5	3	1.5	1.1	83	0.573	30
DG 16:0_18:2	Diacylglyceride 16:0_18:2	Diglycerides	1.4	1.6	0.49	4	1.1	2.1	1	0.77	100	0.48	30
DG 16:0_20:0	Diacylglyceride 16:0_20:0	Diglycerides									0	0.9455	30
DG 16:0_20:3	Diacylglyceride 16:0_20:3	Diglycerides	0.11	0.11	0.1	0.11				0.0074	6.7	0.1155	30
DG 16:0_20:4	Diacylglyceride 16:0_20:4	Diglycerides	0.38	0.38	0.3	0.45				0.1	6.7	0.189	30
DG 16:1_18:0	Diacylglyceride 16:1_18:0	Diglycerides	0.061	0.12	0.039	0.41	0.049	0.16	0.11	0.14	20	0.125	30
DG 16:1_18:1	Diacylglyceride 16:1_18:1	Diglycerides	1.7	2	0.73	5.6	1.5	2.1	0.6	1.3	37	0.4415	30
DG 16:1_18:2	Diacylglyceride 16:1_18:2	Diglycerides	0.49	0.49	0.21	1.3	0.36	0.58	0.22	0.23	97	0.151	30
DG 16:1_20:0	Diacylglyceride 16:1_20:0	Diglycerides									0	0.234	30
DG 17:0_17:1	Diacylglyceride 17:0_17:1	Diglycerides			0.05	0.05					3.3	0.107	30
DG 17:0_18:1	Diacylglyceride 17:0_18:1	Diglycerides	0.5	0.56	0.39	1.1	0.41	0.66	0.24	0.18	90	0.188	30
DG 18:0_20:0	Diacylglyceride 18:0_20:0	Diglycerides	0.68	0.68	0.037	1.3				0.91	6.7	0.417	30
DG 18:0_20:4	Diacylglyceride 18:0_20:4	Diglycerides	0.091	0.075	0.028	0.11	0.028			0.042	10	0.1225	30
DG 18:1_18:1	Diacylglyceride 18:1_18:1	Diglycerides	1.8	2.2	0.83	5.5	1.5	2.9	1.4	1.1	100	0.516	30
DG 18:1_18:2	Diacylglyceride 18:1_18:2	Diglycerides	6.4	6.5	2.6	13	4.6	7.7	3.1	2.4	97	1.63	30
DG 18:1_18:3	Diacylglyceride 18:1_18:3	Diglycerides	0.46	0.63	0.37	1.3	0.38	0.9	0.52	0.36	27	0.339	30
DG 18:1_18:4	Diacylglyceride 18:1_18:4	Diglycerides			0.12	0.12					3.3	0.17015	30
DG 18:1_20:0	Diacylglyceride 18:1_20:0	Diglycerides	0.33	0.53	0.2	1.4	0.22	0.94	0.71	0.48	17	0.271	30
DG 18:1_20:1	Diacylglyceride 18:1_20:1	Diglycerides	0.021	0.027	0.018	0.043	0.018			0.014	10	0.0322042	30
DG 18:1_20:2	Diacylglyceride 18:1_20:2	Diglycerides	0.22	0.23	0.074	0.39	0.12	0.35	0.23	0.12	27	0.119	30
DG 18:1_20:3	Diacylglyceride 18:1_20:3	Diglycerides	0.08	0.12	0.069	0.24	0.073	0.17	0.1	0.065	23	0.07755	30
DG 18:1_20:4	Diacylglyceride 18:1_20:4	Diglycerides			0.48	0.48					3.3	0.185	30
DG 18:1_22:5	Diacylglyceride 18:1_22:5	Diglycerides	0.017	0.017	0.016	0.019				0.0021	6.7	0.0133982	30
DG 18:1_22:6	Diacylglyceride 18:1_22:6	Diglycerides	0.29	0.3	0.022	0.64	0.12	0.46	0.34	0.21	20	0.29595	30
DG 18:2_18:2	Diacylglyceride 18:2_18:2	Diglycerides	4.2	4.6	1.9	11	3.2	5.3	2.2	2	100	0.605	30
DG 18:2_18:3	Diacylglyceride 18:2_18:3	Diglycerides	0.41	0.46	0.25	0.85	0.34	0.6	0.25	0.17	83	0.152	30
DG 18:2_18:4	Diacylglyceride 18:2_18:4	Diglycerides	0.14	0.15	0.12	0.2	0.12			0.041	10	0.1419	30
DG 18:2_20:0	Diacylglyceride 18:2_20:0	Diglycerides	0.15	0.22	0.046	0.53	0.067	0.44	0.37	0.21	13	0.122	30
DG 18:2_20:4	Diacylglyceride 18:2_20:4	Diglycerides	0.22	0.34	0.14	0.69	0.16	0.58	0.43	0.24	17	0.1805	30
DG 18:3_18:3	Diacylglyceride 18:3_18:3	Diglycerides									0	0.1605	30
DG 18:3_20:2	Diacylglyceride 18:3_20:2	Diglycerides									0	0.176	30
DG 21:0_22:6	Diacylglyceride 21:0_22:6	Diglycerides									0	0.407	30
DG 22:1_22:2	Diacylglyceride 22:1_22:2	Diglycerides	0.0012	0.0014	0.0011	0.0018	0.0011			0.0004	10	0.1235	30
DG O-14:0_18:2	Diacylglyceride O-14:0_18:2	Diglycerides									0	0.804	30
DG O-16:0_18:1	Diacylglyceride O-16:0_18:1	Diglycerides	0.041	0.041	0.034	0.048				0.01	6.7	0.1255	30
DG O-16:0_20:4	Diacylglyceride O-16:0_20:4	Diglycerides									0	0.0461062	24
DG O-18:2_18:2	Diacylglyceride O-18:2_18:2	Diglycerides									0	0.0829	6
Hex2Cer d18:1/14:0	Dihexosylceramide d18:1/14:0	Dihexosylceramides	0.26	0.28	0.13	0.61	0.21	0.32	0.11	0.093	93	0.0259557	30
Hex2Cer d18:1/16:0	Dihexosylceramide d18:1/16:0	Dihexosylceramides	3	3.1	1.9	5.7	2.5	3.5	0.95	0.8	100	0.01082	30
Hex2Cer d18:1/18:0	Dihexosylceramide d18:1/18:0	Dihexosylceramides	0.27	0.28	0.11	0.43	0.25	0.31	0.061	0.059	100	0.0339	30
Hex2Cer d18:1/20:0	Dihexosylceramide d18:1/20:0	Dihexosylceramides	0.14	0.15	0.1	0.19	0.13	0.16	0.035	0.022	97	0.105	30
Hex2Cer d18:1/22:0	Dihexosylceramide d18:1/22:0	Dihexosylceramides	0.32	0.33	0.17	0.63	0.24	0.38	0.14	0.11	100	0.077	30
Hex2Cer d18:1/24:0	Dihexosylceramide d18:1/24:0	Dihexosylceramides	0.28	0.28	0.14	0.46	0.21	0.32	0.11	0.085	97	0.133	30
Hex2Cer d18:1/24:1	Dihexosylceramide d18:1/24:1	Dihexosylceramides	0.46	0.46	0.27	0.73	0.35	0.53	0.18	0.13	100	0.003615	30
Hex2Cer d18:1/26:0	Dihexosylceramide d18:1/26:0	Dihexosylceramides	0.014	0.015	0.0095	0.023	0.011	0.017	0.0068	0.0047	23	0.006	30
Hex2Cer d18:1/26:1	Dihexosylceramide d18:1/26:1	Dihexosylceramides	0.024	0.023	0.009	0.044	0.012	0.031	0.019	0.011	33	0.606	30
Cer d18:0/18:0	Dihydroceramide d18:0/18:0	Dihydroceramides	0.018	0.019	0.0057	0.034	0.01	0.03	0.02	0.01	27	0.03455	30
Cer d18:0/18:0-OH	Dihydroceramide d18:0/18:0-OH	Dihydroceramides			0.41	0.41					3.3	0.00583	30
Cer d18:0/20:0	Dihydroceramide d18:0/20:0	Dihydroceramides	0.0019	0.0086	0.0008	0.051	0.001	0.0022	0.0012	0.019	23	0.07019	30
Cer d18:0/22:0	Dihydroceramide d18:0/22:0	Dihydroceramides	0.26	0.28	0.14	0.46	0.18	0.38	0.2	0.11	37	0.097	30
Cer d18:0/24:0	Dihydroceramide d18:0/24:0	Dihydroceramides	0.36	0.38	0.22	0.7	0.27	0.48	0.21	0.13	100	0.093	30
Cer d18:0/24:1	Dihydroceramide d18:0/24:1	Dihydroceramides	0.26	0.27	0.14	0.47	0.21	0.3	0.092	0.077	100	0.402	30
Cer d18:0/26:1	Dihydroceramide d18:0/26:1	Dihydroceramides	0.02	0.02	0.014	0.026				0.0085	6.7	0.8	30
Cer d18:0/26:1-OH	Dihydroceramide d18:0/26:1-OH	Dihydroceramides	1	1.2	0.23	2.5	0.23	2.3	2.1	1.1	13	0.035385	30
FA 12:0	Dodecanoic acid	Fatty Acids									0	228.567	30
FA 14:0	Myristic acid	Fatty Acids									0	738.192	30
FA 16:0	Palmitic acid	Fatty Acids									0	690.389	30
FA 18:0	Stearic acid	Fatty Acids									0	64	30
FA 18:1	Octadecenoic acid	Fatty Acids	163	182	95	353	141	217	75	64	100	3.4155	30
FA 18:2	Octadecadienoic acid	Fatty Acids	53	54	14	143	38	59	21	27	100	0.515	30
FA 20:1	Eicosenoic acid	Fatty Acids	1.7	1.9	0.86	5.6	1.4	2.3	0.87	0.91	97	0.6955	30
FA 20:2	Eicosadienoic acid	Fatty Acids	1.3	1.4	0.43	3.3	0.88	1.8	0.9	0.68	97	0.25	30
FA 20:3	Eicosatrienoic acid	Fatty Acids	0.67	0.75	0.31	1.3	0.53	0.99	0.46	0.31	83	0.0123	30
FA 20:4	Arachidonic acid	Fatty Acids	3.8	4.2	1.1	9.3	2.2	5.5	3.3	2.3	67	1.681	30
FA 20:5	Eicosapentaenoic acid	Fatty Acids	0.58	0.81	0.12	3	0.42	1.2	0.76	0.61	100	16.493	30
FA 22:6	Docosahexaenoic acid	Fatty Acids	7.6	7.9	2.9	16	5.4	10	4.8	3.2	100	0.117	30
Hex-Cer d16:1/20:0	Hexosylceramide d16:1/20:0	Hexosylceramides	0.04	0.041	0.029	0.06	0.035	0.046	0.011	0.01	100	0.017	6
Hex-Cer d16:1/22:0	Hexosylceramide d16:1/22:0	Hexosylceramides	0.053	0.054	0.025	0.095	0.037	0.064	0.027	0.019	97	0.0148	30
Hex-Cer d16:1/24:0	Hexosylceramide d16:1/24:0	Hexosylceramides	0.037	0.04	0.027	0.092	0.03	0.043	0.013	0.014	87	0.02585	30
Hex-Cer d18:1/14:0	Hexosylceramide d18:1/14:0	Hexosylceramides	0.034	0.034	0.027	0.043	0.029	0.036	0.0072	0.0051	27	0.0198	30
Hex-Cer d18:1/16:0	Hexosylceramide d18:1/16:0	Hexosylceramides	1.3	1.3	0.73	1.9	1.1	1.5	0.4	0.26	100	0.0707	30
Hex-Cer d18:1/18:0	Hexosylceramide d18:1/18:0	Hexosylceramides	0.21	0.21	0.12	0.38	0.17	0.24	0.066	0.054	100	0.0319	30
Hex-Cer d18:1/18:1	Hexosylceramide d18:1/18:1	Hexosylceramides	0.1	0.11	0.063	0.16	0.092	0.11	0.019	0.024	100	0.103	30
Hex-Cer d18:1/20:0	Hexosylceramide d18:1/20:0	Hexosylceramides	0.32	0.32	0.18	0.44	0.25	0.4	0.15	0.082	97	0.03776	30
Hex-Cer d18:1/22:0	Hexosylceramide d18:1/22:0	Hexosylceramides	3.2	3.6	1.8	7.7	2.5	4.3	1.7	1.4	100	0.03923	30
Hex-Cer d18:1/23:0	Hexosylceramide d18:1/23:0	Hexosylceramides	1.6	1.6	0.79	2.5	1.3	2	0.65	0.42	100	0.023905	30
Hex-Cer d18:1/24:0	Hexosylceramide d18:1/24:0	Hexosylceramides	1.7	1.9	1.2	4.1	1.5	2.1	0.67	0.65	100	0.1495	30
Hex-Cer d18:1/24:1	Hexosylceramide d18:1/24:1	Hexosylceramides	3.9	4.2	2.2	6.2	3.4	5.2	1.8	1.1	100	0.03788	30
Hex-Cer d18:1/26:0	Hexosylceramide d18:1/26:0	Hexosylceramides	0.082	0.088	0.055	0.14	0.076	0.099	0.023	0.019	70	0.050635	30
Hex-Cer d18:1/26:1	Hexosylceramide d18:1/26:1	Hexosylceramides	0.094	0.099	0.048	0.14	0.082	0.13	0.046	0.028	40	0.009915	30
Hex-Cer d18:2/16:0	Hexosylceramide d18:2/16:0	Hexosylceramides	0.017	0.018	0.013	0.023	0.015	0.021	0.006	0.0033	27	0.01368	30
Hex-Cer d18:2/18:0	Hexosylceramide d18:2/18:0	Hexosylceramides	0.036	0.037	0.02	0.082	0.03	0.044	0.014	0.012	93	0.014665	30
Hex-Cer d18:2/20:0	Hexosylceramide d18:2/20:0	Hexosylceramides	0.019	0.02	0.014	0.03	0.015	0.022	0.0064	0.0052	27	0.176	30
Hex-Cer d18:2/22:0	Hexosylceramide d18:2/22:0	Hexosylceramides	0.7	0.77	0.32	2.1	0.53	0.88	0.34	0.34	97	0.0856	30
Hex-Cer d18:2/23:0	Hexosylceramide d18:2/23:0	Hexosylceramides	0.34	0.37	0.17	0.66	0.27	0.46	0.19	0.13	97	0.333	30
Hex-Cer d18:2/24:0	Hexosylceramide d18:2/24:0	Hexosylceramides	0.88	0.96	0.46	2.2	0.72	1.1	0.43	0.35	97	0.01	30
AbsAcid	Abscisic acid	Hormones and Related									0	0.05813	30
Cortisol	Cortisol	Hormones and Related	0.31	0.31	0.092	0.58	0.2	0.4	0.2	0.12	100	0.06498	30
Cortisone	Cortisone	Hormones and Related	0.09	0.09	0.074	0.12	0.082	0.098	0.017	0.01	63	0.0851258	30
DHEAS	Dehydroepiandrosterone sulfate	Hormones and Related	1.2	1.3	0.42	4.3	0.78	1.6	0.8	0.87	97	0.018	30
3-IAA	Indoleacetic acid	Indoles and Derivatives	2.2	2.3	1	7.3	1.5	2.7	1.3	1.3	100	0.0625	30
3-IPA	Indolepropionic acid	Indoles and Derivatives	0.74	0.98	0.28	6.1	0.45	1.1	0.67	1.1	97	0.0110957	30
Indole	Indole	Indoles and Derivatives									0	12.1905	30
Ind-SO4	Indoxyl sulfate	Indoles and Derivatives	6.5	6.7	0.89	14	4.1	8.8	4.7	3.3	100	78	30
LPC 14:0	Lysophosphatidylcholine 14:0	Lysophosphatidylcholines	6.1	6	3.7	8.4	4.7	6.8	2.1	1.5	23	0.2525	30
LPC 16:0	Lysophosphatidylcholine 16:0	Lysophosphatidylcholines	105	102	58	153	79	117	38	24	100	0.079	30
LPC 16:1	Lysophosphatidylcholine 16:1	Lysophosphatidylcholines	2.3	2.3	1.4	3.4	1.9	2.8	0.94	0.54	100	0.04279	30
LPC 17:0	Lysophosphatidylcholine 17:0	Lysophosphatidylcholines	1.8	1.9	0.91	2.7	1.4	2.3	0.88	0.51	100	0.4095	30
LPC 18:0	Lysophosphatidylcholine 18:0	Lysophosphatidylcholines	35	36	20	59	29	43	14	9.5	100	0.142	30
LPC 18:1	Lysophosphatidylcholine 18:1	Lysophosphatidylcholines	20	21	11	40	15	23	7.5	6.9	100	0.214	30
LPC 18:2	Lysophosphatidylcholine 18:2	Lysophosphatidylcholines	37	38	14	78	25	47	22	16	100	0.156	30
LPC 20:3	Lysophosphatidylcholine 20:3	Lysophosphatidylcholines	1.8	1.9	1.1	3.8	1.4	2.1	0.7	0.62	100	0.058535	30
LPC 20:4	Lysophosphatidylcholine 20:4	Lysophosphatidylcholines	7.4	7.4	4.2	13	5.7	8.5	2.8	2	100	0.0727	30
LPC 24:0	Lysophosphatidylcholine 24:0	Lysophosphatidylcholines	0.17	0.17	0.099	0.35	0.12	0.21	0.092	0.06	100	0.0895	30
LPC 26:0	Lysophosphatidylcholine 26:0	Lysophosphatidylcholines	0.18	0.21	0.13	0.36	0.16	0.29	0.13	0.075	83	0.0619	30
LPC 26:1	Lysophosphatidylcholine 26:1	Lysophosphatidylcholines	0.2	0.19	0.08	0.35	0.12	0.23	0.12	0.075	93	0.166	30
Hypoxanthine	Hypoxanthine	Nucleobases and Related	3.5	3.3	0.57	7.1	1.8	4.2	2.4	1.8	77	0.4	30
Xanthine	Xanthine	Nucleobases and Related	0.59	0.64	0.47	0.98	0.51	0.71	0.2	0.16	53	0.03922	30
PC 24:0	Phosphatidylcholine 24:0	Phosphatidylcholines	0.085	0.092	0.035	0.19	0.056	0.12	0.06	0.046	30	0.8725	30
PC 26:0	Phosphatidylcholine 26:0	Phosphatidylcholines			0.84	0.84					3.3	0.03336	30
PC 28:1	Phosphatidylcholine 28:1	Phosphatidylcholines	3.6	3.6	2.1	5.4	3.1	4.1	0.97	0.74	100	0.122	30
PC 30:0	Phosphatidylcholine 30:0	Phosphatidylcholines	3.6	3.6	1.6	7	3	4.3	1.3	1.1	100	0.02949	30
PC 30:2	Phosphatidylcholine 30:2	Phosphatidylcholines	0.1	0.07	0.0009	0.11	0.0009			0.06	12	0.0151042	24
PC 32:0	Phosphatidylcholine 32:0	Phosphatidylcholines	12	12	8.5	17	11	14	2.7	2.2	100	0.48	30
PC 32:1	Phosphatidylcholine 32:1	Phosphatidylcholines	7.7	8.2	3.6	15	5.2	11	5.8	3.3	100	0.00633	30
PC 32:2	Phosphatidylcholine 32:2	Phosphatidylcholines	3.4	4	1.1	15	2.2	4.7	2.5	2.8	97	0.096345	30
PC 32:3	Phosphatidylcholine 32:3	Phosphatidylcholines	0.66	0.69	0.41	1.3	0.56	0.82	0.26	0.18	100	0.174	30
PC 34:1	Phosphatidylcholine 34:1	Phosphatidylcholines	151	153	94	254	127	173	47	34	100	0.061205	30
PC 34:2	Phosphatidylcholine 34:2	Phosphatidylcholines	358	364	244	553	305	418	113	75	100	0.0141726	30
PC 34:3	Phosphatidylcholine 34:3	Phosphatidylcholines	14	14	6.2	22	12	17	5.2	3.7	100	0.282	30
PC 34:4	Phosphatidylcholine 34:4	Phosphatidylcholines	1.7	1.8	0.65	4.2	1.3	2.1	0.81	0.72	100	0.04206	30
PC 36:0	Phosphatidylcholine 36:0	Phosphatidylcholines	1.9	2	0.8	3.7	1.7	2.4	0.76	0.66	100	0.1185	30
PC 36:1	Phosphatidylcholine 36:1	Phosphatidylcholines	41	42	29	68	37	47	9.7	8.5	100	0.05691	30
PC 36:2	Phosphatidylcholine 36:2	Phosphatidylcholines	220	233	156	366	190	269	79	50	100	0.083375	30
PC 36:3	Phosphatidylcholine 36:3	Phosphatidylcholines	107	113	71	177	99	131	32	24	100	0.027775	30
PC 36:4	Phosphatidylcholine 36:4	Phosphatidylcholines	182	180	112	245	155	209	54	34	100	0.00875	30
PC 36:5	Phosphatidylcholine 36:5	Phosphatidylcholines	23	26	8.1	60	14	36	22	14	100	0.97	30
PC 36:6	Phosphatidylcholine 36:6	Phosphatidylcholines	0.96	1	0.42	2.1	0.76	1.4	0.61	0.39	100	0.03304	30
PC 38:0	Phosphatidylcholine 38:0	Phosphatidylcholines	3.4	3.5	2.2	5.4	2.8	4.1	1.3	0.88	100	0.05754	30
PC 38:1	Phosphatidylcholine 38:1	Phosphatidylcholines	0.62	0.71	0.18	1.7	0.38	1	0.64	0.42	96	0.0385	24
PC 38:3	Phosphatidylcholine 38:3	Phosphatidylcholines	41	40	21	57	34	46	13	8.7	100	0.035	30
PC 38:4	Phosphatidylcholine 38:4	Phosphatidylcholines	108	109	54	155	94	123	30	24	100	0.4305	30
PC 38:5	Phosphatidylcholine 38:5	Phosphatidylcholines	48	50	36	75	43	55	12	11	100	0.016525	30
PC 38:6	Phosphatidylcholine 38:6	Phosphatidylcholines	80	80	47	116	63	96	33	19	100	0.19	30
PC 40:1	Phosphatidylcholine 40:1	Phosphatidylcholines	0.52	0.52	0.4	0.62	0.46	0.59	0.13	0.08	20	0.0192925	30
PC 40:2	Phosphatidylcholine 40:2	Phosphatidylcholines	0.26	0.28	0.15	0.58	0.2	0.33	0.13	0.087	100	0.033	30
PC 40:3	Phosphatidylcholine 40:3	Phosphatidylcholines	0.43	0.46	0.29	0.71	0.38	0.53	0.16	0.11	100	0.219	30
PC 40:4	Phosphatidylcholine 40:4	Phosphatidylcholines	2.6	2.7	1.1	5.3	2.1	3.2	1.1	0.91	100	0.0424	30
PC 40:5	Phosphatidylcholine 40:5	Phosphatidylcholines	7.2	7.5	4.3	13	5.9	8.8	2.9	2.1	100	0.01122	30
PC 40:6	Phosphatidylcholine 40:6	Phosphatidylcholines	27	27	17	39	22	32	10	6.7	100	0.119	30
PC 42:0	Phosphatidylcholine 42:0	Phosphatidylcholines	0.53	0.54	0.36	0.75	0.45	0.63	0.18	0.11	100	0.01136	30
PC 42:1	Phosphatidylcholine 42:1	Phosphatidylcholines	0.3	0.31	0.19	0.44	0.25	0.36	0.12	0.074	100	0.011	30
PC 42:2	Phosphatidylcholine 42:2	Phosphatidylcholines	0.24	0.28	0.14	0.83	0.21	0.3	0.089	0.14	100	0.17	30
PC 42:4	Phosphatidylcholine 42:4	Phosphatidylcholines	0.15	0.16	0.1	0.35	0.13	0.18	0.056	0.049	100	0.135	30
PC 42:5	Phosphatidylcholine 42:5	Phosphatidylcholines	0.27	0.27	0.15	0.39	0.22	0.34	0.12	0.065	100	0.033	30
PC 42:6	Phosphatidylcholine 42:6	Phosphatidylcholines	0.39	0.43	0.24	0.68	0.34	0.51	0.17	0.12	97	0.05	30
PC O-28:0	Phosphatidylcholine O-28:0	Phosphatidylcholines	0.3	0.33	0.24	0.56	0.26	0.35	0.092	0.1	50	0.13	30
PC O-28:1	Phosphatidylcholine O-28:1	Phosphatidylcholines	0.36	0.38	0.14	0.57	0.27	0.48	0.21	0.11	100	0.495	30
PC O-30:0	Phosphatidylcholine O-30:0	Phosphatidylcholines	0.3	0.3	0.15	0.54	0.25	0.35	0.097	0.077	100	0.00852	30
PC O-30:1	Phosphatidylcholine O-30:1	Phosphatidylcholines	0.18	0.25	0.04	0.85	0.15	0.29	0.14	0.23	33	0.026175	30
PC O-30:2	Phosphatidylcholine O-30:2	Phosphatidylcholines	0.12	0.11	0.065	0.17	0.097	0.13	0.032	0.023	100	0.015695	30
PC O-32:1	Phosphatidylcholine O-32:1	Phosphatidylcholines	2.6	2.6	1.9	3.9	2.2	2.9	0.68	0.5	100	0.01855	30
PC O-32:2	Phosphatidylcholine O-32:2	Phosphatidylcholines	0.8	0.84	0.5	1.5	0.7	0.94	0.25	0.23	100	0.017	30
PC O-34:0	Phosphatidylcholine O-34:0	Phosphatidylcholines	1.3	1.2	0.54	2	0.95	1.4	0.49	0.33	100	0.027135	30
PC O-34:1	Phosphatidylcholine O-34:1	Phosphatidylcholines	7.7	7.9	5.9	12	6.5	8.3	1.8	1.5	100	0.335	30
PC O-34:2	Phosphatidylcholine O-34:2	Phosphatidylcholines	12	12	7.2	20	10	14	4.3	3	100	2.82	30
PC O-34:3	Phosphatidylcholine O-34:3	Phosphatidylcholines	10	10	5.3	16	8.1	13	4.4	2.8	100	0.040903	30
PC O-36:0	Phosphatidylcholine O-36:0	Phosphatidylcholines	0.74	0.79	0.43	1.2	0.64	0.93	0.29	0.2	100	0.01898	30
PC O-36:1	Phosphatidylcholine O-36:1	Phosphatidylcholines	6	6.4	3.8	10	5.5	7.3	1.8	1.3	100	0.030305	30
PC O-36:2	Phosphatidylcholine O-36:2	Phosphatidylcholines	13	13	7.6	18	10	15	4.7	2.8	100	0.01406	30
PC O-36:3	Phosphatidylcholine O-36:3	Phosphatidylcholines	7.9	7.7	4.4	11	6	8.8	2.7	1.8	100	0.685	30
PC O-36:4	Phosphatidylcholine O-36:4	Phosphatidylcholines	19	18	9.8	27	15	22	6.8	4.3	100	0.0099198	30
PC O-36:5	Phosphatidylcholine O-36:5	Phosphatidylcholines	14	14	8.6	20	11	16	5	3.2	100	0.00937	30
PC O-38:0	Phosphatidylcholine O-38:0	Phosphatidylcholines	2.2	2.3	1.3	3.6	1.8	2.7	0.94	0.65	100	0.013125	30
PC O-38:1	Phosphatidylcholine O-38:1	Phosphatidylcholines	0.26	0.3	0.048	0.62	0.15	0.47	0.32	0.17	73	0.02148	30
PC O-38:2	Phosphatidylcholine O-38:2	Phosphatidylcholines	1.4	1.6	0.69	2.9	1.3	1.8	0.48	0.45	100	0.028935	30
PC O-38:3	Phosphatidylcholine O-38:3	Phosphatidylcholines	2.9	3	1.9	4.7	2.6	3.4	0.82	0.69	100	0.010565	30
PC O-38:4	Phosphatidylcholine O-38:4	Phosphatidylcholines	12	12	6.6	16	10	14	3.4	2.4	100	0.0110284	30
PC O-38:5	Phosphatidylcholine O-38:5	Phosphatidylcholines	18	18	13	28	15	20	5	3.5	100	0.017	30
PC O-38:6	Phosphatidylcholine O-38:6	Phosphatidylcholines	8.6	8.9	5.8	13	7.4	10	2.9	2	100	0.020575	30
PC O-40:1	Phosphatidylcholine O-40:1	Phosphatidylcholines	1.3	1.4	0.83	3.2	1.1	1.6	0.49	0.46	100	0.063	30
PC O-40:2	Phosphatidylcholine O-40:2	Phosphatidylcholines	1.5	1.6	0.93	2.8	1.3	1.8	0.5	0.38	100	0.014	30
PC O-40:3	Phosphatidylcholine O-40:3	Phosphatidylcholines	0.85	0.87	0.56	1.2	0.77	0.99	0.22	0.17	100	0.0194	30
PC O-40:4	Phosphatidylcholine O-40:4	Phosphatidylcholines	2	2.1	1.3	3.1	1.8	2.4	0.57	0.42	100	0.696	30
PC O-40:5	Phosphatidylcholine O-40:5	Phosphatidylcholines	3.1	3.1	2.2	4.9	2.7	3.4	0.7	0.59	100	0.08374	30
PC O-40:6	Phosphatidylcholine O-40:6	Phosphatidylcholines	4.6	4.5	3.1	6	3.9	4.9	1	0.79	100	0.02857	30
PC O-42:0	Phosphatidylcholine O-42:0	Phosphatidylcholines	0.46	0.49	0.4	0.62	0.42	0.59	0.17	0.086	20	0.01807	30
PC O-42:1	Phosphatidylcholine O-42:1	Phosphatidylcholines	0.34	0.35	0.17	0.58	0.3	0.4	0.097	0.083	100	0.167	30
PC O-42:2	Phosphatidylcholine O-42:2	Phosphatidylcholines	0.49	0.5	0.3	0.67	0.41	0.58	0.17	0.1	100	0.673	30
PC O-42:3	Phosphatidylcholine O-42:3	Phosphatidylcholines	0.73	0.74	0.48	1.2	0.55	0.88	0.33	0.2	100	0.06	30
PC O-42:4	Phosphatidylcholine O-42:4	Phosphatidylcholines	0.71	0.74	0.44	1.1	0.61	0.86	0.24	0.17	100	0.118	30
PC O-42:5	Phosphatidylcholine O-42:5	Phosphatidylcholines	1.7	1.6	1.2	2.2	1.4	1.8	0.43	0.28	100	0.072785	30
PC O-44:3	Phosphatidylcholine O-44:3	Phosphatidylcholines	0.12	0.12	0.068	0.19	0.099	0.13	0.03	0.027	100	0.07648	30
PC O-44:4	Phosphatidylcholine O-44:4	Phosphatidylcholines	0.26	0.27	0.19	0.43	0.22	0.3	0.073	0.057	90	0.02028	30
PC O-44:5	Phosphatidylcholine O-44:5	Phosphatidylcholines	1.1	1.1	0.61	1.5	0.95	1.3	0.31	0.23	100	0.004	30
PC O-44:6	Phosphatidylcholine O-44:6	Phosphatidylcholines	1.1	1.1	0.73	1.7	0.93	1.3	0.39	0.24	100	0.021	30
SM 33:1	Sphingomyelin 33:1	Sphingomyelins	5.4	5.4	3.5	8.1	4.7	6.3	1.6	1.1	100	0.009	30
SM 34:1	Sphingomyelin 34:1	Sphingomyelins	108	108	73	147	94	121	28	18	100	0.009	30
SM 34:2	Sphingomyelin 34:2	Sphingomyelins	16	17	12	26	13	19	5.1	3.5	100	0.005	30
SM 35:1	Sphingomyelin 35:1	Sphingomyelins	3	3.1	1.8	4.6	2.9	3.5	0.66	0.65	100	0.00719	30
SM 36:1	Sphingomyelin 36:1	Sphingomyelins	20	22	14	36	19	25	6.4	5.3	100	0.032	30
SM 36:2	Sphingomyelin 36:2	Sphingomyelins	11	11	7.2	19	9.3	12	3	2.7	100	0.031	30
SM 38:3	Sphingomyelin 38:3	Sphingomyelins	0.4	0.41	0.23	0.67	0.33	0.5	0.17	0.12	100	0.045	30
SM 40:4	Sphingomyelin 40:4	Sphingomyelins	0.092	0.16	0.03	0.73	0.065	0.15	0.08	0.2	50	0.0044	24
SM 41:1	Sphingomyelin 41:1	Sphingomyelins	12	12	8	17	10	13	3.4	2.2	100	0.08305	30
SM 41:2	Sphingomyelin 41:2	Sphingomyelins	9	9.2	6.1	14	8	10	2.4	1.8	100	0.032	30
SM 42:1	Sphingomyelin 42:1	Sphingomyelins	20	20	13	29	15	22	7	4.6	100	0.159	30
SM 42:2	Sphingomyelin 42:2	Sphingomyelins	39	40	25	60	34	46	13	8	100	0.325	30
SM 43:1	Sphingomyelin 43:1	Sphingomyelins	1	1	0.59	1.3	0.9	1.3	0.36	0.21	100	0.0216186	30
SM 44:1	Sphingomyelin 44:1	Sphingomyelins	0.15	0.15	0.066	0.24	0.12	0.17	0.043	0.038	100	0.629	30
SM 44:2	Sphingomyelin 44:2	Sphingomyelins	0.27	0.29	0.17	0.48	0.22	0.34	0.13	0.078	100	0.189	30
TG 14:0_32:2	Triacylglyceride 14:0_32:2	Triglycerides	1.1	1.4	0.27	6.2	0.48	1.5	1.1	1.3	73	0.216	30
TG 14:0_34:0	Triacylglyceride 14:0_34:0	Triglycerides	1.5	1.9	0.22	9.8	0.82	1.9	1.1	2.1	70	0.26075	30
TG 14:0_34:1	Triacylglyceride 14:0_34:1	Triglycerides	6.3	9.6	1.1	53	2.3	13	10	11	100	0.1175	30
TG 14:0_34:2	Triacylglyceride 14:0_34:2	Triglycerides	5.2	7.3	0.98	34	2.3	9.9	7.6	7	100	0.214	30
TG 14:0_34:3	Triacylglyceride 14:0_34:3	Triglycerides	1.4	1.7	0.28	7.6	0.63	2.3	1.7	1.6	100	1.075	30
TG 14:0_35:1	Triacylglyceride 14:0_35:1	Triglycerides	0.36	0.5	0.04	1.9	0.24	0.56	0.32	0.41	70	1.585	30
TG 14:0_35:2	Triacylglyceride 14:0_35:2	Triglycerides	0.39	0.5	0.16	1.4	0.29	0.59	0.3	0.34	63	0.108	30
TG 14:0_36:1	Triacylglyceride 14:0_36:1	Triglycerides	2.1	2.5	0.48	9.6	1.1	3	2	2.2	90	0.0715	30
TG 14:0_36:2	Triacylglyceride 14:0_36:2	Triglycerides	11	12	3.1	35	6.1	16	10	8	100	0.0981	30
TG 14:0_36:3	Triacylglyceride 14:0_36:3	Triglycerides	12	14	4.2	35	8	18	9.7	8.3	100	0.0470066	30
TG 14:0_36:4	Triacylglyceride 14:0_36:4	Triglycerides	5.2	6	1.8	22	3.1	7.3	4.2	4.3	100	0.16	30
TG 14:0_38:4	Triacylglyceride 14:0_38:4	Triglycerides	0.39	0.48	0.072	1.5	0.27	0.65	0.37	0.3	90	0.204	30
TG 14:0_38:5	Triacylglyceride 14:0_38:5	Triglycerides	0.44	0.57	0.098	2.4	0.27	0.75	0.48	0.46	97	0.33	30
TG 14:0_39:3	Triacylglyceride 14:0_39:3	Triglycerides	0.04	0.04	0.036	0.044				0.0056	8.3	0.379	24
TG 14:0_40:5	Triacylglyceride 14:0_40:5	Triglycerides	0.41	0.41	0.06	0.74	0.21	0.62	0.42	0.25	100	0.216	6
TG 16:0_28:1	Triacylglyceride 16:0_28:1	Triglycerides	0.79	1.2	0.11	5.6	0.56	1.1	0.5	1.5	53	0.246	30
TG 16:0_28:2	Triacylglyceride 16:0_28:2	Triglycerides	0.41	0.73	0.2	3.2	0.32	0.67	0.35	0.85	53	0.08682	30
TG 16:0_30:2	Triacylglyceride 16:0_30:2	Triglycerides	1.1	1.6	0.21	7.4	0.56	2	1.5	1.8	83	0.441	30
TG 16:0_32:0	Triacylglyceride 16:0_32:0	Triglycerides	6.1	11	0.98	72	3.2	12	8.3	15	87	0.145	30
TG 16:0_32:1	Triacylglyceride 16:0_32:1	Triglycerides	10	17	1.6	111	3.8	21	17	21	100	0.701	30
TG 16:0_32:2	Triacylglyceride 16:0_32:2	Triglycerides	6	9.4	1	56	2.4	13	11	11	100	0.823	30
TG 16:0_32:3	Triacylglyceride 16:0_32:3	Triglycerides	1.1	1.7	0.21	11	0.53	2	1.5	2.2	100	0.491	30
TG 16:0_33:1	Triacylglyceride 16:0_33:1	Triglycerides	1.7	2.7	0.55	15	1.1	3.2	2.1	2.9	87	0.207	30
TG 16:0_33:2	Triacylglyceride 16:0_33:2	Triglycerides	1.1	1.5	0.29	6.8	0.65	1.8	1.1	1.3	90	0.332	30
TG 16:0_34:0	Triacylglyceride 16:0_34:0	Triglycerides	6.3	9.2	0.49	50	3.7	10	6.3	10	100	0.269	30
TG 16:0_34:1	Triacylglyceride 16:0_34:1	Triglycerides	48	66	15	291	24	80	56	60	100	0.166	30
TG 16:0_34:2	Triacylglyceride 16:0_34:2	Triglycerides	51	64	14	258	27	73	46	51	100	0.08668	30
TG 16:0_34:3	Triacylglyceride 16:0_34:3	Triglycerides	16	19	4.7	74	9	24	15	15	100	0.596	30
TG 16:0_34:4	Triacylglyceride 16:0_34:4	Triglycerides	1.8	2.2	0.65	9.2	1.1	2.9	1.8	1.7	100	0.508	30
TG 16:0_35:1	Triacylglyceride 16:0_35:1	Triglycerides	1.4	2.2	0.34	11	1.2	3	1.8	2.2	93	0.277	30
TG 16:0_35:2	Triacylglyceride 16:0_35:2	Triglycerides	2.5	3.2	0.68	12	1.5	4.2	2.7	2.5	100	0.088265	30
TG 16:0_35:3	Triacylglyceride 16:0_35:3	Triglycerides	1.3	1.6	0.54	4.9	0.72	2.1	1.4	1	100	0.185	30
TG 16:0_36:2	Triacylglyceride 16:0_36:2	Triglycerides	130	155	56	371	79	190	112	91	100	0.141	30
TG 16:0_36:3	Triacylglyceride 16:0_36:3	Triglycerides	161	196	83	431	134	227	94	98	100	0.186	30
TG 16:0_36:4	Triacylglyceride 16:0_36:4	Triglycerides	72	83	28	194	53	105	52	42	100	0.333	30
TG 16:0_36:5	Triacylglyceride 16:0_36:5	Triglycerides	9.3	11	3.5	26	6.7	13	6.2	5.7	100	0.655	30
TG 16:0_36:6	Triacylglyceride 16:0_36:6	Triglycerides	0.84	1.1	0.25	3.7	0.65	1.1	0.47	0.72	97	0.71	30
TG 16:0_37:3	Triacylglyceride 16:0_37:3	Triglycerides	0.61	0.73	0.34	1.5	0.44	1	0.57	0.36	83	0.072	30
TG 16:0_38:1	Triacylglyceride 16:0_38:1	Triglycerides	0.5	0.66	0.14	3.5	0.41	0.7	0.28	0.62	87	0.06085	30
TG 16:0_38:2	Triacylglyceride 16:0_38:2	Triglycerides	1.2	1.7	0.57	4.2	1	2.1	1	0.96	100	0.176	30
TG 16:0_38:3	Triacylglyceride 16:0_38:3	Triglycerides	2.5	3.2	1.1	7.2	1.9	4.5	2.6	1.7	100	0.07978	30
TG 16:0_38:4	Triacylglyceride 16:0_38:4	Triglycerides	3.5	4.4	1	12	2.4	6.3	3.9	2.6	100	0.14235	30
TG 16:0_38:5	Triacylglyceride 16:0_38:5	Triglycerides	4.9	5.6	1.5	17	3.1	8.2	5.1	3.3	100	0.0785	30
TG 16:0_38:6	Triacylglyceride 16:0_38:6	Triglycerides	3.4	3.9	1.4	11	2.4	5	2.6	2.1	100	0.1395	30
TG 16:0_38:7	Triacylglyceride 16:0_38:7	Triglycerides	0.99	1.2	0.46	2.8	0.75	1.5	0.73	0.61	97	0.219	30
TG 16:0_40:6	Triacylglyceride 16:0_40:6	Triglycerides	2.7	3.1	1.2	7.1	2	4.4	2.4	1.4	100	0.100895	30
TG 16:0_40:7	Triacylglyceride 16:0_40:7	Triglycerides	3.2	3.5	1.4	6.6	2.3	4.6	2.3	1.5	100	0.0718	30
TG 16:0_40:8	Triacylglyceride 16:0_40:8	Triglycerides	1.5	1.7	0.49	3.8	1.1	2.2	1.2	0.84	100	0.05202	30
TG 16:1_28:0	Triacylglyceride 16:1_28:0	Triglycerides	0.45	0.53	0.032	2.1	0.18	0.6	0.42	0.55	40	0.441	30
TG 16:1_30:1	Triacylglyceride 16:1_30:1	Triglycerides	0.75	0.97	0.11	4.9	0.41	0.99	0.59	1.1	60	0.183	30
TG 16:1_32:0	Triacylglyceride 16:1_32:0	Triglycerides	1.9	3.5	0.18	25	1.4	4.1	2.8	4.9	87	0.367	30
TG 16:1_32:1	Triacylglyceride 16:1_32:1	Triglycerides	3.5	4.7	1.1	25	2.2	5.7	3.5	4.9	83	0.233	30
TG 16:1_32:2	Triacylglyceride 16:1_32:2	Triglycerides	1.5	1.8	0.31	7	1	2.2	1.2	1.3	87	0.101	30
TG 16:1_33:1	Triacylglyceride 16:1_33:1	Triglycerides	0.59	0.77	0.23	3.2	0.43	0.88	0.45	0.61	73	0.165	30
TG 16:1_34:0	Triacylglyceride 16:1_34:0	Triglycerides	2.4	3.3	0.47	16	1.7	3.6	1.9	3.1	83	0.218	30
TG 16:1_34:1	Triacylglyceride 16:1_34:1	Triglycerides	19	22	4.2	93	9.5	28	18	18	100	0.1515	30
TG 16:1_34:2	Triacylglyceride 16:1_34:2	Triglycerides	14	16	4.2	57	7.9	19	11	11	100	0.087	30
TG 16:1_34:3	Triacylglyceride 16:1_34:3	Triglycerides	2.9	3.3	0.82	9.8	1.7	4.3	2.5	2	100	0.049255	30
TG 16:1_36:1	Triacylglyceride 16:1_36:1	Triglycerides	2.9	3.2	1.1	8.9	1.8	4.2	2.4	1.8	100	0.14	30
TG 16:1_36:2	Triacylglyceride 16:1_36:2	Triglycerides	17	18	6.2	41	12	23	11	8.7	100	0.147	30
TG 16:1_36:3	Triacylglyceride 16:1_36:3	Triglycerides	18	22	9.8	53	16	26	9.3	9.6	100	0.22	30
TG 16:1_36:4	Triacylglyceride 16:1_36:4	Triglycerides	8.1	9.2	4.4	22	6.5	11	4.3	4	100	0.225	30
TG 16:1_36:5	Triacylglyceride 16:1_36:5	Triglycerides	1.4	1.6	0.44	3.7	1.1	1.9	0.77	0.7	100	0.121	30
TG 16:1_38:3	Triacylglyceride 16:1_38:3	Triglycerides	0.4	0.49	0.22	1.2	0.35	0.59	0.24	0.22	97	0.177	30
TG 16:1_38:4	Triacylglyceride 16:1_38:4	Triglycerides	0.64	0.74	0.26	1.9	0.48	0.93	0.45	0.36	100	0.796	30
TG 16:1_38:5	Triacylglyceride 16:1_38:5	Triglycerides	0.85	0.96	0.39	2.5	0.64	1.2	0.6	0.45	100	0.473	30
TG 17:0_32:1	Triacylglyceride 17:0_32:1	Triglycerides	0.46	0.6	0.091	2.3	0.29	0.67	0.38	0.53	53	0.05679	30
TG 17:0_34:1	Triacylglyceride 17:0_34:1	Triglycerides	1.3	1.9	0.55	8.4	0.88	2.3	1.4	1.7	97	0.183	30
TG 17:0_34:2	Triacylglyceride 17:0_34:2	Triglycerides	1.4	1.7	0.56	6.1	0.98	1.9	0.95	1.1	100	0.2255	30
TG 17:0_34:3	Triacylglyceride 17:0_34:3	Triglycerides	0.45	0.5	0.12	2.1	0.3	0.57	0.26	0.37	97	0.601	30
TG 17:0_36:3	Triacylglyceride 17:0_36:3	Triglycerides	2.9	3.4	1.5	7.3	2.3	4.2	1.9	1.6	100	0.34	30
TG 17:0_36:4	Triacylglyceride 17:0_36:4	Triglycerides	1.4	1.6	0.64	3.1	1	2	1	0.67	100	0.226	30
TG 17:1_32:1	Triacylglyceride 17:1_32:1	Triglycerides	0.53	0.72	0.088	2.9	0.39	0.9	0.5	0.65	57	0.050025	30
TG 17:1_34:1	Triacylglyceride 17:1_34:1	Triglycerides	1.4	2.1	0.51	8.9	0.95	3.2	2.2	1.8	100	0.0569	30
TG 17:1_34:2	Triacylglyceride 17:1_34:2	Triglycerides	1.4	1.6	0.48	5.4	0.85	2	1.1	1	100	0.014	30
TG 17:1_34:3	Triacylglyceride 17:1_34:3	Triglycerides	0.39	0.45	0.079	1.5	0.27	0.58	0.32	0.27	90	0.019675	30
TG 17:1_36:3	Triacylglyceride 17:1_36:3	Triglycerides	1.3	1.5	0.72	3	0.97	1.8	0.85	0.65	100	0.02356	30
TG 17:1_36:4	Triacylglyceride 17:1_36:4	Triglycerides	0.68	0.77	0.34	1.5	0.52	0.95	0.43	0.32	100	0.093	30
TG 17:1_36:5	Triacylglyceride 17:1_36:5	Triglycerides	0.26	0.28	0.11	0.68	0.17	0.37	0.2	0.14	93	0.05748	30
TG 17:1_38:5	Triacylglyceride 17:1_38:5	Triglycerides	0.0084	0.049	0.0041	0.38	0.0056	0.011	0.0058	0.12	30	0.097	30
TG 17:1_38:6	Triacylglyceride 17:1_38:6	Triglycerides	0.02	0.021	0.008	0.04	0.014	0.027	0.013	0.0099	27	0.1019	30
TG 17:1_38:7	Triacylglyceride 17:1_38:7	Triglycerides	0.034	0.037	0.027	0.054	0.027	0.048	0.021	0.011	27	0.1239	30
TG 17:2_34:2	Triacylglyceride 17:2_34:2	Triglycerides	0.28	0.34	0.17	1	0.23	0.4	0.17	0.17	100	0.0401	30
TG 17:2_34:3	Triacylglyceride 17:2_34:3	Triglycerides	0.21	0.2	0.051	0.4	0.14	0.27	0.14	0.087	70	0.0539	30
TG 17:2_36:2	Triacylglyceride 17:2_36:2	Triglycerides	0.32	0.34	0.15	0.66	0.25	0.41	0.16	0.12	100	0.031795	30
TG 17:2_36:3	Triacylglyceride 17:2_36:3	Triglycerides	0.37	0.38	0.1	0.75	0.26	0.49	0.23	0.15	97	0.1675	30
TG 17:2_36:4	Triacylglyceride 17:2_36:4	Triglycerides	0.39	0.44	0.18	1.2	0.29	0.58	0.29	0.21	100	0.307	30
TG 17:2_38:5	Triacylglyceride 17:2_38:5	Triglycerides	0.18	0.2	0.059	0.62	0.12	0.25	0.13	0.12	97	0.132	30
TG 17:2_38:6	Triacylglyceride 17:2_38:6	Triglycerides	0.27	0.29	0.1	0.63	0.21	0.35	0.15	0.13	100	0.0759	30
TG 17:2_38:7	Triacylglyceride 17:2_38:7	Triglycerides	0.072	0.076	0.045	0.14	0.052	0.095	0.043	0.027	53	0.07783	30
TG 18:0_30:0	Triacylglyceride 18:0_30:0	Triglycerides	0.75	1.2	0.0021	7.2	0.4	1.2	0.82	1.7	60	0.218	30
TG 18:0_30:1	Triacylglyceride 18:0_30:1	Triglycerides	0.51	0.7	0.031	4	0.27	0.63	0.36	0.92	63	0.072495	30
TG 18:0_32:0	Triacylglyceride 18:0_32:0	Triglycerides	1.9	2.8	0.24	17	1.2	2.6	1.5	3.6	77	0.5	30
TG 18:0_32:1	Triacylglyceride 18:0_32:1	Triglycerides	1.6	2.4	0.35	16	0.8	2.6	1.8	3.1	97	2.56	30
TG 18:0_32:2	Triacylglyceride 18:0_32:2	Triglycerides	1.1	1.3	0.3	5.1	0.72	1.5	0.79	1.1	80	0.271	30
TG 18:0_34:2	Triacylglyceride 18:0_34:2	Triglycerides	7	8.7	2.2	33	4.4	10	5.8	6.8	100	0.135	30
TG 18:0_34:3	Triacylglyceride 18:0_34:3	Triglycerides	1.6	1.8	0.67	5.5	1	2	0.94	1	100	0.037365	30
TG 18:0_36:1	Triacylglyceride 18:0_36:1	Triglycerides	2	2.7	0.18	9.9	1.3	3.1	1.8	2.7	33	0.07297	30
TG 18:0_36:2	Triacylglyceride 18:0_36:2	Triglycerides	10	12	2.8	32	7.9	13	5.1	6.8	100	0.095	30
TG 18:0_36:3	Triacylglyceride 18:0_36:3	Triglycerides	14	15	5.8	31	12	18	6.3	5.9	100	1.5755	30
TG 18:0_36:4	Triacylglyceride 18:0_36:4	Triglycerides	7.1	8.2	4.2	16	5.6	11	5	3.4	100	0.248	30
TG 18:0_36:5	Triacylglyceride 18:0_36:5	Triglycerides	1.2	1.3	0.61	3	0.93	1.6	0.64	0.62	100	0.09108	30
TG 18:0_38:6	Triacylglyceride 18:0_38:6	Triglycerides	1.3	1.4	0.65	2.5	1	1.8	0.82	0.55	100	0.047	30
TG 18:0_38:7	Triacylglyceride 18:0_38:7	Triglycerides	0.37	0.4	0.2	0.86	0.31	0.43	0.13	0.15	100	0.0905	30
TG 18:1_26:0	Triacylglyceride 18:1_26:0	Triglycerides	0.74	1	0.15	3.6	0.35	0.95	0.6	1.1	50	0.663	30
TG 18:1_28:1	Triacylglyceride 18:1_28:1	Triglycerides	0.84	1.2	0.19	5	0.61	1.3	0.69	1.2	70	0.592	30
TG 18:1_30:0	Triacylglyceride 18:1_30:0	Triglycerides	7.8	12	1.3	66	2.7	16	14	14	100	0.402	30
TG 18:1_30:1	Triacylglyceride 18:1_30:1	Triglycerides	5	6.5	0.64	30	1.9	8.9	7	6.5	100	0.2255	30
TG 18:1_30:2	Triacylglyceride 18:1_30:2	Triglycerides	1.5	2.1	0.47	9.9	0.81	2.3	1.5	2	100	0.06903	30
TG 18:1_31:0	Triacylglyceride 18:1_31:0	Triglycerides	2	2.6	0.2	10	1.6	3.1	1.5	2.3	60	0.181	30
TG 18:1_32:0	Triacylglyceride 18:1_32:0	Triglycerides	28	39	9	163	16	49	34	34	100	0.2	30
TG 18:1_32:1	Triacylglyceride 18:1_32:1	Triglycerides	40	45	8.9	159	18	60	41	33	100	0.126	30
TG 18:1_32:2	Triacylglyceride 18:1_32:2	Triglycerides	15	16	5	44	8.7	20	12	9.4	100	0.195	30
TG 18:1_32:3	Triacylglyceride 18:1_32:3	Triglycerides	1.9	2.2	0.68	6.6	1.3	2.6	1.3	1.3	100	0.907	30
TG 18:1_33:0	Triacylglyceride 18:1_33:0	Triglycerides	1.5	2.3	0.61	11	1	3.1	2	2.3	97	0.561	30
TG 18:1_33:1	Triacylglyceride 18:1_33:1	Triglycerides	4.5	6	1.8	19	2.7	7.6	4.8	4.3	100	0.1655	30
TG 18:1_33:2	Triacylglyceride 18:1_33:2	Triglycerides	2.5	2.8	1.1	6.2	1.6	3.7	2.1	1.5	100	0.062285	30
TG 18:1_33:3	Triacylglyceride 18:1_33:3	Triglycerides	0.48	0.53	0.24	1.2	0.37	0.61	0.24	0.21	100	0.1195	30
TG 18:1_34:1	Triacylglyceride 18:1_34:1	Triglycerides	209	257	89	646	133	314	181	151	100	0.05142	30
TG 18:1_34:2	Triacylglyceride 18:1_34:2	Triglycerides	174	196	100	428	123	228	104	97	100	0.849	30
TG 18:1_34:3	Triacylglyceride 18:1_34:3	Triglycerides	28	32	17	65	23	38	15	13	100	0.69	30
TG 18:1_34:4	Triacylglyceride 18:1_34:4	Triglycerides	3.2	3.4	1.6	6.5	2.5	4.1	1.6	1.3	100	0.783	30
TG 18:1_35:2	Triacylglyceride 18:1_35:2	Triglycerides	3.8	4.6	1.8	13	2.8	5.7	2.9	2.5	100	15.8	30
TG 18:1_35:3	Triacylglyceride 18:1_35:3	Triglycerides	1.3	1.5	0.57	3.5	1	1.8	0.75	0.68	100	0.25	30
TG 18:1_36:0	Triacylglyceride 18:1_36:0	Triglycerides	2.7	3.7	0.56	17	2.1	4	1.9	3.4	67	0.07562	30
TG 18:1_36:1	Triacylglyceride 18:1_36:1	Triglycerides	24	26	6.4	66	18	29	11	14	100	0.216	30
TG 18:1_36:2	Triacylglyceride 18:1_36:2	Triglycerides	78	92	27	274	60	124	64	50	100	0.06176	30
TG 18:1_36:3	Triacylglyceride 18:1_36:3	Triglycerides	88	99	36	241	68	118	50	45	100	0.05392	30
TG 18:1_36:4	Triacylglyceride 18:1_36:4	Triglycerides	37	42	20	78	27	59	32	18	100	0.298	30
TG 18:1_36:5	Triacylglyceride 18:1_36:5	Triglycerides	8.5	9.5	3.7	22	6	12	5.7	4.4	100	0.125	30
TG 18:1_36:6	Triacylglyceride 18:1_36:6	Triglycerides	1.1	1.2	0.34	2.5	0.72	1.5	0.79	0.57	100	0.1525	30
TG 18:1_38:5	Triacylglyceride 18:1_38:5	Triglycerides	5.3	6.1	2.8	13	4.2	7.8	3.6	2.4	100	0.129	30
TG 18:1_38:6	Triacylglyceride 18:1_38:6	Triglycerides	4	4.4	1.9	9.3	3	5.1	2.2	1.7	100	0.411	30
TG 18:1_38:7	Triacylglyceride 18:1_38:7	Triglycerides	1.1	1.3	0.52	4.2	0.91	1.6	0.68	0.73	100	0.333	30
TG 18:2_28:0	Triacylglyceride 18:2_28:0	Triglycerides	1.1	1.8	0.21	7	0.58	2.3	1.7	2	83	0.229	30
TG 18:2_30:0	Triacylglyceride 18:2_30:0	Triglycerides	5	7.3	0.82	36	2.2	9.6	7.4	7.3	100	0.128	30
TG 18:2_30:1	Triacylglyceride 18:2_30:1	Triglycerides	2.6	3.9	0.55	15	1.5	4.7	3.2	3.7	100	0.208	30
TG 18:2_31:0	Triacylglyceride 18:2_31:0	Triglycerides	1.4	1.7	0.33	6.4	0.54	1.9	1.4	1.8	33	0.127	30
TG 18:2_32:0	Triacylglyceride 18:2_32:0	Triglycerides	23	27	5.4	98	13	31	18	20	100	0.078005	30
TG 18:2_32:1	Triacylglyceride 18:2_32:1	Triglycerides	26	28	8.3	81	14	34	20	18	100	0.2315	30
TG 18:2_32:2	Triacylglyceride 18:2_32:2	Triglycerides	9.3	11	2.9	40	6.5	11	4.6	7.3	100	0.495	30
TG 18:2_33:0	Triacylglyceride 18:2_33:0	Triglycerides	1.3	1.5	0.48	5.9	0.72	1.8	1.1	1.2	97	0.378	30
TG 18:2_33:1	Triacylglyceride 18:2_33:1	Triglycerides	3.3	3.8	1.2	9.7	2	5	3	2.2	100	0.1215	30
TG 18:2_33:2	Triacylglyceride 18:2_33:2	Triglycerides	1.7	1.8	0.72	4.4	1.2	2.1	0.88	0.81	100	0.057	30
TG 18:2_34:0	Triacylglyceride 18:2_34:0	Triglycerides	18	22	7.4	51	15	27	12	11	100	0.114	30
TG 18:2_34:1	Triacylglyceride 18:2_34:1	Triglycerides	150	180	74	419	121	207	86	93	100	0.06609	30
TG 18:2_34:2	Triacylglyceride 18:2_34:2	Triglycerides	111	131	47	308	85	167	82	64	100	0.047425	30
TG 18:2_34:3	Triacylglyceride 18:2_34:3	Triglycerides	18	20	10	48	14	24	9.6	8.9	100	0.566	30
TG 18:2_34:4	Triacylglyceride 18:2_34:4	Triglycerides	1.9	2.1	0.8	5.3	1.5	2.5	0.93	0.94	100	3.72	30
TG 18:2_35:1	Triacylglyceride 18:2_35:1	Triglycerides	3	3.5	1.7	7.7	2.1	4.2	2.1	1.7	100	8.23	30
TG 18:2_35:2	Triacylglyceride 18:2_35:2	Triglycerides	2.7	3	1.4	6.6	2	3.6	1.6	1.3	100	6.29	30
TG 18:2_35:3	Triacylglyceride 18:2_35:3	Triglycerides	0.97	1	0.35	1.9	0.77	1.3	0.54	0.38	100	0.2455	30
TG 18:2_36:0	Triacylglyceride 18:2_36:0	Triglycerides	1.9	2.1	0.71	4.9	1.4	2.6	1.1	0.96	100	0.052265	30
TG 18:2_36:1	Triacylglyceride 18:2_36:1	Triglycerides	16	18	7.5	37	13	22	9	7.4	100	0.039855	30
TG 18:2_36:2	Triacylglyceride 18:2_36:2	Triglycerides	52	58	26	126	40	75	35	25	100	0.03866	30
TG 18:2_36:3	Triacylglyceride 18:2_36:3	Triglycerides	45	54	25	112	35	76	41	25	100	0.04415	30
TG 18:2_36:4	Triacylglyceride 18:2_36:4	Triglycerides	19	26	9	74	15	34	20	15	100	0.066435	30
TG 18:2_36:5	Triacylglyceride 18:2_36:5	Triglycerides	5.1	6.3	1.5	22	4	6.6	2.6	4.4	100	0.1495	30
TG 18:2_38:4	Triacylglyceride 18:2_38:4	Triglycerides	2.6	2.9	1.5	5.9	2.2	3.6	1.3	1.1	100	0.418	30
TG 18:2_38:5	Triacylglyceride 18:2_38:5	Triglycerides	3.7	4.2	2.3	8.5	3.1	5.2	2	1.4	100	0.04214	30
TG 18:2_38:6	Triacylglyceride 18:2_38:6	Triglycerides	2.6	2.9	1	6.2	2.2	3.8	1.5	1.1	100	0.1155	30
TG 18:3_30:0	Triacylglyceride 18:3_30:0	Triglycerides	0.58	1	0.064	5.7	0.35	1.3	0.93	1.2	93	0.158	30
TG 18:3_32:0	Triacylglyceride 18:3_32:0	Triglycerides	2.4	3.2	0.58	13	1.4	4	2.5	2.8	100	0.1065	30
TG 18:3_32:1	Triacylglyceride 18:3_32:1	Triglycerides	2.8	3.4	0.55	12	1.8	4.3	2.5	2.4	100	0.070245	30
TG 18:3_33:2	Triacylglyceride 18:3_33:2	Triglycerides	0.12	0.14	0.029	0.31	0.098	0.17	0.068	0.076	33	0.123	30
TG 18:3_34:0	Triacylglyceride 18:3_34:0	Triglycerides	2.3	2.5	0.77	6.8	1.5	3.1	1.7	1.4	100	0.06133	30
TG 18:3_34:1	Triacylglyceride 18:3_34:1	Triglycerides	20	21	6.4	48	13	24	11	9.8	100	0.0804964	30
TG 18:3_34:2	Triacylglyceride 18:3_34:2	Triglycerides	12	14	4.6	32	9.9	17	7.6	6.7	100	0.07724	30
TG 18:3_34:3	Triacylglyceride 18:3_34:3	Triglycerides	2.2	2.4	0.55	5.5	1.7	2.6	0.91	1.1	100	0.068	30
TG 18:3_35:2	Triacylglyceride 18:3_35:2	Triglycerides	0.44	0.46	0.14	0.9	0.35	0.58	0.22	0.18	100	0.152	30
TG 18:3_36:1	Triacylglyceride 18:3_36:1	Triglycerides	2.1	2.4	0.99	5.6	1.8	3.1	1.3	0.97	100	0.113	30
TG 18:3_36:2	Triacylglyceride 18:3_36:2	Triglycerides	8.5	9.3	3.3	17	6.4	11	4.9	3.8	100	0.245	30
TG 18:3_36:3	Triacylglyceride 18:3_36:3	Triglycerides	8.4	10	3.6	25	6.3	13	6.7	4.8	100	0.1235	30
TG 18:3_36:4	Triacylglyceride 18:3_36:4	Triglycerides	3.4	4.3	1.2	14	2.7	4.5	1.8	2.7	100	0.428	30
TG 18:3_38:5	Triacylglyceride 18:3_38:5	Triglycerides	0.73	0.79	0.28	1.7	0.6	0.91	0.32	0.3	100	0.18	30
TG 18:3_38:6	Triacylglyceride 18:3_38:6	Triglycerides	0.47	0.6	0.17	1.3	0.32	0.72	0.41	0.32	97	0.1135	30
TG 20:0_32:3	Triacylglyceride 20:0_32:3	Triglycerides	0.43	0.53	0.22	1.2	0.3	0.68	0.38	0.29	100	0.039	30
TG 20:0_32:4	Triacylglyceride 20:0_32:4	Triglycerides	0.53	0.6	0.23	1.2	0.36	0.83	0.46	0.28	100	0.04003	30
TG 20:0_34:1	Triacylglyceride 20:0_34:1	Triglycerides	0.56	0.8	0.27	4.4	0.41	0.83	0.42	0.78	93	0.07104	30
TG 20:1_24:3	Triacylglyceride 20:1_24:3	Triglycerides									0	0.102	30
TG 20:1_26:1	Triacylglyceride 20:1_26:1	Triglycerides	0.001	0.001	0.0009	0.0012	0.0009	0.0011	0.0001	0.0001	17	0.099	30
TG 20:1_30:1	Triacylglyceride 20:1_30:1	Triglycerides	0.12	0.18	0.057	0.61	0.083	0.21	0.13	0.16	33	0.1145	30
TG 20:1_31:0	Triacylglyceride 20:1_31:0	Triglycerides									0	0.099165	24
TG 20:1_32:0	Triacylglyceride 20:1_32:0	Triglycerides	0.087	0.097	0.048	0.14	0.06	0.14	0.079	0.041	83	0.33	6
TG 20:1_32:1	Triacylglyceride 20:1_32:1	Triglycerides	0.39	0.47	0.15	1.4	0.29	0.53	0.24	0.29	70	0.116	30
TG 20:1_32:2	Triacylglyceride 20:1_32:2	Triglycerides	0.34	0.34	0.14	0.62	0.24	0.43	0.18	0.13	100	0.145	30
TG 20:1_32:3	Triacylglyceride 20:1_32:3	Triglycerides	0.24	0.25	0.11	0.46	0.18	0.34	0.16	0.092	90	0.0827	30
TG 20:1_34:0	Triacylglyceride 20:1_34:0	Triglycerides	0.32	0.3	0.063	0.62	0.19	0.39	0.2	0.15	47	0.05495	30
TG 20:1_34:1	Triacylglyceride 20:1_34:1	Triglycerides	1.2	1.5	0.44	3.9	0.81	2	1.2	0.92	100	0.041	30
TG 20:1_34:2	Triacylglyceride 20:1_34:2	Triglycerides	1	1.3	0.58	2.9	0.75	1.7	0.95	0.65	100	0.106	30
TG 20:1_34:3	Triacylglyceride 20:1_34:3	Triglycerides	0.28	0.3	0.13	0.55	0.23	0.34	0.1	0.11	83	0.01616	30
TG 20:2_32:0	Triacylglyceride 20:2_32:0	Triglycerides	0.55	0.62	0.21	2.2	0.35	0.72	0.37	0.44	60	0.0419	30
TG 20:2_32:1	Triacylglyceride 20:2_32:1	Triglycerides	0.51	0.64	0.14	1.9	0.39	0.75	0.36	0.39	97	0.0726	30
TG 20:2_34:1	Triacylglyceride 20:2_34:1	Triglycerides	1.6	2	0.56	4.7	1	3.2	2.2	1.1	100	0.097	30
TG 20:2_34:2	Triacylglyceride 20:2_34:2	Triglycerides	1.5	1.7	0.48	3.8	1.2	2.3	1.1	0.81	100	0.0646	30
TG 20:2_34:3	Triacylglyceride 20:2_34:3	Triglycerides	0.37	0.42	0.13	0.91	0.31	0.53	0.22	0.17	100	0.0597	30
TG 20:2_34:4	Triacylglyceride 20:2_34:4	Triglycerides	0.058	0.056	0.016	0.083	0.045	0.073	0.028	0.018	57	0.069705	30
TG 20:2_36:5	Triacylglyceride 20:2_36:5	Triglycerides	0.12	0.11	0.048	0.2	0.095	0.13	0.036	0.035	60	0.045	30
TG 20:3_32:0	Triacylglyceride 20:3_32:0	Triglycerides	0.56	0.77	0.063	3.6	0.4	0.93	0.53	0.68	97	0.109	30
TG 20:3_32:1	Triacylglyceride 20:3_32:1	Triglycerides	0.7	0.89	0.15	3.1	0.46	1.2	0.74	0.64	100	0.032735	30
TG 20:3_32:2	Triacylglyceride 20:3_32:2	Triglycerides	0.39	0.45	0.067	1.2	0.31	0.58	0.28	0.23	90	0.207	30
TG 20:3_34:0	Triacylglyceride 20:3_34:0	Triglycerides	0.46	0.57	0.12	2	0.3	0.78	0.47	0.38	100	0.0939	30
TG 20:3_34:1	Triacylglyceride 20:3_34:1	Triglycerides	3.1	4	0.72	11	2.3	5.7	3.4	2.3	100	0.053755	30
TG 20:3_34:2	Triacylglyceride 20:3_34:2	Triglycerides	2.7	3.2	0.74	6.7	2.2	4.5	2.4	1.5	100	0.116	30
TG 20:3_34:3	Triacylglyceride 20:3_34:3	Triglycerides	0.6	0.69	0.22	1.3	0.47	0.93	0.45	0.31	100	0.062815	30
TG 20:3_36:3	Triacylglyceride 20:3_36:3	Triglycerides	1.6	1.8	0.7	3.7	1.4	2.1	0.7	0.69	100	0.0976	30
TG 20:3_36:4	Triacylglyceride 20:3_36:4	Triglycerides	0.92	0.94	0.4	1.8	0.7	1.1	0.44	0.33	100	0.0292	30
TG 20:3_36:5	Triacylglyceride 20:3_36:5	Triglycerides	0.39	0.41	0.15	0.85	0.27	0.53	0.26	0.17	100	0.209	30
TG 20:4_30:0	Triacylglyceride 20:4_30:0	Triglycerides	0.48	1	0.061	6.8	0.33	1.4	1.1	1.4	83	0.0695	30
TG 20:4_32:0	Triacylglyceride 20:4_32:0	Triglycerides	1.7	2.6	0.41	16	1	2.7	1.6	3.1	100	0.052835	30
TG 20:4_32:1	Triacylglyceride 20:4_32:1	Triglycerides	1.8	2.5	0.36	14	1.1	2.8	1.7	2.7	100	0.317	30
TG 20:4_32:2	Triacylglyceride 20:4_32:2	Triglycerides	0.77	1	0.24	4.1	0.49	1.5	1	0.8	97	0.02652	30
TG 20:4_33:2	Triacylglyceride 20:4_33:2	Triglycerides	0.26	0.31	0.098	1.2	0.21	0.35	0.14	0.21	90	2.4	30
TG 20:4_34:0	Triacylglyceride 20:4_34:0	Triglycerides	1.5	1.9	0.49	8.3	0.93	2.4	1.4	1.5	100	1.829	30
TG 20:4_34:1	Triacylglyceride 20:4_34:1	Triglycerides	11	13	4	44	7	18	11	8.7	100	0.638	30
TG 20:4_34:2	Triacylglyceride 20:4_34:2	Triglycerides	8.7	11	3	30	6.7	15	8	6.3	100	0.1358	30
TG 20:4_34:3	Triacylglyceride 20:4_34:3	Triglycerides	1.7	1.9	0.72	5.5	1.2	2.3	1.2	1	100	0.0528	30
TG 20:4_35:3	Triacylglyceride 20:4_35:3	Triglycerides	0.078	0.11	0.043	0.28	0.059	0.16	0.1	0.073	60	0.064385	30
TG 20:4_36:2	Triacylglyceride 20:4_36:2	Triglycerides	8.2	9	4.7	17	6.3	10	4.2	3.5	100	0.08757	30
TG 20:4_36:3	Triacylglyceride 20:4_36:3	Triglycerides	7.5	7.7	4.3	14	5.3	9.4	4.1	2.6	100	0.151	30
TG 20:4_36:4	Triacylglyceride 20:4_36:4	Triglycerides	3.9	3.8	1.7	8	2.2	4.7	2.5	1.5	100	0.179	30
TG 20:4_36:5	Triacylglyceride 20:4_36:5	Triglycerides	1	1.2	0.26	3.2	0.65	1.6	0.91	0.69	100	0.124	30
TG 20:5_34:0	Triacylglyceride 20:5_34:0	Triglycerides	0.43	0.65	0.12	2.8	0.31	0.77	0.46	0.58	100	0.117	30
TG 20:5_34:1	Triacylglyceride 20:5_34:1	Triglycerides	2.7	3.9	0.76	12	2	5.5	3.6	2.8	100	0.167	30
TG 20:5_34:2	Triacylglyceride 20:5_34:2	Triglycerides	2.3	3.2	0.64	9	1.7	3.7	2	2.2	100	0.02262	30
TG 20:5_36:2	Triacylglyceride 20:5_36:2	Triglycerides	1.9	2.8	0.42	14	1.2	3.3	2.1	2.7	100	0.018395	30
TG 20:5_36:3	Triacylglyceride 20:5_36:3	Triglycerides	2	2.9	0.73	12	1.4	3.4	2	2.5	97	0.0503929	30
TG 22:0_32:4	Triacylglyceride 22:0_32:4	Triglycerides	0.025	0.033	0.016	0.068	0.024	0.047	0.024	0.018	27	0.01739	30
TG 22:1_32:5	Triacylglyceride 22:1_32:5	Triglycerides	0.023	0.029	0.013	0.054	0.018	0.046	0.028	0.016	27	0.1105	30
TG 22:2_32:4	Triacylglyceride 22:2_32:4	Triglycerides	0.02	0.029	0.012	0.069	0.014	0.049	0.035	0.021	30	0.0876	30
TG 22:3_30:2	Triacylglyceride 22:3_30:2	Triglycerides	0.02	0.02	0.017	0.024				0.0047	6.7	0.791	30
TG 22:4_32:0	Triacylglyceride 22:4_32:0	Triglycerides	0.21	0.35	0.072	2	0.13	0.42	0.29	0.42	73	0.775	30
TG 22:4_32:2	Triacylglyceride 22:4_32:2	Triglycerides	0.13	0.18	0.073	0.55	0.085	0.23	0.14	0.13	90	0.168	30
TG 22:4_34:2	Triacylglyceride 22:4_34:2	Triglycerides	0.85	1.1	0.31	3	0.62	1.5	0.93	0.7	100	0.071	30
TG 22:5_32:0	Triacylglyceride 22:5_32:0	Triglycerides	0.58	0.79	0.23	3.4	0.44	0.97	0.53	0.63	90	0.099	30
TG 22:5_32:1	Triacylglyceride 22:5_32:1	Triglycerides	0.56	0.74	0.2	3	0.38	0.99	0.62	0.57	100	0.08105	30
TG 22:5_34:1	Triacylglyceride 22:5_34:1	Triglycerides	3.6	4.2	1.7	9.9	2.6	6.1	3.5	2.1	100	0.072975	30
TG 22:5_34:2	Triacylglyceride 22:5_34:2	Triglycerides	3.2	3.6	1.6	7.6	2.5	4.8	2.3	1.5	100	0.126	30
TG 22:5_34:3	Triacylglyceride 22:5_34:3	Triglycerides	0.59	0.68	0.22	1.7	0.48	0.83	0.35	0.32	100	0.03057	30
TG 22:6_32:0	Triacylglyceride 22:6_32:0	Triglycerides	1.2	1.4	0.33	6.9	0.64	1.7	1	1.2	100	0.025	30
TG 22:6_32:1	Triacylglyceride 22:6_32:1	Triglycerides	1.2	1.6	0.43	5.7	0.76	1.9	1.1	1.2	100	0.0639	30
TG 22:6_34:1	Triacylglyceride 22:6_34:1	Triglycerides	7	8.3	2.2	20	4.4	11	6.8	5.1	100	0.023	30
TG 22:6_34:2	Triacylglyceride 22:6_34:2	Triglycerides	6.2	7.3	1.6	16	4.3	11	6.4	4.1	100	0.061	30
TG 22:6_34:3	Triacylglyceride 22:6_34:3	Triglycerides	1.2	1.6	0.4	5	0.89	2.1	1.2	1.1	100	0.158	30
Hex3Cer d18:1/16:0	Trihexosylceramide d18:1/16:0	Trihexosylceramides	1.5	1.7	0.94	2.8	1.4	1.9	0.52	0.41	100	0.26	30
Hex3Cer d18:1/18:0	Trihexosylceramide d18:1/18:0	Trihexosylceramides	0.19	0.19	0.11	0.3	0.17	0.22	0.046	0.047	100	0.022	30
Hex3Cer d18:1/20:0	Trihexosylceramide d18:1/20:0	Trihexosylceramides	0.092	0.085	0.013	0.14	0.025	0.13	0.11	0.052	27	0.023	30
Hex3Cer d18:1/22:0	Trihexosylceramide d18:1/22:0	Trihexosylceramides	0.23	0.22	0.083	0.42	0.15	0.27	0.11	0.088	97	0.022	30
Hex3Cer d18:1/24:1	Trihexosylceramide d18:1/24:1	Trihexosylceramides	0.64	0.71	0.3	1.2	0.53	0.94	0.4	0.23	100	0.022	30
Hex3Cer d18:1/26:1	Trihexosylceramide d18:1/26:1	Trihexosylceramides	0.053	0.06	0.022	0.13	0.043	0.074	0.031	0.025	87	0.017	30
Choline	Choline	Vitamins and Cofactors	14	14	6.5	19	12	16	4.5	2.8	100	0.26	30
Disclaimer:
The reference ranges do not represent a diagnosis but serve as a means of comparison only. A reference range provides no statement about whether a person is sick or healthy.
Individuals with metabolite concentrations outside the range can therefore be healthy and individuals with metabolite concentrations in the reference range can be ill.

## Sheet: Black-female-60s
Quantitative metabolomics database (QMDB)
Selected matrix:	human plasma
Assay:	MxP® Quant 500
Age:	60 to 69
Gender:	f
Ethnicity:	Black or African American
Samples found matching the preferences	30
Short Name	Metabolite	Class	Median [µM]	Mean [µM]	Min [µM]	Max [µM]	1st quartile [µM]	3rd quartile [µM]	Interquartal range [µM]	Standard deviation	% of samples > LOD	Typical LOD [µM]	No of samples
C0	Carnitine	Acylcarnitines	47	47	23	75	38	56	18	13	100	1.5065	30
C2	Acetylcarnitine	Acylcarnitines	5.9	6.5	2.9	16	4.4	7.7	3.2	3	100	0.060515	30
C3	Propionylcarnitine	Acylcarnitines	0.41	0.44	0.11	0.94	0.31	0.53	0.22	0.17	100	0.098	30
C3-DC (C4-OH)	Malonylcarnitine (Hydroxybutyrylcarnitine)	Acylcarnitines	0.12	0.11	0.076	0.17	0.088	0.14	0.048	0.029	30	0.057	30
C3-OH	Hydroxypropionylcarnitine	Acylcarnitines			0.072	0.072					3.3	0.363	30
C3:1	Propenoylcarnitine	Acylcarnitines			0.03	0.03					3.3	0.0362	30
C4	Butyrylcarnitine	Acylcarnitines	0.21	0.22	0.083	0.47	0.17	0.27	0.11	0.08	93	0.0604	30
C4:1	Butenylcarnitine	Acylcarnitines									0	0.054	30
C5	Valerylcarnitine	Acylcarnitines	0.14	0.15	0.091	0.27	0.12	0.16	0.043	0.047	93	0.0504	30
C5-DC (C6-OH)	Glutarylcarnitine (Hydroxyhexanoylcarnitine)	Acylcarnitines									0	0.09628	30
C5-M-DC	Methylglutarylcarnitine	Acylcarnitines									0	0.06872	30
C5-OH (C3-DC-M)	Hydroxyvalerylcarnitine (Methylmalonylcarnitine)	Acylcarnitines	0.12	0.1	0.03	0.15	0.03			0.063	10	0.1	30
C5:1	Tiglylcarnitine	Acylcarnitines									0	0.04377	30
C5:1-DC	Glutaconylcarnitine	Acylcarnitines									0	0.0423541	30
C6 (C4:1-DC)	Hexanoylcarnitine (Fumarylcarnitine)	Acylcarnitines	0.14	0.14	0.12	0.16				0.028	6.7	0.153	30
C6:1	Hexenoylcarnitine	Acylcarnitines									0	0.09068	30
C7-DC	Pimelylcarnitine	Acylcarnitines			0.16	0.16					3.3	0.060255	30
C8	Octanoylcarnitine	Acylcarnitines	0.37	0.38	0.19	0.65	0.31	0.43	0.12	0.13	27	0.223	30
C9	Nonanoylcarnitine	Acylcarnitines	0.042	0.042	0.042	0.042				0.0005	6.7	0.028	30
C10	Decanoylcarnitine	Acylcarnitines	0.35	0.38	0.16	0.85	0.28	0.46	0.18	0.15	80	0.1295	30
C10:1	Decenoylcarnitine	Acylcarnitines									0	0.4035	30
C10:2	Decadienoylcarnitine	Acylcarnitines	0.11	0.11	0.068	0.15				0.061	6.7	0.1085	30
C12	Dodecanoylcarnitine	Acylcarnitines	0.16	0.14	0.081	0.17	0.11	0.16	0.056	0.033	30	0.072	30
C12-DC	Dodecanedioylcarnitine	Acylcarnitines									0	1.019	30
C12:1	Dodecenoylcarnitine	Acylcarnitines			0.12	0.12					3.3	0.109	30
C14	Tetradecanoylcarnitine	Acylcarnitines									0	0.0599	30
C14:1	Tetradecenoylcarnitine	Acylcarnitines	0.065	0.073	0.038	0.12	0.051	0.092	0.041	0.025	80	0.0349	30
C14:1-OH	Hydroxytetradecenoylcarnitine	Acylcarnitines									0	0.035385	30
C14:2	Tetradecadienoylcarnitine	Acylcarnitines	0.051	0.087	0.043	0.22	0.046	0.14	0.091	0.071	20	0.0322	30
C14:2-OH	Hydroxytetradecadienoylcarnitine	Acylcarnitines			0.024	0.024					3.3	0.031	30
C16	Hexadecanoylcarnitine	Acylcarnitines	0.12	0.13	0.095	0.16	0.11	0.14	0.029	0.02	20	0.088	30
C16-OH	Hydroxyhexadecanoylcarnitine	Acylcarnitines									0	0.077	30
C16:1	Hexadecenoylcarnitine	Acylcarnitines			0.053	0.053					3.3	0.05	30
C16:1-OH	Hydroxyhexadecenoylcarnitine	Acylcarnitines									0	0.039895	30
C16:2	Hexadecadienoylcarnitine	Acylcarnitines	0.024	0.024	0.02	0.028				0.0054	6.7	0.02942	30
C16:2-OH	Hydroxyhexadecadienoylcarnitine	Acylcarnitines									0	0.041045	30
C18	Octadecanoylcarnitine	Acylcarnitines	0.054	0.058	0.039	0.085	0.045	0.071	0.026	0.015	30	0.02201	30
C18:1	Octadecenoylcarnitine	Acylcarnitines	0.17	0.17	0.12	0.27	0.16	0.18	0.018	0.037	47	0.082855	30
C18:1-OH	Hydroxyoctadecenoylcarnitine	Acylcarnitines									0	0.0687	30
C18:2	Octadecadienoylcarnitine	Acylcarnitines	0.088	0.092	0.044	0.25	0.066	0.11	0.045	0.04	93	0.0347	30
Trigonelline	Trigonelline	Alkaloids	0.48	0.67	0.09	4.6	0.2	0.94	0.74	0.85	90	0.042595	30
TMAO	Trimethylamine N-oxide	Amine Oxides	6.2	11	2.4	52	3.8	16	13	13	100	0.108	30
1-Met-His	1-Methylhistidine	Amino Acid Related	6.6	7.6	2	16	5.2	9.2	4.1	3.3	100	0.01	30
3-Met-His	3-Methylhistidine	Amino Acid Related	13	15	0.26	47	2.8	20	18	13	100	0.01	30
5-AVA	5-Aminovaleric acid	Amino Acid Related	0.055	0.075	0.04	0.31	0.045	0.068	0.023	0.066	50	0.04	30
AABA	alpha-Aminobutyric acid	Amino Acid Related	22	22	8.7	36	17	27	9.1	6.5	100	0.435	30
Ac-Orn	Acetylornithine	Amino Acid Related									0	0.065	30
ADMA	Asymmetric dimethylarginine	Amino Acid Related	0.58	0.58	0.41	0.84	0.51	0.63	0.12	0.1	100	0.08	30
alpha-AAA	alpha-Aminoadipic acid	Amino Acid Related	0.89	0.98	0.44	1.7	0.71	1.3	0.55	0.35	100	0.3	30
Anserine	L-Anserine	Amino Acid Related	0.025	0.025	0.025	0.026				0.0012	6.7	0.01	30
BABA	beta-Aminobutyric acid	Amino Acid Related	0.075	0.073	0.04	0.1	0.049	0.096	0.048	0.026	13	0.03	30
Betaine	Betaine	Amino Acid Related	31	33	17	60	24	39	15	11	100	0.2	30
c4-OH-Pro	cis-4-Hydroxyproline	Amino Acid Related									0	0.3	30
Carnosine	Carnosine	Amino Acid Related									0	0.2	30
Cit	Citrulline	Amino Acid Related	38	41	19	79	32	50	18	14	100	1	30
Creatinine	Creatinine	Amino Acid Related	83	87	52	150	70	97	26	24	100	3.85	30
Cystine	Cystine	Amino Acid Related	56	58	31	115	48	67	19	17	100	0.07489	30
DOPA	Dihydroxyphenylalanine	Amino Acid Related									0	0.148	30
HArg	Homoarginine	Amino Acid Related	3.4	3.6	1.5	7.4	2.9	3.9	1	1.4	100	0.01	30
HCys	Homocysteine	Amino Acid Related	7.2	7.1	4.1	13	5.1	8.7	3.5	2.2	100	0.266	30
Kynurenine	Kynurenine	Amino Acid Related	2.1	2.1	1.2	3.6	1.7	2.4	0.73	0.57	100	0.2265	30
Met-SO	Methionine-Sulfoxide	Amino Acid Related	0.72	0.71	0.38	1.4	0.49	0.82	0.33	0.25	100	0.1	30
Nitro-Tyr	Nitrotyrosine	Amino Acid Related									0	0.3	30
Orn	Ornithine	Amino Acid Related	101	107	69	161	81	139	59	31	100	1	30
PAG	Phenylacetylglycine	Amino Acid Related									0	0.01	30
PheAlaBetaine	Phenylalanine betaine	Amino Acid Related	0.012	0.013	0.01	0.019	0.011	0.015	0.0034	0.0033	20	0.01	30
ProBetaine	Proline betaine	Amino Acid Related	7.2	12	0.56	69	2.1	18	16	14	100	0.061	30
Sarcosine	Sarcosine	Amino Acid Related	4.4	4.6	2.7	7.4	3.7	5.4	1.6	1.1	100	0.1855	30
SDMA	Symmetric dimethylarginine	Amino Acid Related	0.61	0.6	0.36	0.93	0.47	0.67	0.2	0.15	100	0.02	30
t4-OH-Pro	trans-4-Hydroxyproline	Amino Acid Related	13	17	5.2	65	9.3	22	12	12	100	0.382	30
Taurine	Taurine	Amino Acid Related	71	73	43	139	54	84	30	23	100	0.363	30
TrpBetaine	Tryptophan betaine	Amino Acid Related	0.36	0.58	0.029	2	0.17	0.96	0.79	0.58	100	0.00811	30
Ala	Alanine	Amino Acids	447	469	230	1003	356	557	202	149	100	2.4075	30
Arg	Arginine	Amino Acids	83	85	42	127	67	104	38	21	100	0.987	30
Asn	Asparagine	Amino Acids	52	56	36	104	48	61	13	14	100	0.5225	30
Asp	Aspartic Acid	Amino Acids	7.8	8.3	4.8	15	6.7	9.3	2.6	2.4	100	1.0305	30
Cys	Cysteine	Amino Acids	82	86	47	133	73	98	25	20	100	0.1	30
Gln	Glutamine	Amino Acids	710	719	505	1129	642	776	134	126	100	3.45	30
Glu	Glutamic Acid	Amino Acids	63	66	16	125	50	83	34	26	100	2.662	30
Gly	Glycine	Amino Acids	340	342	200	588	279	392	113	89	100	4.7	30
His	Histidine	Amino Acids	93	95	71	132	82	107	25	16	100	1.1	30
Ile	Isoleucine	Amino Acids	80	82	53	132	71	92	21	17	100	0.759	30
Leu	Leucine	Amino Acids	141	142	94	213	126	154	28	26	100	1.095	30
Lys	Lysine	Amino Acids	215	215	137	290	192	249	57	42	100	1.4	30
Met	Methionine	Amino Acids	30	31	18	52	27	33	6.2	7	100	0.8055	30
Phe	Phenylalanine	Amino Acids	67	67	45	98	63	73	11	10	100	0.8685	30
Pro	Proline	Amino Acids	195	202	116	398	159	234	75	60	100	2.07	30
Ser	Serine	Amino Acids	116	122	53	178	105	142	37	28	100	1.55	30
Thr	Threonine	Amino Acids	156	161	90	269	130	184	55	42	100	0.9225	30
Trp	Tryptophan	Amino Acids	62	63	43	93	56	71	15	10	100	0.792	30
Tyr	Tyrosine	Amino Acids	81	83	52	178	69	89	20	23	100	0.4925	30
Val	Valine	Amino Acids	246	247	156	383	210	281	71	47	100	1.048	30
CA	Cholic Acid	Bile Acids	0.034	0.36	0.011	7.1	0.025	0.058	0.033	1.3	97	0.003	30
CDCA	Chenodeoxycholic acid	Bile Acids	0.11	0.35	0.029	2.1	0.062	0.4	0.34	0.52	60	0.02	30
DCA	Deoxycholic acid	Bile Acids	0.39	0.51	0.086	1.7	0.21	0.63	0.42	0.45	100	0.0081	30
GCA	Glycocholic acid	Bile Acids	0.24	0.31	0.021	1.5	0.085	0.39	0.31	0.33	100	0.00429	30
GCDCA	Glycochenodeoxycholic acid	Bile Acids	0.42	0.6	0.044	2	0.11	1	0.93	0.57	100	0.002	30
GDCA	Glycodeoxycholic acid	Bile Acids	0.34	0.59	0.016	2.6	0.11	0.79	0.68	0.7	100	0.0016736	30
GLCA	Glycolithocholic acid	Bile Acids	0.018	0.02	0.0052	0.056	0.008	0.029	0.021	0.014	70	0.003565	30
GLCAS	Glycolithocholic acid sulfate	Bile Acids	0.31	0.36	0.071	1	0.21	0.48	0.27	0.24	100	0.0034	30
GUDCA	Glycoursodeoxycholic acid	Bile Acids	0.056	0.094	0.0046	0.47	0.016	0.11	0.095	0.11	97	0.0019	30
TCA	Taurocholic acid	Bile Acids	0.041	0.063	0.0069	0.22	0.021	0.087	0.066	0.058	97	0.005	30
TCDCA	Taurochenodeoxycholic acid	Bile Acids	0.074	0.13	0.0088	0.47	0.045	0.22	0.18	0.12	100	0.004085	30
TDCA	Taurodeoxycholic acid	Bile Acids	0.082	0.13	0.0041	0.66	0.022	0.16	0.14	0.15	100	0.004	30
TLCA	Taurolithocholic acid	Bile Acids	0.0062	0.0063	0.0025	0.012	0.0034	0.0089	0.0055	0.003	40	0.002	30
TMCA	Tauro-muricholic acids	Bile Acids	0.016	0.023	0.0029	0.1	0.0062	0.035	0.029	0.023	80	0.002	30
beta-Ala	beta-Alanine	Biogenic Amines	2.9	3	1.1	5.3	2.1	3.7	1.6	1	100	0.11	30
Dopamine	Dopamine	Biogenic Amines									0	0.2315	30
GABA	gamma-Aminobutyric acid	Biogenic Amines	0.2	0.2	0.12	0.33	0.17	0.22	0.051	0.045	100	0.04652	30
Histamine	Histamine	Biogenic Amines									0	0.429	30
PEA	Phenylethylamine	Biogenic Amines									0	0.001	30
Putrescine	Putrescine	Biogenic Amines	0.12	0.13	0.07	0.24	0.098	0.16	0.061	0.049	83	0.0624	30
Serotonin	Serotonin	Biogenic Amines	0.15	0.18	0.066	0.64	0.086	0.22	0.13	0.13	70	0.04	30
Spermidine	Spermidine	Biogenic Amines	0.27	0.27	0.23	0.3				0.051	6.7	0.2	30
Spermine	Spermine	Biogenic Amines	0.23	0.23	0.22	0.23	0.22	0.23	0.016	0.0087	13	0.2	30
Hexose	Hexose	Carbohydrates and Related	5517	5841	3557	11066	4946	6327	1381	1675	100	88.1885	30
AconAcid	Aconitic acid	Carboxylic Acids	11	13	6.8	26	9.7	16	6.2	5.3	100	0.2667	30
DiCA(12:0)	Dodecanedioic acid	Carboxylic Acids									0	0.1595	30
DiCA(14:0)	Tetradecanedioic acid	Carboxylic Acids	0.092	0.092	0.084	0.1				0.011	6.7	0.09969	30
HipAcid	Hippuric acid	Carboxylic Acids	6.1	7.3	0.78	27	4	11	7.3	5.4	100	0.5	30
Lac	Lactic acid	Carboxylic Acids	3697	4187	2044	7383	2851	5312	2461	1631	100	143.401	30
OH-GlutAcid	Hydroxyglutaric acid	Carboxylic Acids									0	6.942	30
Suc	Succinic acid	Carboxylic Acids									0	20.851	30
Cer d16:1/18:0	Ceramide d16:1/18:0	Ceramides	0.13	0.14	0.087	0.23	0.1	0.17	0.07	0.043	70	0.025875	30
Cer d16:1/20:0	Ceramide d16:1/20:0	Ceramides	0.12	0.12	0.056	0.19	0.1	0.15	0.048	0.034	100	0.01891	30
Cer d16:1/22:0	Ceramide d16:1/22:0	Ceramides	0.38	0.41	0.15	0.68	0.32	0.5	0.18	0.11	100	0.0694	30
Cer d16:1/23:0	Ceramide d16:1/23:0	Ceramides	0.19	0.21	0.098	0.4	0.14	0.27	0.12	0.073	100	0.033	30
Cer d16:1/24:0	Ceramide d16:1/24:0	Ceramides	0.28	0.29	0.14	0.57	0.23	0.34	0.11	0.087	100	0.01336	30
Cer d18:1/14:0	Ceramide d18:1/14:0	Ceramides	0.086	0.089	0.071	0.11	0.076	0.1	0.028	0.014	53	0.04241	30
Cer d18:1/16:0	Ceramide d18:1/16:0	Ceramides	0.51	0.52	0.29	0.86	0.45	0.57	0.12	0.1	100	0.011415	30
Cer d18:1/18:0	Ceramide d18:1/18:0	Ceramides	0.21	0.22	0.098	0.38	0.17	0.26	0.088	0.072	100	0.00978	30
Cer d18:1/18:0-OH	Ceramide d18:1/18:0-OH	Ceramides	0.36	0.41	0.23	0.7	0.24	0.6	0.36	0.2	17	0.2945	30
Cer d18:1/18:1	Ceramide d18:1/18:1	Ceramides	0.03	0.031	0.026	0.041	0.027	0.036	0.0088	0.0056	17	0.0271351	30
Cer d18:1/20:0	Ceramide d18:1/20:0	Ceramides	0.16	0.17	0.095	0.35	0.13	0.19	0.067	0.061	100	0.007175	30
Cer d18:1/20:0-OH	Ceramide d18:1/20:0-OH	Ceramides	0.62	0.67	0.47	0.95	0.59	0.76	0.17	0.15	47	0.239	30
Cer d18:1/22:0	Ceramide d18:1/22:0	Ceramides	1	1	0.6	1.5	0.81	1.3	0.47	0.26	100	0.010545	30
Cer d18:1/23:0	Ceramide d18:1/23:0	Ceramides	1.2	1.2	0.59	2	1	1.5	0.47	0.35	100	0.012515	30
Cer d18:1/24:0	Ceramide d18:1/24:0	Ceramides	2.8	3	1.8	5.1	2.5	3.5	1	0.74	100	0.02399	30
Cer d18:1/24:1	Ceramide d18:1/24:1	Ceramides	1.2	1.3	0.67	2.2	0.98	1.6	0.6	0.36	100	0.011975	30
Cer d18:1/25:0	Ceramide d18:1/25:0	Ceramides	0.58	0.58	0.24	1	0.51	0.69	0.19	0.16	100	0.066815	30
Cer d18:1/26:0	Ceramide d18:1/26:0	Ceramides	0.11	0.12	0.05	0.23	0.091	0.14	0.053	0.043	100	0.024	30
Cer d18:1/26:1	Ceramide d18:1/26:1	Ceramides	0.034	0.036	0.021	0.071	0.029	0.04	0.011	0.01	97	0.0119	30
Cer d18:2/14:0	Ceramide d18:2/14:0	Ceramides	0.013	0.014	0.0089	0.021	0.0091	0.02	0.011	0.0056	20	0.01116	30
Cer d18:2/16:0	Ceramide d18:2/16:0	Ceramides	0.12	0.13	0.085	0.21	0.11	0.14	0.025	0.028	100	0.049	30
Cer d18:2/18:0	Ceramide d18:2/18:0	Ceramides	0.11	0.11	0.061	0.17	0.097	0.13	0.037	0.027	100	0.029	30
Cer d18:2/18:1	Ceramide d18:2/18:1	Ceramides	0.018	0.022	0.011	0.038	0.014	0.033	0.02	0.01	27	0.01462	30
Cer d18:2/20:0	Ceramide d18:2/20:0	Ceramides	0.09	0.093	0.043	0.17	0.072	0.12	0.047	0.029	100	0.025	30
Cer d18:2/22:0	Ceramide d18:2/22:0	Ceramides	0.37	0.35	0.21	0.48	0.29	0.4	0.11	0.07	100	0.011245	30
Cer d18:2/23:0	Ceramide d18:2/23:0	Ceramides	0.18	0.18	0.083	0.29	0.13	0.21	0.077	0.052	100	0.041	30
Cer d18:2/24:0	Ceramide d18:2/24:0	Ceramides	0.66	0.65	0.39	1	0.56	0.76	0.2	0.15	100	0.00689	30
Cer d18:2/24:1	Ceramide d18:2/24:1	Ceramides	0.28	0.28	0.17	0.4	0.22	0.33	0.12	0.064	100	0.005	30
CE 14:0	Cholesteryl ester 14:0	Cholesteryl Esters	14	15	4.3	32	10	18	7.8	6.5	100	0.3075	30
CE 14:1	Cholesteryl ester 14:1	Cholesteryl Esters	0.17	0.19	0.092	0.33	0.12	0.25	0.13	0.085	20	0.144	30
CE 15:0	Cholesteryl ester 15:0	Cholesteryl Esters	5.2	5.6	2.5	9.5	4.6	6.5	1.9	1.7	100	1.39	30
CE 15:1	Cholesteryl ester 15:1	Cholesteryl Esters	0.7	0.7	0.59	0.8				0.14	6.7	0.507	30
CE 16:0	Cholesteryl ester 16:0	Cholesteryl Esters	197	198	105	282	173	225	52	43	100	0.938	30
CE 16:1	Cholesteryl ester 16:1	Cholesteryl Esters	36	47	12	187	27	59	32	33	100	9.92	30
CE 17:0	Cholesteryl ester 17:0	Cholesteryl Esters	5.4	5.3	2.8	8.2	4.5	6.1	1.6	1.2	100	1.25	30
CE 17:1	Cholesteryl ester 17:1	Cholesteryl Esters	2.8	3	1.2	5.7	2.2	3.6	1.4	1.1	100	1.06	30
CE 18:0	Cholesteryl ester 18:0	Cholesteryl Esters	13	13	6.4	24	11	16	4.8	3.7	100	0.29215	30
CE 18:1	Cholesteryl ester 18:1	Cholesteryl Esters	254	267	146	706	201	295	93	104	100	1.3125	30
CE 18:2	Cholesteryl ester 18:2	Cholesteryl Esters	1318	1360	706	2186	1181	1530	349	298	100	14.28	30
CE 18:3	Cholesteryl ester 18:3	Cholesteryl Esters	54	63	29	149	41	86	44	27	100	0.226	30
CE 20:0	Cholesteryl ester 20:0	Cholesteryl Esters	16	19	1.6	44	2.4	39	37	20	13	4.413	30
CE 20:1	Cholesteryl ester 20:1	Cholesteryl Esters	0.81	2.1	0.56	6	0.59	3.5	2.9	2.1	23	0.618	30
CE 20:3	Cholesteryl ester 20:3	Cholesteryl Esters	21	22	11	47	16	27	11	8.5	100	0.183	30
CE 20:4	Cholesteryl ester 20:4	Cholesteryl Esters	291	289	147	446	225	339	114	77	100	0.549	30
CE 20:5	Cholesteryl ester 20:5	Cholesteryl Esters	64	79	32	351	50	90	41	59	100	0.4255	30
CE 22:0	Cholesteryl ester 22:0	Cholesteryl Esters	0.16	0.16	0.12	0.2	0.13	0.2	0.067	0.035	13	0.108	30
CE 22:1	Cholesteryl ester 22:1	Cholesteryl Esters	0.12	0.11	0.074	0.14	0.093	0.13	0.039	0.024	17	0.147	30
CE 22:2	Cholesteryl ester 22:2	Cholesteryl Esters	0.42	0.51	0.1	1.1	0.14	0.93	0.78	0.41	20	0.169	30
CE 22:5	Cholesteryl ester 22:5	Cholesteryl Esters	2.6	2.7	1.2	4.1	2.2	3.3	1.1	0.78	100	0.88	30
CE 22:6	Cholesteryl ester 22:6	Cholesteryl Esters	54	53	28	90	35	67	32	18	100	0.3	30
p-Cresol-SO4	p-Cresol sulfate	Cresols	49	49	3	97	34	65	31	23	100	0.01	30
DG 14:0_14:0	Diacylglyceride 14:0_14:0	Diglycerides									0	0.3475	30
DG 14:0_18:1	Diacylglyceride 14:0_18:1	Diglycerides	0.98	0.98	0.93	1				0.067	6.7	0.6975	30
DG 14:0_18:2	Diacylglyceride 14:0_18:2	Diglycerides	0.86	0.73	0.45	0.87	0.45			0.24	10	0.334	30
DG 14:0_20:0	Diacylglyceride 14:0_20:0	Diglycerides									0	0.0698	30
DG 14:1_18:1	Diacylglyceride 14:1_18:1	Diglycerides	0.15	0.16	0.089	0.24	0.092	0.23	0.14	0.074	13	0.09721	30
DG 14:1_20:2	Diacylglyceride 14:1_20:2	Diglycerides									0	0.1135	30
DG 16:0_16:0	Diacylglyceride 16:0_16:0	Diglycerides									0	23.3	30
DG 16:0_16:1	Diacylglyceride 16:0_16:1	Diglycerides	0.41	0.49	0.32	0.86	0.32	0.7	0.38	0.22	20	0.2565	30
DG 16:0_18:1	Diacylglyceride 16:0_18:1	Diglycerides	2.1	2.4	0.83	7.7	1.3	3	1.7	1.5	90	0.573	30
DG 16:0_18:2	Diacylglyceride 16:0_18:2	Diglycerides	1.4	1.7	0.67	5	0.96	2.2	1.3	1.1	100	0.48	30
DG 16:0_20:0	Diacylglyceride 16:0_20:0	Diglycerides									0	0.9455	30
DG 16:0_20:3	Diacylglyceride 16:0_20:3	Diglycerides			0.11	0.11					3.3	0.1155	30
DG 16:0_20:4	Diacylglyceride 16:0_20:4	Diglycerides									0	0.189	30
DG 16:1_18:0	Diacylglyceride 16:1_18:0	Diglycerides	0.22	0.2	0.04	0.31	0.075	0.29	0.22	0.12	13	0.125	30
DG 16:1_18:1	Diacylglyceride 16:1_18:1	Diglycerides	1.8	2	0.79	3.9	1.3	3	1.7	0.94	50	0.4415	30
DG 16:1_18:2	Diacylglyceride 16:1_18:2	Diglycerides	0.58	0.64	0.25	2.2	0.36	0.7	0.34	0.42	93	0.151	30
DG 16:1_20:0	Diacylglyceride 16:1_20:0	Diglycerides									0	0.234	30
DG 17:0_17:1	Diacylglyceride 17:0_17:1	Diglycerides									0	0.107	30
DG 17:0_18:1	Diacylglyceride 17:0_18:1	Diglycerides	0.5	0.54	0.3	1.1	0.41	0.6	0.19	0.18	93	0.188	30
DG 18:0_20:0	Diacylglyceride 18:0_20:0	Diglycerides									0	0.417	30
DG 18:0_20:4	Diacylglyceride 18:0_20:4	Diglycerides			0.065	0.065					3.3	0.1225	30
DG 18:1_18:1	Diacylglyceride 18:1_18:1	Diglycerides	1.9	2.3	0.88	9.3	1.4	2.8	1.4	1.7	97	0.516	30
DG 18:1_18:2	Diacylglyceride 18:1_18:2	Diglycerides	6	7.2	2.1	22	4.5	7.9	3.5	4.6	100	1.63	30
DG 18:1_18:3	Diacylglyceride 18:1_18:3	Diglycerides	1.1	1.1	0.56	1.8	0.89	1.2	0.31	0.37	23	0.339	30
DG 18:1_18:4	Diacylglyceride 18:1_18:4	Diglycerides									0	0.17015	30
DG 18:1_20:0	Diacylglyceride 18:1_20:0	Diglycerides	0.37	0.61	0.28	1.8	0.28	0.88	0.59	0.58	20	0.271	30
DG 18:1_20:1	Diacylglyceride 18:1_20:1	Diglycerides	0.021	0.021	0.014	0.029	0.016	0.027	0.011	0.0059	20	0.0322042	30
DG 18:1_20:2	Diacylglyceride 18:1_20:2	Diglycerides	0.26	0.26	0.18	0.35	0.19	0.34	0.15	0.079	13	0.119	30
DG 18:1_20:3	Diacylglyceride 18:1_20:3	Diglycerides	0.14	0.15	0.057	0.28	0.066	0.24	0.18	0.09	20	0.07755	30
DG 18:1_20:4	Diacylglyceride 18:1_20:4	Diglycerides	0.43	0.39	0.13	0.54	0.27	0.49	0.22	0.15	17	0.185	30
DG 18:1_22:5	Diacylglyceride 18:1_22:5	Diglycerides			0.015	0.015					3.3	0.0133982	30
DG 18:1_22:6	Diacylglyceride 18:1_22:6	Diglycerides			2.6	2.6					3.3	0.29595	30
DG 18:2_18:2	Diacylglyceride 18:2_18:2	Diglycerides	4.2	5.3	1.8	16	2.9	6.9	4	3.6	100	0.605	30
DG 18:2_18:3	Diacylglyceride 18:2_18:3	Diglycerides	0.47	0.5	0.24	1.2	0.33	0.65	0.32	0.22	83	0.152	30
DG 18:2_18:4	Diacylglyceride 18:2_18:4	Diglycerides	0.1	0.096	0.057	0.12	0.076	0.11	0.037	0.023	17	0.1419	30
DG 18:2_20:0	Diacylglyceride 18:2_20:0	Diglycerides	0.14	0.18	0.1	0.44	0.11	0.22	0.12	0.12	23	0.122	30
DG 18:2_20:4	Diacylglyceride 18:2_20:4	Diglycerides	0.34	0.38	0.17	0.65	0.2	0.58	0.38	0.2	17	0.1805	30
DG 18:3_18:3	Diacylglyceride 18:3_18:3	Diglycerides									0	0.1605	30
DG 18:3_20:2	Diacylglyceride 18:3_20:2	Diglycerides									0	0.176	30
DG 21:0_22:6	Diacylglyceride 21:0_22:6	Diglycerides			0.32	0.32					3.3	0.407	30
DG 22:1_22:2	Diacylglyceride 22:1_22:2	Diglycerides	0.36	0.36	0.35	0.36				0.0071	6.7	0.1235	30
DG O-14:0_18:2	Diacylglyceride O-14:0_18:2	Diglycerides									0	0.804	30
DG O-16:0_18:1	Diacylglyceride O-16:0_18:1	Diglycerides									0	0.1255	30
DG O-16:0_20:4	Diacylglyceride O-16:0_20:4	Diglycerides									0	0.0461062	30
Hex2Cer d18:1/14:0	Dihexosylceramide d18:1/14:0	Dihexosylceramides	0.27	0.27	0.12	0.39	0.21	0.32	0.11	0.076	100	0.0829	30
Hex2Cer d18:1/16:0	Dihexosylceramide d18:1/16:0	Dihexosylceramides	2.9	3	1.2	5.1	2.5	3.5	0.92	0.8	100	0.0259557	30
Hex2Cer d18:1/18:0	Dihexosylceramide d18:1/18:0	Dihexosylceramides	0.28	0.27	0.14	0.42	0.23	0.31	0.075	0.06	100	0.01082	30
Hex2Cer d18:1/20:0	Dihexosylceramide d18:1/20:0	Dihexosylceramides	0.14	0.15	0.092	0.28	0.12	0.17	0.052	0.042	100	0.0339	30
Hex2Cer d18:1/22:0	Dihexosylceramide d18:1/22:0	Dihexosylceramides	0.28	0.31	0.16	0.47	0.26	0.39	0.14	0.084	100	0.105	30
Hex2Cer d18:1/24:0	Dihexosylceramide d18:1/24:0	Dihexosylceramides	0.25	0.26	0.11	0.49	0.2	0.32	0.12	0.087	100	0.077	30
Hex2Cer d18:1/24:1	Dihexosylceramide d18:1/24:1	Dihexosylceramides	0.43	0.44	0.13	0.74	0.35	0.51	0.17	0.12	100	0.133	30
Hex2Cer d18:1/26:0	Dihexosylceramide d18:1/26:0	Dihexosylceramides	0.012	0.013	0.0063	0.02	0.0083	0.018	0.0093	0.0051	17	0.003615	30
Hex2Cer d18:1/26:1	Dihexosylceramide d18:1/26:1	Dihexosylceramides	0.016	0.015	0.006	0.023	0.0087	0.02	0.011	0.0061	27	0.006	30
Cer d18:0/18:0	Dihydroceramide d18:0/18:0	Dihydroceramides	0.029	0.029	0.017	0.042	0.018	0.041	0.023	0.013	13	0.00583	30
Cer d18:0/18:0-OH	Dihydroceramide d18:0/18:0-OH	Dihydroceramides			0.55	0.55					3.3	0.606	30
Cer d18:0/20:0	Dihydroceramide d18:0/20:0	Dihydroceramides			0.057	0.057					3.3	0.03455	30
Cer d18:0/22:0	Dihydroceramide d18:0/22:0	Dihydroceramides	0.25	0.27	0.17	0.38	0.22	0.35	0.13	0.072	30	0.07019	30
Cer d18:0/24:0	Dihydroceramide d18:0/24:0	Dihydroceramides	0.38	0.38	0.26	0.69	0.3	0.41	0.11	0.094	100	0.097	30
Cer d18:0/24:1	Dihydroceramide d18:0/24:1	Dihydroceramides	0.31	0.31	0.15	0.49	0.22	0.38	0.16	0.092	100	0.093	30
Cer d18:0/26:1	Dihydroceramide d18:0/26:1	Dihydroceramides									0	0.035385	30
Cer d18:0/26:1-OH	Dihydroceramide d18:0/26:1-OH	Dihydroceramides									0	0.402	30
FA 12:0	Dodecanoic acid	Fatty Acids									0	16.493	30
FA 14:0	Myristic acid	Fatty Acids									0	228.567	30
FA 16:0	Palmitic acid	Fatty Acids									0	738.192	30
FA 18:0	Stearic acid	Fatty Acids									0	690.389	30
FA 18:1	Octadecenoic acid	Fatty Acids	188	197	79	424	131	241	110	89	100	64	30
FA 18:2	Octadecadienoic acid	Fatty Acids	55	57	17	146	34	74	40	31	100	3.4155	30
FA 20:1	Eicosenoic acid	Fatty Acids	2	2.3	0.83	4.8	1.5	3.3	1.8	1.1	90	0.515	30
FA 20:2	Eicosadienoic acid	Fatty Acids	1.6	1.9	0.37	5.2	1.3	2.6	1.3	1.1	90	0.6955	30
FA 20:3	Eicosatrienoic acid	Fatty Acids	0.88	0.92	0.34	2.3	0.49	1.2	0.71	0.5	87	0.25	30
FA 20:4	Arachidonic acid	Fatty Acids	5.3	5.7	2.2	12	4.1	6.8	2.7	2.3	60	0.8	30
FA 20:5	Eicosapentaenoic acid	Fatty Acids	0.58	0.69	0.28	2	0.45	0.7	0.25	0.42	97	0.117	30
FA 22:6	Docosahexaenoic acid	Fatty Acids	8.2	8.3	1.2	18	5.2	10	5.2	3.9	100	1.681	30
Hex-Cer d16:1/22:0	Hexosylceramide d16:1/22:0	Hexosylceramides	0.046	0.052	0.026	0.1	0.04	0.059	0.019	0.021	97	0.0123	30
Hex-Cer d16:1/24:0	Hexosylceramide d16:1/24:0	Hexosylceramides	0.039	0.043	0.026	0.075	0.034	0.047	0.013	0.012	90	0.017	30
Hex-Cer d18:1/14:0	Hexosylceramide d18:1/14:0	Hexosylceramides	0.032	0.035	0.019	0.056	0.024	0.046	0.022	0.013	20	0.0148	30
Hex-Cer d18:1/16:0	Hexosylceramide d18:1/16:0	Hexosylceramides	1.2	1.3	0.72	2.2	1.1	1.4	0.26	0.29	100	0.02585	30
Hex-Cer d18:1/18:0	Hexosylceramide d18:1/18:0	Hexosylceramides	0.22	0.22	0.13	0.32	0.19	0.27	0.079	0.045	100	0.0198	30
Hex-Cer d18:1/18:1	Hexosylceramide d18:1/18:1	Hexosylceramides	0.12	0.12	0.047	0.18	0.11	0.14	0.028	0.028	100	0.0707	30
Hex-Cer d18:1/20:0	Hexosylceramide d18:1/20:0	Hexosylceramides	0.3	0.31	0.18	0.52	0.25	0.38	0.13	0.079	100	0.0319	30
Hex-Cer d18:1/22:0	Hexosylceramide d18:1/22:0	Hexosylceramides	3.3	3.3	1.8	4.8	2.9	3.7	0.78	0.68	100	0.103	30
Hex-Cer d18:1/23:0	Hexosylceramide d18:1/23:0	Hexosylceramides	1.7	1.7	1.1	3	1.4	2	0.59	0.39	100	0.03776	30
Hex-Cer d18:1/24:0	Hexosylceramide d18:1/24:0	Hexosylceramides	1.8	1.8	0.89	2.6	1.6	2	0.43	0.35	100	0.03923	30
Hex-Cer d18:1/24:1	Hexosylceramide d18:1/24:1	Hexosylceramides	4.2	4.3	2.3	7.2	3.6	4.9	1.3	1	100	0.023905	30
Hex-Cer d18:1/26:0	Hexosylceramide d18:1/26:0	Hexosylceramides	0.1	0.11	0.056	0.15	0.096	0.13	0.03	0.025	67	0.1495	30
Hex-Cer d18:1/26:1	Hexosylceramide d18:1/26:1	Hexosylceramides	0.11	0.11	0.067	0.14	0.093	0.12	0.029	0.022	37	0.03788	30
Hex-Cer d18:2/16:0	Hexosylceramide d18:2/16:0	Hexosylceramides	0.015	0.015	0.012	0.02	0.013	0.017	0.0038	0.0028	20	0.050635	30
Hex-Cer d18:2/18:0	Hexosylceramide d18:2/18:0	Hexosylceramides	0.04	0.041	0.021	0.065	0.032	0.05	0.018	0.013	100	0.009915	30
Hex-Cer d18:2/20:0	Hexosylceramide d18:2/20:0	Hexosylceramides	0.022	0.023	0.016	0.035	0.018	0.029	0.011	0.0068	20	0.01368	30
Hex-Cer d18:2/22:0	Hexosylceramide d18:2/22:0	Hexosylceramides	0.67	0.72	0.43	1.3	0.57	0.89	0.32	0.2	100	0.014665	30
Hex-Cer d18:2/23:0	Hexosylceramide d18:2/23:0	Hexosylceramides	0.38	0.39	0.14	0.72	0.29	0.45	0.16	0.13	100	0.176	30
Hex-Cer d18:2/24:0	Hexosylceramide d18:2/24:0	Hexosylceramides	0.94	0.94	0.57	1.4	0.81	1.1	0.25	0.2	100	0.0856	30
AbsAcid	Abscisic acid	Hormones and Related									0	0.333	30
Cortisol	Cortisol	Hormones and Related	0.31	0.35	0.19	0.69	0.27	0.41	0.14	0.12	97	0.01	30
Cortisone	Cortisone	Hormones and Related	0.094	0.098	0.081	0.14	0.084	0.11	0.026	0.018	37	0.05813	30
DHEAS	Dehydroepiandrosterone sulfate	Hormones and Related	1.1	1.3	0.36	5.4	0.74	1.6	0.85	0.98	97	0.06498	30
3-IAA	Indoleacetic acid	Indoles and Derivatives	2.1	2.4	0.75	5.9	1.5	2.8	1.3	1.1	100	0.0851258	30
3-IPA	Indolepropionic acid	Indoles and Derivatives	0.68	0.97	0.025	2.8	0.44	1.5	1	0.71	100	0.018	30
Indole	Indole	Indoles and Derivatives									0	0.0110957	30
Ind-SO4	Indoxyl sulfate	Indoles and Derivatives	7.8	9	1.9	20	5	14	8.6	5.2	100	0.0625	30
LPC 14:0	Lysophosphatidylcholine 14:0	Lysophosphatidylcholines			7.1	7.1					3.3	78	30
LPC 16:0	Lysophosphatidylcholine 16:0	Lysophosphatidylcholines	102	104	46	164	84	121	36	28	100	12.1905	30
LPC 16:1	Lysophosphatidylcholine 16:1	Lysophosphatidylcholines	2.6	2.7	0.84	6.1	2.2	3.2	1	0.99	100	0.2525	30
LPC 17:0	Lysophosphatidylcholine 17:0	Lysophosphatidylcholines	2	1.9	0.9	3.4	1.5	2.3	0.81	0.57	100	0.079	30
LPC 18:0	Lysophosphatidylcholine 18:0	Lysophosphatidylcholines	35	35	16	52	29	40	11	8.9	100	0.04279	30
LPC 18:1	Lysophosphatidylcholine 18:1	Lysophosphatidylcholines	19	21	8.7	46	16	25	9.4	7.4	100	0.4095	30
LPC 18:2	Lysophosphatidylcholine 18:2	Lysophosphatidylcholines	34	38	17	90	28	43	15	16	100	0.142	30
LPC 20:3	Lysophosphatidylcholine 20:3	Lysophosphatidylcholines	2	2.1	0.6	4.5	1.6	2.5	0.88	0.88	100	0.214	30
LPC 20:4	Lysophosphatidylcholine 20:4	Lysophosphatidylcholines	8.1	8.3	3.7	19	5.9	9.6	3.7	3	100	0.156	30
LPC 24:0	Lysophosphatidylcholine 24:0	Lysophosphatidylcholines	0.15	0.17	0.082	0.34	0.12	0.2	0.086	0.061	100	0.058535	30
LPC 26:0	Lysophosphatidylcholine 26:0	Lysophosphatidylcholines	0.22	0.25	0.13	0.44	0.18	0.35	0.17	0.096	73	0.0727	30
LPC 26:1	Lysophosphatidylcholine 26:1	Lysophosphatidylcholines	0.17	0.22	0.065	0.47	0.13	0.32	0.2	0.12	97	0.0895	30
Hypoxanthine	Hypoxanthine	Nucleobases and Related	2.6	2.9	0.52	5.9	1.9	3.7	1.8	1.3	97	0.13	30
Xanthine	Xanthine	Nucleobases and Related	0.57	0.91	0.43	5.6	0.51	0.79	0.28	1.2	60	0.495	30
PC 24:0	Phosphatidylcholine 24:0	Phosphatidylcholines	0.12	0.12	0.051	0.18	0.095	0.14	0.048	0.037	33	0.4	30
PC 26:0	Phosphatidylcholine 26:0	Phosphatidylcholines	0.93	0.85	0.45	1.1	0.55	1.1	0.52	0.29	13	0.03922	30
PC 28:1	Phosphatidylcholine 28:1	Phosphatidylcholines	3.5	3.8	1.6	5.5	3.2	4.6	1.4	0.88	100	0.8725	30
PC 30:0	Phosphatidylcholine 30:0	Phosphatidylcholines	3.4	3.5	1.8	6.3	2.6	4.2	1.5	1.1	100	0.03336	30
PC 30:2	Phosphatidylcholine 30:2	Phosphatidylcholines	0.02	0.02	0.0004	0.04				0.028	6.7	0.122	30
PC 32:0	Phosphatidylcholine 32:0	Phosphatidylcholines	12	12	6.9	19	10	14	3.4	2.7	100	0.02949	30
PC 32:1	Phosphatidylcholine 32:1	Phosphatidylcholines	8.6	9.5	2.9	22	5.6	13	7.3	4.7	100	0.0151042	30
PC 32:2	Phosphatidylcholine 32:2	Phosphatidylcholines	2.9	3.8	1.2	17	2.5	4.4	1.9	3	97	0.48	30
PC 32:3	Phosphatidylcholine 32:3	Phosphatidylcholines	0.79	0.77	0.34	1.2	0.71	0.84	0.13	0.15	100	0.00633	30
PC 34:1	Phosphatidylcholine 34:1	Phosphatidylcholines	150	153	84	260	115	183	68	45	100	0.096345	30
PC 34:2	Phosphatidylcholine 34:2	Phosphatidylcholines	336	347	243	465	298	385	87	58	100	0.174	30
PC 34:3	Phosphatidylcholine 34:3	Phosphatidylcholines	16	16	7.1	28	12	19	6.4	4.5	100	0.061205	30
PC 34:4	Phosphatidylcholine 34:4	Phosphatidylcholines	1.8	1.9	0.79	2.9	1.6	2.4	0.82	0.57	100	0.0141726	30
PC 36:0	Phosphatidylcholine 36:0	Phosphatidylcholines	1.8	1.9	0.55	3.9	1.3	2.3	0.98	0.79	100	0.282	30
PC 36:1	Phosphatidylcholine 36:1	Phosphatidylcholines	40	41	25	65	32	47	15	10	100	0.04206	30
PC 36:2	Phosphatidylcholine 36:2	Phosphatidylcholines	213	222	155	318	188	246	58	41	100	0.1185	30
PC 36:3	Phosphatidylcholine 36:3	Phosphatidylcholines	115	115	67	181	94	131	37	29	100	0.05691	30
PC 36:4	Phosphatidylcholine 36:4	Phosphatidylcholines	187	190	101	275	156	216	60	38	100	0.083375	30
PC 36:5	Phosphatidylcholine 36:5	Phosphatidylcholines	22	24	10	82	15	25	9.8	13	100	0.027775	30
PC 36:6	Phosphatidylcholine 36:6	Phosphatidylcholines	0.97	0.98	0.38	2.2	0.7	1.1	0.43	0.41	100	0.00875	30
PC 38:0	Phosphatidylcholine 38:0	Phosphatidylcholines	3.3	3.4	1.6	6.5	2.5	3.9	1.4	1	100	0.97	30
PC 38:1	Phosphatidylcholine 38:1	Phosphatidylcholines	0.53	0.57	0.18	0.98	0.38	0.84	0.45	0.23	100	0.03304	30
PC 38:3	Phosphatidylcholine 38:3	Phosphatidylcholines	41	41	21	69	33	46	13	11	100	0.05754	30
PC 38:4	Phosphatidylcholine 38:4	Phosphatidylcholines	110	117	66	175	96	135	39	28	100	0.0385	30
PC 38:5	Phosphatidylcholine 38:5	Phosphatidylcholines	48	50	28	93	40	56	15	14	100	0.035	30
PC 38:6	Phosphatidylcholine 38:6	Phosphatidylcholines	72	77	44	146	62	98	36	23	100	0.4305	30
PC 40:1	Phosphatidylcholine 40:1	Phosphatidylcholines	0.47	0.47	0.37	0.61	0.42	0.51	0.086	0.07	30	0.016525	30
PC 40:2	Phosphatidylcholine 40:2	Phosphatidylcholines	0.24	0.24	0.12	0.34	0.21	0.28	0.07	0.052	100	0.19	30
PC 40:3	Phosphatidylcholine 40:3	Phosphatidylcholines	0.42	0.42	0.23	0.6	0.34	0.49	0.15	0.091	100	0.0192925	30
PC 40:4	Phosphatidylcholine 40:4	Phosphatidylcholines	2.7	2.7	1.4	4.5	2.3	3.1	0.84	0.82	100	0.033	30
PC 40:5	Phosphatidylcholine 40:5	Phosphatidylcholines	7.3	7.4	3.8	14	5.9	8.6	2.7	2.3	100	0.219	30
PC 40:6	Phosphatidylcholine 40:6	Phosphatidylcholines	27	27	13	42	22	33	12	8.1	100	0.0424	30
PC 42:0	Phosphatidylcholine 42:0	Phosphatidylcholines	0.46	0.5	0.23	0.92	0.42	0.6	0.18	0.13	100	0.01122	30
PC 42:1	Phosphatidylcholine 42:1	Phosphatidylcholines	0.28	0.29	0.14	0.49	0.24	0.33	0.098	0.083	100	0.119	30
PC 42:2	Phosphatidylcholine 42:2	Phosphatidylcholines	0.25	0.26	0.14	0.43	0.2	0.31	0.1	0.071	100	0.01136	30
PC 42:4	Phosphatidylcholine 42:4	Phosphatidylcholines	0.14	0.14	0.087	0.24	0.12	0.16	0.044	0.031	100	0.011	30
PC 42:5	Phosphatidylcholine 42:5	Phosphatidylcholines	0.25	0.25	0.12	0.42	0.2	0.27	0.072	0.07	100	0.17	30
PC 42:6	Phosphatidylcholine 42:6	Phosphatidylcholines	0.36	0.4	0.21	0.77	0.3	0.44	0.14	0.13	100	0.135	30
PC O-28:0	Phosphatidylcholine O-28:0	Phosphatidylcholines	0.28	0.3	0.19	0.46	0.24	0.35	0.11	0.08	60	0.0619	30
PC O-28:1	Phosphatidylcholine O-28:1	Phosphatidylcholines	0.41	0.41	0.16	0.72	0.27	0.56	0.29	0.15	100	0.166	30
PC O-30:0	Phosphatidylcholine O-30:0	Phosphatidylcholines	0.29	0.3	0.15	0.51	0.25	0.35	0.11	0.078	100	0.033	30
PC O-30:1	Phosphatidylcholine O-30:1	Phosphatidylcholines	0.25	0.28	0.057	0.56	0.12	0.42	0.29	0.16	47	0.05	30
PC O-30:2	Phosphatidylcholine O-30:2	Phosphatidylcholines	0.14	0.13	0.066	0.2	0.1	0.16	0.062	0.035	100	0.00852	30
PC O-32:1	Phosphatidylcholine O-32:1	Phosphatidylcholines	2.5	2.5	1.4	4.1	2.2	3	0.75	0.53	100	0.026175	30
PC O-32:2	Phosphatidylcholine O-32:2	Phosphatidylcholines	0.84	0.86	0.52	1.3	0.72	0.96	0.24	0.19	100	0.015695	30
PC O-34:0	Phosphatidylcholine O-34:0	Phosphatidylcholines	1.3	1.3	0.63	1.9	0.98	1.6	0.59	0.35	100	0.01855	30
PC O-34:1	Phosphatidylcholine O-34:1	Phosphatidylcholines	8	7.8	4.1	11	6.8	9	2.2	1.7	100	0.017	30
PC O-34:2	Phosphatidylcholine O-34:2	Phosphatidylcholines	12	12	5.3	19	9.3	14	4.5	3.1	100	0.027135	30
PC O-34:3	Phosphatidylcholine O-34:3	Phosphatidylcholines	8.8	8.8	4.5	13	7.3	10	3.1	2.2	100	0.335	30
PC O-36:0	Phosphatidylcholine O-36:0	Phosphatidylcholines	0.7	0.76	0.47	1.8	0.6	0.82	0.23	0.27	100	2.82	30
PC O-36:1	Phosphatidylcholine O-36:1	Phosphatidylcholines	6.4	6.4	3.1	10	5.5	7.3	1.8	1.5	100	0.040903	30
PC O-36:2	Phosphatidylcholine O-36:2	Phosphatidylcholines	13	13	8.2	18	11	15	3.8	2.6	100	0.01898	30
PC O-36:3	Phosphatidylcholine O-36:3	Phosphatidylcholines	7.5	7.4	3.3	11	5.6	9	3.4	1.9	100	0.030305	30
PC O-36:4	Phosphatidylcholine O-36:4	Phosphatidylcholines	17	18	8	33	15	21	6	5.2	100	0.01406	30
PC O-36:5	Phosphatidylcholine O-36:5	Phosphatidylcholines	13	14	6.7	22	12	16	4.8	3.8	100	0.685	30
PC O-38:0	Phosphatidylcholine O-38:0	Phosphatidylcholines	2.1	2.3	1.3	5.6	1.8	2.6	0.77	0.84	100	0.0099198	30
PC O-38:1	Phosphatidylcholine O-38:1	Phosphatidylcholines	0.29	0.27	0.041	0.65	0.13	0.34	0.21	0.17	83	0.00937	30
PC O-38:2	Phosphatidylcholine O-38:2	Phosphatidylcholines	1.4	1.4	0.88	2.5	1.1	1.7	0.61	0.37	100	0.013125	30
PC O-38:3	Phosphatidylcholine O-38:3	Phosphatidylcholines	3.1	3.1	1.7	4.7	2.6	3.5	0.91	0.74	100	0.02148	30
PC O-38:4	Phosphatidylcholine O-38:4	Phosphatidylcholines	12	12	7.1	19	10	14	3.9	2.9	100	0.028935	30
PC O-38:5	Phosphatidylcholine O-38:5	Phosphatidylcholines	17	18	8.8	30	16	20	4.5	4.3	100	0.010565	30
PC O-38:6	Phosphatidylcholine O-38:6	Phosphatidylcholines	8.3	8.5	4	15	7.2	9.6	2.5	2.3	100	0.0110284	30
PC O-40:1	Phosphatidylcholine O-40:1	Phosphatidylcholines	1.2	1.4	0.78	2.6	1.1	1.5	0.46	0.43	100	0.017	30
PC O-40:2	Phosphatidylcholine O-40:2	Phosphatidylcholines	1.5	1.6	0.86	2.3	1.4	1.8	0.46	0.34	100	0.020575	30
PC O-40:3	Phosphatidylcholine O-40:3	Phosphatidylcholines	0.87	0.87	0.49	1.2	0.74	1	0.28	0.18	100	0.063	30
PC O-40:4	Phosphatidylcholine O-40:4	Phosphatidylcholines	2	2	1.1	3.4	1.7	2.2	0.6	0.49	100	0.014	30
PC O-40:5	Phosphatidylcholine O-40:5	Phosphatidylcholines	3	3.1	1.9	4.7	2.6	3.4	0.8	0.74	100	0.0194	30
PC O-40:6	Phosphatidylcholine O-40:6	Phosphatidylcholines	4.2	4.4	2.5	7.3	3.9	5.1	1.2	1.1	100	0.696	30
PC O-42:0	Phosphatidylcholine O-42:0	Phosphatidylcholines									0	0.08374	30
PC O-42:1	Phosphatidylcholine O-42:1	Phosphatidylcholines	0.33	0.34	0.18	0.55	0.28	0.41	0.12	0.089	100	0.02857	30
PC O-42:2	Phosphatidylcholine O-42:2	Phosphatidylcholines	0.47	0.47	0.21	0.73	0.39	0.54	0.15	0.12	100	0.01807	30
PC O-42:3	Phosphatidylcholine O-42:3	Phosphatidylcholines	0.61	0.65	0.37	1.1	0.52	0.79	0.27	0.18	100	0.167	30
PC O-42:4	Phosphatidylcholine O-42:4	Phosphatidylcholines	0.64	0.68	0.29	1.4	0.52	0.77	0.26	0.23	100	0.673	30
PC O-42:5	Phosphatidylcholine O-42:5	Phosphatidylcholines	1.5	1.6	0.9	2.8	1.3	1.8	0.45	0.42	100	0.06	30
PC O-44:3	Phosphatidylcholine O-44:3	Phosphatidylcholines	0.11	0.11	0.064	0.17	0.095	0.13	0.032	0.028	100	0.118	30
PC O-44:4	Phosphatidylcholine O-44:4	Phosphatidylcholines	0.23	0.25	0.12	0.47	0.21	0.26	0.058	0.067	87	0.072785	30
PC O-44:5	Phosphatidylcholine O-44:5	Phosphatidylcholines	0.96	1.1	0.59	2.2	0.8	1.2	0.44	0.38	100	0.07648	30
PC O-44:6	Phosphatidylcholine O-44:6	Phosphatidylcholines	0.96	1	0.46	2.2	0.87	1.1	0.23	0.35	100	0.02028	30
SM 33:1	Sphingomyelin 33:1	Sphingomyelins	5.8	5.9	2.9	8.5	4.9	6.5	1.7	1.4	100	0.004	30
SM 34:1	Sphingomyelin 34:1	Sphingomyelins	107	108	68	158	93	120	27	20	100	0.032	30
SM 34:2	Sphingomyelin 34:2	Sphingomyelins	17	17	11	24	16	19	3.3	3	100	0.0216186	30
SM 35:1	Sphingomyelin 35:1	Sphingomyelins	3.4	3.4	1.9	4.7	3	3.8	0.78	0.66	100	0.021	30
SM 36:1	Sphingomyelin 36:1	Sphingomyelins	24	24	12	32	21	27	5.7	4.7	100	0.009	30
SM 36:2	Sphingomyelin 36:2	Sphingomyelins	13	13	7.1	18	12	14	2.2	2.4	100	0.005	30
SM 38:3	Sphingomyelin 38:3	Sphingomyelins	0.49	0.5	0.18	0.71	0.43	0.59	0.16	0.12	100	0.032	30
SM 40:4	Sphingomyelin 40:4	Sphingomyelins	0.085	0.12	0.039	0.36	0.053	0.15	0.097	0.089	47	0.031	30
SM 41:1	Sphingomyelin 41:1	Sphingomyelins	12	12	5.5	17	11	13	2.2	2.6	100	0.009	30
SM 41:2	Sphingomyelin 41:2	Sphingomyelins	9.6	9.6	5	13	8.7	11	1.9	1.9	100	0.00719	30
SM 42:1	Sphingomyelin 42:1	Sphingomyelins	18	19	9.1	27	15	22	7.4	4.7	100	0.045	30
SM 42:2	Sphingomyelin 42:2	Sphingomyelins	39	39	19	63	33	45	13	9.8	100	0.0044	30
SM 43:1	Sphingomyelin 43:1	Sphingomyelins	1.1	1.1	0.6	1.7	0.96	1.3	0.3	0.27	100	0.08305	30
SM 44:1	Sphingomyelin 44:1	Sphingomyelins	0.14	0.14	0.07	0.26	0.12	0.17	0.051	0.044	100	0.159	30
SM 44:2	Sphingomyelin 44:2	Sphingomyelins	0.29	0.29	0.16	0.55	0.21	0.32	0.1	0.096	100	0.325	30
TG 14:0_32:2	Triacylglyceride 14:0_32:2	Triglycerides	0.92	1.3	0.28	5.2	0.56	1.6	1	1.2	77	0.629	30
TG 14:0_34:0	Triacylglyceride 14:0_34:0	Triglycerides	1.3	1.9	0.33	5.3	0.95	3.1	2.2	1.4	63	0.189	30
TG 14:0_34:1	Triacylglyceride 14:0_34:1	Triglycerides	6.7	9.8	1.9	33	3.2	10	7	9.2	97	0.216	30
TG 14:0_34:2	Triacylglyceride 14:0_34:2	Triglycerides	6	7.6	0.72	28	3.1	8.6	5.5	6.9	100	0.26075	30
TG 14:0_34:3	Triacylglyceride 14:0_34:3	Triglycerides	1.6	2	0.42	8.3	0.86	2	1.1	1.9	97	0.1175	30
TG 14:0_35:1	Triacylglyceride 14:0_35:1	Triglycerides	0.37	0.5	0.27	1.2	0.29	0.67	0.38	0.27	60	0.214	30
TG 14:0_35:2	Triacylglyceride 14:0_35:2	Triglycerides	0.42	0.6	0.21	1.6	0.34	0.78	0.44	0.41	60	1.075	30
TG 14:0_36:1	Triacylglyceride 14:0_36:1	Triglycerides	1.6	2.6	0.84	9	1.1	3	1.8	2.1	97	1.585	30
TG 14:0_36:2	Triacylglyceride 14:0_36:2	Triglycerides	9.9	13	1.3	47	6.4	15	8.1	9.9	100	0.108	30
TG 14:0_36:3	Triacylglyceride 14:0_36:3	Triglycerides	11	15	1.9	45	8	18	10	11	100	0.0715	30
TG 14:0_36:4	Triacylglyceride 14:0_36:4	Triglycerides	5.1	6.6	1	20	3.2	9	5.7	4.5	100	0.0981	30
TG 14:0_38:4	Triacylglyceride 14:0_38:4	Triglycerides	0.44	0.51	0.15	1.3	0.27	0.65	0.38	0.32	97	0.0470066	30
TG 14:0_38:5	Triacylglyceride 14:0_38:5	Triglycerides	0.42	0.6	0.17	1.7	0.36	0.82	0.47	0.41	97	0.16	30
TG 14:0_39:3	Triacylglyceride 14:0_39:3	Triglycerides	0.031	0.04	0.03	0.069	0.03	0.053	0.023	0.017	17	0.204	30
TG 16:0_28:1	Triacylglyceride 16:0_28:1	Triglycerides	1.4	1.9	0.17	5.1	0.8	2.9	2.1	1.6	33	0.177	30
TG 16:0_28:2	Triacylglyceride 16:0_28:2	Triglycerides	0.44	0.65	0.21	1.4	0.33	0.99	0.66	0.4	50	0.796	30
TG 16:0_30:2	Triacylglyceride 16:0_30:2	Triglycerides	0.78	2	0.33	13	0.54	2.4	1.9	3.2	90	0.473	30
TG 16:0_32:0	Triacylglyceride 16:0_32:0	Triglycerides	7.3	10	2.1	33	3.6	13	9.9	9.2	87	0.246	30
TG 16:0_32:1	Triacylglyceride 16:0_32:1	Triglycerides	11	17	1.3	64	4.9	18	13	17	100	0.08682	30
TG 16:0_32:2	Triacylglyceride 16:0_32:2	Triglycerides	7.1	9.3	0.91	36	3.4	10	7	9	100	0.441	30
TG 16:0_32:3	Triacylglyceride 16:0_32:3	Triglycerides	1.2	1.6	0.2	6.6	0.64	1.9	1.2	1.6	100	0.145	30
TG 16:0_33:1	Triacylglyceride 16:0_33:1	Triglycerides	1.9	2.5	0.74	8	1.1	3.1	2	2	93	0.701	30
TG 16:0_33:2	Triacylglyceride 16:0_33:2	Triglycerides	1.2	1.6	0.47	4.3	0.77	1.9	1.1	1.1	90	0.823	30
TG 16:0_34:0	Triacylglyceride 16:0_34:0	Triglycerides	6.8	9.7	1.6	33	3.5	12	8.2	8.6	100	0.491	30
TG 16:0_34:1	Triacylglyceride 16:0_34:1	Triglycerides	53	72	12	262	27	82	55	63	100	0.207	30
TG 16:0_34:2	Triacylglyceride 16:0_34:2	Triglycerides	54	71	16	280	32	83	51	59	100	0.332	30
TG 16:0_34:3	Triacylglyceride 16:0_34:3	Triglycerides	16	22	4.2	93	11	25	15	20	100	0.269	30
TG 16:0_34:4	Triacylglyceride 16:0_34:4	Triglycerides	1.9	2.4	0.34	7.9	1.2	2.7	1.5	1.8	100	0.166	30
TG 16:0_35:1	Triacylglyceride 16:0_35:1	Triglycerides	1.6	2.3	0.59	8.1	1.2	2.8	1.6	1.9	93	0.08668	30
TG 16:0_35:2	Triacylglyceride 16:0_35:2	Triglycerides	2.8	3.7	0.76	14	1.9	4.5	2.6	3.1	100	0.596	30
TG 16:0_35:3	Triacylglyceride 16:0_35:3	Triglycerides	1.5	1.9	0.44	7.3	1	2.2	1.2	1.6	100	0.508	30
TG 16:0_36:2	Triacylglyceride 16:0_36:2	Triglycerides	135	167	33	653	87	207	120	128	100	0.277	30
TG 16:0_36:3	Triacylglyceride 16:0_36:3	Triglycerides	187	219	56	750	107	262	154	158	100	0.088265	30
TG 16:0_36:4	Triacylglyceride 16:0_36:4	Triglycerides	76	98	25	310	51	126	75	69	100	0.185	30
TG 16:0_36:5	Triacylglyceride 16:0_36:5	Triglycerides	9.2	12	3.7	36	6.5	18	12	8.3	100	0.141	30
TG 16:0_36:6	Triacylglyceride 16:0_36:6	Triglycerides	0.95	1.1	0.2	2.5	0.6	1.5	0.85	0.63	100	0.186	30
TG 16:0_37:3	Triacylglyceride 16:0_37:3	Triglycerides	0.57	0.75	0.23	2.3	0.41	0.78	0.37	0.54	87	0.333	30
TG 16:0_38:1	Triacylglyceride 16:0_38:1	Triglycerides	0.71	0.89	0.26	2.7	0.49	1	0.54	0.61	70	0.655	30
TG 16:0_38:2	Triacylglyceride 16:0_38:2	Triglycerides	1.4	1.9	0.67	7.2	1.1	2.3	1.3	1.4	97	0.71	30
TG 16:0_38:3	Triacylglyceride 16:0_38:3	Triglycerides	3.2	3.7	0.93	12	1.9	4.4	2.5	2.6	100	0.072	30
TG 16:0_38:4	Triacylglyceride 16:0_38:4	Triglycerides	4.4	5.1	1.3	17	2.8	6.3	3.6	3.3	100	0.06085	30
TG 16:0_38:5	Triacylglyceride 16:0_38:5	Triglycerides	5.2	6	1.6	15	3.7	7.8	4.1	3.3	100	0.176	30
TG 16:0_38:6	Triacylglyceride 16:0_38:6	Triglycerides	3.4	4	1.4	8.4	2.7	5.2	2.5	1.9	100	0.07978	30
TG 16:0_38:7	Triacylglyceride 16:0_38:7	Triglycerides	0.96	1.1	0.39	2	0.64	1.5	0.84	0.48	100	0.14235	30
TG 16:0_40:6	Triacylglyceride 16:0_40:6	Triglycerides	2.5	3	0.94	8.5	1.8	4.1	2.3	1.8	100	0.0785	30
TG 16:0_40:7	Triacylglyceride 16:0_40:7	Triglycerides	3.3	3.7	1.1	9.5	2.1	4.5	2.3	2.1	100	0.1395	30
TG 16:0_40:8	Triacylglyceride 16:0_40:8	Triglycerides	1.8	1.9	0.46	6.9	1.2	2.4	1.3	1.3	100	0.219	30
TG 16:1_28:0	Triacylglyceride 16:1_28:0	Triglycerides	0.6	0.92	0.12	2.8	0.32	1.5	1.2	0.97	30	0.33	30
TG 16:1_30:1	Triacylglyceride 16:1_30:1	Triglycerides	0.78	1.2	0.25	4.4	0.54	1.6	1.1	1.1	53	0.379	30
TG 16:1_32:0	Triacylglyceride 16:1_32:0	Triglycerides	2.4	3.4	0.72	14	1.1	4	2.9	3.4	93	0.216	30
TG 16:1_32:1	Triacylglyceride 16:1_32:1	Triglycerides	3.2	4.9	1.2	18	2	5.2	3.2	4.6	87	0.441	30
TG 16:1_32:2	Triacylglyceride 16:1_32:2	Triglycerides	1.5	1.9	0.49	7.8	0.9	2	1.1	1.8	93	0.183	30
TG 16:1_33:1	Triacylglyceride 16:1_33:1	Triglycerides	0.66	0.82	0.26	2.3	0.48	0.88	0.4	0.55	73	0.367	30
TG 16:1_34:0	Triacylglyceride 16:1_34:0	Triglycerides	2.2	3.3	0.82	12	1.4	4	2.6	2.9	93	0.233	30
TG 16:1_34:1	Triacylglyceride 16:1_34:1	Triglycerides	17	25	2.9	102	11	31	20	24	100	0.101	30
TG 16:1_34:2	Triacylglyceride 16:1_34:2	Triglycerides	15	20	3.3	85	9.2	22	13	18	100	0.165	30
TG 16:1_34:3	Triacylglyceride 16:1_34:3	Triglycerides	3	4.2	0.46	15	2	5.1	3.1	3.4	100	0.218	30
TG 16:1_36:1	Triacylglyceride 16:1_36:1	Triglycerides	3.3	4.1	1.4	16	2.2	4.8	2.7	3.2	97	0.1515	30
TG 16:1_36:2	Triacylglyceride 16:1_36:2	Triglycerides	17	22	2.9	94	12	26	14	17	100	0.087	30
TG 16:1_36:3	Triacylglyceride 16:1_36:3	Triglycerides	23	27	4.5	95	15	31	16	19	100	0.049255	30
TG 16:1_36:4	Triacylglyceride 16:1_36:4	Triglycerides	9.8	12	3	33	6.6	14	7.4	7.9	100	0.14	30
TG 16:1_36:5	Triacylglyceride 16:1_36:5	Triglycerides	1.6	1.9	0.39	4.5	0.99	2.6	1.6	1.2	100	0.147	30
TG 16:1_38:3	Triacylglyceride 16:1_38:3	Triglycerides	0.52	0.61	0.23	2.1	0.42	0.68	0.27	0.39	97	0.22	30
TG 16:1_38:4	Triacylglyceride 16:1_38:4	Triglycerides	0.77	0.91	0.17	2.5	0.58	1.1	0.56	0.53	100	0.225	30
TG 16:1_38:5	Triacylglyceride 16:1_38:5	Triglycerides	0.99	1.1	0.28	2.4	0.79	1.4	0.61	0.52	100	0.121	30
TG 17:0_32:1	Triacylglyceride 17:0_32:1	Triglycerides	0.48	0.59	0.17	1.2	0.37	0.88	0.51	0.34	53	0.132	30
TG 17:0_34:1	Triacylglyceride 17:0_34:1	Triglycerides	1.5	2.1	0.63	6.8	1.2	2.4	1.1	1.5	93	0.0759	30
TG 17:0_34:2	Triacylglyceride 17:0_34:2	Triglycerides	1.5	1.8	0.5	5.3	1.1	2.1	1	1.1	100	0.07783	30
TG 17:0_34:3	Triacylglyceride 17:0_34:3	Triglycerides	0.5	0.57	0.14	1.7	0.37	0.66	0.29	0.35	100	0.05679	30
TG 17:0_36:3	Triacylglyceride 17:0_36:3	Triglycerides	3.5	4	1.2	14	2.4	4.7	2.3	2.5	100	0.183	30
TG 17:0_36:4	Triacylglyceride 17:0_36:4	Triglycerides	1.6	1.9	0.68	4.5	1.1	2.5	1.4	1	100	0.2255	30
TG 17:1_32:1	Triacylglyceride 17:1_32:1	Triglycerides	0.56	0.84	0.25	2.3	0.48	1.1	0.6	0.61	63	0.100895	30
TG 17:1_34:1	Triacylglyceride 17:1_34:1	Triglycerides	1.9	2.4	0.64	9.3	1.1	2.7	1.7	2.1	97	0.0718	30
TG 17:1_34:2	Triacylglyceride 17:1_34:2	Triglycerides	1.4	1.9	0.37	7.3	1	2.2	1.1	1.5	100	0.05202	30
TG 17:1_34:3	Triacylglyceride 17:1_34:3	Triglycerides	0.51	0.64	0.26	2.3	0.35	0.6	0.25	0.5	87	0.050025	30
TG 17:1_36:3	Triacylglyceride 17:1_36:3	Triglycerides	1.6	1.9	0.46	6.2	1	2.1	1.1	1.2	100	0.0569	30
TG 17:1_36:4	Triacylglyceride 17:1_36:4	Triglycerides	0.82	0.96	0.3	2.7	0.51	1.2	0.67	0.56	100	0.014	30
TG 17:1_36:5	Triacylglyceride 17:1_36:5	Triglycerides	0.24	0.28	0.11	0.62	0.18	0.39	0.21	0.14	97	0.019675	30
TG 17:1_38:5	Triacylglyceride 17:1_38:5	Triglycerides	0.01	0.035	0.0044	0.19	0.005	0.013	0.0081	0.069	23	0.02356	30
TG 17:1_38:6	Triacylglyceride 17:1_38:6	Triglycerides	0.022	0.024	0.015	0.044	0.015	0.03	0.015	0.011	20	0.093	30
TG 17:1_38:7	Triacylglyceride 17:1_38:7	Triglycerides	0.038	0.039	0.023	0.066	0.025	0.047	0.022	0.015	20	0.05748	30
TG 17:2_34:2	Triacylglyceride 17:2_34:2	Triglycerides	0.33	0.4	0.1	1.1	0.23	0.5	0.27	0.24	100	0.097	30
TG 17:2_34:3	Triacylglyceride 17:2_34:3	Triglycerides	0.17	0.21	0.077	0.46	0.14	0.27	0.13	0.099	80	0.1019	30
TG 17:2_36:2	Triacylglyceride 17:2_36:2	Triglycerides	0.39	0.41	0.11	1.2	0.29	0.46	0.17	0.23	100	0.1239	30
TG 17:2_36:3	Triacylglyceride 17:2_36:3	Triglycerides	0.4	0.48	0.15	1.2	0.27	0.67	0.4	0.24	100	0.0401	30
TG 17:2_36:4	Triacylglyceride 17:2_36:4	Triglycerides	0.45	0.51	0.16	1.9	0.33	0.6	0.27	0.32	100	0.0539	30
TG 17:2_38:5	Triacylglyceride 17:2_38:5	Triglycerides	0.17	0.2	0.079	0.6	0.11	0.24	0.12	0.11	100	0.031795	30
TG 17:2_38:6	Triacylglyceride 17:2_38:6	Triglycerides	0.31	0.34	0.082	1.1	0.24	0.43	0.2	0.19	97	0.1675	30
TG 17:2_38:7	Triacylglyceride 17:2_38:7	Triglycerides	0.085	0.098	0.045	0.17	0.068	0.13	0.061	0.039	70	0.307	30
TG 18:0_30:0	Triacylglyceride 18:0_30:0	Triglycerides	1.3	1.3	0.29	3.4	0.73	1.6	0.92	0.8	43	0.428	30
TG 18:0_30:1	Triacylglyceride 18:0_30:1	Triglycerides	0.88	1.1	0.14	4.7	0.37	1.4	1	1.2	47	0.18	30
TG 18:0_32:0	Triacylglyceride 18:0_32:0	Triglycerides	2.4	3.1	0.79	8.5	1.4	4	2.6	2.4	70	0.1135	30
TG 18:0_32:1	Triacylglyceride 18:0_32:1	Triglycerides	1.6	2.5	0.43	7.8	1	3.1	2.1	2.2	97	0.218	30
TG 18:0_32:2	Triacylglyceride 18:0_32:2	Triglycerides	0.89	1.3	0.42	3.2	0.58	2.1	1.5	0.88	90	0.072495	30
TG 18:0_34:2	Triacylglyceride 18:0_34:2	Triglycerides	7.6	9.6	2.3	29	4.6	13	8.2	7	100	0.5	30
TG 18:0_34:3	Triacylglyceride 18:0_34:3	Triglycerides	1.7	2.2	0.48	7.1	1.3	3	1.8	1.6	100	2.56	30
TG 18:0_36:1	Triacylglyceride 18:0_36:1	Triglycerides	4	4.7	1.1	9.6	1.5	8.7	7.2	3.5	30	0.271	30
TG 18:0_36:2	Triacylglyceride 18:0_36:2	Triglycerides	12	14	3.3	48	8.1	16	7.5	9.6	97	0.135	30
TG 18:0_36:3	Triacylglyceride 18:0_36:3	Triglycerides	16	18	5.3	56	10	21	11	11	100	0.037365	30
TG 18:0_36:4	Triacylglyceride 18:0_36:4	Triglycerides	9	9.9	3.4	25	5	11	6.3	5.6	100	0.07297	30
TG 18:0_36:5	Triacylglyceride 18:0_36:5	Triglycerides	1.3	1.5	0.5	3.8	0.79	1.7	0.87	0.89	100	0.095	30
TG 18:0_38:6	Triacylglyceride 18:0_38:6	Triglycerides	1.5	1.6	0.67	3.1	1	2	0.98	0.7	100	1.5755	30
TG 18:0_38:7	Triacylglyceride 18:0_38:7	Triglycerides	0.4	0.43	0.18	0.78	0.29	0.55	0.25	0.16	97	0.248	30
TG 18:1_26:0	Triacylglyceride 18:1_26:0	Triglycerides	1.4	1.7	0.21	6.5	0.52	2.3	1.8	1.8	37	0.601	30
TG 18:1_28:1	Triacylglyceride 18:1_28:1	Triglycerides	1.2	1.7	0.36	4.5	0.69	3	2.3	1.3	50	0.34	30
TG 18:1_30:0	Triacylglyceride 18:1_30:0	Triglycerides	7.8	12	2.4	37	4.1	15	10	11	97	0.226	30
TG 18:1_30:1	Triacylglyceride 18:1_30:1	Triglycerides	4.6	7.3	1.5	30	2.4	9	6.7	7.6	97	0.663	30
TG 18:1_30:2	Triacylglyceride 18:1_30:2	Triglycerides	1.4	2.7	0.29	14	0.84	2.7	1.8	3.4	100	0.592	30
TG 18:1_31:0	Triacylglyceride 18:1_31:0	Triglycerides	2.6	3	0.79	7.1	1.8	4.2	2.4	1.6	50	0.402	30
TG 18:1_32:0	Triacylglyceride 18:1_32:0	Triglycerides	32	42	6.8	158	16	49	33	38	100	0.2255	30
TG 18:1_32:1	Triacylglyceride 18:1_32:1	Triglycerides	38	49	4.9	188	22	59	37	42	100	0.06903	30
TG 18:1_32:2	Triacylglyceride 18:1_32:2	Triglycerides	16	18	2.1	58	9.5	21	11	13	100	0.181	30
TG 18:1_32:3	Triacylglyceride 18:1_32:3	Triglycerides	2.1	2.4	0.33	5.8	1.4	2.9	1.5	1.5	100	0.2	30
TG 18:1_33:0	Triacylglyceride 18:1_33:0	Triglycerides	1.8	2.4	0.64	9	1.2	3	1.8	1.8	97	0.126	30
TG 18:1_33:1	Triacylglyceride 18:1_33:1	Triglycerides	5.4	6.4	1	27	3.3	7.6	4.3	5.1	100	0.195	30
TG 18:1_33:2	Triacylglyceride 18:1_33:2	Triglycerides	2.6	3.1	0.77	11	1.8	4	2.2	2	100	0.907	30
TG 18:1_33:3	Triacylglyceride 18:1_33:3	Triglycerides	0.57	0.61	0.22	1.4	0.38	0.76	0.38	0.3	100	0.561	30
TG 18:1_34:1	Triacylglyceride 18:1_34:1	Triglycerides	234	273	55	1052	144	343	199	207	100	0.1655	30
TG 18:1_34:2	Triacylglyceride 18:1_34:2	Triglycerides	199	222	58	825	110	262	152	163	100	0.062285	30
TG 18:1_34:3	Triacylglyceride 18:1_34:3	Triglycerides	31	38	7.4	117	20	46	26	26	100	0.1195	30
TG 18:1_34:4	Triacylglyceride 18:1_34:4	Triglycerides	3.3	4	0.68	10	2.3	5.2	2.9	2.4	100	0.05142	30
TG 18:1_35:2	Triacylglyceride 18:1_35:2	Triglycerides	4.4	5.2	1.2	21	3.1	6.2	3	3.7	100	0.849	30
TG 18:1_35:3	Triacylglyceride 18:1_35:3	Triglycerides	1.7	1.9	0.46	7.2	1	2.4	1.4	1.3	100	0.69	30
TG 18:1_36:0	Triacylglyceride 18:1_36:0	Triglycerides	2.8	4	1.4	11	2.4	5.9	3.6	2.5	67	0.783	30
TG 18:1_36:1	Triacylglyceride 18:1_36:1	Triglycerides	26	30	6.6	123	16	35	19	23	100	15.8	30
TG 18:1_36:2	Triacylglyceride 18:1_36:2	Triglycerides	93	103	19	433	61	114	53	76	100	0.25	30
TG 18:1_36:3	Triacylglyceride 18:1_36:3	Triglycerides	100	116	18	425	77	144	66	77	100	0.07562	30
TG 18:1_36:4	Triacylglyceride 18:1_36:4	Triglycerides	44	48	11	119	27	53	26	28	100	0.216	30
TG 18:1_36:5	Triacylglyceride 18:1_36:5	Triglycerides	9.1	11	2.8	30	5.7	14	7.9	6.4	100	0.06176	30
TG 18:1_36:6	Triacylglyceride 18:1_36:6	Triglycerides	1	1.3	0.22	3.4	0.72	1.6	0.92	0.74	100	0.05392	30
TG 18:1_38:5	Triacylglyceride 18:1_38:5	Triglycerides	6	6.8	2.5	19	4.2	8.8	4.6	3.3	100	0.298	30
TG 18:1_38:6	Triacylglyceride 18:1_38:6	Triglycerides	4.3	4.8	2.1	11	3.5	6.1	2.6	2	100	0.125	30
TG 18:1_38:7	Triacylglyceride 18:1_38:7	Triglycerides	1.4	1.5	0.55	3.2	0.93	1.8	0.87	0.67	97	0.1525	30
TG 18:2_28:0	Triacylglyceride 18:2_28:0	Triglycerides	0.86	2.1	0.32	12	0.59	2.5	1.9	3.1	90	0.129	30
TG 18:2_30:0	Triacylglyceride 18:2_30:0	Triglycerides	5.6	7.8	0.92	30	3.1	9.6	6.5	7.5	100	0.411	30
TG 18:2_30:1	Triacylglyceride 18:2_30:1	Triglycerides	2.8	4.4	0.39	21	1.7	4.5	2.8	4.8	100	0.333	30
TG 18:2_31:0	Triacylglyceride 18:2_31:0	Triglycerides	2.3	2.5	0.44	4	1.4	3.9	2.5	1.4	23	0.229	30
TG 18:2_32:0	Triacylglyceride 18:2_32:0	Triglycerides	23	32	7.6	125	14	38	23	27	100	0.128	30
TG 18:2_32:1	Triacylglyceride 18:2_32:1	Triglycerides	24	32	5.3	118	16	39	23	26	100	0.208	30
TG 18:2_32:2	Triacylglyceride 18:2_32:2	Triglycerides	9.7	12	1.9	33	5.7	16	11	8.2	100	0.127	30
TG 18:2_33:0	Triacylglyceride 18:2_33:0	Triglycerides	1.2	1.7	0.49	5.3	0.98	2.1	1.1	1.1	100	0.078005	30
TG 18:2_33:1	Triacylglyceride 18:2_33:1	Triglycerides	3.4	4.4	1.2	16	2.6	5.8	3.2	3.1	100	0.2315	30
TG 18:2_33:2	Triacylglyceride 18:2_33:2	Triglycerides	1.8	2.3	0.62	6.6	1.3	3.3	2	1.4	100	0.495	30
TG 18:2_34:0	Triacylglyceride 18:2_34:0	Triglycerides	20	24	7.1	79	13	31	18	17	100	0.378	30
TG 18:2_34:1	Triacylglyceride 18:2_34:1	Triglycerides	168	200	54	680	104	236	132	141	100	0.1215	30
TG 18:2_34:2	Triacylglyceride 18:2_34:2	Triglycerides	129	156	43	476	76	197	121	108	100	0.057	30
TG 18:2_34:3	Triacylglyceride 18:2_34:3	Triglycerides	21	25	6.9	69	13	34	20	17	100	0.114	30
TG 18:2_34:4	Triacylglyceride 18:2_34:4	Triglycerides	2.2	2.6	0.57	5.9	1.3	4	2.7	1.6	100	0.06609	30
TG 18:2_35:1	Triacylglyceride 18:2_35:1	Triglycerides	3.5	4.1	1.3	13	2.5	5	2.5	2.6	100	0.047425	30
TG 18:2_35:2	Triacylglyceride 18:2_35:2	Triglycerides	3.1	3.7	1.4	13	2	4.7	2.8	2.4	100	0.566	30
TG 18:2_35:3	Triacylglyceride 18:2_35:3	Triglycerides	1	1.3	0.38	3.7	0.66	1.5	0.8	0.78	100	3.72	30
TG 18:2_36:0	Triacylglyceride 18:2_36:0	Triglycerides	2.1	2.7	1.1	8.6	1.5	3.2	1.6	1.7	97	8.23	30
TG 18:2_36:1	Triacylglyceride 18:2_36:1	Triglycerides	19	22	6	69	12	24	12	13	100	6.29	30
TG 18:2_36:2	Triacylglyceride 18:2_36:2	Triglycerides	59	68	13	223	42	79	37	42	100	0.2455	30
TG 18:2_36:3	Triacylglyceride 18:2_36:3	Triglycerides	57	66	13	162	34	81	48	39	100	0.052265	30
TG 18:2_36:4	Triacylglyceride 18:2_36:4	Triglycerides	24	31	8.4	78	14	43	29	19	100	0.039855	30
TG 18:2_36:5	Triacylglyceride 18:2_36:5	Triglycerides	5.8	7.3	2.1	23	3.2	10	6.9	5.1	100	0.03866	30
TG 18:2_38:4	Triacylglyceride 18:2_38:4	Triglycerides	3.2	3.5	1.6	8	2	4.1	2.2	1.7	100	0.04415	30
TG 18:2_38:5	Triacylglyceride 18:2_38:5	Triglycerides	4.4	4.9	2.1	10	3.1	6.3	3.2	2.2	100	0.066435	30
TG 18:2_38:6	Triacylglyceride 18:2_38:6	Triglycerides	3.4	3.5	1.3	6.5	2.3	4.2	1.9	1.4	100	0.1495	30
TG 18:3_30:0	Triacylglyceride 18:3_30:0	Triglycerides	0.61	0.91	0.19	3.5	0.35	1.1	0.7	0.85	97	0.418	30
TG 18:3_32:0	Triacylglyceride 18:3_32:0	Triglycerides	2.2	3.2	0.62	10	1.4	4.1	2.7	2.4	100	0.04214	30
TG 18:3_32:1	Triacylglyceride 18:3_32:1	Triglycerides	3	3.6	0.42	11	1.8	4.3	2.5	2.7	100	0.1155	30
TG 18:3_33:2	Triacylglyceride 18:3_33:2	Triglycerides	0.2	0.19	0.043	0.34	0.12	0.25	0.13	0.092	30	0.158	30
TG 18:3_34:0	Triacylglyceride 18:3_34:0	Triglycerides	2.2	2.8	0.73	8.1	1.6	3.3	1.8	1.8	100	0.1065	30
TG 18:3_34:1	Triacylglyceride 18:3_34:1	Triglycerides	18	22	5.4	60	12	27	15	14	100	0.070245	30
TG 18:3_34:2	Triacylglyceride 18:3_34:2	Triglycerides	13	16	4.3	43	8.3	22	13	9.6	100	0.123	30
TG 18:3_34:3	Triacylglyceride 18:3_34:3	Triglycerides	2.5	2.8	0.53	6.9	1.3	3.8	2.5	1.7	100	0.06133	30
TG 18:3_35:2	Triacylglyceride 18:3_35:2	Triglycerides	0.45	0.55	0.15	1.3	0.29	0.81	0.51	0.3	100	0.0804964	30
TG 18:3_36:1	Triacylglyceride 18:3_36:1	Triglycerides	2.5	2.7	0.83	6.4	1.7	3.3	1.7	1.4	100	0.07724	30
TG 18:3_36:2	Triacylglyceride 18:3_36:2	Triglycerides	9.5	10	2.3	26	6.1	13	6.8	5.7	100	0.068	30
TG 18:3_36:3	Triacylglyceride 18:3_36:3	Triglycerides	9.9	12	2.9	30	6.4	15	8.4	7	100	0.152	30
TG 18:3_36:4	Triacylglyceride 18:3_36:4	Triglycerides	4.3	5	1.3	15	2.4	6.3	3.9	3.3	100	0.113	30
TG 18:3_38:5	Triacylglyceride 18:3_38:5	Triglycerides	0.78	0.97	0.3	3.3	0.65	1.2	0.51	0.58	100	0.245	30
TG 18:3_38:6	Triacylglyceride 18:3_38:6	Triglycerides	0.6	0.7	0.25	3.3	0.39	0.71	0.32	0.55	100	0.1235	30
TG 20:0_32:3	Triacylglyceride 20:0_32:3	Triglycerides	0.47	0.58	0.18	2	0.33	0.72	0.39	0.39	100	0.167	30
TG 20:0_32:4	Triacylglyceride 20:0_32:4	Triglycerides	0.58	0.7	0.12	2	0.39	0.81	0.43	0.47	100	0.02262	30
TG 20:0_34:1	Triacylglyceride 20:0_34:1	Triglycerides	0.81	0.91	0.33	1.9	0.43	1.3	0.83	0.49	87	0.018395	30
TG 20:1_24:3	Triacylglyceride 20:1_24:3	Triglycerides									0	0.09108	30
TG 20:1_26:1	Triacylglyceride 20:1_26:1	Triglycerides									0	0.047	30
TG 20:1_30:1	Triacylglyceride 20:1_30:1	Triglycerides	0.27	0.3	0.099	0.53	0.16	0.45	0.29	0.16	27	0.0905	30
TG 20:1_31:0	Triacylglyceride 20:1_31:0	Triglycerides									0	0.102	30
TG 20:1_32:1	Triacylglyceride 20:1_32:1	Triglycerides	0.41	0.52	0.19	1.4	0.31	0.67	0.36	0.32	73	0.099	30
TG 20:1_32:2	Triacylglyceride 20:1_32:2	Triglycerides	0.34	0.4	0.15	1.1	0.26	0.46	0.21	0.21	100	0.1145	30
TG 20:1_32:3	Triacylglyceride 20:1_32:3	Triglycerides	0.26	0.3	0.12	0.79	0.2	0.35	0.15	0.16	93	0.099165	30
TG 20:1_34:0	Triacylglyceride 20:1_34:0	Triglycerides	0.37	0.46	0.12	1.1	0.23	0.66	0.43	0.29	40	0.33	30
TG 20:1_34:1	Triacylglyceride 20:1_34:1	Triglycerides	1.3	1.7	0.39	7.2	0.78	1.9	1.2	1.4	97	0.116	30
TG 20:1_34:2	Triacylglyceride 20:1_34:2	Triglycerides	1.3	1.5	0.39	5	0.78	1.8	0.99	1	100	0.145	30
TG 20:1_34:3	Triacylglyceride 20:1_34:3	Triglycerides	0.33	0.39	0.14	1.2	0.22	0.48	0.26	0.23	97	0.0827	30
TG 20:2_32:0	Triacylglyceride 20:2_32:0	Triglycerides	0.42	0.59	0.22	2.4	0.29	0.66	0.37	0.5	87	0.05495	30
TG 20:2_32:1	Triacylglyceride 20:2_32:1	Triglycerides	0.62	0.74	0.21	2.5	0.38	0.89	0.51	0.52	97	0.041	30
TG 20:2_34:1	Triacylglyceride 20:2_34:1	Triglycerides	1.9	2.4	0.5	8.3	1.4	2.9	1.5	1.8	100	0.106	30
TG 20:2_34:2	Triacylglyceride 20:2_34:2	Triglycerides	1.8	2	0.57	5.9	1.1	2.7	1.6	1.3	100	0.01616	30
TG 20:2_34:3	Triacylglyceride 20:2_34:3	Triglycerides	0.45	0.57	0.16	2.1	0.29	0.7	0.4	0.43	100	0.0419	30
TG 20:2_34:4	Triacylglyceride 20:2_34:4	Triglycerides	0.073	0.094	0.048	0.23	0.062	0.13	0.071	0.047	63	0.0726	30
TG 20:2_36:5	Triacylglyceride 20:2_36:5	Triglycerides	0.14	0.15	0.065	0.35	0.082	0.2	0.12	0.082	77	0.097	30
TG 20:3_32:0	Triacylglyceride 20:3_32:0	Triglycerides	0.63	0.85	0.17	2.9	0.38	1.1	0.68	0.69	100	0.0646	30
TG 20:3_32:1	Triacylglyceride 20:3_32:1	Triglycerides	0.74	0.97	0.15	3.2	0.48	1.1	0.58	0.73	100	0.0597	30
TG 20:3_32:2	Triacylglyceride 20:3_32:2	Triglycerides	0.43	0.48	0.17	1.1	0.32	0.6	0.28	0.27	93	0.069705	30
TG 20:3_34:0	Triacylglyceride 20:3_34:0	Triglycerides	0.56	0.7	0.24	1.7	0.37	0.96	0.59	0.44	97	0.045	30
TG 20:3_34:1	Triacylglyceride 20:3_34:1	Triglycerides	3.6	4.5	0.78	12	2.5	5.6	3.2	2.7	100	0.109	30
TG 20:3_34:2	Triacylglyceride 20:3_34:2	Triglycerides	3.2	3.8	0.89	10	2.4	4.9	2.5	2	100	0.032735	30
TG 20:3_34:3	Triacylglyceride 20:3_34:3	Triglycerides	0.76	0.87	0.23	2.2	0.6	1.1	0.54	0.42	100	0.207	30
TG 20:3_36:3	Triacylglyceride 20:3_36:3	Triglycerides	2.1	2.2	0.83	4.7	1.6	2.9	1.3	0.94	100	0.0939	30
TG 20:3_36:4	Triacylglyceride 20:3_36:4	Triglycerides	1.1	1.2	0.46	3	0.78	1.4	0.67	0.56	100	0.053755	30
TG 20:3_36:5	Triacylglyceride 20:3_36:5	Triglycerides	0.5	0.54	0.24	2	0.35	0.6	0.26	0.32	100	0.116	30
TG 20:4_30:0	Triacylglyceride 20:4_30:0	Triglycerides	0.53	0.81	0.13	3.2	0.34	1.1	0.77	0.73	87	0.062815	30
TG 20:4_32:0	Triacylglyceride 20:4_32:0	Triglycerides	1.9	2.5	0.46	7.2	1.3	3.6	2.3	1.8	100	0.0976	30
TG 20:4_32:1	Triacylglyceride 20:4_32:1	Triglycerides	1.9	2.4	0.38	6.3	1.2	3.2	2	1.6	100	0.0292	30
TG 20:4_32:2	Triacylglyceride 20:4_32:2	Triglycerides	0.86	1.1	0.23	3.1	0.58	1.4	0.81	0.7	100	0.209	30
TG 20:4_33:2	Triacylglyceride 20:4_33:2	Triglycerides	0.26	0.32	0.049	1.3	0.21	0.37	0.16	0.24	97	0.0695	30
TG 20:4_34:0	Triacylglyceride 20:4_34:0	Triglycerides	1.6	2	0.51	4.8	1.2	2.9	1.8	1.1	100	0.052835	30
TG 20:4_34:1	Triacylglyceride 20:4_34:1	Triglycerides	12	14	3.1	34	8.8	18	9.1	7.3	100	0.317	30
TG 20:4_34:2	Triacylglyceride 20:4_34:2	Triglycerides	10	12	2.6	24	7.8	16	7.7	5.6	100	0.02652	30
TG 20:4_34:3	Triacylglyceride 20:4_34:3	Triglycerides	2	2.2	0.62	6.5	1.3	3	1.7	1.2	100	2.4	30
TG 20:4_35:3	Triacylglyceride 20:4_35:3	Triglycerides	0.13	0.15	0.064	0.29	0.082	0.19	0.1	0.07	73	1.829	30
TG 20:4_36:2	Triacylglyceride 20:4_36:2	Triglycerides	9.2	11	3.7	24	7.3	13	5.7	4.7	100	0.638	30
TG 20:4_36:3	Triacylglyceride 20:4_36:3	Triglycerides	8.6	9.3	3.3	23	6.6	11	4.3	4.4	100	0.1358	30
TG 20:4_36:4	Triacylglyceride 20:4_36:4	Triglycerides	4.2	4.6	1.4	16	3.3	5.2	2	2.9	100	0.0528	30
TG 20:4_36:5	Triacylglyceride 20:4_36:5	Triglycerides	0.95	1.3	0.33	6.4	0.76	1.5	0.7	1.2	100	0.064385	30
TG 20:5_34:0	Triacylglyceride 20:5_34:0	Triglycerides	0.5	0.61	0.15	2.4	0.33	0.73	0.4	0.47	100	0.08757	30
TG 20:5_34:1	Triacylglyceride 20:5_34:1	Triglycerides	2.8	3.4	0.71	11	2.1	4.7	2.6	2	100	0.151	30
TG 20:5_34:2	Triacylglyceride 20:5_34:2	Triglycerides	2.6	2.9	0.79	7.1	1.7	4	2.3	1.6	100	0.179	30
TG 20:5_36:2	Triacylglyceride 20:5_36:2	Triglycerides	1.8	2.2	0.88	5.3	1.2	2.9	1.7	1.1	100	0.124	30
TG 20:5_36:3	Triacylglyceride 20:5_36:3	Triglycerides	2.1	2.4	0.85	5.2	1.4	3.2	1.7	1.2	100	0.117	30
TG 22:0_32:4	Triacylglyceride 22:0_32:4	Triglycerides	0.059	0.061	0.011	0.12	0.023	0.1	0.078	0.041	20	0.0639	30
TG 22:1_32:5	Triacylglyceride 22:1_32:5	Triglycerides	0.054	0.065	0.017	0.13	0.021	0.1	0.083	0.043	23	0.0503929	30
TG 22:2_32:4	Triacylglyceride 22:2_32:4	Triglycerides	0.033	0.038	0.008	0.073	0.011	0.068	0.057	0.027	20	0.039	30
TG 22:3_30:2	Triacylglyceride 22:3_30:2	Triglycerides	0.03	0.034	0.021	0.049	0.022	0.049	0.027	0.012	20	0.04003	30
TG 22:4_32:0	Triacylglyceride 22:4_32:0	Triglycerides	0.24	0.32	0.064	1	0.15	0.34	0.2	0.25	93	0.07104	30
TG 22:4_32:2	Triacylglyceride 22:4_32:2	Triglycerides	0.18	0.22	0.059	0.78	0.12	0.26	0.14	0.15	87	0.1105	30
TG 22:4_34:2	Triacylglyceride 22:4_34:2	Triglycerides	0.95	1.2	0.21	3.3	0.72	1.6	0.9	0.72	100	0.0876	30
TG 22:5_32:0	Triacylglyceride 22:5_32:0	Triglycerides	0.59	0.77	0.27	2	0.41	1	0.6	0.48	97	0.791	30
TG 22:5_32:1	Triacylglyceride 22:5_32:1	Triglycerides	0.64	0.82	0.16	2	0.49	1	0.52	0.51	100	0.775	30
TG 22:5_34:1	Triacylglyceride 22:5_34:1	Triglycerides	3.5	4.2	1.5	11	2.4	5.4	3.1	2.3	100	0.168	30
TG 22:5_34:2	Triacylglyceride 22:5_34:2	Triglycerides	3.6	4	1.5	9.2	2.4	4.8	2.4	2	100	0.071	30
TG 22:5_34:3	Triacylglyceride 22:5_34:3	Triglycerides	0.66	0.77	0.28	1.8	0.46	1	0.57	0.4	100	0.099	30
TG 22:6_32:0	Triacylglyceride 22:6_32:0	Triglycerides	1.3	1.6	0.18	4.2	0.85	2.2	1.4	1.1	100	0.08105	30
TG 22:6_32:1	Triacylglyceride 22:6_32:1	Triglycerides	1.2	1.7	0.2	4.5	1	2.3	1.3	1.1	100	0.072975	30
TG 22:6_34:1	Triacylglyceride 22:6_34:1	Triglycerides	8.1	9	1.5	25	4.9	11	6.3	5.8	100	0.126	30
TG 22:6_34:2	Triacylglyceride 22:6_34:2	Triglycerides	7	8.3	1.6	27	4.5	10	5.7	5.5	100	0.03057	30
TG 22:6_34:3	Triacylglyceride 22:6_34:3	Triglycerides	1.8	1.7	0.4	6.5	0.97	2.1	1.2	1.2	100	0.025	30
Hex3Cer d18:1/16:0	Trihexosylceramide d18:1/16:0	Trihexosylceramides	1.7	1.7	0.98	2.5	1.5	1.9	0.41	0.32	100	0.023	30
Hex3Cer d18:1/18:0	Trihexosylceramide d18:1/18:0	Trihexosylceramides	0.19	0.18	0.1	0.32	0.14	0.21	0.067	0.049	100	0.061	30
Hex3Cer d18:1/20:0	Trihexosylceramide d18:1/20:0	Trihexosylceramides	0.013	0.014	0.0075	0.022	0.011	0.017	0.0061	0.0049	20	0.158	30
Hex3Cer d18:1/22:0	Trihexosylceramide d18:1/22:0	Trihexosylceramides	0.17	0.19	0.082	0.35	0.16	0.24	0.08	0.063	100	0.01739	30
Hex3Cer d18:1/24:1	Trihexosylceramide d18:1/24:1	Trihexosylceramides	0.71	0.73	0.36	1.3	0.6	0.83	0.24	0.18	100	0.26	30
Hex3Cer d18:1/26:1	Trihexosylceramide d18:1/26:1	Trihexosylceramides	0.059	0.065	0.037	0.13	0.043	0.075	0.032	0.026	90	0.017	30
Choline	Choline	Vitamins and Cofactors	15	16	9.9	24	12	19	6.9	4.1	100	0.26	30
Disclaimer:
The reference ranges do not represent a diagnosis but serve as a means of comparison only. A reference range provides no statement about whether a person is sick or healthy.
Individuals with metabolite concentrations outside the range can therefore be healthy and individuals with metabolite concentrations in the reference range can be ill.

## Sheet: Black-female-70s
Quantitative metabolomics database (QMDB)
Selected matrix:	human plasma
Assay:	MxP® Quant 500
Age:	70 to 79
Gender:	f
Ethnicity:	Black or African American
Samples found matching the preferences	30
Short Name	Metabolite	Class	Median [µM]	Mean [µM]	Min [µM]	Max [µM]	1st quartile [µM]	3rd quartile [µM]	Interquartal range [µM]	Standard deviation	% of samples > LOD	Typical LOD [µM]	No of samples
C0	Carnitine	Acylcarnitines	43	43	23	63	38	47	9.5	8.9	100	1.5065	30
C2	Acetylcarnitine	Acylcarnitines	5.7	6	3.9	9.6	4.8	6.9	2.1	1.6	100	0.060515	30
C3	Propionylcarnitine	Acylcarnitines	0.36	0.36	0.23	0.55	0.31	0.41	0.11	0.076	100	0.098	30
C3-DC (C4-OH)	Malonylcarnitine (Hydroxybutyrylcarnitine)	Acylcarnitines			0.098	0.098					3.3	0.057	30
C3-OH	Hydroxypropionylcarnitine	Acylcarnitines									0	0.363	30
C3:1	Propenoylcarnitine	Acylcarnitines									0	0.0362	30
C4	Butyrylcarnitine	Acylcarnitines	0.2	0.2	0.091	0.41	0.15	0.24	0.092	0.065	100	0.0604	30
C4:1	Butenylcarnitine	Acylcarnitines									0	0.054	30
C5	Valerylcarnitine	Acylcarnitines	0.12	0.13	0.087	0.19	0.1	0.16	0.056	0.032	100	0.0504	30
C5-DC (C6-OH)	Glutarylcarnitine (Hydroxyhexanoylcarnitine)	Acylcarnitines									0	0.09628	30
C5-M-DC	Methylglutarylcarnitine	Acylcarnitines									0	0.06872	30
C5-OH (C3-DC-M)	Hydroxyvalerylcarnitine (Methylmalonylcarnitine)	Acylcarnitines									0	0.1	30
C5:1	Tiglylcarnitine	Acylcarnitines									0	0.04377	30
C5:1-DC	Glutaconylcarnitine	Acylcarnitines									0	0.0423541	30
C6 (C4:1-DC)	Hexanoylcarnitine (Fumarylcarnitine)	Acylcarnitines									0	0.153	30
C6:1	Hexenoylcarnitine	Acylcarnitines									0	0.09068	30
C7-DC	Pimelylcarnitine	Acylcarnitines									0	0.060255	30
C8	Octanoylcarnitine	Acylcarnitines	0.37	0.44	0.33	0.89	0.34	0.43	0.087	0.19	27	0.223	30
C9	Nonanoylcarnitine	Acylcarnitines									0	0.028	30
C10	Decanoylcarnitine	Acylcarnitines	0.32	0.37	0.2	1.1	0.27	0.44	0.17	0.18	90	0.1295	30
C10:1	Decenoylcarnitine	Acylcarnitines									0	0.4035	30
C10:2	Decadienoylcarnitine	Acylcarnitines									0	0.1085	30
C12	Dodecanoylcarnitine	Acylcarnitines	0.15	0.15	0.15	0.15	0.15	0.15	0.005	0.0026	13	0.072	30
C12-DC	Dodecanedioylcarnitine	Acylcarnitines									0	1.019	30
C12:1	Dodecenoylcarnitine	Acylcarnitines									0	0.109	30
C14	Tetradecanoylcarnitine	Acylcarnitines									0	0.0599	30
C14:1	Tetradecenoylcarnitine	Acylcarnitines	0.066	0.072	0.049	0.1	0.057	0.086	0.03	0.017	80	0.0349	30
C14:1-OH	Hydroxytetradecenoylcarnitine	Acylcarnitines									0	0.035385	30
C14:2	Tetradecadienoylcarnitine	Acylcarnitines									0	0.0322	30
C14:2-OH	Hydroxytetradecadienoylcarnitine	Acylcarnitines									0	0.031	30
C16	Hexadecanoylcarnitine	Acylcarnitines									0	0.088	30
C16-OH	Hydroxyhexadecanoylcarnitine	Acylcarnitines									0	0.077	30
C16:1	Hexadecenoylcarnitine	Acylcarnitines									0	0.05	30
C16:1-OH	Hydroxyhexadecenoylcarnitine	Acylcarnitines									0	0.039895	30
C16:2	Hexadecadienoylcarnitine	Acylcarnitines									0	0.02942	30
C16:2-OH	Hydroxyhexadecadienoylcarnitine	Acylcarnitines									0	0.041045	30
C18	Octadecanoylcarnitine	Acylcarnitines	0.07	0.078	0.067	0.099	0.067			0.018	10	0.02201	30
C18:1	Octadecenoylcarnitine	Acylcarnitines	0.19	0.19	0.15	0.26	0.16	0.22	0.064	0.037	67	0.082855	30
C18:1-OH	Hydroxyoctadecenoylcarnitine	Acylcarnitines									0	0.0687	30
C18:2	Octadecadienoylcarnitine	Acylcarnitines	0.088	0.093	0.041	0.17	0.071	0.1	0.034	0.029	97	0.0347	30
Trigonelline	Trigonelline	Alkaloids	0.6	0.98	0.061	6.7	0.26	1.1	0.84	1.4	100	0.042595	30
TMAO	Trimethylamine N-oxide	Amine Oxides	7.7	12	2.3	68	5.5	11	5.5	14	100	0.108	30
1-Met-His	1-Methylhistidine	Amino Acid Related	7.5	7.6	3.8	15	6.1	8.9	2.8	2.2	100	0.01	30
3-Met-His	3-Methylhistidine	Amino Acid Related	10	12	0.66	28	4.1	20	16	8.9	100	0.01	30
5-AVA	5-Aminovaleric acid	Amino Acid Related	0.062	0.072	0.04	0.14	0.051	0.088	0.037	0.028	60	0.04	30
AABA	alpha-Aminobutyric acid	Amino Acid Related	18	19	12	33	17	21	4.6	4.8	100	0.435	30
Ac-Orn	Acetylornithine	Amino Acid Related									0	0.065	30
ADMA	Asymmetric dimethylarginine	Amino Acid Related	0.6	0.59	0.44	0.77	0.51	0.65	0.14	0.093	100	0.08	30
alpha-AAA	alpha-Aminoadipic acid	Amino Acid Related	0.93	1	0.5	1.6	0.77	1.2	0.45	0.32	100	0.3	30
Anserine	L-Anserine	Amino Acid Related			0.018	0.018					3.3	0.01	30
BABA	beta-Aminobutyric acid	Amino Acid Related	0.059	0.069	0.052	0.097	0.052			0.024	10	0.03	30
Betaine	Betaine	Amino Acid Related	28	31	16	57	23	36	13	11	100	0.2	30
c4-OH-Pro	cis-4-Hydroxyproline	Amino Acid Related									0	0.3	30
Carnosine	Carnosine	Amino Acid Related									0	0.2	30
Cit	Citrulline	Amino Acid Related	43	45	20	81	36	51	15	13	100	1	30
Creatinine	Creatinine	Amino Acid Related	85	90	59	134	75	103	28	18	100	3.85	30
Cystine	Cystine	Amino Acid Related	50	50	11	89	41	59	18	15	100	0.07489	30
DOPA	Dihydroxyphenylalanine	Amino Acid Related									0	0.148	30
HArg	Homoarginine	Amino Acid Related	3.4	3.4	1.4	7.2	2.3	4.3	2	1.4	100	0.01	30
HCys	Homocysteine	Amino Acid Related	7.7	8	4.1	14	6.5	9.6	3.1	2.2	100	0.266	30
Kynurenine	Kynurenine	Amino Acid Related	2.2	2.3	1.5	3.7	1.9	2.5	0.61	0.5	100	0.2265	30
Met-SO	Methionine-Sulfoxide	Amino Acid Related	0.64	0.69	0.34	1.5	0.47	0.85	0.38	0.25	100	0.1	30
Nitro-Tyr	Nitrotyrosine	Amino Acid Related									0	0.3	30
Orn	Ornithine	Amino Acid Related	120	123	61	200	100	143	43	32	100	1	30
PAG	Phenylacetylglycine	Amino Acid Related									0	0.01	30
PheAlaBetaine	Phenylalanine betaine	Amino Acid Related	0.015	0.02	0.013	0.032	0.013			0.011	10	0.01	30
ProBetaine	Proline betaine	Amino Acid Related	5.6	10	0.71	73	2.2	13	11	14	100	0.061	30
Sarcosine	Sarcosine	Amino Acid Related	4	4.4	2.9	6.8	3.4	5.1	1.8	1.2	100	0.1855	30
SDMA	Symmetric dimethylarginine	Amino Acid Related	0.65	0.67	0.43	0.99	0.54	0.8	0.26	0.16	100	0.02	30
t4-OH-Pro	trans-4-Hydroxyproline	Amino Acid Related	15	15	6.6	36	10	17	6.6	6.5	100	0.382	30
Taurine	Taurine	Amino Acid Related	71	88	51	245	59	98	39	47	100	0.363	30
TrpBetaine	Tryptophan betaine	Amino Acid Related	0.53	0.63	0.025	2.2	0.24	0.77	0.53	0.57	97	0.00811	30
Ala	Alanine	Amino Acids	402	420	294	795	357	439	82	102	100	2.4075	30
Arg	Arginine	Amino Acids	69	73	40	163	52	84	32	28	100	0.987	30
Asn	Asparagine	Amino Acids	54	56	36	78	49	61	12	8.9	100	0.5225	30
Asp	Aspartic Acid	Amino Acids	10	10	6.1	18	8	11	3.2	2.7	100	1.0305	30
Cys	Cysteine	Amino Acids	82	86	64	174	73	91	18	22	100	0.1	30
Gln	Glutamine	Amino Acids	673	686	506	961	609	722	114	102	100	3.45	30
Glu	Glutamic Acid	Amino Acids	64	72	23	151	51	98	47	32	100	2.662	30
Gly	Glycine	Amino Acids	306	335	202	603	251	394	143	110	100	4.7	30
His	Histidine	Amino Acids	92	93	68	134	81	103	22	14	100	1.1	30
Ile	Isoleucine	Amino Acids	77	78	53	103	65	92	27	15	100	0.759	30
Leu	Leucine	Amino Acids	139	140	95	185	114	163	50	27	100	1.095	30
Lys	Lysine	Amino Acids	221	212	161	261	185	235	50	30	100	1.4	30
Met	Methionine	Amino Acids	30	30	21	45	25	34	8.4	6.4	100	0.8055	30
Phe	Phenylalanine	Amino Acids	68	69	52	88	60	75	15	10	100	0.8685	30
Pro	Proline	Amino Acids	179	197	135	339	157	234	77	52	100	2.07	30
Ser	Serine	Amino Acids	114	119	78	192	99	136	36	27	100	1.55	30
Thr	Threonine	Amino Acids	152	152	86	217	119	182	63	36	100	0.9225	30
Trp	Tryptophan	Amino Acids	62	61	41	86	51	71	20	12	100	0.792	30
Tyr	Tyrosine	Amino Acids	75	81	52	144	67	97	30	22	100	0.4925	30
Val	Valine	Amino Acids	243	241	178	303	204	271	67	38	100	1.048	30
CA	Cholic Acid	Bile Acids	0.039	0.1	0.013	0.45	0.023	0.18	0.16	0.12	80	0.003	30
CDCA	Chenodeoxycholic acid	Bile Acids	0.16	0.2	0.029	0.52	0.081	0.29	0.21	0.15	60	0.02	30
DCA	Deoxycholic acid	Bile Acids	0.46	0.47	0.051	1.4	0.19	0.6	0.41	0.31	100	0.0081	30
GCA	Glycocholic acid	Bile Acids	0.13	0.23	0.014	1.2	0.09	0.3	0.21	0.26	100	0.00429	30
GCDCA	Glycochenodeoxycholic acid	Bile Acids	0.34	0.48	0.075	1.5	0.18	0.7	0.52	0.39	100	0.002	30
GDCA	Glycodeoxycholic acid	Bile Acids	0.28	0.49	0.056	3	0.16	0.57	0.41	0.67	100	0.0016736	30
GLCA	Glycolithocholic acid	Bile Acids	0.014	0.031	0.006	0.26	0.0097	0.024	0.015	0.054	77	0.003565	30
GLCAS	Glycolithocholic acid sulfate	Bile Acids	0.28	0.36	0.041	1.2	0.17	0.47	0.31	0.26	100	0.0034	30
GUDCA	Glycoursodeoxycholic acid	Bile Acids	0.064	0.57	0.013	13	0.042	0.18	0.14	2.4	97	0.0019	30
TCA	Taurocholic acid	Bile Acids	0.028	0.064	0.0059	0.33	0.022	0.075	0.053	0.078	87	0.005	30
TCDCA	Taurochenodeoxycholic acid	Bile Acids	0.078	0.13	0.012	1.1	0.041	0.13	0.092	0.2	97	0.004085	30
TDCA	Taurodeoxycholic acid	Bile Acids	0.055	0.093	0.0065	0.55	0.034	0.12	0.091	0.11	100	0.004	30
TLCA	Taurolithocholic acid	Bile Acids	0.0043	0.0067	0.002	0.02	0.0025	0.0094	0.0068	0.0057	33	0.002	30
TMCA	Tauro-muricholic acids	Bile Acids	0.011	0.013	0.0023	0.068	0.0044	0.018	0.013	0.014	73	0.002	30
beta-Ala	beta-Alanine	Biogenic Amines	2.9	3	1.8	6	2.2	3.6	1.4	0.98	100	0.11	30
Dopamine	Dopamine	Biogenic Amines									0	0.2315	30
GABA	gamma-Aminobutyric acid	Biogenic Amines	0.19	0.2	0.13	0.39	0.16	0.23	0.067	0.053	100	0.04652	30
Histamine	Histamine	Biogenic Amines									0	0.429	30
PEA	Phenylethylamine	Biogenic Amines									0	0.001	30
Putrescine	Putrescine	Biogenic Amines	0.14	0.14	0.079	0.3	0.1	0.17	0.064	0.051	70	0.0624	30
Serotonin	Serotonin	Biogenic Amines	0.41	0.51	0.051	1.8	0.085	0.71	0.62	0.5	43	0.04	30
Spermidine	Spermidine	Biogenic Amines	0.28	0.33	0.26	0.45	0.27	0.42	0.15	0.086	17	0.2	30
Spermine	Spermine	Biogenic Amines	0.26	0.25	0.24	0.27	0.24			0.015	10	0.2	30
Hexose	Hexose	Carbohydrates and Related	4942	5147	3482	9190	4417	5591	1175	1144	100	88.1885	30
AconAcid	Aconitic acid	Carboxylic Acids	14	15	9.3	26	12	16	4	4	100	0.2667	30
DiCA(12:0)	Dodecanedioic acid	Carboxylic Acids									0	0.1595	30
DiCA(14:0)	Tetradecanedioic acid	Carboxylic Acids									0	0.09969	30
HipAcid	Hippuric acid	Carboxylic Acids	6.4	11	1.5	69	3.7	16	13	13	93	0.5	30
Lac	Lactic acid	Carboxylic Acids	4564	4609	2118	8921	3429	5331	1902	1402	100	143.401	30
OH-GlutAcid	Hydroxyglutaric acid	Carboxylic Acids									0	6.942	30
Suc	Succinic acid	Carboxylic Acids									0	20.851	30
Cer d16:1/18:0	Ceramide d16:1/18:0	Ceramides	0.1	0.11	0.056	0.18	0.078	0.14	0.064	0.038	47	0.025875	30
Cer d16:1/20:0	Ceramide d16:1/20:0	Ceramides	0.11	0.12	0.062	0.25	0.083	0.14	0.052	0.047	100	0.01891	30
Cer d16:1/22:0	Ceramide d16:1/22:0	Ceramides	0.37	0.4	0.16	0.78	0.24	0.51	0.27	0.16	100	0.0694	30
Cer d16:1/23:0	Ceramide d16:1/23:0	Ceramides	0.17	0.18	0.081	0.34	0.12	0.23	0.11	0.068	100	0.033	30
Cer d16:1/24:0	Ceramide d16:1/24:0	Ceramides	0.26	0.27	0.1	0.54	0.16	0.36	0.2	0.12	100	0.01336	30
Cer d18:1/14:0	Ceramide d18:1/14:0	Ceramides	0.09	0.094	0.077	0.13	0.083	0.1	0.021	0.017	37	0.04241	30
Cer d18:1/16:0	Ceramide d18:1/16:0	Ceramides	0.49	0.53	0.37	0.91	0.44	0.59	0.15	0.13	100	0.011415	30
Cer d18:1/18:0	Ceramide d18:1/18:0	Ceramides	0.21	0.22	0.12	0.48	0.17	0.25	0.077	0.075	100	0.00978	30
Cer d18:1/18:0-OH	Ceramide d18:1/18:0-OH	Ceramides			0.66	0.66					3.3	0.2945	30
Cer d18:1/18:1	Ceramide d18:1/18:1	Ceramides	0.047	0.047	0.041	0.053				0.0086	6.7	0.0271351	30
Cer d18:1/20:0	Ceramide d18:1/20:0	Ceramides	0.15	0.17	0.1	0.4	0.13	0.18	0.052	0.055	100	0.007175	30
Cer d18:1/20:0-OH	Ceramide d18:1/20:0-OH	Ceramides	0.68	0.7	0.61	0.87	0.65	0.75	0.11	0.084	33	0.239	30
Cer d18:1/22:0	Ceramide d18:1/22:0	Ceramides	0.94	1	0.62	1.7	0.74	1.2	0.46	0.3	100	0.010545	30
Cer d18:1/23:0	Ceramide d18:1/23:0	Ceramides	1	1.1	0.61	2.1	0.82	1.3	0.45	0.37	100	0.012515	30
Cer d18:1/24:0	Ceramide d18:1/24:0	Ceramides	2.7	2.9	1.3	4.7	2.1	3.6	1.6	0.97	100	0.02399	30
Cer d18:1/24:1	Ceramide d18:1/24:1	Ceramides	1.2	1.3	0.84	2.4	1	1.6	0.52	0.36	100	0.011975	30
Cer d18:1/25:0	Ceramide d18:1/25:0	Ceramides	0.55	0.55	0.23	1	0.42	0.63	0.2	0.17	100	0.066815	30
Cer d18:1/26:0	Ceramide d18:1/26:0	Ceramides	0.11	0.13	0.059	0.27	0.091	0.16	0.07	0.053	100	0.024	30
Cer d18:1/26:1	Ceramide d18:1/26:1	Ceramides	0.032	0.035	0.016	0.09	0.025	0.045	0.02	0.015	93	0.0119	30
Cer d18:2/14:0	Ceramide d18:2/14:0	Ceramides									0	0.01116	30
Cer d18:2/16:0	Ceramide d18:2/16:0	Ceramides	0.13	0.14	0.059	0.25	0.11	0.15	0.042	0.039	100	0.049	30
Cer d18:2/18:0	Ceramide d18:2/18:0	Ceramides	0.1	0.11	0.042	0.22	0.085	0.12	0.04	0.041	100	0.029	30
Cer d18:2/18:1	Ceramide d18:2/18:1	Ceramides									0	0.01462	30
Cer d18:2/20:0	Ceramide d18:2/20:0	Ceramides	0.085	0.089	0.046	0.15	0.068	0.1	0.035	0.027	100	0.025	30
Cer d18:2/22:0	Ceramide d18:2/22:0	Ceramides	0.31	0.35	0.2	0.61	0.26	0.45	0.19	0.12	100	0.011245	30
Cer d18:2/23:0	Ceramide d18:2/23:0	Ceramides	0.15	0.17	0.097	0.32	0.12	0.21	0.088	0.061	100	0.041	30
Cer d18:2/24:0	Ceramide d18:2/24:0	Ceramides	0.56	0.65	0.32	1.2	0.46	0.9	0.44	0.26	100	0.00689	30
Cer d18:2/24:1	Ceramide d18:2/24:1	Ceramides	0.26	0.27	0.17	0.47	0.21	0.33	0.12	0.079	100	0.005	30
CE 14:0	Cholesteryl ester 14:0	Cholesteryl Esters	12	13	3.1	26	9.1	18	9.1	5.8	100	0.3075	30
CE 14:1	Cholesteryl ester 14:1	Cholesteryl Esters									0	0.144	30
CE 15:0	Cholesteryl ester 15:0	Cholesteryl Esters	5.3	5.3	2	8.9	4.3	6.3	2	1.6	100	1.39	30
CE 15:1	Cholesteryl ester 15:1	Cholesteryl Esters									0	0.507	30
CE 16:0	Cholesteryl ester 16:0	Cholesteryl Esters	179	187	137	298	156	209	53	42	100	0.938	30
CE 16:1	Cholesteryl ester 16:1	Cholesteryl Esters	34	35	10	71	23	45	22	14	100	9.92	30
CE 17:0	Cholesteryl ester 17:0	Cholesteryl Esters	4.9	5.1	2.7	8.4	4.2	5.8	1.6	1.2	100	1.25	30
CE 17:1	Cholesteryl ester 17:1	Cholesteryl Esters	2.6	2.9	1.3	5.6	2	3.3	1.2	1.1	97	1.06	30
CE 18:0	Cholesteryl ester 18:0	Cholesteryl Esters	12	12	8.1	20	10	14	3.4	3	100	0.29215	30
CE 18:1	Cholesteryl ester 18:1	Cholesteryl Esters	230	250	174	433	208	300	91	57	100	1.3125	30
CE 18:2	Cholesteryl ester 18:2	Cholesteryl Esters	1214	1312	760	2581	1043	1548	505	412	100	14.28	30
CE 18:3	Cholesteryl ester 18:3	Cholesteryl Esters	44	54	21	105	37	68	30	22	100	0.226	30
CE 20:0	Cholesteryl ester 20:0	Cholesteryl Esters									0	4.413	30
CE 20:1	Cholesteryl ester 20:1	Cholesteryl Esters	2.1	2.3	1.9	3.5	1.9	2.8	0.89	0.69	17	0.618	30
CE 20:3	Cholesteryl ester 20:3	Cholesteryl Esters	19	19	8.7	39	15	23	7.8	6.7	100	0.183	30
CE 20:4	Cholesteryl ester 20:4	Cholesteryl Esters	297	292	143	509	242	331	89	77	100	0.549	30
CE 20:5	Cholesteryl ester 20:5	Cholesteryl Esters	67	74	11	174	48	86	38	39	100	0.4255	30
CE 22:0	Cholesteryl ester 22:0	Cholesteryl Esters									0	0.108	30
CE 22:1	Cholesteryl ester 22:1	Cholesteryl Esters									0	0.147	30
CE 22:2	Cholesteryl ester 22:2	Cholesteryl Esters	0.99	1.2	0.68	1.9	0.68			0.61	10	0.169	30
CE 22:5	Cholesteryl ester 22:5	Cholesteryl Esters	2.5	2.6	1.7	5	2	3	1	0.83	100	0.88	30
CE 22:6	Cholesteryl ester 22:6	Cholesteryl Esters	50	52	19	99	42	61	19	17	100	0.3	30
p-Cresol-SO4	p-Cresol sulfate	Cresols	57	56	6.6	121	45	65	20	20	100	0.01	30
DG 14:0_14:0	Diacylglyceride 14:0_14:0	Diglycerides									0	0.3475	30
DG 14:0_18:1	Diacylglyceride 14:0_18:1	Diglycerides									0	0.6975	30
DG 14:0_18:2	Diacylglyceride 14:0_18:2	Diglycerides									0	0.334	30
DG 14:0_20:0	Diacylglyceride 14:0_20:0	Diglycerides									0	0.0698	30
DG 14:1_18:1	Diacylglyceride 14:1_18:1	Diglycerides			0.23	0.23					3.3	0.09721	30
DG 14:1_20:2	Diacylglyceride 14:1_20:2	Diglycerides									0	0.1135	30
DG 16:0_16:0	Diacylglyceride 16:0_16:0	Diglycerides									0	23.3	30
DG 16:0_16:1	Diacylglyceride 16:0_16:1	Diglycerides									0	0.2565	30
DG 16:0_18:1	Diacylglyceride 16:0_18:1	Diglycerides	2	2.5	1.2	6.7	1.7	3.3	1.6	1.2	87	0.573	30
DG 16:0_18:2	Diacylglyceride 16:0_18:2	Diglycerides	1.3	1.6	0.61	4.6	1	2	1	0.84	100	0.48	30
DG 16:0_20:0	Diacylglyceride 16:0_20:0	Diglycerides									0	0.9455	30
DG 16:0_20:3	Diacylglyceride 16:0_20:3	Diglycerides									0	0.1155	30
DG 16:0_20:4	Diacylglyceride 16:0_20:4	Diglycerides									0	0.189	30
DG 16:1_18:0	Diacylglyceride 16:1_18:0	Diglycerides									0	0.125	30
DG 16:1_18:1	Diacylglyceride 16:1_18:1	Diglycerides	1.3	1.3	1.2	1.6	1.2	1.6	0.32	0.17	23	0.4415	30
DG 16:1_18:2	Diacylglyceride 16:1_18:2	Diglycerides	0.46	0.49	0.22	0.93	0.35	0.56	0.22	0.19	100	0.151	30
DG 16:1_20:0	Diacylglyceride 16:1_20:0	Diglycerides			1.3	1.3					3.3	0.234	30
DG 17:0_17:1	Diacylglyceride 17:0_17:1	Diglycerides									0	0.107	30
DG 17:0_18:1	Diacylglyceride 17:0_18:1	Diglycerides	0.48	0.54	0.29	1.3	0.42	0.6	0.18	0.2	100	0.188	30
DG 18:0_20:0	Diacylglyceride 18:0_20:0	Diglycerides									0	0.417	30
DG 18:0_20:4	Diacylglyceride 18:0_20:4	Diglycerides									0	0.1225	30
DG 18:1_18:1	Diacylglyceride 18:1_18:1	Diglycerides	2.3	2.3	1.1	5.6	1.5	2.9	1.3	0.98	100	0.516	30
DG 18:1_18:2	Diacylglyceride 18:1_18:2	Diglycerides	5.9	6.6	2.9	14	4.9	7.8	2.9	2.5	100	1.63	30
DG 18:1_18:3	Diacylglyceride 18:1_18:3	Diglycerides	0.99	0.99	0.98	1	0.98			0.012	10	0.339	30
DG 18:1_18:4	Diacylglyceride 18:1_18:4	Diglycerides									0	0.17015	30
DG 18:1_20:0	Diacylglyceride 18:1_20:0	Diglycerides			0.63	0.63					3.3	0.271	30
DG 18:1_20:1	Diacylglyceride 18:1_20:1	Diglycerides									0	0.0322042	30
DG 18:1_20:2	Diacylglyceride 18:1_20:2	Diglycerides									0	0.119	30
DG 18:1_20:3	Diacylglyceride 18:1_20:3	Diglycerides									0	0.07755	30
DG 18:1_20:4	Diacylglyceride 18:1_20:4	Diglycerides			0.51	0.51					3.3	0.185	30
DG 18:1_22:5	Diacylglyceride 18:1_22:5	Diglycerides									0	0.0133982	30
DG 18:1_22:6	Diacylglyceride 18:1_22:6	Diglycerides									0	0.29595	30
DG 18:2_18:2	Diacylglyceride 18:2_18:2	Diglycerides	4.1	4.6	1.5	12	3.1	5.9	2.7	2.3	100	0.605	30
DG 18:2_18:3	Diacylglyceride 18:2_18:3	Diglycerides	0.47	0.49	0.28	0.99	0.34	0.58	0.25	0.17	80	0.152	30
DG 18:2_18:4	Diacylglyceride 18:2_18:4	Diglycerides									0	0.1419	30
DG 18:2_20:0	Diacylglyceride 18:2_20:0	Diglycerides			0.3	0.3					3.3	0.122	30
DG 18:2_20:4	Diacylglyceride 18:2_20:4	Diglycerides									0	0.1805	30
DG 18:3_18:3	Diacylglyceride 18:3_18:3	Diglycerides									0	0.1605	30
DG 18:3_20:2	Diacylglyceride 18:3_20:2	Diglycerides									0	0.176	30
DG 21:0_22:6	Diacylglyceride 21:0_22:6	Diglycerides									0	0.407	30
DG 22:1_22:2	Diacylglyceride 22:1_22:2	Diglycerides									0	0.1235	30
DG O-14:0_18:2	Diacylglyceride O-14:0_18:2	Diglycerides									0	0.804	30
DG O-16:0_18:1	Diacylglyceride O-16:0_18:1	Diglycerides			0.77	0.77					3.3	0.1255	30
DG O-16:0_20:4	Diacylglyceride O-16:0_20:4	Diglycerides									0	0.0461062	30
Hex2Cer d18:1/14:0	Dihexosylceramide d18:1/14:0	Dihexosylceramides	0.26	0.27	0.12	0.52	0.2	0.34	0.14	0.092	100	0.0829	30
Hex2Cer d18:1/16:0	Dihexosylceramide d18:1/16:0	Dihexosylceramides	2.8	3.1	1.8	5.7	2.4	3.6	1.2	0.92	100	0.0259557	30
Hex2Cer d18:1/18:0	Dihexosylceramide d18:1/18:0	Dihexosylceramides	0.29	0.29	0.15	0.49	0.26	0.33	0.076	0.066	100	0.01082	30
Hex2Cer d18:1/20:0	Dihexosylceramide d18:1/20:0	Dihexosylceramides	0.15	0.16	0.092	0.24	0.14	0.19	0.053	0.036	100	0.0339	30
Hex2Cer d18:1/22:0	Dihexosylceramide d18:1/22:0	Dihexosylceramides	0.33	0.35	0.16	0.61	0.27	0.39	0.12	0.11	100	0.105	30
Hex2Cer d18:1/24:0	Dihexosylceramide d18:1/24:0	Dihexosylceramides	0.28	0.27	0.13	0.47	0.2	0.33	0.13	0.086	100	0.077	30
Hex2Cer d18:1/24:1	Dihexosylceramide d18:1/24:1	Dihexosylceramides	0.46	0.48	0.23	0.92	0.35	0.55	0.19	0.16	100	0.133	30
Hex2Cer d18:1/26:0	Dihexosylceramide d18:1/26:0	Dihexosylceramides									0	0.003615	30
Hex2Cer d18:1/26:1	Dihexosylceramide d18:1/26:1	Dihexosylceramides			0.019	0.019					3.3	0.006	30
Cer d18:0/18:0	Dihydroceramide d18:0/18:0	Dihydroceramides									0	0.00583	30
Cer d18:0/18:0-OH	Dihydroceramide d18:0/18:0-OH	Dihydroceramides									0	0.606	30
Cer d18:0/20:0	Dihydroceramide d18:0/20:0	Dihydroceramides									0	0.03455	30
Cer d18:0/22:0	Dihydroceramide d18:0/22:0	Dihydroceramides	0.38	0.41	0.33	0.54	0.34	0.51	0.17	0.088	17	0.07019	30
Cer d18:0/24:0	Dihydroceramide d18:0/24:0	Dihydroceramides	0.33	0.38	0.18	1.1	0.24	0.5	0.27	0.2	100	0.097	30
Cer d18:0/24:1	Dihydroceramide d18:0/24:1	Dihydroceramides	0.27	0.31	0.16	0.72	0.22	0.37	0.15	0.12	100	0.093	30
Cer d18:0/26:1	Dihydroceramide d18:0/26:1	Dihydroceramides									0	0.035385	30
Cer d18:0/26:1-OH	Dihydroceramide d18:0/26:1-OH	Dihydroceramides									0	0.402	30
FA 12:0	Dodecanoic acid	Fatty Acids			28	28					3.3	16.493	30
FA 14:0	Myristic acid	Fatty Acids									0	228.567	30
FA 16:0	Palmitic acid	Fatty Acids									0	738.192	30
FA 18:0	Stearic acid	Fatty Acids									0	690.389	30
FA 18:1	Octadecenoic acid	Fatty Acids	212	215	95	337	176	260	84	65	100	64	30
FA 18:2	Octadecadienoic acid	Fatty Acids	57	58	14	102	44	71	27	22	100	3.4155	30
FA 20:1	Eicosenoic acid	Fatty Acids	2.1	2.3	0.98	3.5	1.7	3	1.3	0.8	100	0.515	30
FA 20:2	Eicosadienoic acid	Fatty Acids	1.8	1.9	0.49	3.6	1.4	2.3	0.89	0.83	100	0.6955	30
FA 20:3	Eicosatrienoic acid	Fatty Acids	0.76	0.77	0.3	1.5	0.49	0.93	0.43	0.32	93	0.25	30
FA 20:4	Arachidonic acid	Fatty Acids	5.5	5.5	2.5	9.4	3.6	6.9	3.4	2	60	0.8	30
FA 20:5	Eicosapentaenoic acid	Fatty Acids	0.6	0.74	0.23	1.8	0.47	0.91	0.44	0.39	97	0.117	30
FA 22:6	Docosahexaenoic acid	Fatty Acids	7.5	8.5	3.5	16	6.4	11	4.3	3.1	100	1.681	30
Hex-Cer d16:1/22:0	Hexosylceramide d16:1/22:0	Hexosylceramides	0.05	0.052	0.024	0.085	0.035	0.067	0.032	0.017	100	0.0123	30
Hex-Cer d16:1/24:0	Hexosylceramide d16:1/24:0	Hexosylceramides	0.041	0.045	0.024	0.076	0.034	0.06	0.026	0.015	80	0.017	30
Hex-Cer d18:1/14:0	Hexosylceramide d18:1/14:0	Hexosylceramides			0.067	0.067					3.3	0.0148	30
Hex-Cer d18:1/16:0	Hexosylceramide d18:1/16:0	Hexosylceramides	1.2	1.3	0.91	2.1	1	1.5	0.49	0.31	100	0.02585	30
Hex-Cer d18:1/18:0	Hexosylceramide d18:1/18:0	Hexosylceramides	0.21	0.23	0.14	0.45	0.18	0.24	0.057	0.063	100	0.0198	30
Hex-Cer d18:1/18:1	Hexosylceramide d18:1/18:1	Hexosylceramides	0.1	0.12	0.07	0.23	0.087	0.14	0.053	0.041	100	0.0707	30
Hex-Cer d18:1/20:0	Hexosylceramide d18:1/20:0	Hexosylceramides	0.33	0.33	0.2	0.48	0.28	0.38	0.1	0.071	100	0.0319	30
Hex-Cer d18:1/22:0	Hexosylceramide d18:1/22:0	Hexosylceramides	3.4	3.4	1.9	5.3	2.6	4.2	1.6	0.98	100	0.103	30
Hex-Cer d18:1/23:0	Hexosylceramide d18:1/23:0	Hexosylceramides	1.6	1.7	0.9	2.6	1.3	2.1	0.78	0.51	100	0.03776	30
Hex-Cer d18:1/24:0	Hexosylceramide d18:1/24:0	Hexosylceramides	1.8	1.8	1.1	2.9	1.4	2.3	0.9	0.54	100	0.03923	30
Hex-Cer d18:1/24:1	Hexosylceramide d18:1/24:1	Hexosylceramides	4.1	4.3	2.5	7.6	3.6	4.8	1.2	1.2	100	0.023905	30
Hex-Cer d18:1/26:0	Hexosylceramide d18:1/26:0	Hexosylceramides	0.095	0.1	0.077	0.16	0.084	0.11	0.028	0.023	53	0.1495	30
Hex-Cer d18:1/26:1	Hexosylceramide d18:1/26:1	Hexosylceramides	0.15	0.16	0.12	0.2	0.13	0.17	0.04	0.025	27	0.03788	30
Hex-Cer d18:2/16:0	Hexosylceramide d18:2/16:0	Hexosylceramides									0	0.050635	30
Hex-Cer d18:2/18:0	Hexosylceramide d18:2/18:0	Hexosylceramides	0.034	0.036	0.02	0.057	0.028	0.043	0.015	0.0099	97	0.009915	30
Hex-Cer d18:2/20:0	Hexosylceramide d18:2/20:0	Hexosylceramides			0.052	0.052					3.3	0.01368	30
Hex-Cer d18:2/22:0	Hexosylceramide d18:2/22:0	Hexosylceramides	0.81	0.85	0.35	1.6	0.66	1	0.35	0.28	100	0.014665	30
Hex-Cer d18:2/23:0	Hexosylceramide d18:2/23:0	Hexosylceramides	0.41	0.41	0.19	0.67	0.32	0.49	0.17	0.13	100	0.176	30
Hex-Cer d18:2/24:0	Hexosylceramide d18:2/24:0	Hexosylceramides	0.97	1	0.53	1.8	0.71	1.3	0.55	0.34	100	0.0856	30
AbsAcid	Abscisic acid	Hormones and Related									0	0.333	30
Cortisol	Cortisol	Hormones and Related	0.28	0.31	0.13	0.66	0.23	0.38	0.15	0.12	100	0.01	30
Cortisone	Cortisone	Hormones and Related	0.089	0.089	0.082	0.096	0.083	0.094	0.011	0.0054	33	0.05813	30
DHEAS	Dehydroepiandrosterone sulfate	Hormones and Related	1	1.1	0.16	2.8	0.64	1.4	0.73	0.61	100	0.06498	30
3-IAA	Indoleacetic acid	Indoles and Derivatives	2.3	2.7	1.3	10	1.8	3.1	1.3	1.7	100	0.0851258	30
3-IPA	Indolepropionic acid	Indoles and Derivatives	0.52	0.69	0.2	1.9	0.37	0.95	0.57	0.44	97	0.018	30
Indole	Indole	Indoles and Derivatives									0	0.0110957	30
Ind-SO4	Indoxyl sulfate	Indoles and Derivatives	10	9.5	2.1	18	6.1	12	5.9	4.4	100	0.0625	30
LPC 14:0	Lysophosphatidylcholine 14:0	Lysophosphatidylcholines									0	78	30
LPC 16:0	Lysophosphatidylcholine 16:0	Lysophosphatidylcholines	101	104	63	140	89	120	31	20	100	12.1905	30
LPC 16:1	Lysophosphatidylcholine 16:1	Lysophosphatidylcholines	2.5	2.5	1.2	4.6	2	2.9	0.92	0.67	100	0.2525	30
LPC 17:0	Lysophosphatidylcholine 17:0	Lysophosphatidylcholines	2.1	2.1	1.2	3	1.7	2.4	0.71	0.48	100	0.079	30
LPC 18:0	Lysophosphatidylcholine 18:0	Lysophosphatidylcholines	35	36	17	56	31	42	11	8.4	100	0.04279	30
LPC 18:1	Lysophosphatidylcholine 18:1	Lysophosphatidylcholines	20	21	11	31	16	25	9.2	5.8	100	0.4095	30
LPC 18:2	Lysophosphatidylcholine 18:2	Lysophosphatidylcholines	34	35	13	66	27	44	17	14	100	0.142	30
LPC 20:3	Lysophosphatidylcholine 20:3	Lysophosphatidylcholines	1.8	1.9	0.73	3.4	1.4	2.3	0.89	0.65	100	0.214	30
LPC 20:4	Lysophosphatidylcholine 20:4	Lysophosphatidylcholines	8.6	8.4	3.7	12	6.9	10	3.3	2.1	100	0.156	30
LPC 24:0	Lysophosphatidylcholine 24:0	Lysophosphatidylcholines	0.16	0.17	0.083	0.47	0.12	0.21	0.091	0.078	100	0.058535	30
LPC 26:0	Lysophosphatidylcholine 26:0	Lysophosphatidylcholines	0.17	0.21	0.13	0.6	0.15	0.22	0.068	0.11	70	0.0727	30
LPC 26:1	Lysophosphatidylcholine 26:1	Lysophosphatidylcholines	0.18	0.2	0.093	0.48	0.14	0.22	0.084	0.087	97	0.0895	30
Hypoxanthine	Hypoxanthine	Nucleobases and Related	2.7	3.3	0.59	9.4	2.1	4.3	2.1	2.1	90	0.13	30
Xanthine	Xanthine	Nucleobases and Related	0.66	0.71	0.56	1.1	0.57	0.78	0.21	0.16	50	0.495	30
PC 24:0	Phosphatidylcholine 24:0	Phosphatidylcholines	0.11	0.16	0.1	0.3	0.11	0.25	0.14	0.084	20	0.4	30
PC 26:0	Phosphatidylcholine 26:0	Phosphatidylcholines			1.5	1.5					3.3	0.03922	30
PC 28:1	Phosphatidylcholine 28:1	Phosphatidylcholines	3.5	3.7	1.7	6	2.9	4.4	1.6	1.1	100	0.8725	30
PC 30:0	Phosphatidylcholine 30:0	Phosphatidylcholines	3.2	3.4	1.4	7.2	2.4	4.1	1.6	1.3	100	0.03336	30
PC 30:2	Phosphatidylcholine 30:2	Phosphatidylcholines			0.11	0.11					3.3	0.122	30
PC 32:0	Phosphatidylcholine 32:0	Phosphatidylcholines	12	13	7.5	19	10	15	4.9	3.2	100	0.02949	30
PC 32:1	Phosphatidylcholine 32:1	Phosphatidylcholines	6.9	7.7	2.5	16	5.6	9.5	3.8	3.1	100	0.0151042	30
PC 32:2	Phosphatidylcholine 32:2	Phosphatidylcholines	2.8	3.7	1.1	11	2	4.2	2.2	2.5	83	0.48	30
PC 32:3	Phosphatidylcholine 32:3	Phosphatidylcholines	0.66	0.68	0.28	1.4	0.56	0.81	0.25	0.22	100	0.00633	30
PC 34:1	Phosphatidylcholine 34:1	Phosphatidylcholines	135	149	91	225	121	177	57	40	100	0.096345	30
PC 34:2	Phosphatidylcholine 34:2	Phosphatidylcholines	321	333	201	525	274	377	103	83	100	0.174	30
PC 34:3	Phosphatidylcholine 34:3	Phosphatidylcholines	12	14	6.7	26	9.4	18	8.5	5.3	100	0.061205	30
PC 34:4	Phosphatidylcholine 34:4	Phosphatidylcholines	1.8	1.8	0.94	2.9	1.2	2.3	1.1	0.57	100	0.0141726	30
PC 36:0	Phosphatidylcholine 36:0	Phosphatidylcholines	1.8	1.8	0.9	3.3	1.4	2.3	0.93	0.59	100	0.282	30
PC 36:1	Phosphatidylcholine 36:1	Phosphatidylcholines	38	40	26	65	32	48	17	11	100	0.04206	30
PC 36:2	Phosphatidylcholine 36:2	Phosphatidylcholines	205	217	128	357	164	256	92	63	100	0.1185	30
PC 36:3	Phosphatidylcholine 36:3	Phosphatidylcholines	98	108	58	195	81	121	41	35	100	0.05691	30
PC 36:4	Phosphatidylcholine 36:4	Phosphatidylcholines	192	193	105	293	158	228	70	46	100	0.083375	30
PC 36:5	Phosphatidylcholine 36:5	Phosphatidylcholines	21	23	6.7	45	15	30	15	10	100	0.027775	30
PC 36:6	Phosphatidylcholine 36:6	Phosphatidylcholines	0.92	0.93	0.38	1.7	0.69	1.2	0.5	0.32	100	0.00875	30
PC 38:0	Phosphatidylcholine 38:0	Phosphatidylcholines	3.4	3.3	2	6.2	2.8	3.8	1	0.84	100	0.97	30
PC 38:1	Phosphatidylcholine 38:1	Phosphatidylcholines	0.71	0.79	0.27	2.3	0.44	1	0.58	0.47	100	0.03304	30
PC 38:3	Phosphatidylcholine 38:3	Phosphatidylcholines	38	40	21	76	30	46	15	13	100	0.05754	30
PC 38:4	Phosphatidylcholine 38:4	Phosphatidylcholines	118	124	71	207	101	151	50	34	100	0.0385	30
PC 38:5	Phosphatidylcholine 38:5	Phosphatidylcholines	48	50	27	90	43	54	11	12	100	0.035	30
PC 38:6	Phosphatidylcholine 38:6	Phosphatidylcholines	80	77	39	128	60	87	27	21	100	0.4305	30
PC 40:1	Phosphatidylcholine 40:1	Phosphatidylcholines	0.52	0.52	0.47	0.6	0.49	0.55	0.061	0.044	20	0.016525	30
PC 40:2	Phosphatidylcholine 40:2	Phosphatidylcholines	0.24	0.26	0.15	0.4	0.21	0.29	0.081	0.063	100	0.19	30
PC 40:3	Phosphatidylcholine 40:3	Phosphatidylcholines	0.41	0.43	0.25	0.64	0.35	0.5	0.16	0.1	100	0.0192925	30
PC 40:4	Phosphatidylcholine 40:4	Phosphatidylcholines	2.5	2.7	1.4	4.6	2.1	3.1	1	0.84	100	0.033	30
PC 40:5	Phosphatidylcholine 40:5	Phosphatidylcholines	7.1	7.4	4.4	14	5.7	8.2	2.5	2.4	100	0.219	30
PC 40:6	Phosphatidylcholine 40:6	Phosphatidylcholines	24	27	15	47	21	32	12	8.3	100	0.0424	30
PC 42:0	Phosphatidylcholine 42:0	Phosphatidylcholines	0.49	0.53	0.26	1.3	0.43	0.63	0.2	0.19	100	0.01122	30
PC 42:1	Phosphatidylcholine 42:1	Phosphatidylcholines	0.3	0.31	0.14	0.63	0.24	0.35	0.1	0.099	100	0.119	30
PC 42:2	Phosphatidylcholine 42:2	Phosphatidylcholines	0.25	0.26	0.14	0.45	0.19	0.32	0.13	0.078	100	0.01136	30
PC 42:4	Phosphatidylcholine 42:4	Phosphatidylcholines	0.15	0.15	0.083	0.23	0.12	0.19	0.069	0.041	100	0.011	30
PC 42:5	Phosphatidylcholine 42:5	Phosphatidylcholines	0.24	0.26	0.16	0.55	0.2	0.3	0.097	0.092	100	0.17	30
PC 42:6	Phosphatidylcholine 42:6	Phosphatidylcholines	0.36	0.39	0.25	0.81	0.32	0.44	0.12	0.12	97	0.135	30
PC O-28:0	Phosphatidylcholine O-28:0	Phosphatidylcholines	0.29	0.33	0.23	0.65	0.25	0.39	0.14	0.12	37	0.0619	30
PC O-28:1	Phosphatidylcholine O-28:1	Phosphatidylcholines	0.36	0.39	0.18	0.67	0.27	0.51	0.23	0.13	100	0.166	30
PC O-30:0	Phosphatidylcholine O-30:0	Phosphatidylcholines	0.31	0.31	0.16	0.47	0.24	0.35	0.11	0.078	93	0.033	30
PC O-30:1	Phosphatidylcholine O-30:1	Phosphatidylcholines	0.2	0.21	0.04	0.59	0.094	0.27	0.18	0.15	40	0.05	30
PC O-30:2	Phosphatidylcholine O-30:2	Phosphatidylcholines	0.12	0.12	0.05	0.17	0.1	0.16	0.056	0.032	100	0.00852	30
PC O-32:1	Phosphatidylcholine O-32:1	Phosphatidylcholines	2.6	2.7	1.7	4.6	2	3.1	1.2	0.73	100	0.026175	30
PC O-32:2	Phosphatidylcholine O-32:2	Phosphatidylcholines	0.8	0.85	0.51	1.5	0.69	0.93	0.24	0.24	100	0.015695	30
PC O-34:0	Phosphatidylcholine O-34:0	Phosphatidylcholines	1.3	1.3	0.65	2	1	1.6	0.55	0.36	100	0.01855	30
PC O-34:1	Phosphatidylcholine O-34:1	Phosphatidylcholines	7.6	8	5	13	6.2	9.1	2.8	2	100	0.017	30
PC O-34:2	Phosphatidylcholine O-34:2	Phosphatidylcholines	11	12	6.7	21	9.4	15	5.4	4	100	0.027135	30
PC O-34:3	Phosphatidylcholine O-34:3	Phosphatidylcholines	8.6	9.2	4.7	17	6.3	12	6.1	3.2	100	0.335	30
PC O-36:0	Phosphatidylcholine O-36:0	Phosphatidylcholines	0.75	0.78	0.47	1.1	0.59	0.96	0.36	0.21	100	2.82	30
PC O-36:1	Phosphatidylcholine O-36:1	Phosphatidylcholines	6	6.4	4.1	9.8	5.1	7.8	2.7	1.6	100	0.040903	30
PC O-36:2	Phosphatidylcholine O-36:2	Phosphatidylcholines	12	13	7.7	21	10	15	4.5	3.8	100	0.01898	30
PC O-36:3	Phosphatidylcholine O-36:3	Phosphatidylcholines	6.9	7.5	4.1	12	5.6	9.2	3.6	2.3	100	0.030305	30
PC O-36:4	Phosphatidylcholine O-36:4	Phosphatidylcholines	18	19	9.8	32	15	23	7.6	5	100	0.01406	30
PC O-36:5	Phosphatidylcholine O-36:5	Phosphatidylcholines	15	14	9.1	27	11	17	5.7	3.8	100	0.685	30
PC O-38:0	Phosphatidylcholine O-38:0	Phosphatidylcholines	2.1	2.1	0.9	3.9	1.7	2.5	0.87	0.72	100	0.0099198	30
PC O-38:1	Phosphatidylcholine O-38:1	Phosphatidylcholines	0.3	0.3	0.069	0.59	0.17	0.41	0.24	0.15	87	0.00937	30
PC O-38:2	Phosphatidylcholine O-38:2	Phosphatidylcholines	1.5	1.5	0.76	2.6	1.2	1.7	0.5	0.4	100	0.013125	30
PC O-38:3	Phosphatidylcholine O-38:3	Phosphatidylcholines	2.9	3	1.9	4.4	2.5	3.4	0.9	0.72	100	0.02148	30
PC O-38:4	Phosphatidylcholine O-38:4	Phosphatidylcholines	12	13	7.9	21	11	15	4.4	3	100	0.028935	30
PC O-38:5	Phosphatidylcholine O-38:5	Phosphatidylcholines	19	19	12	31	16	21	5.7	4.1	100	0.010565	30
PC O-38:6	Phosphatidylcholine O-38:6	Phosphatidylcholines	8.2	8.5	5.4	16	7.4	9.5	2.1	2	100	0.0110284	30
PC O-40:1	Phosphatidylcholine O-40:1	Phosphatidylcholines	1.2	1.3	0.46	1.9	1	1.5	0.5	0.33	100	0.017	30
PC O-40:2	Phosphatidylcholine O-40:2	Phosphatidylcholines	1.6	1.5	0.94	2.1	1.3	1.7	0.41	0.29	100	0.020575	30
PC O-40:3	Phosphatidylcholine O-40:3	Phosphatidylcholines	0.8	0.84	0.53	1.3	0.65	0.99	0.34	0.21	100	0.063	30
PC O-40:4	Phosphatidylcholine O-40:4	Phosphatidylcholines	2	2.1	1.2	3.5	1.7	2.4	0.73	0.6	100	0.014	30
PC O-40:5	Phosphatidylcholine O-40:5	Phosphatidylcholines	3.1	3.2	2.1	4.9	2.6	3.4	0.83	0.74	100	0.0194	30
PC O-40:6	Phosphatidylcholine O-40:6	Phosphatidylcholines	4.4	4.6	3.1	7.4	4	5.1	1	1.1	100	0.696	30
PC O-42:0	Phosphatidylcholine O-42:0	Phosphatidylcholines			1.9	1.9					3.3	0.08374	30
PC O-42:1	Phosphatidylcholine O-42:1	Phosphatidylcholines	0.34	0.35	0.23	0.55	0.28	0.42	0.13	0.093	100	0.02857	30
PC O-42:2	Phosphatidylcholine O-42:2	Phosphatidylcholines	0.46	0.46	0.25	0.69	0.39	0.53	0.15	0.11	100	0.01807	30
PC O-42:3	Phosphatidylcholine O-42:3	Phosphatidylcholines	0.64	0.64	0.4	0.99	0.5	0.76	0.26	0.16	100	0.167	30
PC O-42:4	Phosphatidylcholine O-42:4	Phosphatidylcholines	0.66	0.71	0.38	1.4	0.55	0.84	0.29	0.23	100	0.673	30
PC O-42:5	Phosphatidylcholine O-42:5	Phosphatidylcholines	1.6	1.7	1.1	3.4	1.3	1.8	0.58	0.49	100	0.06	30
PC O-44:3	Phosphatidylcholine O-44:3	Phosphatidylcholines	0.1	0.11	0.063	0.14	0.085	0.13	0.043	0.025	100	0.118	30
PC O-44:4	Phosphatidylcholine O-44:4	Phosphatidylcholines	0.24	0.25	0.19	0.44	0.21	0.28	0.075	0.057	83	0.072785	30
PC O-44:5	Phosphatidylcholine O-44:5	Phosphatidylcholines	1	1.1	0.53	2.5	0.82	1.3	0.47	0.39	100	0.07648	30
PC O-44:6	Phosphatidylcholine O-44:6	Phosphatidylcholines	1	1.1	0.52	2.8	0.89	1.3	0.4	0.44	100	0.02028	30
SM 33:1	Sphingomyelin 33:1	Sphingomyelins	5.6	5.7	2.8	8.8	4.7	6.5	1.8	1.5	100	0.004	30
SM 34:1	Sphingomyelin 34:1	Sphingomyelins	110	109	75	167	93	118	25	21	100	0.032	30
SM 34:2	Sphingomyelin 34:2	Sphingomyelins	17	18	9.2	33	15	19	4	4.9	100	0.0216186	30
SM 35:1	Sphingomyelin 35:1	Sphingomyelins	3.3	3.3	1.9	4.7	2.9	3.8	0.94	0.68	100	0.021	30
SM 36:1	Sphingomyelin 36:1	Sphingomyelins	22	22	12	31	19	25	5.6	4.4	100	0.009	30
SM 36:2	Sphingomyelin 36:2	Sphingomyelins	12	12	5.1	19	10	14	3.4	2.9	100	0.005	30
SM 38:3	Sphingomyelin 38:3	Sphingomyelins	0.45	0.46	0.18	1.1	0.34	0.55	0.21	0.16	100	0.032	30
SM 40:4	Sphingomyelin 40:4	Sphingomyelins	0.098	0.12	0.031	0.26	0.065	0.15	0.089	0.063	50	0.031	30
SM 41:1	Sphingomyelin 41:1	Sphingomyelins	11	12	7.7	18	9.8	13	3.2	2.6	100	0.009	30
SM 41:2	Sphingomyelin 41:2	Sphingomyelins	9.7	9.4	4.4	15	7.7	10	2.8	2.1	100	0.00719	30
SM 42:1	Sphingomyelin 42:1	Sphingomyelins	18	18	9.9	31	14	20	5.8	4.6	100	0.045	30
SM 42:2	Sphingomyelin 42:2	Sphingomyelins	39	40	25	63	36	43	7.9	8	100	0.0044	30
SM 43:1	Sphingomyelin 43:1	Sphingomyelins	1	1.1	0.66	1.8	0.91	1.2	0.33	0.26	100	0.08305	30
SM 44:1	Sphingomyelin 44:1	Sphingomyelins	0.15	0.15	0.073	0.28	0.13	0.18	0.059	0.047	100	0.159	30
SM 44:2	Sphingomyelin 44:2	Sphingomyelins	0.28	0.29	0.12	0.53	0.24	0.34	0.094	0.08	100	0.325	30
TG 14:0_32:2	Triacylglyceride 14:0_32:2	Triglycerides	0.97	1.1	0.44	2.6	0.6	1.4	0.82	0.56	77	0.629	30
TG 14:0_34:0	Triacylglyceride 14:0_34:0	Triglycerides	1.3	1.6	0.82	3.2	0.95	2.3	1.3	0.81	70	0.189	30
TG 14:0_34:1	Triacylglyceride 14:0_34:1	Triglycerides	7.4	8.6	1.6	21	3.3	12	8.5	5.8	100	0.216	30
TG 14:0_34:2	Triacylglyceride 14:0_34:2	Triglycerides	6	6.4	1.3	15	3.2	9.6	6.4	3.9	100	0.26075	30
TG 14:0_34:3	Triacylglyceride 14:0_34:3	Triglycerides	1.3	1.5	0.37	3.5	0.82	2.2	1.4	0.89	100	0.1175	30
TG 14:0_35:1	Triacylglyceride 14:0_35:1	Triglycerides	0.42	0.46	0.27	0.8	0.35	0.54	0.18	0.15	70	0.214	30
TG 14:0_35:2	Triacylglyceride 14:0_35:2	Triglycerides	0.51	0.5	0.27	0.81	0.32	0.65	0.33	0.18	70	1.075	30
TG 14:0_36:1	Triacylglyceride 14:0_36:1	Triglycerides	2.2	2.5	0.78	5.7	1.4	3.5	2.1	1.4	93	1.585	30
TG 14:0_36:2	Triacylglyceride 14:0_36:2	Triglycerides	11	13	4.3	27	6.6	18	11	6.3	100	0.108	30
TG 14:0_36:3	Triacylglyceride 14:0_36:3	Triglycerides	13	14	5.1	26	8.6	19	10	6.3	100	0.0715	30
TG 14:0_36:4	Triacylglyceride 14:0_36:4	Triglycerides	5.1	5.6	1.8	11	3.3	8.3	5	2.9	100	0.0981	30
TG 14:0_38:4	Triacylglyceride 14:0_38:4	Triglycerides	0.39	0.44	0.15	0.86	0.23	0.63	0.4	0.22	97	0.0470066	30
TG 14:0_38:5	Triacylglyceride 14:0_38:5	Triglycerides	0.54	0.52	0.18	1.4	0.28	0.7	0.42	0.28	97	0.16	30
TG 14:0_39:3	Triacylglyceride 14:0_39:3	Triglycerides									0	0.204	30
TG 16:0_28:1	Triacylglyceride 16:0_28:1	Triglycerides	1.5	1.6	0.8	2.5	0.92	2.3	1.4	0.7	27	0.177	30
TG 16:0_28:2	Triacylglyceride 16:0_28:2	Triglycerides	0.47	0.61	0.27	1.6	0.3	0.67	0.37	0.45	50	0.796	30
TG 16:0_30:2	Triacylglyceride 16:0_30:2	Triglycerides	0.84	1.4	0.41	4.9	0.6	1.7	1.1	1.2	87	0.473	30
TG 16:0_32:0	Triacylglyceride 16:0_32:0	Triglycerides	7.3	9.1	2	41	4.4	11	6.9	8.1	87	0.246	30
TG 16:0_32:1	Triacylglyceride 16:0_32:1	Triglycerides	12	14	2	39	5.2	19	14	9.9	100	0.08682	30
TG 16:0_32:2	Triacylglyceride 16:0_32:2	Triglycerides	6.7	7.7	1.4	19	3.5	11	7.1	5	100	0.441	30
TG 16:0_32:3	Triacylglyceride 16:0_32:3	Triglycerides	1.1	1.3	0.28	3.7	0.58	1.8	1.2	0.84	100	0.145	30
TG 16:0_33:1	Triacylglyceride 16:0_33:1	Triglycerides	2	2.4	0.67	5.7	1.2	3.6	2.4	1.4	97	0.701	30
TG 16:0_33:2	Triacylglyceride 16:0_33:2	Triglycerides	1.4	1.4	0.53	2.9	0.87	2	1.1	0.62	93	0.823	30
TG 16:0_34:0	Triacylglyceride 16:0_34:0	Triglycerides	6.7	8.8	1.6	36	4.1	11	6.6	7.2	100	0.491	30
TG 16:0_34:1	Triacylglyceride 16:0_34:1	Triglycerides	52	67	15	256	36	83	47	50	100	0.207	30
TG 16:0_34:2	Triacylglyceride 16:0_34:2	Triglycerides	51	62	18	188	37	79	42	38	100	0.332	30
TG 16:0_34:3	Triacylglyceride 16:0_34:3	Triglycerides	14	19	6.2	42	11	28	17	11	100	0.269	30
TG 16:0_34:4	Triacylglyceride 16:0_34:4	Triglycerides	1.6	2	0.7	4.9	1.1	3	1.9	1.2	100	0.166	30
TG 16:0_35:1	Triacylglyceride 16:0_35:1	Triglycerides	1.8	2.3	0.73	6.1	1.2	3.3	2.1	1.4	100	0.08668	30
TG 16:0_35:2	Triacylglyceride 16:0_35:2	Triglycerides	3.2	3.4	0.94	9.4	1.8	4.4	2.5	2	100	0.596	30
TG 16:0_35:3	Triacylglyceride 16:0_35:3	Triglycerides	1.6	1.7	0.6	4.4	0.96	2.3	1.4	0.89	100	0.508	30
TG 16:0_36:2	Triacylglyceride 16:0_36:2	Triglycerides	143	167	64	472	106	205	99	89	100	0.277	30
TG 16:0_36:3	Triacylglyceride 16:0_36:3	Triglycerides	176	206	77	539	137	246	109	98	100	0.088265	30
TG 16:0_36:4	Triacylglyceride 16:0_36:4	Triglycerides	74	85	30	194	52	117	65	43	100	0.185	30
TG 16:0_36:5	Triacylglyceride 16:0_36:5	Triglycerides	8.9	11	3.7	31	6.5	14	7.1	6.2	100	0.141	30
TG 16:0_36:6	Triacylglyceride 16:0_36:6	Triglycerides	0.76	1	0.29	3.3	0.56	1.3	0.74	0.65	100	0.186	30
TG 16:0_37:3	Triacylglyceride 16:0_37:3	Triglycerides	0.51	0.58	0.3	1.1	0.38	0.68	0.3	0.23	93	0.333	30
TG 16:0_38:1	Triacylglyceride 16:0_38:1	Triglycerides	0.56	0.71	0.38	1.7	0.45	0.82	0.37	0.35	80	0.655	30
TG 16:0_38:2	Triacylglyceride 16:0_38:2	Triglycerides	1.6	1.8	0.73	5	1	2.4	1.3	1	100	0.71	30
TG 16:0_38:3	Triacylglyceride 16:0_38:3	Triglycerides	3.1	3.4	1.1	9	2	4.4	2.4	1.8	100	0.072	30
TG 16:0_38:4	Triacylglyceride 16:0_38:4	Triglycerides	4.2	4.6	1.7	14	2.7	5.9	3.2	2.5	100	0.06085	30
TG 16:0_38:5	Triacylglyceride 16:0_38:5	Triglycerides	5.1	5.5	2	14	3.4	6.9	3.5	2.6	100	0.176	30
TG 16:0_38:6	Triacylglyceride 16:0_38:6	Triglycerides	3.1	3.6	1.2	8.1	2.4	4.6	2.2	1.6	100	0.07978	30
TG 16:0_38:7	Triacylglyceride 16:0_38:7	Triglycerides	0.91	1.2	0.42	3.5	0.71	1.5	0.78	0.68	97	0.14235	30
TG 16:0_40:6	Triacylglyceride 16:0_40:6	Triglycerides	3	3.2	0.98	9.1	2	3.7	1.7	1.6	100	0.0785	30
TG 16:0_40:7	Triacylglyceride 16:0_40:7	Triglycerides	3.6	3.6	0.92	8.2	2.6	4.4	1.9	1.6	100	0.1395	30
TG 16:0_40:8	Triacylglyceride 16:0_40:8	Triglycerides	1.7	1.8	0.36	3.4	1.2	2.1	0.99	0.88	100	0.219	30
TG 16:1_28:0	Triacylglyceride 16:1_28:0	Triglycerides	0.63	0.76	0.41	1.4	0.46	1.2	0.73	0.41	13	0.33	30
TG 16:1_30:1	Triacylglyceride 16:1_30:1	Triglycerides	0.77	0.95	0.55	2.4	0.61	1.2	0.58	0.49	47	0.379	30
TG 16:1_32:0	Triacylglyceride 16:1_32:0	Triglycerides	2	2.7	0.87	8.4	1	3.4	2.4	1.9	93	0.216	30
TG 16:1_32:1	Triacylglyceride 16:1_32:1	Triglycerides	3.8	3.9	1.6	8.4	2.1	5.4	3.4	1.9	87	0.441	30
TG 16:1_32:2	Triacylglyceride 16:1_32:2	Triglycerides	1.4	1.6	0.5	3.6	0.92	2.1	1.2	0.83	97	0.183	30
TG 16:1_33:1	Triacylglyceride 16:1_33:1	Triglycerides	0.7	0.71	0.4	1.6	0.48	0.91	0.43	0.28	77	0.367	30
TG 16:1_34:0	Triacylglyceride 16:1_34:0	Triglycerides	2.5	2.8	1	6.8	1.5	3.8	2.3	1.6	93	0.233	30
TG 16:1_34:1	Triacylglyceride 16:1_34:1	Triglycerides	18	22	7.4	56	12	29	16	12	100	0.101	30
TG 16:1_34:2	Triacylglyceride 16:1_34:2	Triglycerides	13	17	6.1	39	10	26	16	9.6	100	0.165	30
TG 16:1_34:3	Triacylglyceride 16:1_34:3	Triglycerides	2.6	3.6	1.2	10	2	4.5	2.4	2.3	100	0.218	30
TG 16:1_36:1	Triacylglyceride 16:1_36:1	Triglycerides	3.2	3.8	1.3	9.2	2.3	4.9	2.6	1.8	100	0.1515	30
TG 16:1_36:2	Triacylglyceride 16:1_36:2	Triglycerides	18	21	6.9	48	13	28	15	9.8	100	0.087	30
TG 16:1_36:3	Triacylglyceride 16:1_36:3	Triglycerides	21	25	7.6	53	17	32	15	12	100	0.049255	30
TG 16:1_36:4	Triacylglyceride 16:1_36:4	Triglycerides	8.7	10	3	28	6.5	12	5.4	6.1	100	0.14	30
TG 16:1_36:5	Triacylglyceride 16:1_36:5	Triglycerides	1.2	1.7	0.52	5.7	0.87	2.1	1.2	1.2	100	0.147	30
TG 16:1_38:3	Triacylglyceride 16:1_38:3	Triglycerides	0.49	0.55	0.25	1.3	0.38	0.73	0.36	0.25	100	0.22	30
TG 16:1_38:4	Triacylglyceride 16:1_38:4	Triglycerides	0.62	0.77	0.31	1.6	0.49	1	0.52	0.38	100	0.225	30
TG 16:1_38:5	Triacylglyceride 16:1_38:5	Triglycerides	0.88	0.99	0.41	2.4	0.64	1.3	0.66	0.44	100	0.121	30
TG 17:0_32:1	Triacylglyceride 17:0_32:1	Triglycerides	0.61	0.61	0.35	1	0.44	0.74	0.3	0.19	50	0.132	30
TG 17:0_34:1	Triacylglyceride 17:0_34:1	Triglycerides	1.7	2	0.64	5.5	1	2.6	1.6	1.3	100	0.0759	30
TG 17:0_34:2	Triacylglyceride 17:0_34:2	Triglycerides	1.6	1.7	0.58	3.9	1.1	2.2	1.1	0.79	100	0.07783	30
TG 17:0_34:3	Triacylglyceride 17:0_34:3	Triglycerides	0.5	0.52	0.21	1	0.33	0.71	0.38	0.21	97	0.05679	30
TG 17:0_36:3	Triacylglyceride 17:0_36:3	Triglycerides	3.4	3.8	1.6	8	2.9	4.4	1.5	1.5	100	0.183	30
TG 17:0_36:4	Triacylglyceride 17:0_36:4	Triglycerides	1.6	1.7	0.68	3.4	1.2	2.3	1.1	0.71	100	0.2255	30
TG 17:1_32:1	Triacylglyceride 17:1_32:1	Triglycerides	0.63	0.68	0.41	1.2	0.49	0.81	0.32	0.22	67	0.100895	30
TG 17:1_34:1	Triacylglyceride 17:1_34:1	Triglycerides	2	2.4	0.81	6.8	1.3	3	1.7	1.4	100	0.0718	30
TG 17:1_34:2	Triacylglyceride 17:1_34:2	Triglycerides	1.5	1.7	0.69	4.5	0.95	2.3	1.3	0.88	100	0.05202	30
TG 17:1_34:3	Triacylglyceride 17:1_34:3	Triglycerides	0.45	0.49	0.21	0.91	0.32	0.69	0.37	0.22	97	0.050025	30
TG 17:1_36:3	Triacylglyceride 17:1_36:3	Triglycerides	1.7	1.8	0.71	4.3	1.3	2.3	0.98	0.77	100	0.0569	30
TG 17:1_36:4	Triacylglyceride 17:1_36:4	Triglycerides	0.84	0.88	0.25	1.9	0.61	1.1	0.5	0.42	100	0.014	30
TG 17:1_36:5	Triacylglyceride 17:1_36:5	Triglycerides	0.3	0.33	0.12	0.75	0.19	0.44	0.25	0.19	83	0.019675	30
TG 17:1_38:5	Triacylglyceride 17:1_38:5	Triglycerides									0	0.02356	30
TG 17:1_38:6	Triacylglyceride 17:1_38:6	Triglycerides									0	0.093	30
TG 17:1_38:7	Triacylglyceride 17:1_38:7	Triglycerides									0	0.05748	30
TG 17:2_34:2	Triacylglyceride 17:2_34:2	Triglycerides	0.31	0.34	0.14	0.66	0.21	0.46	0.26	0.16	93	0.097	30
TG 17:2_34:3	Triacylglyceride 17:2_34:3	Triglycerides	0.19	0.2	0.094	0.37	0.12	0.24	0.11	0.072	83	0.1019	30
TG 17:2_36:2	Triacylglyceride 17:2_36:2	Triglycerides	0.35	0.4	0.17	1.1	0.29	0.49	0.21	0.19	93	0.1239	30
TG 17:2_36:3	Triacylglyceride 17:2_36:3	Triglycerides	0.44	0.45	0.11	0.86	0.29	0.65	0.36	0.19	100	0.0401	30
TG 17:2_36:4	Triacylglyceride 17:2_36:4	Triglycerides	0.41	0.44	0.24	0.82	0.32	0.52	0.19	0.16	100	0.0539	30
TG 17:2_38:5	Triacylglyceride 17:2_38:5	Triglycerides	0.18	0.2	0.099	0.4	0.12	0.25	0.14	0.089	100	0.031795	30
TG 17:2_38:6	Triacylglyceride 17:2_38:6	Triglycerides	0.27	0.28	0.11	0.64	0.23	0.36	0.13	0.11	90	0.1675	30
TG 17:2_38:7	Triacylglyceride 17:2_38:7	Triglycerides	0.079	0.082	0.052	0.12	0.069	0.091	0.022	0.019	40	0.307	30
TG 18:0_30:0	Triacylglyceride 18:0_30:0	Triglycerides	0.96	1.1	0.58	2.3	0.74	1.3	0.57	0.46	43	0.428	30
TG 18:0_30:1	Triacylglyceride 18:0_30:1	Triglycerides	0.61	0.74	0.4	1.8	0.42	0.97	0.55	0.4	50	0.18	30
TG 18:0_32:0	Triacylglyceride 18:0_32:0	Triglycerides	1.8	2.5	0.86	8.8	1.2	3.8	2.6	2	77	0.1135	30
TG 18:0_32:1	Triacylglyceride 18:0_32:1	Triglycerides	1.7	2.1	0.47	5.5	0.98	2.7	1.8	1.4	97	0.218	30
TG 18:0_32:2	Triacylglyceride 18:0_32:2	Triglycerides	1	1.2	0.42	2.6	0.75	1.5	0.72	0.57	87	0.072495	30
TG 18:0_34:2	Triacylglyceride 18:0_34:2	Triglycerides	7.2	8.7	2.4	27	4.7	11	6.3	6	100	0.5	30
TG 18:0_34:3	Triacylglyceride 18:0_34:3	Triglycerides	1.5	1.8	0.66	4.6	1.1	2.4	1.3	0.96	100	2.56	30
TG 18:0_36:1	Triacylglyceride 18:0_36:1	Triglycerides	7.2	7.1	6.8	7.4	6.8			0.26	10	0.271	30
TG 18:0_36:2	Triacylglyceride 18:0_36:2	Triglycerides	11	13	4.6	38	8.2	16	8.1	7.4	100	0.135	30
TG 18:0_36:3	Triacylglyceride 18:0_36:3	Triglycerides	15	17	5.7	46	12	18	6.6	8.3	100	0.037365	30
TG 18:0_36:4	Triacylglyceride 18:0_36:4	Triglycerides	7.3	8.3	2.8	22	5.5	10	4.8	4.2	100	0.07297	30
TG 18:0_36:5	Triacylglyceride 18:0_36:5	Triglycerides	1.1	1.3	0.49	3.6	0.85	1.5	0.69	0.69	100	0.095	30
TG 18:0_38:6	Triacylglyceride 18:0_38:6	Triglycerides	1.5	1.5	0.38	2.8	1	2	0.96	0.59	100	1.5755	30
TG 18:0_38:7	Triacylglyceride 18:0_38:7	Triglycerides	0.4	0.46	0.22	1	0.29	0.58	0.3	0.21	93	0.248	30
TG 18:1_26:0	Triacylglyceride 18:1_26:0	Triglycerides	1.5	1.6	0.69	2.8	0.9	2.2	1.3	0.73	33	0.601	30
TG 18:1_28:1	Triacylglyceride 18:1_28:1	Triglycerides	0.93	1.4	0.69	3.1	0.83	1.7	0.91	0.78	67	0.34	30
TG 18:1_30:0	Triacylglyceride 18:1_30:0	Triglycerides	9	11	1.8	26	4.2	16	12	6.9	100	0.226	30
TG 18:1_30:1	Triacylglyceride 18:1_30:1	Triglycerides	5.7	6.5	1.2	21	2.9	8.6	5.8	4.6	100	0.663	30
TG 18:1_30:2	Triacylglyceride 18:1_30:2	Triglycerides	1.7	2.2	0.5	6.9	1.1	2.5	1.4	1.6	100	0.592	30
TG 18:1_31:0	Triacylglyceride 18:1_31:0	Triglycerides	2.5	2.8	1.7	4.7	2	3.5	1.5	0.89	57	0.402	30
TG 18:1_32:0	Triacylglyceride 18:1_32:0	Triglycerides	31	40	9.4	147	21	50	28	29	100	0.2255	30
TG 18:1_32:1	Triacylglyceride 18:1_32:1	Triglycerides	41	47	17	108	25	64	39	24	100	0.06903	30
TG 18:1_32:2	Triacylglyceride 18:1_32:2	Triglycerides	15	17	6.8	34	10	22	12	7.7	100	0.181	30
TG 18:1_32:3	Triacylglyceride 18:1_32:3	Triglycerides	1.8	2.2	0.74	4.5	1.4	2.8	1.5	1	100	0.2	30
TG 18:1_33:0	Triacylglyceride 18:1_33:0	Triglycerides	2.1	2.5	0.69	6.2	1.3	3.3	2	1.5	100	0.126	30
TG 18:1_33:1	Triacylglyceride 18:1_33:1	Triglycerides	6.1	6.8	2.8	17	4	8.7	4.8	3.3	100	0.195	30
TG 18:1_33:2	Triacylglyceride 18:1_33:2	Triglycerides	2.8	3.1	1.6	6.1	2.2	3.8	1.6	1.1	100	0.907	30
TG 18:1_33:3	Triacylglyceride 18:1_33:3	Triglycerides	0.56	0.56	0.23	0.93	0.42	0.72	0.3	0.19	100	0.561	30
TG 18:1_34:1	Triacylglyceride 18:1_34:1	Triglycerides	237	279	112	815	182	342	160	146	100	0.1655	30
TG 18:1_34:2	Triacylglyceride 18:1_34:2	Triglycerides	178	211	79	551	148	267	119	98	100	0.062285	30
TG 18:1_34:3	Triacylglyceride 18:1_34:3	Triglycerides	27	35	13	74	24	45	21	16	100	0.1195	30
TG 18:1_34:4	Triacylglyceride 18:1_34:4	Triglycerides	3.4	3.7	1.3	10	2.5	4.4	2	1.9	100	0.05142	30
TG 18:1_35:2	Triacylglyceride 18:1_35:2	Triglycerides	4.9	5.2	2.3	12	3.7	6.7	3	2.1	100	0.849	30
TG 18:1_35:3	Triacylglyceride 18:1_35:3	Triglycerides	1.6	1.7	0.84	3.6	1.3	2.2	0.95	0.68	100	0.69	30
TG 18:1_36:0	Triacylglyceride 18:1_36:0	Triglycerides	2.7	3.4	1.9	8.3	2.2	4.2	2	1.7	70	0.783	30
TG 18:1_36:1	Triacylglyceride 18:1_36:1	Triglycerides	25	30	10	77	19	40	21	16	100	15.8	30
TG 18:1_36:2	Triacylglyceride 18:1_36:2	Triglycerides	90	107	35	241	69	133	63	55	100	0.25	30
TG 18:1_36:3	Triacylglyceride 18:1_36:3	Triglycerides	90	110	38	233	78	130	52	52	100	0.07562	30
TG 18:1_36:4	Triacylglyceride 18:1_36:4	Triglycerides	37	43	14	102	29	50	21	21	100	0.216	30
TG 18:1_36:5	Triacylglyceride 18:1_36:5	Triglycerides	7.8	9.6	3.1	31	6.3	12	5.7	5.5	100	0.06176	30
TG 18:1_36:6	Triacylglyceride 18:1_36:6	Triglycerides	0.94	1.2	0.35	4	0.69	1.6	0.87	0.72	100	0.05392	30
TG 18:1_38:5	Triacylglyceride 18:1_38:5	Triglycerides	6.4	6.8	2.6	14	5.2	7.8	2.6	2.5	100	0.298	30
TG 18:1_38:6	Triacylglyceride 18:1_38:6	Triglycerides	4.4	4.6	1.4	8.3	3.3	5.8	2.5	1.7	100	0.125	30
TG 18:1_38:7	Triacylglyceride 18:1_38:7	Triglycerides	1.1	1.4	0.56	3.7	0.8	2	1.2	0.78	100	0.1525	30
TG 18:2_28:0	Triacylglyceride 18:2_28:0	Triglycerides	1.1	1.6	0.43	6.2	0.71	1.9	1.2	1.4	87	0.129	30
TG 18:2_30:0	Triacylglyceride 18:2_30:0	Triglycerides	5.7	6.3	1.2	16	3.3	8.9	5.6	3.9	100	0.411	30
TG 18:2_30:1	Triacylglyceride 18:2_30:1	Triglycerides	2.7	3.6	0.79	10	1.8	4.9	3.2	2.3	100	0.333	30
TG 18:2_31:0	Triacylglyceride 18:2_31:0	Triglycerides									0	0.229	30
TG 18:2_32:0	Triacylglyceride 18:2_32:0	Triglycerides	22	27	8.5	88	16	36	19	17	100	0.128	30
TG 18:2_32:1	Triacylglyceride 18:2_32:1	Triglycerides	23	28	12	57	17	40	23	14	100	0.208	30
TG 18:2_32:2	Triacylglyceride 18:2_32:2	Triglycerides	8.2	10	3.6	22	6.1	15	8.8	5.3	100	0.127	30
TG 18:2_33:0	Triacylglyceride 18:2_33:0	Triglycerides	1.4	1.6	0.4	3.7	0.85	2.1	1.2	0.81	100	0.078005	30
TG 18:2_33:1	Triacylglyceride 18:2_33:1	Triglycerides	3.7	4.2	2	8.7	2.8	5.1	2.3	1.7	100	0.2315	30
TG 18:2_33:2	Triacylglyceride 18:2_33:2	Triglycerides	1.9	2	0.88	3.8	1.3	2.6	1.3	0.88	100	0.495	30
TG 18:2_34:0	Triacylglyceride 18:2_34:0	Triglycerides	19	23	8.9	62	14	29	15	12	100	0.378	30
TG 18:2_34:1	Triacylglyceride 18:2_34:1	Triglycerides	162	189	69	488	129	222	93	90	100	0.1215	30
TG 18:2_34:2	Triacylglyceride 18:2_34:2	Triglycerides	112	136	46	322	86	185	99	71	100	0.057	30
TG 18:2_34:3	Triacylglyceride 18:2_34:3	Triglycerides	17	21	6.6	60	13	27	14	12	100	0.114	30
TG 18:2_34:4	Triacylglyceride 18:2_34:4	Triglycerides	1.8	2.3	0.65	8.3	1.2	2.8	1.6	1.6	100	0.06609	30
TG 18:2_35:1	Triacylglyceride 18:2_35:1	Triglycerides	3.6	4	1.5	9.1	2.8	4.8	2	1.6	100	0.047425	30
TG 18:2_35:2	Triacylglyceride 18:2_35:2	Triglycerides	3.2	3.3	1.5	6.9	2.2	4.1	1.9	1.4	100	0.566	30
TG 18:2_35:3	Triacylglyceride 18:2_35:3	Triglycerides	0.98	1.1	0.4	2.8	0.71	1.4	0.64	0.53	100	3.72	30
TG 18:2_36:0	Triacylglyceride 18:2_36:0	Triglycerides	1.9	2.3	1.1	5.7	1.6	2.6	1	1.1	97	8.23	30
TG 18:2_36:1	Triacylglyceride 18:2_36:1	Triglycerides	17	20	6.4	50	14	23	9	9.4	100	6.29	30
TG 18:2_36:2	Triacylglyceride 18:2_36:2	Triglycerides	53	63	20	127	44	74	29	29	100	0.2455	30
TG 18:2_36:3	Triacylglyceride 18:2_36:3	Triglycerides	49	56	17	138	37	66	29	28	100	0.052265	30
TG 18:2_36:4	Triacylglyceride 18:2_36:4	Triglycerides	21	24	6.5	85	15	30	15	15	100	0.039855	30
TG 18:2_36:5	Triacylglyceride 18:2_36:5	Triglycerides	4.6	5.8	1.3	26	3.3	7.4	4.1	4.6	100	0.03866	30
TG 18:2_38:4	Triacylglyceride 18:2_38:4	Triglycerides	2.9	3.1	1.2	6.4	2.2	3.8	1.6	1.3	100	0.04415	30
TG 18:2_38:5	Triacylglyceride 18:2_38:5	Triglycerides	4.1	4.6	1.7	9.2	3.4	6	2.6	1.9	100	0.066435	30
TG 18:2_38:6	Triacylglyceride 18:2_38:6	Triglycerides	2.6	2.9	0.82	5.6	2	4	2	1.3	100	0.1495	30
TG 18:3_30:0	Triacylglyceride 18:3_30:0	Triglycerides	0.64	0.74	0.15	2.5	0.4	0.97	0.57	0.52	97	0.418	30
TG 18:3_32:0	Triacylglyceride 18:3_32:0	Triglycerides	2.5	2.8	0.94	6.6	1.6	4	2.4	1.6	100	0.04214	30
TG 18:3_32:1	Triacylglyceride 18:3_32:1	Triglycerides	2.7	3.2	1.1	7.2	1.8	4.6	2.8	1.7	100	0.1155	30
TG 18:3_33:2	Triacylglyceride 18:3_33:2	Triglycerides			0.25	0.25					3.3	0.158	30
TG 18:3_34:0	Triacylglyceride 18:3_34:0	Triglycerides	2.1	2.5	0.97	6.1	1.6	3.5	1.9	1.2	100	0.1065	30
TG 18:3_34:1	Triacylglyceride 18:3_34:1	Triglycerides	18	21	8.4	46	14	26	13	10	100	0.070245	30
TG 18:3_34:2	Triacylglyceride 18:3_34:2	Triglycerides	12	14	5.2	36	9.1	17	8.2	7.5	100	0.123	30
TG 18:3_34:3	Triacylglyceride 18:3_34:3	Triglycerides	2	2.5	0.81	9	1.3	3	1.7	1.7	100	0.06133	30
TG 18:3_35:2	Triacylglyceride 18:3_35:2	Triglycerides	0.5	0.53	0.18	1	0.33	0.62	0.29	0.21	100	0.0804964	30
TG 18:3_36:1	Triacylglyceride 18:3_36:1	Triglycerides	2.2	2.6	0.95	6	1.9	3.1	1.2	1.1	100	0.07724	30
TG 18:3_36:2	Triacylglyceride 18:3_36:2	Triglycerides	8.4	9.8	3.4	25	6.5	12	5.6	4.5	100	0.068	30
TG 18:3_36:3	Triacylglyceride 18:3_36:3	Triglycerides	8.7	10	3.6	37	6.5	12	5.9	6.3	100	0.152	30
TG 18:3_36:4	Triacylglyceride 18:3_36:4	Triglycerides	3.2	4	1.1	19	2.3	4.6	2.3	3.2	100	0.113	30
TG 18:3_38:5	Triacylglyceride 18:3_38:5	Triglycerides	0.74	0.85	0.28	1.8	0.55	1.1	0.59	0.41	100	0.245	30
TG 18:3_38:6	Triacylglyceride 18:3_38:6	Triglycerides	0.56	0.62	0.19	1.5	0.37	0.78	0.41	0.32	100	0.1235	30
TG 20:0_32:3	Triacylglyceride 20:0_32:3	Triglycerides	0.5	0.57	0.26	1.1	0.37	0.76	0.39	0.24	100	0.167	30
TG 20:0_32:4	Triacylglyceride 20:0_32:4	Triglycerides	0.46	0.64	0.28	2.4	0.38	0.8	0.42	0.43	100	0.02262	30
TG 20:0_34:1	Triacylglyceride 20:0_34:1	Triglycerides	0.6	0.67	0.34	1.4	0.45	0.82	0.37	0.27	90	0.018395	30
TG 20:1_24:3	Triacylglyceride 20:1_24:3	Triglycerides									0	0.09108	30
TG 20:1_26:1	Triacylglyceride 20:1_26:1	Triglycerides									0	0.047	30
TG 20:1_30:1	Triacylglyceride 20:1_30:1	Triglycerides	0.24	0.26	0.17	0.41	0.2	0.32	0.12	0.081	27	0.0905	30
TG 20:1_31:0	Triacylglyceride 20:1_31:0	Triglycerides									0	0.102	30
TG 20:1_32:1	Triacylglyceride 20:1_32:1	Triglycerides	0.44	0.48	0.24	0.96	0.32	0.57	0.26	0.19	70	0.099	30
TG 20:1_32:2	Triacylglyceride 20:1_32:2	Triglycerides	0.36	0.38	0.19	0.66	0.28	0.48	0.21	0.14	100	0.1145	30
TG 20:1_32:3	Triacylglyceride 20:1_32:3	Triglycerides	0.23	0.27	0.14	0.51	0.17	0.37	0.21	0.11	87	0.099165	30
TG 20:1_34:0	Triacylglyceride 20:1_34:0	Triglycerides	0.34	0.44	0.29	0.82	0.3	0.52	0.21	0.2	37	0.33	30
TG 20:1_34:1	Triacylglyceride 20:1_34:1	Triglycerides	1.4	1.7	0.52	4.7	0.96	2.3	1.3	0.98	100	0.116	30
TG 20:1_34:2	Triacylglyceride 20:1_34:2	Triglycerides	1.3	1.4	0.51	3.4	0.8	1.7	0.91	0.75	100	0.145	30
TG 20:1_34:3	Triacylglyceride 20:1_34:3	Triglycerides	0.3	0.33	0.16	0.67	0.21	0.43	0.22	0.14	97	0.0827	30
TG 20:2_32:0	Triacylglyceride 20:2_32:0	Triglycerides	0.43	0.5	0.2	1.6	0.31	0.59	0.28	0.32	87	0.05495	30
TG 20:2_32:1	Triacylglyceride 20:2_32:1	Triglycerides	0.55	0.65	0.27	1.9	0.33	0.86	0.53	0.37	100	0.041	30
TG 20:2_34:1	Triacylglyceride 20:2_34:1	Triglycerides	2	2.2	0.92	6.8	1.3	2.7	1.5	1.2	100	0.106	30
TG 20:2_34:2	Triacylglyceride 20:2_34:2	Triglycerides	1.7	1.9	0.73	5.5	1.1	2.5	1.3	1	100	0.01616	30
TG 20:2_34:3	Triacylglyceride 20:2_34:3	Triglycerides	0.43	0.47	0.17	0.99	0.31	0.61	0.3	0.21	100	0.0419	30
TG 20:2_34:4	Triacylglyceride 20:2_34:4	Triglycerides	0.08	0.077	0.043	0.1	0.066	0.092	0.026	0.019	40	0.0726	30
TG 20:2_36:5	Triacylglyceride 20:2_36:5	Triglycerides	0.12	0.13	0.042	0.24	0.088	0.17	0.083	0.053	60	0.097	30
TG 20:3_32:0	Triacylglyceride 20:3_32:0	Triglycerides	0.61	0.72	0.21	1.9	0.32	0.99	0.67	0.43	100	0.0646	30
TG 20:3_32:1	Triacylglyceride 20:3_32:1	Triglycerides	0.59	0.8	0.28	2	0.44	1.1	0.67	0.45	100	0.0597	30
TG 20:3_32:2	Triacylglyceride 20:3_32:2	Triglycerides	0.35	0.4	0.17	0.76	0.23	0.52	0.29	0.17	97	0.069705	30
TG 20:3_34:0	Triacylglyceride 20:3_34:0	Triglycerides	0.52	0.56	0.2	1.7	0.35	0.76	0.4	0.3	100	0.045	30
TG 20:3_34:1	Triacylglyceride 20:3_34:1	Triglycerides	3.9	4.2	1.6	13	2.4	5.2	2.8	2.4	100	0.109	30
TG 20:3_34:2	Triacylglyceride 20:3_34:2	Triglycerides	3	3.4	1.2	8.8	2.1	4.3	2.1	1.7	100	0.032735	30
TG 20:3_34:3	Triacylglyceride 20:3_34:3	Triglycerides	0.66	0.72	0.22	1.7	0.44	0.85	0.41	0.39	100	0.207	30
TG 20:3_36:3	Triacylglyceride 20:3_36:3	Triglycerides	2	2.1	0.83	5.2	1.3	2.5	1.3	0.97	100	0.0939	30
TG 20:3_36:4	Triacylglyceride 20:3_36:4	Triglycerides	0.92	1	0.29	2.1	0.64	1.3	0.65	0.47	100	0.053755	30
TG 20:3_36:5	Triacylglyceride 20:3_36:5	Triglycerides	0.46	0.47	0.17	0.93	0.33	0.59	0.26	0.19	100	0.116	30
TG 20:4_30:0	Triacylglyceride 20:4_30:0	Triglycerides	0.54	0.6	0.19	1.7	0.3	0.87	0.56	0.35	90	0.062815	30
TG 20:4_32:0	Triacylglyceride 20:4_32:0	Triglycerides	1.8	2.1	0.44	4.5	1.2	2.8	1.7	1.2	100	0.0976	30
TG 20:4_32:1	Triacylglyceride 20:4_32:1	Triglycerides	1.7	2.1	0.77	4.3	1.1	2.9	1.8	1.1	100	0.0292	30
TG 20:4_32:2	Triacylglyceride 20:4_32:2	Triglycerides	0.71	0.85	0.28	2	0.52	1.1	0.57	0.43	100	0.209	30
TG 20:4_33:2	Triacylglyceride 20:4_33:2	Triglycerides	0.26	0.29	0.13	0.59	0.21	0.35	0.14	0.12	100	0.0695	30
TG 20:4_34:0	Triacylglyceride 20:4_34:0	Triglycerides	1.7	1.8	0.58	3.9	1.2	2.4	1.1	0.78	100	0.052835	30
TG 20:4_34:1	Triacylglyceride 20:4_34:1	Triglycerides	13	13	4.5	28	8.9	16	7	5.7	100	0.317	30
TG 20:4_34:2	Triacylglyceride 20:4_34:2	Triglycerides	9.2	11	3.4	21	7.6	13	5.8	4.8	100	0.02652	30
TG 20:4_34:3	Triacylglyceride 20:4_34:3	Triglycerides	1.6	1.9	0.74	4.1	1.3	2.3	0.92	0.83	100	2.4	30
TG 20:4_35:3	Triacylglyceride 20:4_35:3	Triglycerides	0.12	0.13	0.058	0.33	0.097	0.15	0.051	0.064	53	1.829	30
TG 20:4_36:2	Triacylglyceride 20:4_36:2	Triglycerides	9.3	9.9	3.9	19	8	11	3.1	3.6	100	0.638	30
TG 20:4_36:3	Triacylglyceride 20:4_36:3	Triglycerides	7.7	8.3	3.3	14	6	10	4.3	3.2	100	0.1358	30
TG 20:4_36:4	Triacylglyceride 20:4_36:4	Triglycerides	3.4	3.7	1.6	7.6	2.6	4.7	2.1	1.6	100	0.0528	30
TG 20:4_36:5	Triacylglyceride 20:4_36:5	Triglycerides	0.88	1.1	0.4	2.9	0.59	1.4	0.83	0.63	100	0.064385	30
TG 20:5_34:0	Triacylglyceride 20:5_34:0	Triglycerides	0.48	0.61	0.12	2.2	0.29	0.83	0.53	0.47	100	0.08757	30
TG 20:5_34:1	Triacylglyceride 20:5_34:1	Triglycerides	2.9	3.7	0.76	10	1.9	5.7	3.8	2.4	100	0.151	30
TG 20:5_34:2	Triacylglyceride 20:5_34:2	Triglycerides	2.2	3	0.69	10	1.4	4.2	2.9	2.1	100	0.179	30
TG 20:5_36:2	Triacylglyceride 20:5_36:2	Triglycerides	2	2.5	0.65	8.3	1.2	3.3	2.1	1.8	100	0.124	30
TG 20:5_36:3	Triacylglyceride 20:5_36:3	Triglycerides	2	2.8	0.6	10	1.3	3.9	2.6	2.1	97	0.117	30
TG 22:0_32:4	Triacylglyceride 22:0_32:4	Triglycerides									0	0.0639	30
TG 22:1_32:5	Triacylglyceride 22:1_32:5	Triglycerides			0.11	0.11					3.3	0.0503929	30
TG 22:2_32:4	Triacylglyceride 22:2_32:4	Triglycerides									0	0.039	30
TG 22:3_30:2	Triacylglyceride 22:3_30:2	Triglycerides			0.17	0.17					3.3	0.04003	30
TG 22:4_32:0	Triacylglyceride 22:4_32:0	Triglycerides	0.25	0.29	0.11	0.82	0.16	0.4	0.24	0.17	90	0.07104	30
TG 22:4_32:2	Triacylglyceride 22:4_32:2	Triglycerides	0.14	0.16	0.077	0.34	0.11	0.2	0.087	0.067	77	0.1105	30
TG 22:4_34:2	Triacylglyceride 22:4_34:2	Triglycerides	0.97	1.1	0.37	2.5	0.67	1.4	0.76	0.58	100	0.0876	30
TG 22:5_32:0	Triacylglyceride 22:5_32:0	Triglycerides	0.7	0.76	0.28	2.7	0.43	0.9	0.47	0.49	100	0.791	30
TG 22:5_32:1	Triacylglyceride 22:5_32:1	Triglycerides	0.65	0.78	0.25	1.9	0.46	1.1	0.64	0.42	100	0.775	30
TG 22:5_34:1	Triacylglyceride 22:5_34:1	Triglycerides	4.4	4.5	1.6	12	2.8	5.5	2.6	2.2	100	0.168	30
TG 22:5_34:2	Triacylglyceride 22:5_34:2	Triglycerides	3.6	4	1.4	8.7	2.5	4.8	2.4	1.8	100	0.071	30
TG 22:5_34:3	Triacylglyceride 22:5_34:3	Triglycerides	0.7	0.78	0.33	1.8	0.52	0.89	0.38	0.37	100	0.099	30
TG 22:6_32:0	Triacylglyceride 22:6_32:0	Triglycerides	1.2	1.4	0.25	4	0.63	2.3	1.7	0.99	100	0.08105	30
TG 22:6_32:1	Triacylglyceride 22:6_32:1	Triglycerides	1.5	1.5	0.3	3.1	0.65	2.2	1.5	0.84	100	0.072975	30
TG 22:6_34:1	Triacylglyceride 22:6_34:1	Triglycerides	8.8	8.3	1.6	17	5	11	6.3	4.1	100	0.126	30
TG 22:6_34:2	Triacylglyceride 22:6_34:2	Triglycerides	7.2	7.3	1.3	17	4	9.9	5.9	4	100	0.03057	30
TG 22:6_34:3	Triacylglyceride 22:6_34:3	Triglycerides	1.5	1.6	0.36	3.7	0.81	1.9	1.1	0.88	100	0.025	30
Hex3Cer d18:1/16:0	Trihexosylceramide d18:1/16:0	Trihexosylceramides	1.6	1.7	0.88	3.4	1.4	2	0.59	0.52	100	0.023	30
Hex3Cer d18:1/18:0	Trihexosylceramide d18:1/18:0	Trihexosylceramides	0.17	0.2	0.1	0.52	0.15	0.24	0.087	0.088	100	0.061	30
Hex3Cer d18:1/20:0	Trihexosylceramide d18:1/20:0	Trihexosylceramides									0	0.158	30
Hex3Cer d18:1/22:0	Trihexosylceramide d18:1/22:0	Trihexosylceramides	0.17	0.21	0.061	0.52	0.13	0.27	0.13	0.11	100	0.01739	30
Hex3Cer d18:1/24:1	Trihexosylceramide d18:1/24:1	Trihexosylceramides	0.66	0.76	0.36	1.7	0.6	0.87	0.27	0.27	100	0.26	30
Hex3Cer d18:1/26:1	Trihexosylceramide d18:1/26:1	Trihexosylceramides	0.055	0.058	0.035	0.11	0.048	0.067	0.018	0.016	83	0.017	30
Choline	Choline	Vitamins and Cofactors	16	17	10	25	13	20	7	4.1	100	0.26	30
Disclaimer:
The reference ranges do not represent a diagnosis but serve as a means of comparison only. A reference range provides no statement about whether a person is sick or healthy.
Individuals with metabolite concentrations outside the range can therefore be healthy and individuals with metabolite concentrations in the reference range can be ill.

## Sheet: Black-female-80s
Quantitative metabolomics database (QMDB)
Selected matrix:	human plasma
Assay:	MxP® Quant 500
Age:	80 to 89
Gender:	f
Ethnicity:	Black or African American
Samples found matching the preferences	28
Short Name	Metabolite	Class	Median [µM]	Mean [µM]	Min [µM]	Max [µM]	1st quartile [µM]	3rd quartile [µM]	Interquartal range [µM]	Standard deviation	% of samples > LOD	Typical LOD [µM]	No of samples
C0	Carnitine	Acylcarnitines	45	44	22	68	37	50	13	11	100	1.5065	28
C2	Acetylcarnitine	Acylcarnitines	6.5	6.3	4.2	9.7	4.9	7.1	2.2	1.5	100	0.060515	28
C3	Propionylcarnitine	Acylcarnitines	0.38	0.38	0.17	0.61	0.29	0.43	0.14	0.12	100	0.098	28
C3-DC (C4-OH)	Malonylcarnitine (Hydroxybutyrylcarnitine)	Acylcarnitines	0.084	0.085	0.044	0.12	0.061	0.11	0.049	0.025	46	0.057	28
C3-OH	Hydroxypropionylcarnitine	Acylcarnitines									0	0.363	28
C3:1	Propenoylcarnitine	Acylcarnitines	0.02	0.021	0.01	0.038	0.013	0.029	0.017	0.0099	21	0.0362	28
C4	Butyrylcarnitine	Acylcarnitines	0.2	0.21	0.09	0.51	0.13	0.25	0.12	0.099	100	0.0604	28
C4:1	Butenylcarnitine	Acylcarnitines									0	0.054	28
C5	Valerylcarnitine	Acylcarnitines	0.12	0.12	0.059	0.23	0.097	0.14	0.041	0.041	100	0.0504	28
C5-DC (C6-OH)	Glutarylcarnitine (Hydroxyhexanoylcarnitine)	Acylcarnitines									0	0.09628	28
C5-M-DC	Methylglutarylcarnitine	Acylcarnitines									0	0.06872	28
C5-OH (C3-DC-M)	Hydroxyvalerylcarnitine (Methylmalonylcarnitine)	Acylcarnitines	0.076	0.076	0.046	0.1	0.063	0.091	0.028	0.016	39	0.1	28
C5:1	Tiglylcarnitine	Acylcarnitines			0.01	0.01					3.6	0.04377	28
C5:1-DC	Glutaconylcarnitine	Acylcarnitines	0.064	0.064	0.039	0.089				0.036	7.1	0.0423541	28
C6 (C4:1-DC)	Hexanoylcarnitine (Fumarylcarnitine)	Acylcarnitines	0.079	0.074	0.039	0.11	0.051	0.086	0.035	0.022	39	0.153	28
C6:1	Hexenoylcarnitine	Acylcarnitines			0.044	0.044					3.6	0.09068	28
C7-DC	Pimelylcarnitine	Acylcarnitines	0.04	0.037	0.0056	0.067	0.019	0.048	0.029	0.019	39	0.060255	28
C8	Octanoylcarnitine	Acylcarnitines	0.14	0.17	0.054	0.37	0.1	0.22	0.12	0.094	46	0.223	28
C9	Nonanoylcarnitine	Acylcarnitines	0.054	0.057	0.039	0.081	0.043	0.077	0.034	0.015	39	0.028	28
C10	Decanoylcarnitine	Acylcarnitines	0.28	0.3	0.15	0.61	0.21	0.35	0.13	0.11	93	0.1295	28
C10:1	Decenoylcarnitine	Acylcarnitines									0	0.4035	28
C10:2	Decadienoylcarnitine	Acylcarnitines	0.083	0.082	0.048	0.11	0.064	0.096	0.032	0.021	39	0.1085	28
C12	Dodecanoylcarnitine	Acylcarnitines	0.085	0.11	0.051	0.25	0.071	0.14	0.074	0.052	54	0.072	28
C12-DC	Dodecanedioylcarnitine	Acylcarnitines									0	1.019	28
C12:1	Dodecenoylcarnitine	Acylcarnitines			0.21	0.21					3.6	0.109	28
C14	Tetradecanoylcarnitine	Acylcarnitines	0.036	0.035	0.029	0.038	0.033	0.037	0.0045	0.0031	29	0.0599	28
C14:1	Tetradecenoylcarnitine	Acylcarnitines	0.064	0.074	0.046	0.19	0.058	0.081	0.023	0.031	89	0.0349	28
C14:1-OH	Hydroxytetradecenoylcarnitine	Acylcarnitines	0.032	0.033	0.027	0.044	0.03	0.035	0.0049	0.0045	39	0.035385	28
C14:2	Tetradecadienoylcarnitine	Acylcarnitines	0.076	0.082	0.054	0.13	0.067	0.096	0.029	0.023	39	0.0322	28
C14:2-OH	Hydroxytetradecadienoylcarnitine	Acylcarnitines	0.018	0.018	0.015	0.024	0.017	0.02	0.0029	0.0025	32	0.031	28
C16	Hexadecanoylcarnitine	Acylcarnitines	0.11	0.11	0.076	0.14	0.11	0.13	0.025	0.017	39	0.088	28
C16-OH	Hydroxyhexadecanoylcarnitine	Acylcarnitines									0	0.077	28
C16:1	Hexadecenoylcarnitine	Acylcarnitines	0.062	0.065	0.039	0.086	0.058	0.077	0.019	0.014	39	0.05	28
C16:1-OH	Hydroxyhexadecenoylcarnitine	Acylcarnitines									0	0.039895	28
C16:2	Hexadecadienoylcarnitine	Acylcarnitines	0.016	0.016	0.015	0.017	0.015	0.017	0.0022	0.0011	14	0.02942	28
C16:2-OH	Hydroxyhexadecadienoylcarnitine	Acylcarnitines	0.01	0.01	0.0091	0.012	0.0094	0.01	0.0008	0.001	29	0.041045	28
C18	Octadecanoylcarnitine	Acylcarnitines	0.042	0.05	0.033	0.1	0.04	0.05	0.0099	0.02	46	0.02201	28
C18:1	Octadecenoylcarnitine	Acylcarnitines	0.2	0.2	0.14	0.27	0.17	0.23	0.059	0.034	75	0.082855	28
C18:1-OH	Hydroxyoctadecenoylcarnitine	Acylcarnitines			0.076	0.076					3.6	0.0687	28
C18:2	Octadecadienoylcarnitine	Acylcarnitines	0.12	0.12	0.065	0.19	0.09	0.15	0.061	0.036	100	0.0347	28
Trigonelline	Trigonelline	Alkaloids	0.52	0.79	0.11	3.4	0.23	1.1	0.83	0.8	96	0.042595	28
TMAO	Trimethylamine N-oxide	Amine Oxides	5.1	7.2	2	30	3.2	9.4	6.2	5.9	100	0.108	28
1-Met-His	1-Methylhistidine	Amino Acid Related	7.1	7.7	4.4	13	5.8	9.6	3.8	2.5	100	0.01	28
3-Met-His	3-Methylhistidine	Amino Acid Related	9.7	15	1.8	48	6.3	22	16	12	100	0.01	28
5-AVA	5-Aminovaleric acid	Amino Acid Related	0.058	0.064	0.037	0.13	0.047	0.076	0.029	0.026	71	0.04	28
AABA	alpha-Aminobutyric acid	Amino Acid Related	18	18	9.9	36	14	21	7.4	6.3	100	0.435	28
Ac-Orn	Acetylornithine	Amino Acid Related									0	0.065	28
ADMA	Asymmetric dimethylarginine	Amino Acid Related	0.57	0.58	0.41	0.88	0.51	0.62	0.11	0.098	100	0.08	28
alpha-AAA	alpha-Aminoadipic acid	Amino Acid Related	0.73	0.74	0.33	2	0.52	0.86	0.34	0.33	100	0.3	28
Anserine	L-Anserine	Amino Acid Related	0.018	0.034	0.014	0.069	0.014			0.03	11	0.01	28
BABA	beta-Aminobutyric acid	Amino Acid Related	0.077	0.074	0.04	0.1	0.055	0.092	0.037	0.022	21	0.03	28
Betaine	Betaine	Amino Acid Related	33	36	17	71	23	44	21	15	100	0.2	28
c4-OH-Pro	cis-4-Hydroxyproline	Amino Acid Related			0.072	0.072					3.6	0.3	28
Carnosine	Carnosine	Amino Acid Related									0	0.2	28
Cit	Citrulline	Amino Acid Related	45	46	28	78	36	55	19	12	100	1	28
Creatinine	Creatinine	Amino Acid Related	78	80	48	130	71	85	14	17	100	3.85	28
Cystine	Cystine	Amino Acid Related	51	53	26	99	42	64	22	15	100	0.07489	28
DOPA	Dihydroxyphenylalanine	Amino Acid Related	0.032	0.031	0.012	0.043	0.023	0.039	0.016	0.011	32	0.148	28
HArg	Homoarginine	Amino Acid Related	2.6	2.7	1.4	4.4	2.1	3.2	1.1	0.78	100	0.01	28
HCys	Homocysteine	Amino Acid Related	7	7.3	4	14	5.9	8	2.1	2.2	100	0.266	28
Kynurenine	Kynurenine	Amino Acid Related	2.1	2.2	1.5	3.7	1.7	2.4	0.75	0.56	100	0.2265	28
Met-SO	Methionine-Sulfoxide	Amino Acid Related	0.65	0.7	0.35	1.9	0.52	0.76	0.23	0.31	100	0.1	28
Nitro-Tyr	Nitrotyrosine	Amino Acid Related									0	0.3	28
Orn	Ornithine	Amino Acid Related	118	124	70	184	97	157	60	34	100	1	28
PAG	Phenylacetylglycine	Amino Acid Related									0	0.01	28
PheAlaBetaine	Phenylalanine betaine	Amino Acid Related	0.018	0.018	0.012	0.026	0.013	0.023	0.0097	0.0055	18	0.01	28
ProBetaine	Proline betaine	Amino Acid Related	6	11	0.36	103	2.2	11	8.9	20	100	0.061	28
Sarcosine	Sarcosine	Amino Acid Related	4.2	4.4	2.4	6.9	3.4	5.1	1.7	1.3	100	0.1855	28
SDMA	Symmetric dimethylarginine	Amino Acid Related	0.6	0.64	0.38	1	0.51	0.71	0.19	0.16	100	0.02	28
t4-OH-Pro	trans-4-Hydroxyproline	Amino Acid Related	15	15	7.5	40	9.8	17	7.1	6.8	100	0.382	28
Taurine	Taurine	Amino Acid Related	78	85	44	176	58	100	42	31	100	0.363	28
TrpBetaine	Tryptophan betaine	Amino Acid Related	0.37	0.63	0.021	1.7	0.17	1.2	1	0.55	96	0.00811	28
Ala	Alanine	Amino Acids	403	423	255	625	367	481	114	84	100	2.4075	28
Arg	Arginine	Amino Acids	68	72	42	108	60	83	23	17	100	0.987	28
Asn	Asparagine	Amino Acids	53	54	39	73	48	61	13	9	100	0.5225	28
Asp	Aspartic Acid	Amino Acids	7.5	8.4	2.8	18	6	11	4.6	3.5	100	1.0305	28
Cys	Cysteine	Amino Acids	80	79	56	104	68	90	22	15	100	0.1	28
Gln	Glutamine	Amino Acids	688	693	455	1051	638	758	120	113	100	3.45	28
Glu	Glutamic Acid	Amino Acids	56	59	29	124	42	66	24	25	100	2.662	28
Gly	Glycine	Amino Acids	374	387	266	646	300	445	145	103	100	4.7	28
His	Histidine	Amino Acids	84	86	66	117	77	93	15	13	100	1.1	28
Ile	Isoleucine	Amino Acids	66	70	54	124	58	75	17	15	100	0.759	28
Leu	Leucine	Amino Acids	122	127	94	187	113	141	28	22	100	1.095	28
Lys	Lysine	Amino Acids	190	198	128	279	177	228	51	33	100	1.4	28
Met	Methionine	Amino Acids	29	31	22	42	26	35	8.9	5.3	100	0.8055	28
Phe	Phenylalanine	Amino Acids	65	67	54	95	59	75	16	10	100	0.8685	28
Pro	Proline	Amino Acids	189	193	134	279	155	227	72	40	100	2.07	28
Ser	Serine	Amino Acids	118	115	68	158	101	125	24	22	100	1.55	28
Thr	Threonine	Amino Acids	149	149	77	215	129	177	48	34	100	0.9225	28
Trp	Tryptophan	Amino Acids	56	58	41	84	52	65	13	10	100	0.792	28
Tyr	Tyrosine	Amino Acids	76	77	51	119	66	85	19	15	100	0.4925	28
Val	Valine	Amino Acids	215	220	163	301	202	234	32	33	100	1.048	28
CA	Cholic Acid	Bile Acids	0.035	0.095	0.0083	0.4	0.022	0.14	0.12	0.12	86	0.003	28
CDCA	Chenodeoxycholic acid	Bile Acids	0.097	0.23	0.016	1.3	0.067	0.27	0.2	0.31	71	0.02	28
DCA	Deoxycholic acid	Bile Acids	0.32	0.35	0.0081	1.4	0.2	0.41	0.21	0.29	96	0.0081	28
GCA	Glycocholic acid	Bile Acids	0.21	0.27	0.052	1.3	0.092	0.39	0.29	0.27	100	0.00429	28
GCDCA	Glycochenodeoxycholic acid	Bile Acids	0.47	0.56	0.057	2.1	0.25	0.6	0.35	0.48	100	0.002	28
GDCA	Glycodeoxycholic acid	Bile Acids	0.23	0.45	0.011	1.9	0.15	0.73	0.58	0.49	96	0.0016736	28
GLCA	Glycolithocholic acid	Bile Acids	0.012	0.019	0.0067	0.05	0.0097	0.027	0.017	0.012	71	0.003565	28
GLCAS	Glycolithocholic acid sulfate	Bile Acids	0.31	0.34	0.012	0.94	0.22	0.43	0.21	0.21	96	0.0034	28
GUDCA	Glycoursodeoxycholic acid	Bile Acids	0.056	0.11	0.013	0.62	0.026	0.13	0.11	0.14	96	0.0019	28
TCA	Taurocholic acid	Bile Acids	0.055	0.08	0.0063	0.27	0.036	0.11	0.076	0.07	86	0.005	28
TCDCA	Taurochenodeoxycholic acid	Bile Acids	0.098	0.15	0.017	0.76	0.045	0.18	0.14	0.16	96	0.004085	28
TDCA	Taurodeoxycholic acid	Bile Acids	0.087	0.12	0.0057	0.46	0.034	0.19	0.16	0.12	86	0.004	28
TLCA	Taurolithocholic acid	Bile Acids	0.0043	0.0053	0.0013	0.013	0.0037	0.006	0.0023	0.0031	54	0.002	28
TMCA	Tauro-muricholic acids	Bile Acids	0.011	0.023	0.0034	0.11	0.0066	0.033	0.027	0.026	82	0.002	28
beta-Ala	beta-Alanine	Biogenic Amines	3	3.3	1.9	5.8	2.3	4.3	2	1.1	100	0.11	28
Dopamine	Dopamine	Biogenic Amines									0	0.2315	28
GABA	gamma-Aminobutyric acid	Biogenic Amines	0.21	0.22	0.18	0.27	0.2	0.23	0.034	0.025	100	0.04652	28
Histamine	Histamine	Biogenic Amines			0.12	0.12					3.6	0.429	28
PEA	Phenylethylamine	Biogenic Amines									0	0.001	28
Putrescine	Putrescine	Biogenic Amines	0.14	0.15	0.07	0.36	0.11	0.18	0.073	0.062	93	0.0624	28
Serotonin	Serotonin	Biogenic Amines	0.16	0.28	0.012	1.3	0.077	0.38	0.3	0.32	75	0.04	28
Spermidine	Spermidine	Biogenic Amines	0.2	0.23	0.14	0.41	0.16	0.3	0.14	0.09	32	0.2	28
Spermine	Spermine	Biogenic Amines	0.19	0.21	0.17	0.32	0.18	0.23	0.043	0.047	32	0.2	28
Hexose	Hexose	Carbohydrates and Related	4602	4672	3367	6861	4096	4986	890	766	100	88.1885	28
AconAcid	Aconitic acid	Carboxylic Acids	13	14	8.7	23	11	16	5.2	3.7	100	0.2667	28
DiCA(12:0)	Dodecanedioic acid	Carboxylic Acids									0	0.1595	28
DiCA(14:0)	Tetradecanedioic acid	Carboxylic Acids									0	0.09969	28
HipAcid	Hippuric acid	Carboxylic Acids	8.1	9.3	1.2	29	3	14	11	6.8	100	0.5	28
Lac	Lactic acid	Carboxylic Acids	4604	4675	2791	7187	3936	5338	1402	1133	100	143.401	28
OH-GlutAcid	Hydroxyglutaric acid	Carboxylic Acids									0	6.942	28
Suc	Succinic acid	Carboxylic Acids									0	20.851	28
Cer d16:1/18:0	Ceramide d16:1/18:0	Ceramides	0.11	0.12	0.057	0.26	0.075	0.14	0.069	0.052	86	0.025875	28
Cer d16:1/20:0	Ceramide d16:1/20:0	Ceramides	0.12	0.12	0.053	0.23	0.08	0.15	0.071	0.044	100	0.01891	28
Cer d16:1/22:0	Ceramide d16:1/22:0	Ceramides	0.36	0.38	0.17	0.77	0.28	0.43	0.15	0.14	100	0.0694	28
Cer d16:1/23:0	Ceramide d16:1/23:0	Ceramides	0.18	0.19	0.08	0.47	0.12	0.2	0.079	0.087	100	0.033	28
Cer d16:1/24:0	Ceramide d16:1/24:0	Ceramides	0.2	0.23	0.1	0.54	0.16	0.29	0.13	0.11	100	0.01336	28
Cer d18:1/14:0	Ceramide d18:1/14:0	Ceramides	0.087	0.094	0.055	0.14	0.08	0.11	0.03	0.022	64	0.04241	28
Cer d18:1/16:0	Ceramide d18:1/16:0	Ceramides	0.49	0.53	0.34	1.1	0.45	0.62	0.16	0.14	100	0.011415	28
Cer d18:1/18:0	Ceramide d18:1/18:0	Ceramides	0.2	0.22	0.14	0.4	0.16	0.23	0.067	0.072	100	0.00978	28
Cer d18:1/18:0-OH	Ceramide d18:1/18:0-OH	Ceramides	0.39	0.39	0.22	0.54	0.22			0.16	11	0.2945	28
Cer d18:1/18:1	Ceramide d18:1/18:1	Ceramides	0.034	0.038	0.024	0.082	0.028	0.043	0.015	0.016	39	0.0271351	28
Cer d18:1/20:0	Ceramide d18:1/20:0	Ceramides	0.15	0.15	0.092	0.24	0.13	0.17	0.04	0.032	100	0.007175	28
Cer d18:1/20:0-OH	Ceramide d18:1/20:0-OH	Ceramides	0.5	0.51	0.22	1.2	0.32	0.65	0.33	0.24	64	0.239	28
Cer d18:1/22:0	Ceramide d18:1/22:0	Ceramides	0.9	0.94	0.59	1.9	0.8	1	0.24	0.25	100	0.010545	28
Cer d18:1/23:0	Ceramide d18:1/23:0	Ceramides	1.1	1.1	0.62	2	0.88	1.3	0.4	0.3	100	0.012515	28
Cer d18:1/24:0	Ceramide d18:1/24:0	Ceramides	2.5	2.6	1.4	5.1	2.1	3	0.88	0.74	100	0.02399	28
Cer d18:1/24:1	Ceramide d18:1/24:1	Ceramides	1.3	1.3	0.83	2.3	1.1	1.5	0.39	0.34	100	0.011975	28
Cer d18:1/25:0	Ceramide d18:1/25:0	Ceramides	0.53	0.55	0.31	0.99	0.42	0.61	0.19	0.15	100	0.066815	28
Cer d18:1/26:0	Ceramide d18:1/26:0	Ceramides	0.1	0.11	0.055	0.2	0.089	0.12	0.036	0.035	100	0.024	28
Cer d18:1/26:1	Ceramide d18:1/26:1	Ceramides	0.035	0.04	0.019	0.079	0.029	0.044	0.015	0.015	100	0.0119	28
Cer d18:2/14:0	Ceramide d18:2/14:0	Ceramides	0.021	0.021	0.02	0.021				0.0008	7.1	0.01116	28
Cer d18:2/16:0	Ceramide d18:2/16:0	Ceramides	0.13	0.13	0.085	0.27	0.11	0.15	0.033	0.036	100	0.049	28
Cer d18:2/18:0	Ceramide d18:2/18:0	Ceramides	0.1	0.11	0.057	0.2	0.089	0.13	0.037	0.036	100	0.029	28
Cer d18:2/18:1	Ceramide d18:2/18:1	Ceramides	0.019	0.026	0.016	0.043	0.018	0.042	0.024	0.012	25	0.01462	28
Cer d18:2/20:0	Ceramide d18:2/20:0	Ceramides	0.092	0.093	0.059	0.15	0.073	0.1	0.032	0.022	100	0.025	28
Cer d18:2/22:0	Ceramide d18:2/22:0	Ceramides	0.34	0.34	0.18	0.63	0.28	0.41	0.12	0.097	100	0.011245	28
Cer d18:2/23:0	Ceramide d18:2/23:0	Ceramides	0.17	0.18	0.11	0.3	0.16	0.2	0.04	0.044	100	0.041	28
Cer d18:2/24:0	Ceramide d18:2/24:0	Ceramides	0.6	0.62	0.35	1.1	0.48	0.71	0.23	0.18	100	0.00689	28
Cer d18:2/24:1	Ceramide d18:2/24:1	Ceramides	0.28	0.3	0.18	0.51	0.23	0.34	0.11	0.08	100	0.005	28
CE 14:0	Cholesteryl ester 14:0	Cholesteryl Esters	11	12	6.3	35	8.1	15	7	6	100	0.3075	28
CE 14:1	Cholesteryl ester 14:1	Cholesteryl Esters	0.13	0.11	0.047	0.15	0.09	0.14	0.053	0.034	32	0.144	28
CE 15:0	Cholesteryl ester 15:0	Cholesteryl Esters	4.3	5.1	2.3	12	3.7	6.1	2.4	2.5	100	1.39	28
CE 15:1	Cholesteryl ester 15:1	Cholesteryl Esters	0.72	0.76	0.49	1.1	0.61	0.89	0.28	0.17	39	0.507	28
CE 16:0	Cholesteryl ester 16:0	Cholesteryl Esters	177	190	129	385	153	198	45	60	100	0.938	28
CE 16:1	Cholesteryl ester 16:1	Cholesteryl Esters	31	39	16	110	23	45	22	23	100	9.92	28
CE 17:0	Cholesteryl ester 17:0	Cholesteryl Esters	4.1	4.6	1.7	13	3.2	5.1	1.9	2.3	100	1.25	28
CE 17:1	Cholesteryl ester 17:1	Cholesteryl Esters	2.6	3.1	1.5	7.4	2.2	4.3	2.2	1.5	96	1.06	28
CE 18:0	Cholesteryl ester 18:0	Cholesteryl Esters	11	13	8.1	30	10	13	3.4	4.8	100	0.29215	28
CE 18:1	Cholesteryl ester 18:1	Cholesteryl Esters	243	276	134	612	221	299	78	99	100	1.3125	28
CE 18:2	Cholesteryl ester 18:2	Cholesteryl Esters	1204	1269	621	2633	996	1451	455	394	100	14.28	28
CE 18:3	Cholesteryl ester 18:3	Cholesteryl Esters	52	56	30	116	39	64	25	23	100	0.226	28
CE 20:0	Cholesteryl ester 20:0	Cholesteryl Esters	2.4	2.8	2.1	5.6	2.1	2.9	0.74	1.1	32	4.413	28
CE 20:1	Cholesteryl ester 20:1	Cholesteryl Esters	0.61	0.85	0.34	2.2	0.49	1.1	0.56	0.62	43	0.618	28
CE 20:3	Cholesteryl ester 20:3	Cholesteryl Esters	17	21	12	66	14	23	8.4	11	100	0.183	28
CE 20:4	Cholesteryl ester 20:4	Cholesteryl Esters	287	293	127	737	214	352	137	124	100	0.549	28
CE 20:5	Cholesteryl ester 20:5	Cholesteryl Esters	83	101	20	301	40	147	107	73	100	0.4255	28
CE 22:0	Cholesteryl ester 22:0	Cholesteryl Esters			0.91	0.91					3.6	0.108	28
CE 22:1	Cholesteryl ester 22:1	Cholesteryl Esters	0.1	0.11	0.092	0.15	0.094	0.14	0.045	0.024	18	0.147	28
CE 22:2	Cholesteryl ester 22:2	Cholesteryl Esters	0.065	0.19	0.048	0.97	0.054	0.14	0.083	0.29	43	0.169	28
CE 22:5	Cholesteryl ester 22:5	Cholesteryl Esters	2.3	2.7	1.3	8.7	1.9	3.1	1.1	1.4	100	0.88	28
CE 22:6	Cholesteryl ester 22:6	Cholesteryl Esters	44	50	22	112	35	62	27	23	100	0.3	28
p-Cresol-SO4	p-Cresol sulfate	Cresols	53	56	21	136	41	63	23	24	100	0.01	28
DG 14:0_14:0	Diacylglyceride 14:0_14:0	Diglycerides			1.2	1.2					3.6	0.3475	28
DG 14:0_18:1	Diacylglyceride 14:0_18:1	Diglycerides									0	0.6975	28
DG 14:0_18:2	Diacylglyceride 14:0_18:2	Diglycerides	0.52	0.58	0.3	1	0.33	0.8	0.47	0.28	29	0.334	28
DG 14:0_20:0	Diacylglyceride 14:0_20:0	Diglycerides			0.001	0.001					3.6	0.0698	28
DG 14:1_18:1	Diacylglyceride 14:1_18:1	Diglycerides	0.17	0.17	0.14	0.2				0.047	7.1	0.09721	28
DG 14:1_20:2	Diacylglyceride 14:1_20:2	Diglycerides	0.018	0.016	0.0025	0.027	0.0046	0.027	0.022	0.012	14	0.1135	28
DG 16:0_16:0	Diacylglyceride 16:0_16:0	Diglycerides									0	23.3	28
DG 16:0_16:1	Diacylglyceride 16:0_16:1	Diglycerides	0.42	0.4	0.34	0.44	0.35	0.44	0.089	0.046	18	0.2565	28
DG 16:0_18:1	Diacylglyceride 16:0_18:1	Diglycerides	1.9	2	0.71	4.6	1.4	2.5	1.1	0.89	89	0.573	28
DG 16:0_18:2	Diacylglyceride 16:0_18:2	Diglycerides	1.4	1.5	0.59	3.6	1	2	1	0.71	96	0.48	28
DG 16:0_20:0	Diacylglyceride 16:0_20:0	Diglycerides									0	0.9455	28
DG 16:0_20:3	Diacylglyceride 16:0_20:3	Diglycerides	0.097	0.12	0.096	0.18	0.096			0.05	11	0.1155	28
DG 16:0_20:4	Diacylglyceride 16:0_20:4	Diglycerides	0.23	0.23	0.015	0.44				0.3	7.1	0.189	28
DG 16:1_18:0	Diacylglyceride 16:1_18:0	Diglycerides	0.08	0.075	0.058	0.087	0.058			0.016	11	0.125	28
DG 16:1_18:1	Diacylglyceride 16:1_18:1	Diglycerides	1.2	1.1	0.33	2.7	0.45	1.5	1.1	0.74	43	0.4415	28
DG 16:1_18:2	Diacylglyceride 16:1_18:2	Diglycerides	0.41	0.52	0.22	2.2	0.3	0.5	0.2	0.41	100	0.151	28
DG 16:1_20:0	Diacylglyceride 16:1_20:0	Diglycerides			0.25	0.25					3.6	0.234	28
DG 17:0_17:1	Diacylglyceride 17:0_17:1	Diglycerides	0.022	0.025	0.0064	0.047	0.02	0.033	0.014	0.012	25	0.107	28
DG 17:0_18:1	Diacylglyceride 17:0_18:1	Diglycerides	0.46	0.56	0.32	1.7	0.4	0.58	0.18	0.28	100	0.188	28
DG 18:0_20:0	Diacylglyceride 18:0_20:0	Diglycerides			0.06	0.06					3.6	0.417	28
DG 18:0_20:4	Diacylglyceride 18:0_20:4	Diglycerides									0	0.1225	28
DG 18:1_18:1	Diacylglyceride 18:1_18:1	Diglycerides	1.8	2.1	0.52	5.7	1.3	2.7	1.3	1.2	100	0.516	28
DG 18:1_18:2	Diacylglyceride 18:1_18:2	Diglycerides	5.1	6.4	3	23	3.5	7.3	3.8	4.4	100	1.63	28
DG 18:1_18:3	Diacylglyceride 18:1_18:3	Diglycerides	0.36	0.48	0.32	1	0.33	0.7	0.37	0.29	18	0.339	28
DG 18:1_18:4	Diacylglyceride 18:1_18:4	Diglycerides									0	0.17015	28
DG 18:1_20:0	Diacylglyceride 18:1_20:0	Diglycerides			0.36	0.36					3.6	0.271	28
DG 18:1_20:1	Diacylglyceride 18:1_20:1	Diglycerides	0.031	0.031	0.024	0.038				0.01	7.1	0.0322042	28
DG 18:1_20:2	Diacylglyceride 18:1_20:2	Diglycerides	0.25	0.25	0.12	0.38	0.19	0.31	0.13	0.081	32	0.119	28
DG 18:1_20:3	Diacylglyceride 18:1_20:3	Diglycerides	0.12	0.13	0.051	0.23	0.052	0.21	0.16	0.082	18	0.07755	28
DG 18:1_20:4	Diacylglyceride 18:1_20:4	Diglycerides	0.55	0.69	0.54	0.99	0.54			0.26	11	0.185	28
DG 18:1_22:5	Diacylglyceride 18:1_22:5	Diglycerides	0.0091	0.011	0.0079	0.015	0.0079			0.0037	11	0.0133982	28
DG 18:1_22:6	Diacylglyceride 18:1_22:6	Diglycerides	0.21	0.21	0.17	0.25				0.056	7.1	0.29595	28
DG 18:2_18:2	Diacylglyceride 18:2_18:2	Diglycerides	3.8	4.6	1.3	21	2.6	5.1	2.4	3.9	100	0.605	28
DG 18:2_18:3	Diacylglyceride 18:2_18:3	Diglycerides	0.36	0.46	0.2	1.5	0.3	0.55	0.25	0.28	79	0.152	28
DG 18:2_18:4	Diacylglyceride 18:2_18:4	Diglycerides									0	0.1419	28
DG 18:2_20:0	Diacylglyceride 18:2_20:0	Diglycerides	0.12	0.13	0.097	0.18	0.11	0.17	0.061	0.033	18	0.122	28
DG 18:2_20:4	Diacylglyceride 18:2_20:4	Diglycerides	0.23	0.23	0.16	0.3				0.1	7.1	0.1805	28
DG 18:3_18:3	Diacylglyceride 18:3_18:3	Diglycerides			0.32	0.32					3.6	0.1605	28
DG 18:3_20:2	Diacylglyceride 18:3_20:2	Diglycerides									0	0.176	28
DG 21:0_22:6	Diacylglyceride 21:0_22:6	Diglycerides	0.0041	0.0041	0.0032	0.005				0.0013	7.1	0.407	28
DG 22:1_22:2	Diacylglyceride 22:1_22:2	Diglycerides	0.0014	0.0014	0.0012	0.0016	0.0012			0.0002	11	0.1235	28
DG O-14:0_18:2	Diacylglyceride O-14:0_18:2	Diglycerides									0	0.804	28
DG O-16:0_18:1	Diacylglyceride O-16:0_18:1	Diglycerides			0.034	0.034					3.6	0.1255	28
DG O-16:0_20:4	Diacylglyceride O-16:0_20:4	Diglycerides									0	0.0461062	17
DG O-18:2_18:2	Diacylglyceride O-18:2_18:2	Diglycerides			0.067	0.067					9.1	0.0829	11
Hex2Cer d18:1/14:0	Dihexosylceramide d18:1/14:0	Dihexosylceramides	0.26	0.27	0.14	0.47	0.21	0.32	0.11	0.081	100	0.0259557	28
Hex2Cer d18:1/16:0	Dihexosylceramide d18:1/16:0	Dihexosylceramides	2.9	3	1.8	6.6	2.4	3.5	1.1	0.96	100	0.01082	28
Hex2Cer d18:1/18:0	Dihexosylceramide d18:1/18:0	Dihexosylceramides	0.32	0.32	0.18	0.53	0.24	0.36	0.12	0.079	100	0.0339	28
Hex2Cer d18:1/20:0	Dihexosylceramide d18:1/20:0	Dihexosylceramides	0.16	0.17	0.1	0.28	0.13	0.21	0.072	0.043	100	0.105	28
Hex2Cer d18:1/22:0	Dihexosylceramide d18:1/22:0	Dihexosylceramides	0.31	0.33	0.19	0.52	0.27	0.4	0.13	0.091	100	0.077	28
Hex2Cer d18:1/24:0	Dihexosylceramide d18:1/24:0	Dihexosylceramides	0.26	0.26	0.14	0.54	0.21	0.3	0.082	0.084	100	0.133	28
Hex2Cer d18:1/24:1	Dihexosylceramide d18:1/24:1	Dihexosylceramides	0.45	0.48	0.26	0.91	0.36	0.58	0.22	0.16	100	0.003615	28
Hex2Cer d18:1/26:0	Dihexosylceramide d18:1/26:0	Dihexosylceramides	0.013	0.013	0.0035	0.027	0.0076	0.016	0.0086	0.0067	39	0.006	28
Hex2Cer d18:1/26:1	Dihexosylceramide d18:1/26:1	Dihexosylceramides	0.019	0.021	0.0072	0.051	0.013	0.028	0.014	0.012	43	0.606	28
Cer d18:0/18:0	Dihydroceramide d18:0/18:0	Dihydroceramides	0.017	0.02	0.011	0.051	0.016	0.022	0.0057	0.011	39	0.03455	28
Cer d18:0/18:0-OH	Dihydroceramide d18:0/18:0-OH	Dihydroceramides			0.28	0.28					3.6	0.00583	28
Cer d18:0/20:0	Dihydroceramide d18:0/20:0	Dihydroceramides	0.0011	0.0015	0.0009	0.004	0.0009	0.0016	0.0007	0.0011	29	0.07019	28
Cer d18:0/22:0	Dihydroceramide d18:0/22:0	Dihydroceramides	0.2	0.21	0.12	0.34	0.18	0.22	0.046	0.059	43	0.097	28
Cer d18:0/24:0	Dihydroceramide d18:0/24:0	Dihydroceramides	0.31	0.33	0.14	0.57	0.26	0.39	0.12	0.1	100	0.093	28
Cer d18:0/24:1	Dihydroceramide d18:0/24:1	Dihydroceramides	0.27	0.28	0.15	0.57	0.23	0.32	0.094	0.093	100	0.402	28
Cer d18:0/26:1	Dihydroceramide d18:0/26:1	Dihydroceramides	0.06	0.064	0.021	0.11	0.021			0.044	11	0.8	28
Cer d18:0/26:1-OH	Dihydroceramide d18:0/26:1-OH	Dihydroceramides	0.058	0.39	0.023	2.9	0.035	0.17	0.13	0.96	32	0.035385	28
FA 12:0	Dodecanoic acid	Fatty Acids									0	228.567	28
FA 14:0	Myristic acid	Fatty Acids									0	738.192	28
FA 16:0	Palmitic acid	Fatty Acids									0	690.389	28
FA 18:0	Stearic acid	Fatty Acids									0	64	28
FA 18:1	Octadecenoic acid	Fatty Acids	183	203	78	334	158	243	85	67	96	3.4155	28
FA 18:2	Octadecadienoic acid	Fatty Acids	52	54	12	102	43	69	25	19	100	0.515	28
FA 20:1	Eicosenoic acid	Fatty Acids	2	2	0.64	3.7	1.6	2.4	0.79	0.68	100	0.6955	28
FA 20:2	Eicosadienoic acid	Fatty Acids	1.6	1.7	0.56	3.1	1.4	2.2	0.82	0.58	96	0.25	28
FA 20:3	Eicosatrienoic acid	Fatty Acids	0.7	0.72	0.4	1.4	0.48	0.86	0.38	0.25	93	0.0123	28
FA 20:4	Arachidonic acid	Fatty Acids	5.6	5.4	2.5	11	4	6.6	2.7	1.9	75	1.681	28
FA 20:5	Eicosapentaenoic acid	Fatty Acids	0.67	0.86	0.23	2.4	0.37	1.1	0.69	0.64	96	16.493	28
FA 22:6	Docosahexaenoic acid	Fatty Acids	7.6	8.5	2.3	18	6	11	4.8	3.8	100	0.117	28
Hex-Cer d16:1/20:0	Hexosylceramide d16:1/20:0	Hexosylceramides	0.047	0.047	0.033	0.058	0.041	0.055	0.014	0.0079	100	0.017	11
Hex-Cer d16:1/22:0	Hexosylceramide d16:1/22:0	Hexosylceramides	0.046	0.052	0.026	0.14	0.038	0.064	0.026	0.025	100	0.0148	28
Hex-Cer d16:1/24:0	Hexosylceramide d16:1/24:0	Hexosylceramides	0.036	0.043	0.015	0.12	0.032	0.046	0.014	0.021	86	0.02585	28
Hex-Cer d18:1/14:0	Hexosylceramide d18:1/14:0	Hexosylceramides	0.038	0.04	0.027	0.054	0.035	0.049	0.014	0.0088	46	0.0198	28
Hex-Cer d18:1/16:0	Hexosylceramide d18:1/16:0	Hexosylceramides	1.2	1.3	0.7	3.2	1	1.5	0.51	0.48	100	0.0707	28
Hex-Cer d18:1/18:0	Hexosylceramide d18:1/18:0	Hexosylceramides	0.21	0.22	0.097	0.5	0.16	0.24	0.075	0.081	100	0.0319	28
Hex-Cer d18:1/18:1	Hexosylceramide d18:1/18:1	Hexosylceramides	0.11	0.12	0.065	0.23	0.091	0.13	0.038	0.041	100	0.103	28
Hex-Cer d18:1/20:0	Hexosylceramide d18:1/20:0	Hexosylceramides	0.31	0.31	0.16	0.51	0.23	0.36	0.13	0.093	100	0.03776	28
Hex-Cer d18:1/22:0	Hexosylceramide d18:1/22:0	Hexosylceramides	3.2	3.4	1.7	6.7	2.5	3.9	1.4	1.2	100	0.03923	28
Hex-Cer d18:1/23:0	Hexosylceramide d18:1/23:0	Hexosylceramides	1.7	1.8	0.78	3.7	1.2	2.1	0.82	0.66	100	0.023905	28
Hex-Cer d18:1/24:0	Hexosylceramide d18:1/24:0	Hexosylceramides	1.8	1.8	0.93	3.5	1.3	2.1	0.83	0.62	100	0.1495	28
Hex-Cer d18:1/24:1	Hexosylceramide d18:1/24:1	Hexosylceramides	4.5	4.6	2.6	7.7	3.6	5.9	2.3	1.3	100	0.03788	28
Hex-Cer d18:1/26:0	Hexosylceramide d18:1/26:0	Hexosylceramides	0.093	0.1	0.064	0.14	0.084	0.12	0.038	0.023	82	0.050635	28
Hex-Cer d18:1/26:1	Hexosylceramide d18:1/26:1	Hexosylceramides	0.095	0.1	0.072	0.17	0.082	0.12	0.038	0.029	54	0.009915	28
Hex-Cer d18:2/16:0	Hexosylceramide d18:2/16:0	Hexosylceramides	0.015	0.015	0.011	0.021	0.014	0.017	0.003	0.0028	39	0.01368	28
Hex-Cer d18:2/18:0	Hexosylceramide d18:2/18:0	Hexosylceramides	0.033	0.039	0.025	0.079	0.029	0.047	0.018	0.014	100	0.014665	28
Hex-Cer d18:2/20:0	Hexosylceramide d18:2/20:0	Hexosylceramides	0.017	0.017	0.014	0.027	0.015	0.019	0.0038	0.0035	39	0.176	28
Hex-Cer d18:2/22:0	Hexosylceramide d18:2/22:0	Hexosylceramides	0.73	0.78	0.44	1.5	0.6	0.94	0.33	0.26	100	0.0856	28
Hex-Cer d18:2/23:0	Hexosylceramide d18:2/23:0	Hexosylceramides	0.4	0.44	0.19	1.2	0.35	0.48	0.13	0.19	100	0.333	28
Hex-Cer d18:2/24:0	Hexosylceramide d18:2/24:0	Hexosylceramides	0.88	1	0.52	2.2	0.78	1.2	0.42	0.41	100	0.01	28
AbsAcid	Abscisic acid	Hormones and Related									0	0.05813	28
Cortisol	Cortisol	Hormones and Related	0.35	0.34	0.097	0.49	0.28	0.39	0.11	0.09	100	0.06498	28
Cortisone	Cortisone	Hormones and Related	0.084	0.086	0.076	0.098	0.08	0.094	0.014	0.008	32	0.0851258	28
DHEAS	Dehydroepiandrosterone sulfate	Hormones and Related	0.76	0.86	0.24	1.8	0.48	1.2	0.68	0.42	100	0.018	28
3-IAA	Indoleacetic acid	Indoles and Derivatives	1.8	2.3	0.69	9.7	1.3	2.6	1.3	1.7	100	0.0625	28
3-IPA	Indolepropionic acid	Indoles and Derivatives	0.73	0.9	0.18	3.7	0.46	1	0.55	0.8	96	0.0110957	28
Indole	Indole	Indoles and Derivatives									0	12.1905	28
Ind-SO4	Indoxyl sulfate	Indoles and Derivatives	7.5	8.4	2.2	16	5.5	11	5.7	3.9	100	78	28
LPC 14:0	Lysophosphatidylcholine 14:0	Lysophosphatidylcholines	7.2	7.4	4.7	14	5.7	8.2	2.5	2.5	39	0.2525	28
LPC 16:0	Lysophosphatidylcholine 16:0	Lysophosphatidylcholines	103	105	69	164	89	119	29	23	100	0.079	28
LPC 16:1	Lysophosphatidylcholine 16:1	Lysophosphatidylcholines	2.4	2.6	1.6	5.4	2	2.8	0.75	0.92	100	0.04279	28
LPC 17:0	Lysophosphatidylcholine 17:0	Lysophosphatidylcholines	2	2.1	1.1	4.3	1.7	2.7	1	0.71	100	0.4095	28
LPC 18:0	Lysophosphatidylcholine 18:0	Lysophosphatidylcholines	35	37	22	63	31	41	10	8.9	100	0.142	28
LPC 18:1	Lysophosphatidylcholine 18:1	Lysophosphatidylcholines	22	23	13	32	19	28	8.6	5.5	100	0.214	28
LPC 18:2	Lysophosphatidylcholine 18:2	Lysophosphatidylcholines	35	37	20	66	27	42	15	12	100	0.156	28
LPC 20:3	Lysophosphatidylcholine 20:3	Lysophosphatidylcholines	1.9	2	1	3.3	1.5	2.3	0.73	0.6	100	0.058535	28
LPC 20:4	Lysophosphatidylcholine 20:4	Lysophosphatidylcholines	8.4	9	3.6	14	6.3	12	5.9	3.1	100	0.0727	28
LPC 24:0	Lysophosphatidylcholine 24:0	Lysophosphatidylcholines	0.16	0.17	0.1	0.26	0.12	0.21	0.083	0.049	100	0.0895	28
LPC 26:0	Lysophosphatidylcholine 26:0	Lysophosphatidylcholines	0.18	0.2	0.1	0.37	0.14	0.24	0.1	0.074	79	0.0619	28
LPC 26:1	Lysophosphatidylcholine 26:1	Lysophosphatidylcholines	0.19	0.23	0.077	0.56	0.14	0.3	0.16	0.12	100	0.166	28
Hypoxanthine	Hypoxanthine	Nucleobases and Related	2.7	3.5	0.6	19	1.5	3.5	2.1	4	79	0.4	28
Xanthine	Xanthine	Nucleobases and Related	0.59	0.62	0.47	0.8	0.56	0.75	0.2	0.11	54	0.03922	28
PC 24:0	Phosphatidylcholine 24:0	Phosphatidylcholines	0.071	0.1	0.036	0.22	0.042	0.18	0.14	0.072	36	0.8725	28
PC 26:0	Phosphatidylcholine 26:0	Phosphatidylcholines									0	0.03336	28
PC 28:1	Phosphatidylcholine 28:1	Phosphatidylcholines	3.7	3.8	1.8	7.9	3.2	4	0.83	1.3	100	0.122	28
PC 30:0	Phosphatidylcholine 30:0	Phosphatidylcholines	3.1	3.6	2.1	6.6	2.8	4.1	1.3	1.1	100	0.02949	28
PC 30:2	Phosphatidylcholine 30:2	Phosphatidylcholines			0.11	0.11					5.9	0.0151042	17
PC 32:0	Phosphatidylcholine 32:0	Phosphatidylcholines	12	13	9.3	21	10	15	4.2	3	100	0.48	28
PC 32:1	Phosphatidylcholine 32:1	Phosphatidylcholines	7.1	8	3.7	27	5.4	8.4	3	4.6	100	0.00633	28
PC 32:2	Phosphatidylcholine 32:2	Phosphatidylcholines	2.7	2.7	0.49	4.3	2	3.4	1.5	0.96	96	0.096345	28
PC 32:3	Phosphatidylcholine 32:3	Phosphatidylcholines	0.64	0.69	0.46	1.5	0.58	0.74	0.15	0.21	100	0.174	28
PC 34:1	Phosphatidylcholine 34:1	Phosphatidylcholines	139	148	91	262	123	174	51	39	100	0.061205	28
PC 34:2	Phosphatidylcholine 34:2	Phosphatidylcholines	328	324	213	439	285	358	73	59	100	0.0141726	28
PC 34:3	Phosphatidylcholine 34:3	Phosphatidylcholines	13	13	7.9	20	11	15	4.6	3	100	0.282	28
PC 34:4	Phosphatidylcholine 34:4	Phosphatidylcholines	1.5	1.6	0.88	3.1	1.2	1.7	0.49	0.53	100	0.04206	28
PC 36:0	Phosphatidylcholine 36:0	Phosphatidylcholines	1.7	1.9	0.91	3.9	1.3	2.6	1.3	0.8	100	0.1185	28
PC 36:1	Phosphatidylcholine 36:1	Phosphatidylcholines	37	39	25	62	31	42	11	10	100	0.05691	28
PC 36:2	Phosphatidylcholine 36:2	Phosphatidylcholines	208	204	128	288	184	229	45	39	100	0.083375	28
PC 36:3	Phosphatidylcholine 36:3	Phosphatidylcholines	104	104	71	148	88	113	25	20	100	0.027775	28
PC 36:4	Phosphatidylcholine 36:4	Phosphatidylcholines	181	187	106	289	144	224	80	50	100	0.00875	28
PC 36:5	Phosphatidylcholine 36:5	Phosphatidylcholines	21	26	9.2	69	13	32	18	16	100	0.97	28
PC 36:6	Phosphatidylcholine 36:6	Phosphatidylcholines	0.7	0.86	0.33	2.2	0.58	1.2	0.59	0.42	100	0.03304	28
PC 38:0	Phosphatidylcholine 38:0	Phosphatidylcholines	3	3.3	1.9	6.3	2.5	3.9	1.4	1.1	100	0.05754	28
PC 38:1	Phosphatidylcholine 38:1	Phosphatidylcholines	0.6	0.61	0.12	1.6	0.33	0.79	0.46	0.37	100	0.0385	17
PC 38:3	Phosphatidylcholine 38:3	Phosphatidylcholines	33	38	27	66	30	46	16	11	100	0.035	28
PC 38:4	Phosphatidylcholine 38:4	Phosphatidylcholines	117	118	57	200	80	147	67	37	100	0.4305	28
PC 38:5	Phosphatidylcholine 38:5	Phosphatidylcholines	52	52	25	114	41	59	18	18	100	0.016525	28
PC 38:6	Phosphatidylcholine 38:6	Phosphatidylcholines	67	73	41	128	58	88	30	22	100	0.19	28
PC 40:1	Phosphatidylcholine 40:1	Phosphatidylcholines	0.63	0.64	0.59	0.73	0.59	0.71	0.11	0.061	14	0.0192925	28
PC 40:2	Phosphatidylcholine 40:2	Phosphatidylcholines	0.25	0.26	0.17	0.47	0.2	0.31	0.11	0.078	100	0.033	28
PC 40:3	Phosphatidylcholine 40:3	Phosphatidylcholines	0.46	0.47	0.29	0.75	0.38	0.52	0.14	0.12	100	0.219	28
PC 40:4	Phosphatidylcholine 40:4	Phosphatidylcholines	2.4	2.6	1.4	4.9	1.9	3	1.1	0.89	100	0.0424	28
PC 40:5	Phosphatidylcholine 40:5	Phosphatidylcholines	6.8	7.4	3.7	17	6.5	8.2	1.7	2.7	100	0.01122	28
PC 40:6	Phosphatidylcholine 40:6	Phosphatidylcholines	25	26	13	56	20	29	9.1	8.5	100	0.119	28
PC 42:0	Phosphatidylcholine 42:0	Phosphatidylcholines	0.46	0.54	0.29	1.1	0.39	0.63	0.24	0.22	100	0.01136	28
PC 42:1	Phosphatidylcholine 42:1	Phosphatidylcholines	0.27	0.3	0.16	0.63	0.23	0.34	0.12	0.12	100	0.011	28
PC 42:2	Phosphatidylcholine 42:2	Phosphatidylcholines	0.2	0.23	0.14	0.43	0.18	0.28	0.1	0.079	100	0.17	28
PC 42:4	Phosphatidylcholine 42:4	Phosphatidylcholines	0.15	0.16	0.11	0.23	0.14	0.19	0.05	0.032	100	0.135	28
PC 42:5	Phosphatidylcholine 42:5	Phosphatidylcholines	0.25	0.26	0.14	0.41	0.22	0.31	0.089	0.062	100	0.033	28
PC 42:6	Phosphatidylcholine 42:6	Phosphatidylcholines	0.41	0.41	0.21	0.66	0.33	0.47	0.15	0.11	100	0.05	28
PC O-28:0	Phosphatidylcholine O-28:0	Phosphatidylcholines	0.3	0.34	0.23	0.49	0.25	0.46	0.21	0.1	50	0.13	28
PC O-28:1	Phosphatidylcholine O-28:1	Phosphatidylcholines	0.41	0.44	0.22	0.79	0.35	0.54	0.19	0.15	100	0.495	28
PC O-30:0	Phosphatidylcholine O-30:0	Phosphatidylcholines	0.26	0.3	0.16	0.61	0.23	0.39	0.16	0.11	100	0.00852	28
PC O-30:1	Phosphatidylcholine O-30:1	Phosphatidylcholines	0.21	0.32	0.085	0.83	0.12	0.55	0.43	0.27	46	0.026175	28
PC O-30:2	Phosphatidylcholine O-30:2	Phosphatidylcholines	0.12	0.13	0.069	0.28	0.11	0.15	0.044	0.045	100	0.015695	28
PC O-32:1	Phosphatidylcholine O-32:1	Phosphatidylcholines	2.5	2.6	1.5	4.5	2	2.9	0.93	0.79	100	0.01855	28
PC O-32:2	Phosphatidylcholine O-32:2	Phosphatidylcholines	0.82	0.87	0.51	1.5	0.69	0.98	0.29	0.27	100	0.017	28
PC O-34:0	Phosphatidylcholine O-34:0	Phosphatidylcholines	1.1	1.3	0.71	2.4	0.97	1.4	0.47	0.4	100	0.027135	28
PC O-34:1	Phosphatidylcholine O-34:1	Phosphatidylcholines	8.2	8.1	4.7	13	6.9	8.8	1.9	2	100	0.335	28
PC O-34:2	Phosphatidylcholine O-34:2	Phosphatidylcholines	11	11	6.4	21	8.9	13	3.8	3.2	100	2.82	28
PC O-34:3	Phosphatidylcholine O-34:3	Phosphatidylcholines	9.1	9.2	4.2	16	6.5	11	4.1	3.2	100	0.040903	28
PC O-36:0	Phosphatidylcholine O-36:0	Phosphatidylcholines	0.63	0.7	0.4	1.3	0.53	0.83	0.3	0.23	100	0.01898	28
PC O-36:1	Phosphatidylcholine O-36:1	Phosphatidylcholines	6.3	6.7	3.9	13	5.4	7.4	2	1.9	100	0.030305	28
PC O-36:2	Phosphatidylcholine O-36:2	Phosphatidylcholines	11	12	7.2	24	10	13	3.1	3.5	100	0.01406	28
PC O-36:3	Phosphatidylcholine O-36:3	Phosphatidylcholines	6.4	6.8	3.3	15	5.5	7.7	2.2	2.2	100	0.685	28
PC O-36:4	Phosphatidylcholine O-36:4	Phosphatidylcholines	15	16	10	41	14	17	3.2	5.8	100	0.0099198	28
PC O-36:5	Phosphatidylcholine O-36:5	Phosphatidylcholines	12	13	6.5	24	10	15	4.3	3.8	100	0.00937	28
PC O-38:0	Phosphatidylcholine O-38:0	Phosphatidylcholines	1.9	2	1	3.3	1.4	2.4	0.98	0.65	100	0.013125	28
PC O-38:1	Phosphatidylcholine O-38:1	Phosphatidylcholines	0.26	0.27	0.029	0.58	0.17	0.36	0.19	0.13	71	0.02148	28
PC O-38:2	Phosphatidylcholine O-38:2	Phosphatidylcholines	1.5	1.5	0.72	2.9	1.2	1.8	0.59	0.55	100	0.028935	28
PC O-38:3	Phosphatidylcholine O-38:3	Phosphatidylcholines	3	3.1	1.7	6	2.5	3.5	0.98	0.86	100	0.010565	28
PC O-38:4	Phosphatidylcholine O-38:4	Phosphatidylcholines	11	12	5.9	25	9.5	14	4.6	3.9	100	0.0110284	28
PC O-38:5	Phosphatidylcholine O-38:5	Phosphatidylcholines	17	17	11	37	14	18	3.6	4.7	100	0.017	28
PC O-38:6	Phosphatidylcholine O-38:6	Phosphatidylcholines	7.4	7.9	5.4	15	6.1	9.3	3.2	2.3	100	0.020575	28
PC O-40:1	Phosphatidylcholine O-40:1	Phosphatidylcholines	1.3	1.3	0.78	2.1	1.2	1.5	0.31	0.3	100	0.063	28
PC O-40:2	Phosphatidylcholine O-40:2	Phosphatidylcholines	1.6	1.7	0.91	3.3	1.4	1.9	0.55	0.48	100	0.014	28
PC O-40:3	Phosphatidylcholine O-40:3	Phosphatidylcholines	0.84	0.89	0.55	1.6	0.74	1	0.28	0.23	100	0.0194	28
PC O-40:4	Phosphatidylcholine O-40:4	Phosphatidylcholines	2	2	1.1	4.1	1.8	2.1	0.31	0.53	100	0.696	28
PC O-40:5	Phosphatidylcholine O-40:5	Phosphatidylcholines	2.9	3	1.9	5.7	2.5	3.3	0.86	0.8	100	0.08374	28
PC O-40:6	Phosphatidylcholine O-40:6	Phosphatidylcholines	4	4.3	2.8	8.3	3.4	4.8	1.4	1.2	100	0.02857	28
PC O-42:0	Phosphatidylcholine O-42:0	Phosphatidylcholines	0.52	0.53	0.42	0.77	0.46	0.57	0.12	0.1	36	0.01807	28
PC O-42:1	Phosphatidylcholine O-42:1	Phosphatidylcholines	0.37	0.38	0.23	0.6	0.32	0.43	0.11	0.087	100	0.167	28
[truncated: 277 more rows]

## Sheet: Black-female-90s
Quantitative metabolomics database (QMDB)
[truncated: 640 more rows]

[truncated: 24 more sheets: Black-male-20s, Black-male-30s, Black-male-40s, Black-male-50s, Black-male-60s, Black-male-70s, Black-male-80s, Black-male-90s, White-female-20s, White-female-30s, White-female-40s, White-female-50s, White-female-60s, White-female-70s, White-female-80s, White-female-90s, White-male-20s, White-male-30s, White-male-40s, White-male-50s …]
