# Supplementary material for: Human Metabolome Reference Database in a Biracial Cohort across the Adult Lifespan
Source: Metabolites. 2023 Apr 25;13(5):591. doi: 10.3390/metabo13050591 (PMC10221446; doi:10.3390/metabo13050591)
Supplement: Supplementary file 1 [file metabolites-13-00591-s001.zip › Supplementary Table S2. Correlation with age for all metabolites.xlsx]

## Sheet: Black women
Metabolite	Pearson correlation coefficient (R) (log2 concentration with age)	p-value (log2 concentration with age)	q-value (log2 concentration with age)	Pearson correlation coefficient (R2) (log2 concentration with age^2)	p-value (log2 concentration with age^2)	q-value (log2 concentration with age^2)	Significant association
Alanine	0.0949352	0.247845	1	0.0757221	0.357068	1	no
Arginine	-0.0397564	0.629073	1	-0.0454738	0.580561	1	no
Asparagine	-0.0514278	0.531968	1	-0.0551694	0.502512	1	no
Aspartic Acid	0.418554	9.81534e-08	4.87823e-05	0.377347	1.93541e-06	0.000961898	linear
Cysteine	0.460227	3.11649e-09	1.54889e-06	0.432209	3.33421e-08	1.6571e-05	linear
Glutamine	0.161132	0.0488573	1	0.156773	0.0553812	1	no
Glutamic Acid	0.0835571	0.309354	1	0.0569288	0.488962	1	no
Glycine	0.215763	0.00800771	1	0.220088	0.00680501	1	no
Histidine	-0.117054	0.153717	1	-0.132395	0.106299	1	no
Isoleucine	-0.0655814	0.425251	1	-0.0968012	0.238629	1	no
Leucine	0.0397232	0.62936	1	0.00609947	0.940948	1	no
Lysine	0.244192	0.00260012	1	0.202491	0.0129531	1	no
Methionine	0.0547131	0.506058	1	0.0513285	0.532762	1	no
Phenylalanine	0.26676	0.000967523	0.480859	0.243438	0.00268344	1	no
Proline	0.094575	0.249652	1	0.0934672	0.255266	1	no
Serine	0.035438	0.666811	1	0.0192713	0.814929	1	no
Threonine	-0.12954	0.114124	1	-0.134182	0.101621	1	no
Tryptophan	-0.0722455	0.379635	1	-0.105752	0.197755	1	no
Tyrosine	0.0702182	0.393186	1	0.0531356	0.518417	1	no
Valine	0.0948072	0.248486	1	0.0608528	0.459456	1	no
Cholic acid	-0.155126	0.0580267	1	-0.152229	0.0629321	1	no
Chenodeoxycholic acid	0.0332306	0.686436	1	0.0375617	0.64814	1	no
Deoxycholic acid	0.0168858	0.8375	1	-0.0071106	0.931181	1	no
Glycocholic acid	-0.000847468	0.991788	1	0.00615928	0.94037	1	no
Glycochenodeoxycholic acid	0.0376321	0.647525	1	0.0493217	0.548922	1	no
Glycodeoxycholic acid	0.0105704	0.897847	1	0.00748835	0.927535	1	no
Glycolithocholic acid	0.147262	0.0721281	1	0.142941	0.0809867	1	no
Glycolithocholic acid sulfate	-0.0130517	0.874048	1	-0.0162976	0.843086	1	no
Glycoursodeoxycholic acid	0.054381	0.508646	1	0.0597724	0.46748	1	no
Taurocholic acid	0.172793	0.0344722	1	0.165149	0.0434226	1	no
Taurochenodeoxycholic acid	0.0838997	0.307367	1	0.0893901	0.276674	1	no
Taurodeoxycholic acid	0.0572195	0.486741	1	0.049765	0.545331	1	no
Tauro-muricholic acids	-0.162316	0.0471996	1	-0.158234	0.0531193	1	no
gamma-Amino butyric acid	0.331319	3.45108e-05	0.0171519	0.325086	4.92885e-05	0.0244964	linear
Putrescine	0.187964	0.0212571	1	0.189528	0.0201836	1	no
Serotonin	0.0119987	0.884135	1	0.0204358	0.803965	1	no
beta-Alanine	0.219152	0.00705084	1	0.210254	0.00980954	1	no
Arachidonic acid (AA, omega-6-FA(20:4))	-0.0602555	0.463883	1	-0.0396298	0.630166	1	no
Docosahexaenoic acid (DHA, omega-3-FA(22:6))	0.142892	0.0810911	1	0.142401	0.0821521	1	no
Eicosapentaenoic acid	0.161458	0.0483951	1	0.153646	0.060491	1	no
Octadecenoic acid	0.150848	0.0653856	1	0.147804	0.0710742	1	no
Octadecadienoic acid	0.0498986	0.544252	1	0.0621138	0.450188	1	no
Eicosenoic acid	0.0592453	0.471423	1	0.0583152	0.478423	1	no
Eicosadienoic acid	0.111927	0.17268	1	0.123962	0.1307	1	no
Eicosatrienoic acid	0.101911	0.214628	1	0.10783	0.189037	1	no
Aconitic acid	0.502969	5.4081e-11	2.68783e-08	0.471425	1.13653e-09	5.64857e-07	linear
Hippuric acid	0.190609	0.0194702	1	0.196066	0.0161898	1	no
Lactic acid	0.147917	0.0708564	1	0.145879	0.0748728	1	no
Indoleacetic acid	0.203567	0.0124705	1	0.165719	0.0426939	1	no
Indolepropionic acid	-0.0804212	0.327925	1	-0.0697646	0.396257	1	no
Indoxyl sulfate	0.358173	6.78783e-06	0.00337355	0.329279	3.88136e-05	0.0192904	linear
1-Methylhistidine	0.474773	8.34627e-10	4.1481e-07	0.45527	4.81497e-09	2.39304e-06	linear
3-Methylhistidine	0.150771	0.0655264	1	0.139109	0.0895557	1	no
5-Aminovaleric acid	0.244541	0.00256238	1	0.262527	0.00117239	0.582676	no
alpha-Aminobutyric acid	0.119485	0.14529	1	0.0924311	0.260595	1	no
Asymmetric dimethylarginine	0.365223	4.31942e-06	0.00214675	0.359134	6.38639e-06	0.00317404	linear
Betaine	0.2592	0.00136047	0.676153	0.258753	0.00138777	0.689719	no
Citrulline	0.456566	4.30026e-09	2.13723e-06	0.44094	1.62978e-08	8.10003e-06	linear
Creatinine	0.254353	0.00168408	0.83699	0.222982	0.00609306	1	no
Cystine	0.38703	9.95551e-07	0.000494789	0.373071	2.57836e-06	0.00128144	linear
Homoarginine	-0.278797	0.000550801	0.273748	-0.298187	0.000210432	0.104585	no
Homocysteine	0.448984	8.27729e-09	4.11382e-06	0.437757	2.12071e-08	1.05399e-05	linear
Kynurenine	0.419107	9.40409e-08	4.67383e-05	0.392403	6.82059e-07	0.000338984	linear
Methionine-Sulfoxide	0.165206	0.0433488	1	0.150427	0.0661497	1	no
Ornithine	0.374077	2.41102e-06	0.00119828	0.360537	5.84025e-06	0.00290261	linear
Proline betaine	0.161633	0.0481501	1	0.166553	0.0416465	1	no
Symmetric dimethylarginine	0.444699	1.19014e-08	5.915e-06	0.438812	1.94417e-08	9.66251e-06	linear
Sarcosine	0.192629	0.0181941	1	0.185411	0.0231138	1	no
Taurine	0.30659	0.000135718	0.0674518	0.309539	0.00011599	0.0576469	no
Tryptophan betaine	-0.138437	0.0911306	1	-0.132889	0.104989	1	no
alpha-Aminoadipic acid	0.147431	0.071798	1	0.0885199	0.281396	1	no
trans-4-Hydroxyproline	0.200333	0.0139708	1	0.182952	0.0250326	1	no
Trigonelline	0.353813	8.92982e-06	0.00443812	0.354898	8.34404e-06	0.00414699	non-linear
p-Cresol sulfate	0.225982	0.00542568	1	0.226753	0.00526501	1	no
Cortisol	0.161262	0.0486725	1	0.147006	0.0726285	1	no
Cortisone	-0.107438	0.190661	1	-0.116528	0.155587	1	no
Dehydroepiandrosterone sulfate	-0.362164	5.26223e-06	0.00261533	-0.346037	1.4419e-05	0.00716624	linear
Hypoxanthine	0.0036228	0.964905	1	-0.00920633	0.910972	1	no
Choline	0.453557	5.58696e-09	2.77672e-06	0.440605	1.67578e-08	8.32863e-06	linear
Trimethylamine N-oxide	0.398813	4.30609e-07	0.000214013	0.366404	4.00013e-06	0.00198806	linear
Carnitine	0.199975	0.0141463	1	0.171109	0.0362976	1	no
Acetylcarnitine	0.323144	5.49901e-05	0.0273301	0.316512	7.94782e-05	0.0395007	linear
Propionylcarnitine	0.254877	0.00164599	0.818055	0.219074	0.00707171	1	no
Butyrylcarnitine	0.38061	1.55062e-06	0.000770657	0.353648	9.02208e-06	0.00448398	linear
Valerylcarnitine	0.271899	0.000763086	0.379254	0.249891	0.00204232	1	no
Decanoylcarnitine	0.303677	0.000158239	0.078645	0.283631	0.000436106	0.216745	no
Tetradecenoylcarnitine	0.265378	0.00103049	0.512153	0.275086	0.000657084	0.326571	no
Octadecenoylcarnitine	0.253028	0.001784	0.886647	0.262282	0.00118542	0.589155	no
Octadecadienoylcarnitine	0.316958	7.75528e-05	0.0385437	0.324777	5.01576e-05	0.0249283	non-linear
Lysophosphatidylcholine 16:0	0.122615	0.134966	1	0.104952	0.201188	1	no
Lysophosphatidylcholine 16:1	0.0514506	0.531786	1	0.0494273	0.548066	1	no
Lysophosphatidylcholine 17:0	0.274409	0.000678394	0.337162	0.265981	0.00100259	0.498286	no
Lysophosphatidylcholine 18:0	0.190603	0.0194737	1	0.172611	0.034666	1	no
Lysophosphatidylcholine 18:1	0.112132	0.171891	1	0.112382	0.170932	1	no
Lysophosphatidylcholine 18:2	-0.0530849	0.518816	1	-0.0553137	0.501393	1	no
Lysophosphatidylcholine 20:3	0.0075582	0.92686	1	0.00533178	0.948369	1	no
Lysophosphatidylcholine 20:4	0.200869	0.0137115	1	0.186497	0.0223075	1	no
Lysophosphatidylcholine 24:0	0.0139874	0.8651	1	0.00779392	0.924586	1	no
Lysophosphatidylcholine 26:0	-0.0712423	0.386305	1	-0.078101	0.342119	1	no
Lysophosphatidylcholine 26:1	0.16153	0.0482944	1	0.16034	0.0499923	1	no
Phosphatidylcholine 24:0	-0.0535134	0.515443	1	-0.100336	0.221833	1	no
Phosphatidylcholine 28:1	0.0268344	0.744453	1	0.0883678	0.282227	1	no
Phosphatidylcholine 30:0	-0.142881	0.0811163	1	-0.0431752	0.599857	1	no
Phosphatidylcholine 32:0	0.0367025	0.655668	1	0.0170657	0.835793	1	no
Phosphatidylcholine 32:1	-0.124714	0.128363	1	-0.132189	0.106848	1	no
Phosphatidylcholine 32:2	-0.232884	0.00413181	1	0.0425068	0.605521	1	no
Phosphatidylcholine 32:3	0.0017427	0.983114	1	-0.114583	0.162649	1	no
Phosphatidylcholine 34:1	-0.0505081	0.539339	1	-0.227169	0.0051801	1	no
Phosphatidylcholine 34:2	-0.209325	0.0101464	1	-0.0150395	0.855061	1	no
Phosphatidylcholine 34:3	-0.1997	0.0142824	1	-0.0551675	0.502526	1	no
Phosphatidylcholine 34:4	-0.154105	0.0597181	1	-0.215291	0.0081495	1	no
Phosphatidylcholine 36:0	0.122213	0.136259	1	-0.196957	0.0157025	1	no
Phosphatidylcholine 36:1	-0.0663959	0.419511	1	-0.162163	0.0474105	1	no
Phosphatidylcholine 36:2	-0.146517	0.0735965	1	0.111201	0.175499	1	no
Phosphatidylcholine 36:3	-0.17268	0.0345925	1	-0.0809213	0.324917	1	no
Phosphatidylcholine 36:4	0.0279981	0.733778	1	-0.161369	0.0485213	1	no
Phosphatidylcholine 36:5	0.102657	0.211273	1	-0.183754	0.0243922	1	no
Phosphatidylcholine 36:6	-0.0492115	0.549816	1	0.00579064	0.943933	1	no
Phosphatidylcholine 38:0	0.174756	0.0324439	1	0.081294	0.322686	1	no
Phosphatidylcholine 38:1	0.0648248	0.430623	1	-0.0684751	0.405066	1	no
Phosphatidylcholine 38:3	0.021156	0.797203	1	0.146339	0.0739504	1	no
Phosphatidylcholine 38:4	0.166901	0.0412153	1	0.0452342	0.582559	1	no
Phosphatidylcholine 38:5	0.126547	0.122801	1	0.00436605	0.957711	1	no
Phosphatidylcholine 38:6	0.0863215	0.293564	1	0.140319	0.0867751	1	no
Phosphatidylcholine 40:2	-0.0885395	0.281288	1	0.101855	0.21488	1	no
Phosphatidylcholine 40:3	0.0552646	0.501773	1	0.0626652	0.446169	1	no
Phosphatidylcholine 40:4	-0.0622835	0.448949	1	-0.0823564	0.316382	1	no
Phosphatidylcholine 40:5	0.0349841	0.670828	1	0.0558583	0.497183	1	no
Phosphatidylcholine 40:6	0.164374	0.0444296	1	-0.0731624	0.3736	1	no
Phosphatidylcholine 42:0	0.00850144	0.917763	1	0.0206809	0.801662	1	no
Phosphatidylcholine 42:1	-0.0048203	0.953316	1	0.143439	0.0799231	1	no
Phosphatidylcholine 42:2	-0.0483173	0.557098	1	0.00508133	0.950791	1	no
Phosphatidylcholine 42:4	-0.116592	0.155356	1	-0.00858604	0.916948	1	no
Phosphatidylcholine 42:5	-0.0737079	0.370038	1	-0.0674128	0.412409	1	no
Phosphatidylcholine 42:6	-0.0604338	0.462559	1	-0.0935857	0.254662	1	no
Phosphatidylcholine O-28:0	-0.11333	0.167327	1	-0.0627902	0.44526	1	no
Phosphatidylcholine O-28:1	0.0912309	0.266863	1	-0.0503124	0.540914	1	no
Phosphatidylcholine O-30:0	-0.155301	0.0577402	1	-0.141055	0.0851181	1	no
Phosphatidylcholine O-30:1	-0.0302906	0.7129	1	-0.015698	0.848789	1	no
Phosphatidylcholine O-30:2	0.199479	0.0143921	1	0.182171	0.0256703	1	no
Phosphatidylcholine O-32:1	-0.0818865	0.31916	1	-0.0739397	0.36853	1	no
Phosphatidylcholine O-32:2	0.0715914	0.383976	1	0.062908	0.444405	1	no
Phosphatidylcholine O-34:0	0.0524236	0.524045	1	0.0581962	0.479323	1	no
Phosphatidylcholine O-34:1	0.0128501	0.875977	1	0.0189284	0.818165	1	no
Phosphatidylcholine O-34:2	-0.111865	0.172921	1	-0.119408	0.145551	1	no
Phosphatidylcholine O-34:3	-0.195586	0.0164575	1	-0.192191	0.0184648	1	no
Phosphatidylcholine O-36:0	-0.0045904	0.95554	1	-0.0159684	0.846216	1	no
Phosphatidylcholine O-36:1	0.0312402	0.704313	1	0.0372836	0.650573	1	no
Phosphatidylcholine O-36:2	0.00831789	0.919533	1	0.00215597	0.97911	1	no
Phosphatidylcholine O-36:3	-0.141123	0.0849659	1	-0.154741	0.0586607	1	no
Phosphatidylcholine O-36:4	-0.0536766	0.514161	1	-0.0817344	0.320063	1	no
Phosphatidylcholine O-36:5	0.0393907	0.632234	1	0.013671	0.868124	1	no
Phosphatidylcholine O-38:0	0.00433071	0.958053	1	-0.0268006	0.744764	1	no
Phosphatidylcholine O-38:1	0.0246071	0.765018	1	0.0189131	0.818309	1	no
Phosphatidylcholine O-38:2	-0.104866	0.20156	1	-0.0873954	0.287577	1	no
Phosphatidylcholine O-38:3	-0.0419511	0.610247	1	-0.0352418	0.668546	1	no
Phosphatidylcholine O-38:4	0.0785993	0.339038	1	0.0624952	0.447406	1	no
Phosphatidylcholine O-38:5	0.107523	0.190307	1	0.0769493	0.349306	1	no
Phosphatidylcholine O-38:6	0.0919699	0.262992	1	0.0559828	0.496223	1	no
Phosphatidylcholine O-40:1	-0.0590643	0.47278	1	-0.0690923	0.400835	1	no
Phosphatidylcholine O-40:2	0.142802	0.0812861	1	0.147686	0.0713016	1	no
Phosphatidylcholine O-40:3	-0.0372547	0.650826	1	-0.0311126	0.705465	1	no
Phosphatidylcholine O-40:4	-0.0661062	0.421547	1	-0.0720384	0.381006	1	no
Phosphatidylcholine O-40:5	0.0234283	0.775969	1	0.0119643	0.884465	1	no
Phosphatidylcholine O-40:6	0.151678	0.0639013	1	0.130998	0.110073	1	no
Phosphatidylcholine O-42:1	0.0426198	0.604561	1	0.0467187	0.570233	1	no
Phosphatidylcholine O-42:2	-0.0185776	0.821478	1	-0.0188967	0.818464	1	no
Phosphatidylcholine O-42:3	-0.121018	0.14016	1	-0.109222	0.183358	1	no
Phosphatidylcholine O-42:4	-0.18584	0.0227921	1	-0.184429	0.023864	1	no
Phosphatidylcholine O-42:5	-0.0683685	0.4058	1	-0.0737773	0.369586	1	no
Phosphatidylcholine O-44:3	0.0131916	0.872708	1	0.0289041	0.725503	1	no
Phosphatidylcholine O-44:4	-0.116693	0.154997	1	-0.099721	0.224694	1	no
Phosphatidylcholine O-44:5	-0.0502936	0.541066	1	-0.0512637	0.53328	1	no
Phosphatidylcholine O-44:6	-0.102276	0.212982	1	-0.101515	0.216422	1	no
Sphingomyelin 33:1	0.13942	0.088834	1	0.129751	0.113529	1	no
Sphingomyelin 35:1	0.227177	0.00517854	1	0.209329	0.0101449	1	no
Sphingomyelin 41:1	-0.0011523	0.988834	1	-0.0362943	0.659257	1	no
Sphingomyelin 41:2	0.197215	0.0155642	1	0.164436	0.0443478	1	no
Sphingomyelin 43:1	0.0655282	0.425627	1	0.0315452	0.701562	1	no
Sphingomyelin 34:1	0.1966	0.0158962	1	0.181616	0.0261316	1	no
Sphingomyelin 34:2	0.309823	0.000114237	0.0567758	0.274919	0.000662285	0.329156	no
Sphingomyelin 36:1	0.1617	0.0480558	1	0.127875	0.118889	1	no
Sphingomyelin 36:2	0.303898	0.000156421	0.0777411	0.260905	0.0012609	0.626666	no
Sphingomyelin 38:3	0.113675	0.166031	1	0.0911909	0.267074	1	no
Sphingomyelin 42:1	-0.0852327	0.299718	1	-0.115339	0.159877	1	no
Sphingomyelin 42:2	0.184587	0.0237426	1	0.155281	0.0577738	1	no
Sphingomyelin 44:1	0.0738665	0.369006	1	0.0465731	0.571437	1	no
Sphingomyelin 44:2	0.212977	0.00887854	1	0.204414	0.0121017	1	no
Hexose	0.118656	0.148124	1	0.0887855	0.279949	1	no
Cholesteryl ester 14:0	-0.0997703	0.224464	1	-0.112687	0.169764	1	no
Cholesteryl ester 15:0	0.0477376	0.561845	1	0.0217647	0.7915	1	no
Cholesteryl ester 16:0	0.0522017	0.525805	1	0.027087	0.742132	1	no
Cholesteryl ester 16:1	-0.0538959	0.512441	1	-0.0545955	0.506974	1	no
Cholesteryl ester 17:0	0.124599	0.128716	1	0.0970183	0.237573	1	no
Cholesteryl ester 17:1	0.051773	0.529215	1	0.0574637	0.484881	1	no
Cholesteryl ester 18:0	-0.0189706	0.817767	1	-0.0477582	0.561676	1	no
Cholesteryl ester 18:1	-0.0383338	0.641405	1	-0.052441	0.523907	1	no
Cholesteryl ester 18:2	-0.0503364	0.540721	1	-0.0682648	0.406514	1	no
Cholesteryl ester 18:3	-0.100496	0.221096	1	-0.0991499	0.227374	1	no
Cholesteryl ester 20:3	-0.0194652	0.813101	1	-0.0383194	0.64153	1	no
Cholesteryl ester 20:4	0.16667	0.0415018	1	0.137961	0.0922587	1	no
Cholesteryl ester 20:5	0.168438	0.039358	1	0.15102	0.0650773	1	no
Cholesteryl ester 22:5	0.0769585	0.349248	1	0.0512847	0.533112	1	no
Cholesteryl ester 22:6	0.191333	0.0190039	1	0.155502	0.0574142	1	no
Ceramide d16:1/18:0	0.132392	0.106307	1	0.15632	0.0560988	1	no
Ceramide d16:1/20:0	0.273409	0.000711029	0.353382	0.250203	0.00201524	1	no
Ceramide d16:1/22:0	0.153075	0.061466	1	0.124126	0.130185	1	no
Ceramide d16:1/23:0	0.185387	0.0231322	1	0.159047	0.0518933	1	no
Ceramide d16:1/24:0	0.0414946	0.614143	1	0.00361436	0.964987	1	no
Ceramide d18:1/14:0	-0.136021	0.0969762	1	-0.106374	0.195117	1	no
Ceramide d18:1/16:0	0.0855704	0.2978	1	0.0739053	0.368754	1	no
Ceramide d18:1/18:0	0.287758	0.000356098	0.176981	0.260583	0.00127919	0.635755	no
Ceramide d18:1/20:0-OH	0.0093926	0.909178	1	0.0228227	0.781613	1	no
Ceramide d18:1/20:0	0.32567	4.76857e-05	0.0236998	0.292582	0.000279884	0.139103	linear
Ceramide d18:1/22:0	0.127833	0.119013	1	0.0905023	0.270718	1	no
Ceramide d18:1/23:0	0.221325	0.00649213	1	0.184091	0.0241277	1	no
Ceramide d18:1/24:0	0.0726046	0.377264	1	0.0303022	0.712795	1	no
Ceramide d18:1/24:1	0.400999	3.67262e-07	0.000182529	0.378669	1.76975e-06	0.000879566	linear
Ceramide d18:1/25:0	0.329342	3.86744e-05	0.0192212	0.295756	0.000238307	0.118439	linear
Ceramide d18:1/26:0	0.228257	0.00496386	1	0.194027	0.0173544	1	no
Ceramide d18:1/26:1	0.280045	0.0005188	0.257844	0.276178	0.000623987	0.310121	no
Ceramide d18:2/16:0	0.273662	0.000702633	0.349209	0.246912	0.00231867	1	no
Ceramide d18:2/18:0	0.303727	0.000157827	0.07844	0.267547	0.000933277	0.463838	no
Ceramide d18:2/20:0	0.388246	9.14441e-07	0.000454477	0.361538	5.47779e-06	0.00272246	linear
Ceramide d18:2/22:0	0.217236	0.00757848	1	0.173221	0.0340211	1	no
Ceramide d18:2/23:0	0.304176	0.000154152	0.0766135	0.277634	0.000582279	0.289393	no
Ceramide d18:2/24:0	0.156223	0.0562528	1	0.114063	0.164579	1	no
Ceramide d18:2/24:1	0.448709	8.47426e-09	4.21171e-06	0.410203	1.85611e-07	9.22487e-05	linear
Dihydroceramide d18:0/22:0	-0.0698309	0.395807	1	-0.0486895	0.554062	1	no
Dihydroceramide d18:0/24:0	-0.0505652	0.53888	1	-0.088305	0.28257	1	no
Dihydroceramide d18:0/24:1	0.20616	0.0113719	1	0.16533	0.0431903	1	no
Diacylglyceride 16:0_18:1	0.0821204	0.317775	1	0.076743	0.350603	1	no
Diacylglyceride 16:0_18:2	0.0678733	0.409217	1	0.0564855	0.492358	1	no
Diacylglyceride 16:1_18:2	0.13213	0.107008	1	0.123986	0.130623	1	no
Diacylglyceride 17:0_18:1	0.0966095	0.239565	1	0.0955033	0.245014	1	no
Diacylglyceride 18:1_18:1	0.0996779	0.224896	1	0.0897026	0.274992	1	no
Diacylglyceride 18:1_18:2	0.124854	0.127932	1	0.114647	0.162413	1	no
Diacylglyceride 18:2_18:2	0.0593927	0.470318	1	0.0499215	0.544067	1	no
Diacylglyceride 18:2_18:3	0.068149	0.407312	1	0.0524946	0.523482	1	no
Dihexosylceramide d18:1/14:0	-0.0536854	0.514092	1	-0.0371793	0.651486	1	no
Dihexosylceramide d18:1/16:0	-0.0480595	0.559207	1	-0.0498418	0.544711	1	no
Dihexosylceramide d18:1/18:0	0.275622	0.000640654	0.318405	0.264784	0.0010587	0.526173	no
Dihexosylceramide d18:1/20:0	0.303668	0.000158313	0.0786814	0.283808	0.000432371	0.214888	no
Dihexosylceramide d18:1/22:0	0.158478	0.0527492	1	0.143258	0.0803091	1	no
Dihexosylceramide d18:1/24:0	0.0879548	0.284491	1	0.0781327	0.341922	1	no
Dihexosylceramide d18:1/24:1	0.113053	0.168374	1	0.109483	0.182309	1	no
Trihexosylceramide d18:1/16:0	0.248912	0.00212968	1	0.242661	0.0027719	1	no
Trihexosylceramide d18:1/18:0	0.293745	0.000263931	0.131174	0.286811	0.000373158	0.18546	no
Trihexosylceramide d18:1/24:1	0.298492	0.000207153	0.102955	0.292534	0.00028056	0.139438	no
Trihexosylceramide d18:1/26:1	0.0848087	0.302137	1	0.0793858	0.334212	1	no
Trihexosylceramide d18:1/20:0	-0.159362	0.0514248	1	-0.098501	0.230445	1	no
Trihexosylceramide d18:1/22:0	0.11692	0.15419	1	0.13661	0.095523	1	no
Hexosylceramide d16:1/22:0	0.00584953	0.943363	1	-0.00341065	0.966959	1	no
Hexosylceramide d16:1/24:0	-0.0312679	0.704063	1	-0.0315035	0.701939	1	no
Hexosylceramide d18:1/16:0	0.0974836	0.23532	1	0.0872218	0.288539	1	no
Hexosylceramide d18:1/18:0	0.0608101	0.459771	1	0.0386263	0.638861	1	no
Hexosylceramide d18:1/18:1	0.222031	0.00631932	1	0.202018	0.0131705	1	no
Hexosylceramide d18:1/20:0	0.157071	0.0549139	1	0.148141	0.0704244	1	no
Hexosylceramide d18:1/22:0	-0.0393993	0.632159	1	-0.0476378	0.562664	1	no
Hexosylceramide d18:1/23:0	0.0262535	0.749799	1	0.0291813	0.722978	1	no
Hexosylceramide d18:1/24:0	-0.052012	0.527312	1	-0.0598581	0.466841	1	no
Hexosylceramide d18:1/24:1	0.187596	0.0215165	1	0.190023	0.0198545	1	no
Hexosylceramide d18:1/26:0	0.0985216	0.230348	1	0.109817	0.180968	1	no
Hexosylceramide d18:2/18:0	0.185804	0.0228193	1	0.158544	0.0526492	1	no
Hexosylceramide d18:2/22:0	0.222129	0.0062957	1	0.198319	0.0149825	1	no
Hexosylceramide d18:2/23:0	0.250844	0.00196047	0.974353	0.246364	0.00237307	1	no
Hexosylceramide d18:2/24:0	0.234855	0.00381725	1	0.199268	0.0144982	1	no
Triacylglyceride 14:0_32:2	-0.0419764	0.610032	1	-0.0447994	0.586192	1	no
Triacylglyceride 14:0_34:0	-0.00692469	0.932976	1	-0.0114445	0.889451	1	no
Triacylglyceride 14:0_34:1	-0.0533505	0.516724	1	-0.0627579	0.445495	1	no
Triacylglyceride 14:0_34:2	-0.0509668	0.535657	1	-0.0596909	0.468088	1	no
Triacylglyceride 14:0_34:3	-0.0603811	0.46295	1	-0.0648322	0.43057	1	no
Triacylglyceride 14:0_35:1	0.0429412	0.601836	1	0.0313318	0.703487	1	no
Triacylglyceride 14:0_35:2	0.0603712	0.463023	1	0.0611152	0.457519	1	no
Triacylglyceride 14:0_36:1	-0.0521319	0.52636	1	-0.0633205	0.441418	1	no
Triacylglyceride 14:0_36:2	0.0133481	0.871212	1	0.002388	0.976863	1	no
Triacylglyceride 14:0_36:3	-0.00229115	0.977801	1	-0.0149418	0.855992	1	no
Triacylglyceride 14:0_36:4	-0.0395216	0.631102	1	-0.051767	0.529262	1	no
Triacylglyceride 14:0_38:4	0.0014262	0.98618	1	-0.0067392	0.934767	1	no
Triacylglyceride 14:0_38:5	0.0096587	0.906616	1	-0.000258043	0.997499	1	no
Triacylglyceride 16:0_28:1	-0.0745827	0.364369	1	-0.0714995	0.384588	1	no
Triacylglyceride 16:0_28:2	-0.0997466	0.224575	1	-0.0967784	0.23874	1	no
Triacylglyceride 16:0_30:2	-0.112232	0.171506	1	-0.116469	0.155795	1	no
Triacylglyceride 16:0_32:0	-0.0134923	0.869833	1	-0.0333345	0.685507	1	no
Triacylglyceride 16:0_32:1	-0.0589365	0.473741	1	-0.0694246	0.398568	1	no
Triacylglyceride 16:0_32:2	-0.05523	0.502042	1	-0.0646603	0.431796	1	no
Triacylglyceride 16:0_32:3	-0.0564698	0.492478	1	-0.0621343	0.450039	1	no
Triacylglyceride 16:0_33:1	0.0282459	0.731512	1	0.0170528	0.835915	1	no
Triacylglyceride 16:0_33:2	0.0484397	0.556099	1	0.0407598	0.620435	1	no
Triacylglyceride 16:0_34:0	0.0179881	0.827053	1	-0.0082294	0.920386	1	no
Triacylglyceride 16:0_34:1	0.00137528	0.986674	1	-0.0165073	0.841094	1	no
Triacylglyceride 16:0_34:2	0.00817371	0.920923	1	-0.00932635	0.909816	1	no
Triacylglyceride 16:0_34:3	0.0280192	0.733585	1	0.0147529	0.857794	1	no
Triacylglyceride 16:0_34:4	0.00688243	0.933384	1	-0.00798587	0.922734	1	no
Triacylglyceride 16:0_35:1	0.0786231	0.338891	1	0.0631678	0.442523	1	no
Triacylglyceride 16:0_35:2	0.0999977	0.223404	1	0.084686	0.302839	1	no
Triacylglyceride 16:0_35:3	0.102332	0.212729	1	0.0822478	0.317022	1	no
Triacylglyceride 16:0_36:2	0.106367	0.195144	1	0.0827002	0.314359	1	no
Triacylglyceride 16:0_36:3	0.104371	0.203708	1	0.0769472	0.349319	1	no
Triacylglyceride 16:0_36:4	0.0858834	0.29603	1	0.0599343	0.466273	1	no
Triacylglyceride 16:0_36:5	0.0724328	0.378397	1	0.0543107	0.509196	1	no
Triacylglyceride 16:0_36:6	0.0957631	0.243726	1	0.0855784	0.297754	1	no
Triacylglyceride 16:0_37:3	0.0192221	0.815393	1	0.010839	0.895267	1	no
Triacylglyceride 16:0_38:1	0.0123738	0.880539	1	0.00545329	0.947194	1	no
Triacylglyceride 16:0_38:2	0.053587	0.514864	1	0.0400603	0.626451	1	no
Triacylglyceride 16:0_38:3	0.0880138	0.284167	1	0.0688735	0.402332	1	no
Triacylglyceride 16:0_38:4	0.0806193	0.326732	1	0.06088	0.459255	1	no
Triacylglyceride 16:0_38:5	0.0721198	0.380466	1	0.0474528	0.564183	1	no
Triacylglyceride 16:0_38:6	0.0795751	0.333057	1	0.0478682	0.560774	1	no
Triacylglyceride 16:0_38:7	0.100085	0.222999	1	0.0669899	0.415355	1	no
Triacylglyceride 16:0_40:6	0.154178	0.0595959	1	0.124474	0.129103	1	no
Triacylglyceride 16:0_40:7	0.178787	0.028594	1	0.144752	0.0771735	1	no
Triacylglyceride 16:0_40:8	0.141588	0.0839331	1	0.107033	0.192348	1	no
Triacylglyceride 16:1_28:0	-0.180301	0.0272524	1	-0.178981	0.0284193	1	no
Triacylglyceride 16:1_30:1	-0.115777	0.158288	1	-0.121074	0.139976	1	no
Triacylglyceride 16:1_32:0	-0.00980224	0.905235	1	-0.0192692	0.81495	1	no
Triacylglyceride 16:1_32:1	-0.00365549	0.964589	1	-0.00523369	0.949318	1	no
Triacylglyceride 16:1_32:2	-0.00940467	0.909062	1	-0.0112224	0.891584	1	no
Triacylglyceride 16:1_33:1	0.0159254	0.846626	1	0.00503557	0.951234	1	no
Triacylglyceride 16:1_34:0	0.0696409	0.397097	1	0.0641625	0.435357	1	no
Triacylglyceride 16:1_34:1	0.0377634	0.646378	1	0.0264068	0.748387	1	no
Triacylglyceride 16:1_34:2	0.0471438	0.566726	1	0.0368027	0.654788	1	no
Triacylglyceride 16:1_34:3	0.05279	0.521145	1	0.0486288	0.554557	1	no
Triacylglyceride 16:1_36:1	0.104358	0.203764	1	0.0914807	0.26555	1	no
Triacylglyceride 16:1_36:2	0.150364	0.0662651	1	0.1369	0.0948152	1	no
Triacylglyceride 16:1_36:3	0.139869	0.0878027	1	0.124021	0.130513	1	no
Triacylglyceride 16:1_36:4	0.104834	0.201697	1	0.0889276	0.279177	1	no
Triacylglyceride 16:1_36:5	0.0964799	0.240199	1	0.0891912	0.277749	1	no
Triacylglyceride 16:1_38:3	0.138611	0.0907212	1	0.133334	0.103819	1	no
Triacylglyceride 16:1_38:4	0.0379961	0.644347	1	0.0294334	0.720683	1	no
Triacylglyceride 16:1_38:5	0.0699508	0.394994	1	0.0513748	0.532392	1	no
Triacylglyceride 17:0_32:1	-0.0230869	0.77915	1	-0.0233273	0.77691	1	no
Triacylglyceride 17:0_34:1	0.0545225	0.507543	1	0.0407472	0.620544	1	no
Triacylglyceride 17:0_34:2	0.0335755	0.683355	1	0.0189203	0.818241	1	no
Triacylglyceride 17:0_34:3	0.0917655	0.264058	1	0.0836834	0.308621	1	no
Triacylglyceride 17:0_36:3	0.1975	0.0154121	1	0.171035	0.0363795	1	no
Triacylglyceride 17:0_36:4	0.179741	0.0277427	1	0.152202	0.0629795	1	no
Triacylglyceride 17:1_32:1	0.00723116	0.930017	1	0.00827427	0.919953	1	no
Triacylglyceride 17:1_34:1	0.0976791	0.234377	1	0.0807983	0.325655	1	no
Triacylglyceride 17:1_34:2	0.128659	0.116628	1	0.10619	0.195896	1	no
Triacylglyceride 17:1_34:3	0.142181	0.0826328	1	0.134258	0.101425	1	no
Triacylglyceride 17:1_36:3	0.237943	0.00336733	1	0.21663	0.00775241	1	no
Triacylglyceride 17:1_36:4	0.185827	0.022802	1	0.155621	0.0572215	1	no
Triacylglyceride 17:1_36:5	0.0734075	0.371997	1	0.0597877	0.467366	1	no
Triacylglyceride 17:2_34:2	0.029298	0.721915	1	0.000282282	0.997265	1	no
Triacylglyceride 17:2_34:3	0.0489143	0.552231	1	0.0510344	0.535115	1	no
Triacylglyceride 17:2_36:2	0.121147	0.139738	1	0.091632	0.264757	1	no
Triacylglyceride 17:2_36:3	0.14862	0.0695106	1	0.121018	0.140161	1	no
Triacylglyceride 17:2_36:4	0.14011	0.0872513	1	0.114481	0.163027	1	no
Triacylglyceride 17:2_38:5	0.151759	0.0637588	1	0.123932	0.130794	1	no
Triacylglyceride 17:2_38:6	0.0183054	0.824051	1	-0.000655336	0.99365	1	no
Triacylglyceride 17:2_38:7	0.143388	0.0800308	1	0.163324	0.0458252	1	no
Triacylglyceride 18:0_30:0	-0.10089	0.219279	1	-0.108405	0.186676	1	no
Triacylglyceride 18:0_30:1	-0.134752	0.100161	1	-0.137572	0.0931916	1	no
Triacylglyceride 18:0_32:0	0.0093106	0.909967	1	-0.0052204	0.949446	1	no
Triacylglyceride 18:0_32:1	-0.00859007	0.916909	1	-0.0198763	0.809228	1	no
Triacylglyceride 18:0_32:2	-0.0269563	0.743332	1	-0.031842	0.69889	1	no
Triacylglyceride 18:0_34:2	0.00931682	0.909908	1	-0.0125123	0.879213	1	no
Triacylglyceride 18:0_34:3	0.0763619	0.353007	1	0.0552713	0.501722	1	no
Triacylglyceride 18:0_36:1	-0.0341936	0.677847	1	-0.032518	0.692817	1	no
Triacylglyceride 18:0_36:2	0.0803486	0.328364	1	0.054743	0.505825	1	no
Triacylglyceride 18:0_36:3	0.134435	0.100972	1	0.107713	0.189521	1	no
Triacylglyceride 18:0_36:4	0.113944	0.165022	1	0.0863521	0.293392	1	no
Triacylglyceride 18:0_36:5	0.126799	0.12205	1	0.103739	0.206476	1	no
Triacylglyceride 18:0_38:6	0.22775	0.00506364	1	0.187893	0.0213066	1	no
Triacylglyceride 18:0_38:7	0.13656	0.0956476	1	0.107288	0.191285	1	no
Triacylglyceride 18:1_26:0	-0.105443	0.199078	1	-0.0990212	0.227981	1	no
Triacylglyceride 18:1_28:1	-0.0662835	0.420301	1	-0.0626317	0.446412	1	no
Triacylglyceride 18:1_30:0	-0.0437397	0.595091	1	-0.0527282	0.521633	1	no
Triacylglyceride 18:1_30:1	-0.0540584	0.511168	1	-0.0561434	0.494986	1	no
Triacylglyceride 18:1_30:2	-0.0941072	0.252012	1	-0.0974558	0.235454	1	no
Triacylglyceride 18:1_31:0	0.0209498	0.799138	1	0.0206099	0.80233	1	no
Triacylglyceride 18:1_32:0	0.0149439	0.855972	1	-0.00320841	0.968917	1	no
Triacylglyceride 18:1_32:1	0.0376634	0.647251	1	0.0280706	0.733115	1	no
Triacylglyceride 18:1_32:2	0.00804195	0.922194	1	-0.00112212	0.989127	1	no
Triacylglyceride 18:1_32:3	0.00929628	0.910105	1	0.00210246	0.979629	1	no
Triacylglyceride 18:1_33:0	0.0960113	0.242501	1	0.0791464	0.335676	1	no
Triacylglyceride 18:1_33:1	0.141475	0.0841848	1	0.126123	0.12407	1	no
Triacylglyceride 18:1_33:2	0.143263	0.0802983	1	0.129676	0.113741	1	no
Triacylglyceride 18:1_33:3	0.0668518	0.416319	1	0.0586378	0.475988	1	no
Triacylglyceride 18:1_34:1	0.112113	0.171964	1	0.0880642	0.283889	1	no
Triacylglyceride 18:1_34:2	0.110846	0.176892	1	0.0866675	0.291626	1	no
Triacylglyceride 18:1_34:3	0.126578	0.122708	1	0.107734	0.189436	1	no
Triacylglyceride 18:1_34:4	0.115011	0.161075	1	0.098615	0.229904	1	no
Triacylglyceride 18:1_35:2	0.20817	0.0105794	1	0.193337	0.0177645	1	no
Triacylglyceride 18:1_35:3	0.214878	0.00827561	1	0.20488	0.0119032	1	no
Triacylglyceride 18:1_36:0	0.0326518	0.691617	1	0.0232964	0.777198	1	no
Triacylglyceride 18:1_36:1	0.0984833	0.23053	1	0.0747618	0.363215	1	no
Triacylglyceride 18:1_36:2	0.132213	0.106784	1	0.112954	0.16875	1	no
Triacylglyceride 18:1_36:3	0.124805	0.128082	1	0.108263	0.187259	1	no
Triacylglyceride 18:1_36:4	0.099561	0.225443	1	0.0850303	0.300871	1	no
Triacylglyceride 18:1_36:5	0.133634	0.103037	1	0.121583	0.138305	1	no
Triacylglyceride 18:1_36:6	0.129218	0.115033	1	0.115039	0.160973	1	no
Triacylglyceride 18:1_38:5	0.210418	0.00975111	1	0.180914	0.026725	1	no
Triacylglyceride 18:1_38:6	0.204492	0.0120685	1	0.168446	0.0393482	1	no
Triacylglyceride 18:1_38:7	0.199505	0.0143794	1	0.167659	0.0402902	1	no
Triacylglyceride 18:2_28:0	-0.112023	0.172308	1	-0.115365	0.159783	1	no
Triacylglyceride 18:2_30:0	-0.0772357	0.347509	1	-0.0891928	0.27774	1	no
Triacylglyceride 18:2_30:1	-0.0900211	0.273284	1	-0.0941123	0.251987	1	no
Triacylglyceride 18:2_31:0	-0.0907865	0.269209	1	-0.0615335	0.45444	1	no
Triacylglyceride 18:2_32:0	-0.000216733	0.9979	1	-0.0199741	0.808308	1	no
Triacylglyceride 18:2_32:1	0.0075169	0.927259	1	-0.00479213	0.953589	1	no
Triacylglyceride 18:2_32:2	-0.0220974	0.788387	1	-0.0329546	0.688905	1	no
Triacylglyceride 18:2_33:0	0.0804163	0.327955	1	0.0613858	0.455526	1	no
Triacylglyceride 18:2_33:1	0.135661	0.0978713	1	0.118537	0.148535	1	no
Triacylglyceride 18:2_33:2	0.112373	0.170965	1	0.0978981	0.233325	1	no
Triacylglyceride 18:2_34:0	0.0720656	0.380826	1	0.0440301	0.592647	1	no
Triacylglyceride 18:2_34:1	0.106411	0.194961	1	0.0801025	0.329853	1	no
Triacylglyceride 18:2_34:2	0.0879853	0.284323	1	0.0634072	0.440793	1	no
Triacylglyceride 18:2_34:3	0.0937875	0.253634	1	0.076355	0.353051	1	no
Triacylglyceride 18:2_34:4	0.0751357	0.360814	1	0.0657927	0.423758	1	no
Triacylglyceride 18:2_35:1	0.196262	0.0160817	1	0.171007	0.0364104	1	no
Triacylglyceride 18:2_35:2	0.17973	0.0277522	1	0.164572	0.0441705	1	no
Triacylglyceride 18:2_35:3	0.142329	0.0823099	1	0.130949	0.110207	1	no
Triacylglyceride 18:2_36:0	0.0615446	0.454358	1	0.0353846	0.667283	1	no
Triacylglyceride 18:2_36:1	0.11652	0.155616	1	0.0900018	0.273387	1	no
Triacylglyceride 18:2_36:2	0.113828	0.165457	1	0.0960099	0.242508	1	no
Triacylglyceride 18:2_36:3	0.0834511	0.30997	1	0.0690551	0.40109	1	no
Triacylglyceride 18:2_36:4	0.0601217	0.464877	1	0.0487223	0.553794	1	no
Triacylglyceride 18:2_36:5	0.0808821	0.325152	1	0.069407	0.398689	1	no
Triacylglyceride 18:2_38:4	0.167934	0.039959	1	0.139284	0.0891507	1	no
Triacylglyceride 18:2_38:5	0.192003	0.0185816	1	0.158814	0.0522427	1	no
Triacylglyceride 18:2_38:6	0.172874	0.0343869	1	0.133499	0.103389	1	no
Triacylglyceride 18:3_30:0	-0.0488796	0.552514	1	-0.0547141	0.50605	1	no
Triacylglyceride 18:3_32:0	-0.0140422	0.864577	1	-0.0292652	0.722214	1	no
Triacylglyceride 18:3_32:1	0.0068879	0.933331	1	0.000465416	0.99549	1	no
Triacylglyceride 18:3_34:0	0.059206	0.471717	1	0.0328183	0.690125	1	no
Triacylglyceride 18:3_34:1	0.102675	0.211192	1	0.0808768	0.325184	1	no
Triacylglyceride 18:3_34:2	0.0749679	0.36189	1	0.0558029	0.49761	1	no
Triacylglyceride 18:3_34:3	0.083768	0.308129	1	0.0746814	0.363733	1	no
Triacylglyceride 18:3_35:2	0.205631	0.0115888	1	0.203952	0.012302	1	no
Triacylglyceride 18:3_36:1	0.167006	0.041087	1	0.141951	0.0831345	1	no
Triacylglyceride 18:3_36:2	0.153466	0.0607972	1	0.138078	0.0919812	1	no
Triacylglyceride 18:3_36:3	0.124635	0.128605	1	0.111989	0.172442	1	no
Triacylglyceride 18:3_36:4	0.0791657	0.335558	1	0.0708361	0.389025	1	no
Triacylglyceride 18:3_38:5	0.205875	0.0114881	1	0.179152	0.0282654	1	no
Triacylglyceride 18:3_38:6	0.184187	0.0240526	1	0.151193	0.0647656	1	no
Triacylglyceride 20:0_32:3	0.0892997	0.277162	1	0.0694668	0.398281	1	no
Triacylglyceride 20:0_32:4	0.0959515	0.242796	1	0.072911	0.375249	1	no
Triacylglyceride 20:0_34:1	-0.0741602	0.367101	1	-0.0788276	0.337633	1	no
Triacylglyceride 20:1_32:1	-0.0362955	0.659246	1	-0.042619	0.604568	1	no
Triacylglyceride 20:1_32:2	0.0746985	0.363623	1	0.0527888	0.521154	1	no
Triacylglyceride 20:1_32:3	0.112922	0.16887	1	0.109344	0.182869	1	no
Triacylglyceride 20:1_34:0	0.00235756	0.977158	1	0.0125335	0.879009	1	no
Triacylglyceride 20:1_34:1	0.0815821	0.320968	1	0.0759641	0.355528	1	no
Triacylglyceride 20:1_34:2	0.081686	0.320351	1	0.0708935	0.38864	1	no
Triacylglyceride 20:1_34:3	0.164796	0.0438783	1	0.144208	0.0783022	1	no
Triacylglyceride 20:2_32:0	0.066639	0.417807	1	0.0438329	0.594306	1	no
Triacylglyceride 20:2_32:1	0.0480153	0.559569	1	0.036698	0.655708	1	no
Triacylglyceride 20:2_34:1	0.0879383	0.284581	1	0.0681541	0.407277	1	no
Triacylglyceride 20:2_34:2	0.0818773	0.319215	1	0.0588789	0.474173	1	no
Triacylglyceride 20:2_34:3	0.125572	0.125735	1	0.11005	0.180038	1	no
Triacylglyceride 20:2_34:4	0.0549346	0.504335	1	0.0773757	0.346634	1	no
Triacylglyceride 20:2_36:5	0.122483	0.13539	1	0.143892	0.078965	1	no
Triacylglyceride 20:3_32:0	0.0239303	0.7713	1	0.0122813	0.881426	1	no
Triacylglyceride 20:3_32:1	-0.00691491	0.93307	1	-0.0160456	0.845482	1	no
Triacylglyceride 20:3_32:2	0.0349142	0.671448	1	0.0403537	0.623925	1	no
Triacylglyceride 20:3_34:0	0.0896933	0.275042	1	0.0751764	0.360553	1	no
Triacylglyceride 20:3_34:1	0.0894259	0.276481	1	0.070757	0.389556	1	no
Triacylglyceride 20:3_34:2	0.0876823	0.285991	1	0.0680013	0.408332	1	no
Triacylglyceride 20:3_34:3	0.0643818	0.433786	1	0.0489378	0.55204	1	no
Triacylglyceride 20:3_36:3	0.177915	0.0293921	1	0.158233	0.0531198	1	no
Triacylglyceride 20:3_36:4	0.137845	0.0925365	1	0.122635	0.134903	1	no
Triacylglyceride 20:3_36:5	0.184632	0.0237075	1	0.149966	0.0669941	1	no
Triacylglyceride 20:4_30:0	-0.0654205	0.42639	1	-0.0727269	0.376459	1	no
Triacylglyceride 20:4_32:0	-0.0146695	0.858589	1	-0.0352114	0.668815	1	no
Triacylglyceride 20:4_32:1	-0.0238592	0.771961	1	-0.0332815	0.68598	1	no
Triacylglyceride 20:4_32:2	-0.0508462	0.536624	1	-0.064291	0.434437	1	no
Triacylglyceride 20:4_33:2	0.0698114	0.39594	1	0.0673619	0.412763	1	no
Triacylglyceride 20:4_34:0	0.0623149	0.44872	1	0.036936	0.653619	1	no
Triacylglyceride 20:4_34:1	0.0778396	0.343741	1	0.0522107	0.525734	1	no
Triacylglyceride 20:4_34:2	0.0534942	0.515594	1	0.0252904	0.75869	1	no
Triacylglyceride 20:4_34:3	0.0554889	0.500036	1	0.0344856	0.675252	1	no
Triacylglyceride 20:4_35:3	0.132521	0.105963	1	0.142226	0.0825334	1	no
Triacylglyceride 20:4_36:2	0.201008	0.0136455	1	0.164501	0.0442629	1	no
Triacylglyceride 20:4_36:3	0.123902	0.130885	1	0.0911067	0.267517	1	no
Triacylglyceride 20:4_36:4	0.0849601	0.301272	1	0.0608661	0.459358	1	no
Triacylglyceride 20:4_36:5	0.0439856	0.593021	1	0.0289916	0.724705	1	no
Triacylglyceride 20:5_34:0	0.222274	0.00626074	1	0.193326	0.0177712	1	no
Triacylglyceride 20:5_34:1	0.192876	0.0180431	1	0.162201	0.0473584	1	no
Triacylglyceride 20:5_34:2	0.184855	0.023536	1	0.151168	0.0648109	1	no
Triacylglyceride 20:5_36:2	0.252113	0.00185606	0.92246	0.226119	0.00539669	1	no
Triacylglyceride 20:5_36:3	0.206712	0.0111493	1	0.183961	0.0242291	1	no
Triacylglyceride 22:2_32:4	-0.115863	0.157973	1	-0.0889816	0.278884	1	no
Triacylglyceride 22:4_32:0	0.0617476	0.452869	1	0.0480038	0.559663	1	no
Triacylglyceride 22:4_32:2	0.0657438	0.424103	1	0.0530498	0.519093	1	no
Triacylglyceride 22:4_34:2	0.0542982	0.509293	1	0.0339355	0.680145	1	no
Triacylglyceride 22:5_32:0	0.0919816	0.262931	1	0.0738596	0.369051	1	no
Triacylglyceride 22:5_32:1	0.0479839	0.559826	1	0.0311027	0.705554	1	no
Triacylglyceride 22:5_34:1	0.164619	0.0441095	1	0.135982	0.0970733	1	no
Triacylglyceride 22:5_34:2	0.152288	0.0628279	1	0.120547	0.141722	1	no
Triacylglyceride 22:5_34:3	0.192946	0.018001	1	0.171945	0.0353815	1	no
Triacylglyceride 22:6_32:0	0.0807562	0.325908	1	0.0570368	0.488136	1	no
Triacylglyceride 22:6_32:1	0.0578453	0.481981	1	0.040316	0.624249	1	no
Triacylglyceride 22:6_34:1	0.151254	0.0646561	1	0.120501	0.141876	1	no
Triacylglyceride 22:6_34:2	0.140948	0.0853568	1	0.11086	0.176835	1	no
Triacylglyceride 22:6_34:3	0.145512	0.0756154	1	0.128112	0.118201	1	no

## Sheet: Black men
Metabolite	Pearson correlation coefficient (R) (log2 concentration with age)	p-value (log2 concentration with age)	q-value (log2 concentration with age)	Pearson correlation coefficient (R2) (log2 concentration with age^2)	p-value (log2 concentration with age^2)	q-value (log2 concentration with age^2)	Significant association
Alanine	0.0952399	0.294703	1	0.0776241	0.393442	1	no
Arginine	0.186086	0.0393257	1	0.158389	0.0801616	1	no
Asparagine	0.0824733	0.36447	1	0.0936468	0.30289	1	no
Aspartic Acid	0.350451	7.07407e-05	0.0351581	0.340557	0.000116076	0.0576898	linear
Cysteine	0.504375	2.71591e-09	1.34981e-06	0.489333	9.28547e-09	4.61488e-06	linear
Glutamine	0.289428	0.00116661	0.579807	0.296295	0.000876084	0.435414	no
Glutamic Acid	-0.0388654	0.669526	1	-0.0772503	0.395731	1	no
Glycine	0.117733	0.194663	1	0.14589	0.107374	1	no
Histidine	-0.0173257	0.84915	1	-0.0335559	0.712532	1	no
Isoleucine	-0.0485008	0.594226	1	-0.0691944	0.446968	1	no
Leucine	-0.118151	0.193072	1	-0.154426	0.0881151	1	no
Lysine	0.028498	0.754361	1	0.00721564	0.936866	1	no
Methionine	0.167623	0.0638564	1	0.151337	0.0947394	1	no
Phenylalanine	0.263289	0.00325784	1	0.241414	0.00714554	1	no
Proline	0.151342	0.0947291	1	0.141284	0.119057	1	no
Serine	-0.0352003	0.699109	1	-0.0320371	0.72501	1	no
Threonine	-0.0301488	0.740624	1	-0.0283363	0.755711	1	no
Tryptophan	-0.129571	0.153186	1	-0.157826	0.0812561	1	no
Tyrosine	0.120493	0.184332	1	0.103676	0.253805	1	no
Valine	-0.0312381	0.731603	1	-0.0638824	0.482695	1	no
Cholic acid	0.195856	0.0299284	1	0.231476	0.00999301	1	no
Chenodeoxycholic acid	0.0313102	0.731008	1	0.0594742	0.51347	1	no
Deoxycholic acid	0.115614	0.202874	1	0.146313	0.106348	1	no
Glycocholic acid	0.12851	0.156609	1	0.131107	0.148333	1	no
Glycochenodeoxycholic acid	-0.0133569	0.883425	1	0.00608452	0.946747	1	no
Glycodeoxycholic acid	0.0933673	0.304342	1	0.115398	0.203726	1	no
Glycolithocholic acid	0.0349842	0.700868	1	0.0512659	0.573345	1	no
Glycolithocholic acid sulfate	0.200909	0.0258667	1	0.209859	0.0198223	1	no
Glycoursodeoxycholic acid	0.0809917	0.373179	1	0.100674	0.267885	1	no
Taurocholic acid	0.177427	0.0496146	1	0.163076	0.0715105	1	no
Taurochenodeoxycholic acid	0.138374	0.126929	1	0.138835	0.125656	1	no
Taurodeoxycholic acid	0.182963	0.0428085	1	0.185674	0.0397716	1	no
Tauro-muricholic acids	0.209755	0.0198851	1	0.231265	0.0100631	1	no
gamma-Amino butyric acid	0.164703	0.0686913	1	0.173227	0.0553548	1	no
Putrescine	0.250524	0.00519326	1	0.240313	0.00742086	1	no
Serotonin	0.151297	0.0948276	1	0.119154	0.189294	1	no
beta-Alanine	0.0756104	0.405867	1	0.0868469	0.339502	1	no
Arachidonic acid (AA, omega-6-FA(20:4))	-0.221792	0.0136836	1	-0.237315	0.00821881	1	no
Docosahexaenoic acid (DHA, omega-3-FA(22:6))	0.150246	0.0971713	1	0.104614	0.249509	1	no
Eicosapentaenoic acid	0.0299438	0.742325	1	-0.00351203	0.969247	1	no
Octadecenoic acid	0.0334166	0.713674	1	0.0285534	0.753898	1	no
Octadecadienoic acid	-0.286973	0.00129019	0.641225	-0.267314	0.00279919	1	no
Eicosenoic acid	0.0588614	0.517826	1	0.0486943	0.592754	1	no
Eicosadienoic acid	-0.0843976	0.353348	1	-0.086181	0.343231	1	no
Eicosatrienoic acid	-0.156827	0.0832258	1	-0.163454	0.0708485	1	no
Aconitic acid	0.42469	9.79343e-07	0.000486734	0.417807	1.52305e-06	0.000756955	linear
Hippuric acid	0.337437	0.00013524	0.0672143	0.351623	6.66351e-05	0.0331177	non-linear
Lactic acid	-0.0899518	0.32245	1	-0.0843843	0.353424	1	no
Indoleacetic acid	-0.00697862	0.938936	1	-0.0101532	0.911253	1	no
Indolepropionic acid	0.160402	0.0763487	1	0.152857	0.0914325	1	no
Indoxyl sulfate	0.222034	0.0135785	1	0.230513	0.0103161	1	no
1-Methylhistidine	0.299047	0.000779533	0.387428	0.309508	0.000494889	0.24596	no
3-Methylhistidine	0.0671232	0.460719	1	0.0522131	0.566272	1	no
5-Aminovaleric acid	0.156617	0.083644	1	0.192705	0.0327253	1	no
alpha-Aminobutyric acid	-0.0715729	0.431465	1	-0.0903693	0.3202	1	no
Asymmetric dimethylarginine	0.196087	0.0297315	1	0.203104	0.0242546	1	no
Betaine	0.0610751	0.502178	1	0.0743821	0.413558	1	no
Citrulline	0.417354	1.56739e-06	0.000778991	0.4376	4.16471e-07	0.000206986	non-linear
Creatinine	0.297802	0.000821955	0.408511	0.29875	0.000789478	0.392371	no
Cystine	0.413499	1.99807e-06	0.00099304	0.392856	6.97105e-06	0.00346461	linear
Homoarginine	-0.171758	0.0574887	1	-0.193625	0.0318862	1	no
Homocysteine	0.336914	0.000138727	0.0689474	0.33121	0.000182579	0.0907416	no
Kynurenine	0.353565	6.03196e-05	0.0299788	0.365419	3.23893e-05	0.0160975	non-linear
Methionine-Sulfoxide	0.346374	8.693e-05	0.0432042	0.356738	5.11954e-05	0.0254441	non-linear
Ornithine	0.0641738	0.480697	1	0.0760036	0.403423	1	no
Proline betaine	0.128866	0.155454	1	0.133588	0.140739	1	no
Symmetric dimethylarginine	0.33216	0.000174476	0.0867145	0.344651	9.47572e-05	0.0470943	non-linear
Sarcosine	0.153695	0.0896483	1	0.152049	0.0931782	1	no
Taurine	0.318573	0.000329277	0.163651	0.303536	0.000642781	0.319462	no
Tryptophan betaine	0.373085	2.13809e-05	0.0106263	0.350831	6.93844e-05	0.0344841	linear
alpha-Aminoadipic acid	0.183036	0.0427248	1	0.167216	0.0645136	1	no
trans-4-Hydroxyproline	0.0269796	0.767064	1	0.051696	0.570128	1	no
Trigonelline	0.39763	5.26028e-06	0.00261436	0.392844	6.97602e-06	0.00346708	linear
p-Cresol sulfate	0.348607	7.76775e-05	0.0386057	0.361418	4.00631e-05	0.0199114	non-linear
Cortisol	0.0841027	0.355038	1	0.0839121	0.356134	1	no
Cortisone	-0.191371	0.0339744	1	-0.185525	0.0399342	1	no
Dehydroepiandrosterone sulfate	-0.697121	3.3661e-19	1.67295e-16	-0.690269	1.02982e-18	5.11818e-16	linear
Hypoxanthine	0.199774	0.0267351	1	0.151507	0.0943656	1	no
Choline	0.373112	2.13497e-05	0.0106108	0.386786	9.91044e-06	0.00492549	non-linear
Trimethylamine N-oxide	0.313917	0.000406583	0.202072	0.307309	0.000545253	0.270991	no
Carnitine	0.0641552	0.480825	1	0.0533874	0.557561	1	no
Acetylcarnitine	0.229544	0.0106501	1	0.218836	0.015025	1	no
Propionylcarnitine	0.250706	0.00515967	1	0.225456	0.0121668	1	no
Butyrylcarnitine	0.378618	1.57392e-05	0.00782238	0.383156	1.21905e-05	0.0060587	non-linear
Valerylcarnitine	0.193285	0.0321946	1	0.173369	0.0551531	1	no
Decanoylcarnitine	0.179602	0.0468412	1	0.170864	0.0588187	1	no
Tetradecenoylcarnitine	0.326051	0.000233003	0.115802	0.301001	0.000717033	0.356365	no
Octadecenoylcarnitine	0.090586	0.319036	1	0.102023	0.261491	1	no
Octadecadienoylcarnitine	0.203753	0.0237951	1	0.189781	0.0355159	1	no
Lysophosphatidylcholine 16:0	0.0373569	0.681644	1	0.0435531	0.632421	1	no
Lysophosphatidylcholine 16:1	-0.0199348	0.826766	1	-0.0190517	0.834327	1	no
Lysophosphatidylcholine 17:0	-0.00957458	0.916292	1	0.0180003	0.843349	1	no
Lysophosphatidylcholine 18:0	-0.0228104	0.802256	1	-0.0149966	0.869234	1	no
Lysophosphatidylcholine 18:1	0.139255	0.124506	1	0.166489	0.0657001	1	no
Lysophosphatidylcholine 18:2	0.0909611	0.317028	1	0.130166	0.151291	1	no
Lysophosphatidylcholine 20:3	0.0160464	0.86017	1	0.0392914	0.666119	1	no
Lysophosphatidylcholine 20:4	-0.0573997	0.528293	1	-0.0321265	0.724273	1	no
Lysophosphatidylcholine 24:0	0.149833	0.0981043	1	0.107102	0.238365	1	no
Lysophosphatidylcholine 26:0	0.174001	0.0542585	1	0.171304	0.0581612	1	no
Lysophosphatidylcholine 26:1	0.336656	0.000140475	0.0698162	0.318411	0.00033173	0.16487	no
Phosphatidylcholine 24:0	-0.0560945	0.537729	1	0.00725489	0.936523	1	no
Phosphatidylcholine 28:1	0.0708668	0.436035	1	0.253617	0.00464812	1	no
Phosphatidylcholine 30:0	-0.0295859	0.745299	1	-0.0623566	0.493234	1	no
Phosphatidylcholine 32:0	0.0203718	0.823029	1	0.0434612	0.63314	1	no
Phosphatidylcholine 32:1	-0.0909748	0.316955	1	-0.0509273	0.575884	1	no
Phosphatidylcholine 32:2	-0.169662	0.0606476	1	-0.00289281	0.974667	1	no
Phosphatidylcholine 32:3	-0.230397	0.0103557	1	-0.105986	0.243319	1	no
Phosphatidylcholine 34:1	-0.0229626	0.800963	1	-0.179418	0.0470703	1	no
Phosphatidylcholine 34:2	-0.152968	0.091195	1	-0.250913	0.00512169	1	no
Phosphatidylcholine 34:3	-0.19793	0.0281997	1	-0.0457948	0.614987	1	no
Phosphatidylcholine 34:4	-0.318203	0.000334887	0.166439	-0.166381	0.0658772	1	no
Phosphatidylcholine 36:0	-0.0599183	0.510324	1	-0.202928	0.0243808	1	no
Phosphatidylcholine 36:1	-0.0930239	0.306132	1	-0.334313	0.000157338	0.0781972	no
Phosphatidylcholine 36:2	-0.133963	0.139616	1	-0.0823414	0.36524	1	no
Phosphatidylcholine 36:3	-0.0931135	0.305664	1	-0.119293	0.188774	1	no
Phosphatidylcholine 36:4	-0.279487	0.00174424	0.866887	-0.146738	0.105326	1	no
Phosphatidylcholine 36:5	0.049591	0.585952	1	-0.110864	0.222181	1	no
Phosphatidylcholine 36:6	-0.0813609	0.370997	1	-0.293565	0.000982569	0.488337	no
Phosphatidylcholine 38:0	0.107631	0.236038	1	0.0156585	0.863517	1	no
Phosphatidylcholine 38:1	-0.0121384	0.893994	1	-0.124089	0.171483	1	no
Phosphatidylcholine 38:3	-0.191586	0.0337704	1	0.066887	0.462301	1	no
Phosphatidylcholine 38:4	-0.313009	0.000423487	0.210473	-0.0434988	0.632845	1	no
Phosphatidylcholine 38:5	-0.17598	0.0515335	1	-0.215521	0.0166638	1	no
Phosphatidylcholine 38:6	0.0730223	0.422171	1	-0.333544	0.00016327	0.081145	no
Phosphatidylcholine 40:2	-0.0238197	0.793697	1	-0.203793	0.023767	1	no
Phosphatidylcholine 40:3	-0.00379095	0.966806	1	0.0188907	0.835707	1	no
Phosphatidylcholine 40:4	-0.342393	0.000106018	0.052691	-0.0547305	0.547678	1	no
Phosphatidylcholine 40:5	-0.219212	0.0148483	1	-0.0341484	0.707686	1	no
Phosphatidylcholine 40:6	0.0793283	0.383107	1	-0.344997	9.31351e-05	0.0462881	non-linear
Phosphatidylcholine 42:0	-0.0272443	0.764845	1	-0.2414	0.00714893	1	no
Phosphatidylcholine 42:1	-0.0491379	0.589385	1	0.0208386	0.819043	1	no
Phosphatidylcholine 42:2	0.0732316	0.420839	1	-0.0430345	0.636483	1	no
Phosphatidylcholine 42:4	-0.264734	0.00308594	1	-0.0762881	0.40166	1	no
Phosphatidylcholine 42:5	-0.118751	0.190807	1	0.0322742	0.723057	1	no
Phosphatidylcholine 42:6	0.00517539	0.954695	1	-0.272104	0.00232963	1	no
Phosphatidylcholine O-28:0	0.00582162	0.949045	1	-0.1523	0.0926337	1	no
Phosphatidylcholine O-28:1	0.274175	0.00214973	1	-0.0286669	0.752952	1	no
Phosphatidylcholine O-30:0	0.0503077	0.580542	1	0.0371906	0.682984	1	no
Phosphatidylcholine O-30:1	-0.00395752	0.965348	1	-0.00139827	0.987754	1	no
Phosphatidylcholine O-30:2	0.218498	0.0151853	1	0.195184	0.0305069	1	no
Phosphatidylcholine O-32:1	-0.0787764	0.386436	1	-0.0857135	0.345866	1	no
Phosphatidylcholine O-32:2	0.0204194	0.822623	1	0.00717163	0.93725	1	no
Phosphatidylcholine O-34:0	-0.0472027	0.604146	1	-0.0566039	0.534036	1	no
Phosphatidylcholine O-34:1	0.0296044	0.745145	1	0.0352492	0.698711	1	no
Phosphatidylcholine O-34:2	-0.0104922	0.908303	1	0.013876	0.878928	1	no
Phosphatidylcholine O-34:3	-0.292138	0.00104279	0.518269	-0.279597	0.00173665	0.863115	no
Phosphatidylcholine O-36:0	0.105967	0.243402	1	0.0777176	0.392871	1	no
Phosphatidylcholine O-36:1	-0.0969916	0.285871	1	-0.110297	0.224568	1	no
Phosphatidylcholine O-36:2	-0.0914313	0.314523	1	-0.0740507	0.415648	1	no
Phosphatidylcholine O-36:3	-0.100999	0.266335	1	-0.0763868	0.401049	1	no
Phosphatidylcholine O-36:4	-0.223022	0.0131571	1	-0.213866	0.0175386	1	no
Phosphatidylcholine O-36:5	-0.297961	0.000816406	0.405754	-0.302123	0.000683234	0.339567	no
Phosphatidylcholine O-38:0	-0.00730999	0.936042	1	-0.0500564	0.582437	1	no
Phosphatidylcholine O-38:1	0.207132	0.02152	1	0.220368	0.0143159	1	no
Phosphatidylcholine O-38:2	-0.0604052	0.506887	1	-0.0514514	0.571957	1	no
Phosphatidylcholine O-38:3	-0.215492	0.0166789	1	-0.215557	0.016645	1	no
Phosphatidylcholine O-38:4	-0.28518	0.00138785	0.689763	-0.267906	0.0027368	1	no
Phosphatidylcholine O-38:5	-0.150082	0.0975411	1	-0.146669	0.105491	1	no
Phosphatidylcholine O-38:6	-0.0782209	0.389804	1	-0.109772	0.226793	1	no
Phosphatidylcholine O-40:1	-0.0305922	0.736947	1	-0.0512537	0.573436	1	no
Phosphatidylcholine O-40:2	-0.116494	0.199435	1	-0.149323	0.0992679	1	no
Phosphatidylcholine O-40:3	-0.16656	0.0655832	1	-0.187074	0.0382749	1	no
Phosphatidylcholine O-40:4	-0.2539	0.00460079	1	-0.246775	0.0059303	1	no
Phosphatidylcholine O-40:5	-0.196159	0.0296702	1	-0.213264	0.0178666	1	no
Phosphatidylcholine O-40:6	0.0143814	0.874554	1	-0.0167282	0.854294	1	no
Phosphatidylcholine O-42:1	-0.101708	0.262976	1	-0.100957	0.266536	1	no
Phosphatidylcholine O-42:2	-0.0787677	0.386488	1	-0.102686	0.25839	1	no
Phosphatidylcholine O-42:3	-0.0246472	0.786698	1	-0.0538154	0.554402	1	no
Phosphatidylcholine O-42:4	-0.0959837	0.290931	1	-0.0866396	0.34066	1	no
Phosphatidylcholine O-42:5	-0.121815	0.179528	1	-0.129579	0.15316	1	no
Phosphatidylcholine O-44:3	-0.118213	0.192836	1	-0.13575	0.134364	1	no
Phosphatidylcholine O-44:4	-0.054243	0.551255	1	-0.0297141	0.744233	1	no
Phosphatidylcholine O-44:5	-0.0770242	0.39712	1	-0.0685555	0.451185	1	no
Phosphatidylcholine O-44:6	-0.254265	0.00454052	1	-0.244479	0.00642613	1	no
Sphingomyelin 33:1	0.0172972	0.849394	1	0.00869661	0.923944	1	no
Sphingomyelin 35:1	-0.0507925	0.576896	1	-0.0590557	0.516443	1	no
Sphingomyelin 41:1	-0.142339	0.116298	1	-0.181675	0.0443176	1	no
Sphingomyelin 41:2	0.0109307	0.904489	1	-0.0206554	0.820607	1	no
Sphingomyelin 43:1	-0.103194	0.256029	1	-0.134447	0.138179	1	no
Sphingomyelin 34:1	-0.0252158	0.781898	1	-0.0403543	0.657649	1	no
Sphingomyelin 34:2	0.0848044	0.351024	1	0.0577154	0.526024	1	no
Sphingomyelin 36:1	-0.107371	0.237182	1	-0.137258	0.130052	1	no
Sphingomyelin 36:2	-0.0916955	0.313121	1	-0.117166	0.196838	1	no
Sphingomyelin 38:3	-0.107765	0.235455	1	-0.133259	0.14173	1	no
Sphingomyelin 42:1	-0.127086	0.16129	1	-0.169063	0.0615767	1	no
Sphingomyelin 42:2	-0.0145686	0.872934	1	-0.0475628	0.601387	1	no
Sphingomyelin 44:1	0.0804743	0.37625	1	0.0466528	0.608371	1	no
Sphingomyelin 44:2	-0.0660522	0.46792	1	-0.0995345	0.273366	1	no
Hexose	0.145721	0.107788	1	0.114503	0.207279	1	no
Cholesteryl ester 14:0	-0.183673	0.0419954	1	-0.204065	0.0235768	1	no
Cholesteryl ester 15:0	0.0969731	0.285963	1	0.0529386	0.560883	1	no
Cholesteryl ester 16:0	-0.179495	0.0469743	1	-0.197991	0.0281505	1	no
Cholesteryl ester 16:1	-0.179995	0.046353	1	-0.195964	0.0298358	1	no
Cholesteryl ester 17:0	0.0544558	0.549692	1	0.0245653	0.78739	1	no
Cholesteryl ester 17:1	-0.166945	0.0649538	1	-0.164749	0.0686119	1	no
Cholesteryl ester 18:0	-0.226738	0.011672	1	-0.248816	0.00551835	1	no
Cholesteryl ester 18:1	-0.222331	0.0134504	1	-0.227294	0.011463	1	no
Cholesteryl ester 18:2	-0.29828	0.000805414	0.400291	-0.312762	0.000428191	0.212811	no
Cholesteryl ester 18:3	-0.336983	0.000138261	0.0687156	-0.346789	8.5133e-05	0.0423111	non-linear
Cholesteryl ester 20:3	-0.285064	0.00139438	0.693007	-0.295865	0.000892137	0.443392	no
Cholesteryl ester 20:4	-0.332274	0.000173532	0.0862454	-0.349749	7.33073e-05	0.0364338	non-linear
Cholesteryl ester 20:5	0.0327101	0.719472	1	-0.00161591	0.985848	1	no
Cholesteryl ester 22:5	-0.172077	0.05702	1	-0.191066	0.0342653	1	no
Cholesteryl ester 22:6	0.0994541	0.273756	1	0.0499461	0.583269	1	no
Ceramide d16:1/18:0	-0.0111337	0.902724	1	-0.0382477	0.674478	1	no
Ceramide d16:1/20:0	0.351489	6.70935e-05	0.0333455	0.317907	0.00033944	0.168701	linear
Ceramide d16:1/22:0	0.226741	0.0116709	1	0.19144	0.0339087	1	no
Ceramide d16:1/23:0	0.327323	0.000219493	0.109088	0.277173	0.00191143	0.949979	no
Ceramide d16:1/24:0	0.218826	0.0150296	1	0.183254	0.0424735	1	no
Ceramide d18:1/14:0	-0.0793824	0.382782	1	-0.0707005	0.437115	1	no
Ceramide d18:1/16:0	0.0333244	0.71443	1	0.0131576	0.885152	1	no
Ceramide d18:1/18:0	-0.0417925	0.646256	1	-0.0668173	0.462769	1	no
Ceramide d18:1/20:0-OH	-0.252924	0.00476554	1	-0.238823	0.00780839	1	no
Ceramide d18:1/20:0	0.0355446	0.69631	1	0.00744833	0.934835	1	no
Ceramide d18:1/22:0	0.136928	0.130986	1	0.10427	0.251079	1	no
Ceramide d18:1/23:0	0.137889	0.128279	1	0.105317	0.246323	1	no
Ceramide d18:1/24:0	0.0602445	0.50802	1	0.0260852	0.774576	1	no
Ceramide d18:1/24:1	0.217081	0.0158742	1	0.193927	0.0316154	1	no
Ceramide d18:1/25:0	0.187569	0.0377573	1	0.155094	0.0867319	1	no
Ceramide d18:1/26:0	0.317204	0.000350471	0.174184	0.283174	0.00150505	0.748009	no
Ceramide d18:1/26:1	0.291122	0.00108774	0.540606	0.258378	0.00390849	1	no
Ceramide d18:2/16:0	0.125509	0.166597	1	0.104363	0.250652	1	no
Ceramide d18:2/18:0	0.125935	0.165148	1	0.0984512	0.278648	1	no
Ceramide d18:2/20:0	0.276884	0.00193332	0.96086	0.241587	0.00710306	1	no
Ceramide d18:2/22:0	0.191844	0.0335273	1	0.171155	0.0583831	1	no
Ceramide d18:2/23:0	0.228314	0.011088	1	0.208911	0.020399	1	no
Ceramide d18:2/24:0	0.0586344	0.519444	1	0.0393779	0.665428	1	no
Ceramide d18:2/24:1	0.210066	0.0196988	1	0.188335	0.0369685	1	no
Dihydroceramide d18:0/22:0	-0.205851	0.0223594	1	-0.216885	0.0159716	1	no
Dihydroceramide d18:0/24:0	0.0267932	0.768628	1	-0.0150524	0.868752	1	no
Dihydroceramide d18:0/24:1	0.0943437	0.299291	1	0.064452	0.478793	1	no
Diacylglyceride 16:0_18:1	-0.0421594	0.643363	1	-0.0546425	0.548322	1	no
Diacylglyceride 16:0_18:2	-0.160925	0.0753834	1	-0.171931	0.0572329	1	no
Diacylglyceride 16:1_18:2	-0.0731249	0.421518	1	-0.0979312	0.281207	1	no
Diacylglyceride 17:0_18:1	0.190689	0.0346284	1	0.173816	0.0545191	1	no
Diacylglyceride 18:1_18:1	0.0299235	0.742494	1	0.00880006	0.923042	1	no
Diacylglyceride 18:1_18:2	-0.0255957	0.778697	1	-0.0535839	0.55611	1	no
Diacylglyceride 18:2_18:2	-0.117959	0.193803	1	-0.141365	0.118842	1	no
Diacylglyceride 18:2_18:3	-0.118945	0.190076	1	-0.109129	0.229543	1	no
Dihexosylceramide d18:1/14:0	-0.101067	0.266014	1	-0.129478	0.153482	1	no
Dihexosylceramide d18:1/16:0	-0.0585888	0.51977	1	-0.082761	0.362794	1	no
Dihexosylceramide d18:1/18:0	0.114906	0.205672	1	0.0857593	0.345607	1	no
Dihexosylceramide d18:1/20:0	0.265792	0.00296531	1	0.221399	0.0138555	1	no
Dihexosylceramide d18:1/22:0	0.216135	0.0163492	1	0.17904	0.0475449	1	no
Dihexosylceramide d18:1/24:0	0.183431	0.0422714	1	0.15846	0.0800256	1	no
Dihexosylceramide d18:1/24:1	0.079787	0.380354	1	0.0628571	0.489764	1	no
Trihexosylceramide d18:1/16:0	0.274751	0.00210192	1	0.249826	0.00532403	1	no
Trihexosylceramide d18:1/18:0	0.0795252	0.381924	1	0.0736994	0.41787	1	no
Trihexosylceramide d18:1/24:1	0.321445	0.000288629	0.143449	0.303172	0.000652962	0.324522	no
Trihexosylceramide d18:1/26:1	0.163503	0.0707622	1	0.154108	0.0887804	1	no
Trihexosylceramide d18:1/20:0	-0.194654	0.0309705	1	-0.202307	0.0248297	1	no
Trihexosylceramide d18:1/22:0	0.216645	0.0160914	1	0.200159	0.0264381	1	no
Hexosylceramide d16:1/22:0	0.0216983	0.811713	1	-0.0140874	0.877098	1	no
Hexosylceramide d16:1/24:0	-0.16314	0.0713984	1	-0.187799	0.0375187	1	no
Hexosylceramide d18:1/16:0	0.0749436	0.410032	1	0.0588908	0.517617	1	no
Hexosylceramide d18:1/18:0	-0.0308575	0.734751	1	-0.0469314	0.606229	1	no
Hexosylceramide d18:1/18:1	0.265327	0.00301777	1	0.232257	0.00973764	1	no
Hexosylceramide d18:1/20:0	0.179094	0.0474763	1	0.17424	0.0539234	1	no
Hexosylceramide d18:1/22:0	-0.00754169	0.93402	1	-0.0143127	0.875148	1	no
Hexosylceramide d18:1/23:0	-0.046875	0.606662	1	-0.0503738	0.580044	1	no
Hexosylceramide d18:1/24:0	-0.118721	0.190919	1	-0.123666	0.172958	1	no
Hexosylceramide d18:1/24:1	0.138986	0.125242	1	0.129851	0.152294	1	no
Hexosylceramide d18:1/26:0	0.00107372	0.990596	1	-0.0137571	0.879957	1	no
Hexosylceramide d18:2/18:0	0.258137	0.0039432	1	0.246596	0.00596773	1	no
Hexosylceramide d18:2/22:0	0.0685399	0.451288	1	0.0607211	0.504664	1	no
Hexosylceramide d18:2/23:0	0.117121	0.197011	1	0.113039	0.213183	1	no
Hexosylceramide d18:2/24:0	-0.00264493	0.976837	1	-0.0234216	0.79707	1	no
Triacylglyceride 14:0_32:2	-0.115065	0.205043	1	-0.126334	0.163803	1	no
Triacylglyceride 14:0_34:0	-0.0122659	0.892887	1	-0.0223857	0.805864	1	no
Triacylglyceride 14:0_34:1	-0.0414923	0.648627	1	-0.0524653	0.564396	1	no
Triacylglyceride 14:0_34:2	-0.075385	0.407272	1	-0.0882296	0.331839	1	no
Triacylglyceride 14:0_34:3	-0.112263	0.216364	1	-0.121679	0.180021	1	no
Triacylglyceride 14:0_35:1	0.0599996	0.509749	1	0.0465979	0.608793	1	no
Triacylglyceride 14:0_35:2	-0.131552	0.146948	1	-0.141063	0.119641	1	no
Triacylglyceride 14:0_36:1	-0.0506363	0.578069	1	-0.0639229	0.482418	1	no
Triacylglyceride 14:0_36:2	-0.0115973	0.898694	1	-0.028158	0.757199	1	no
Triacylglyceride 14:0_36:3	-0.0848561	0.35073	1	-0.101701	0.263011	1	no
Triacylglyceride 14:0_36:4	-0.136577	0.131987	1	-0.150661	0.096241	1	no
Triacylglyceride 14:0_38:4	-0.0668923	0.462266	1	-0.0817092	0.368946	1	no
Triacylglyceride 14:0_38:5	-0.0489801	0.590582	1	-0.0726406	0.424608	1	no
Triacylglyceride 16:0_28:1	-0.0765882	0.399805	1	-0.0638994	0.482579	1	no
Triacylglyceride 16:0_28:2	-0.0397812	0.662211	1	-0.0467133	0.607905	1	no
Triacylglyceride 16:0_30:2	-0.0554074	0.542729	1	-0.0539582	0.55335	1	no
Triacylglyceride 16:0_32:0	0.0458153	0.614829	1	0.0373387	0.681791	1	no
Triacylglyceride 16:0_32:1	-0.0577227	0.525971	1	-0.0689484	0.448589	1	no
Triacylglyceride 16:0_32:2	-0.0842026	0.354465	1	-0.0947696	0.297105	1	no
Triacylglyceride 16:0_32:3	-0.0941847	0.300109	1	-0.0978764	0.281477	1	no
Triacylglyceride 16:0_33:1	-0.0589657	0.517083	1	-0.0681275	0.454022	1	no
Triacylglyceride 16:0_33:2	-0.0630244	0.488607	1	-0.0669194	0.462084	1	no
Triacylglyceride 16:0_34:0	0.0141011	0.876979	1	0.00482997	0.957716	1	no
Triacylglyceride 16:0_34:1	0.00883261	0.922758	1	-0.00672247	0.941173	1	no
Triacylglyceride 16:0_34:2	-0.0381638	0.675152	1	-0.0567094	0.533273	1	no
Triacylglyceride 16:0_34:3	-0.099194	0.275019	1	-0.117041	0.197317	1	no
Triacylglyceride 16:0_34:4	-0.115904	0.201738	1	-0.131619	0.14674	1	no
Triacylglyceride 16:0_35:1	-0.0570407	0.53088	1	-0.0631165	0.487971	1	no
Triacylglyceride 16:0_35:2	-0.0710481	0.434859	1	-0.0844693	0.352938	1	no
Triacylglyceride 16:0_35:3	-0.110514	0.22365	1	-0.121951	0.179039	1	no
Triacylglyceride 16:0_36:2	0.0439368	0.629422	1	0.0186524	0.837751	1	no
Triacylglyceride 16:0_36:3	-0.0290657	0.749628	1	-0.0582012	0.52254	1	no
Triacylglyceride 16:0_36:4	-0.0991902	0.275038	1	-0.123677	0.172921	1	no
Triacylglyceride 16:0_36:5	-0.09784	0.281657	1	-0.113547	0.211123	1	no
Triacylglyceride 16:0_36:6	-0.0568612	0.532175	1	-0.0733243	0.420249	1	no
Triacylglyceride 16:0_37:3	-0.151769	0.0937896	1	-0.163246	0.0712125	1	no
Triacylglyceride 16:0_38:1	0.0259248	0.775926	1	0.00864496	0.924394	1	no
Triacylglyceride 16:0_38:2	0.0433137	0.634295	1	0.0148547	0.87046	1	no
Triacylglyceride 16:0_38:3	-0.022818	0.802191	1	-0.0506611	0.577883	1	no
Triacylglyceride 16:0_38:4	-0.0988334	0.276776	1	-0.126501	0.163243	1	no
Triacylglyceride 16:0_38:5	-0.0970699	0.28548	1	-0.124811	0.168984	1	no
Triacylglyceride 16:0_38:6	-0.0730533	0.421974	1	-0.108982	0.230176	1	no
Triacylglyceride 16:0_38:7	-0.00736638	0.93555	1	-0.0505811	0.578485	1	no
Triacylglyceride 16:0_40:6	-0.0770079	0.39722	1	-0.107256	0.237686	1	no
Triacylglyceride 16:0_40:7	-0.00234009	0.979506	1	-0.0458763	0.614357	1	no
Triacylglyceride 16:0_40:8	0.0523615	0.565168	1	-0.00669593	0.941405	1	no
Triacylglyceride 16:1_28:0	-0.108479	0.232348	1	-0.116776	0.19834	1	no
Triacylglyceride 16:1_30:1	-0.0982782	0.279497	1	-0.098488	0.278467	1	no
Triacylglyceride 16:1_32:0	-0.0440953	0.628185	1	-0.0583	0.521833	1	no
Triacylglyceride 16:1_32:1	-0.12733	0.16048	1	-0.14552	0.108279	1	no
Triacylglyceride 16:1_32:2	-0.161939	0.0735367	1	-0.177689	0.0492736	1	no
Triacylglyceride 16:1_33:1	-0.0479306	0.598575	1	-0.0623018	0.493615	1	no
Triacylglyceride 16:1_34:0	-0.049723	0.584954	1	-0.0627511	0.490498	1	no
Triacylglyceride 16:1_34:1	-0.0380985	0.675676	1	-0.0578238	0.525245	1	no
Triacylglyceride 16:1_34:2	-0.0912234	0.315629	1	-0.113297	0.212135	1	no
Triacylglyceride 16:1_34:3	-0.13227	0.144735	1	-0.150623	0.0963261	1	no
Triacylglyceride 16:1_36:1	0.00993442	0.913158	1	-0.017887	0.844323	1	no
Triacylglyceride 16:1_36:2	0.00835221	0.926947	1	-0.0187888	0.836581	1	no
Triacylglyceride 16:1_36:3	-0.0538012	0.554507	1	-0.0862541	0.342821	1	no
Triacylglyceride 16:1_36:4	-0.116272	0.200298	1	-0.144375	0.111113	1	no
Triacylglyceride 16:1_36:5	-0.0895359	0.324702	1	-0.118096	0.193281	1	no
Triacylglyceride 16:1_38:3	-0.0134127	0.882941	1	-0.0515369	0.571317	1	no
Triacylglyceride 16:1_38:4	-0.087519	0.335763	1	-0.106796	0.239714	1	no
Triacylglyceride 16:1_38:5	-0.139122	0.124868	1	-0.168401	0.0626157	1	no
Triacylglyceride 17:0_32:1	-0.201956	0.0250864	1	-0.207688	0.0211641	1	no
Triacylglyceride 17:0_34:1	-0.064759	0.476696	1	-0.0786096	0.387446	1	no
Triacylglyceride 17:0_34:2	-0.109896	0.226268	1	-0.121533	0.180546	1	no
Triacylglyceride 17:0_34:3	-0.0813314	0.371171	1	-0.0919731	0.311652	1	no
Triacylglyceride 17:0_36:3	-0.0710393	0.434916	1	-0.0904821	0.319594	1	no
Triacylglyceride 17:0_36:4	-0.104261	0.251118	1	-0.119074	0.189594	1	no
Triacylglyceride 17:1_32:1	-0.14851	0.101142	1	-0.157682	0.0815365	1	no
Triacylglyceride 17:1_34:1	-0.0480311	0.597807	1	-0.0602411	0.508045	1	no
Triacylglyceride 17:1_34:2	-0.0890791	0.327186	1	-0.108305	0.2331	1	no
Triacylglyceride 17:1_34:3	-0.0746238	0.412038	1	-0.0881663	0.332187	1	no
Triacylglyceride 17:1_36:3	-0.0486359	0.593199	1	-0.0763115	0.401515	1	no
Triacylglyceride 17:1_36:4	-0.0622102	0.494252	1	-0.0872412	0.337305	1	no
Triacylglyceride 17:1_36:5	0.0182239	0.841429	1	-0.0120333	0.894907	1	no
Triacylglyceride 17:2_34:2	0.0081926	0.92834	1	-0.0169173	0.852665	1	no
Triacylglyceride 17:2_34:3	-0.0478348	0.599307	1	-0.0672007	0.4602	1	no
Triacylglyceride 17:2_36:2	0.0588848	0.517659	1	0.0294077	0.746781	1	no
Triacylglyceride 17:2_36:3	0.0637468	0.483627	1	0.0389788	0.668618	1	no
Triacylglyceride 17:2_36:4	0.13654	0.132091	1	0.0977569	0.282068	1	no
Triacylglyceride 17:2_38:5	0.166389	0.0658639	1	0.149947	0.0978454	1	no
Triacylglyceride 17:2_38:6	0.192741	0.0326919	1	0.178406	0.0483492	1	no
Triacylglyceride 17:2_38:7	-0.10963	0.227398	1	-0.116	0.20136	1	no
Triacylglyceride 18:0_30:0	-0.00383165	0.96645	1	-0.0074689	0.934655	1	no
Triacylglyceride 18:0_30:1	-0.0346997	0.703185	1	-0.0384009	0.673248	1	no
Triacylglyceride 18:0_32:0	0.0341034	0.708053	1	0.0350482	0.700347	1	no
Triacylglyceride 18:0_32:1	-0.0694786	0.445099	1	-0.0822417	0.365823	1	no
Triacylglyceride 18:0_32:2	-0.141872	0.117514	1	-0.158213	0.0805033	1	no
Triacylglyceride 18:0_34:2	-0.0163805	0.85729	1	-0.0387027	0.670829	1	no
Triacylglyceride 18:0_34:3	-0.0649299	0.475531	1	-0.0832114	0.360179	1	no
Triacylglyceride 18:0_36:1	-0.184897	0.0406232	1	-0.184216	0.0413823	1	no
Triacylglyceride 18:0_36:2	0.082468	0.364501	1	0.0565871	0.534157	1	no
Triacylglyceride 18:0_36:3	0.0540417	0.552736	1	0.0259435	0.775768	1	no
Triacylglyceride 18:0_36:4	0.00918857	0.919655	1	-0.0177356	0.845625	1	no
Triacylglyceride 18:0_36:5	0.0174791	0.84783	1	-0.00109185	0.990437	1	no
Triacylglyceride 18:0_38:6	-0.0170329	0.851669	1	-0.0578145	0.525312	1	no
Triacylglyceride 18:0_38:7	0.110085	0.225466	1	0.0793077	0.383231	1	no
Triacylglyceride 18:1_26:0	-0.0698812	0.44246	1	-0.0546575	0.548212	1	no
Triacylglyceride 18:1_28:1	-0.100337	0.269497	1	-0.0926391	0.308146	1	no
Triacylglyceride 18:1_30:0	-0.0397928	0.662118	1	-0.0471719	0.604383	1	no
Triacylglyceride 18:1_30:1	-0.0386862	0.670961	1	-0.0423401	0.64194	1	no
Triacylglyceride 18:1_30:2	-0.0341119	0.707984	1	-0.0312879	0.731192	1	no
Triacylglyceride 18:1_31:0	-0.139619	0.123514	1	-0.145441	0.108473	1	no
Triacylglyceride 18:1_32:0	0.0145755	0.872874	1	7.05749e-05	0.999382	1	no
Triacylglyceride 18:1_32:1	-0.0209905	0.817746	1	-0.0379905	0.676544	1	no
Triacylglyceride 18:1_32:2	-0.0822507	0.36577	1	-0.100302	0.269668	1	no
Triacylglyceride 18:1_32:3	-0.0521539	0.566713	1	-0.0639985	0.481899	1	no
Triacylglyceride 18:1_33:0	-0.0308878	0.7345	1	-0.0399836	0.660598	1	no
Triacylglyceride 18:1_33:1	-0.0117994	0.896938	1	-0.0222165	0.807303	1	no
Triacylglyceride 18:1_33:2	-0.0859008	0.344809	1	-0.0973966	0.283854	1	no
Triacylglyceride 18:1_33:3	-0.0836156	0.357842	1	-0.0982809	0.279484	1	no
Triacylglyceride 18:1_34:1	0.0519494	0.568237	1	0.0273491	0.763967	1	no
Triacylglyceride 18:1_34:2	-0.0152204	0.8673	1	-0.0455099	0.617192	1	no
Triacylglyceride 18:1_34:3	-0.0432198	0.635031	1	-0.0685579	0.451169	1	no
Triacylglyceride 18:1_34:4	-0.0676978	0.456881	1	-0.0904618	0.319703	1	no
Triacylglyceride 18:1_35:2	-0.0891202	0.326962	1	-0.107416	0.236983	1	no
Triacylglyceride 18:1_35:3	-0.08849	0.330408	1	-0.110644	0.223105	1	no
Triacylglyceride 18:1_36:0	-0.00793865	0.930555	1	-0.0271848	0.765343	1	no
Triacylglyceride 18:1_36:1	0.0967701	0.286977	1	0.0696276	0.444122	1	no
Triacylglyceride 18:1_36:2	0.0912314	0.315586	1	0.0669624	0.461796	1	no
Triacylglyceride 18:1_36:3	0.0415417	0.648237	1	0.0128349	0.88795	1	no
Triacylglyceride 18:1_36:4	-0.0221312	0.808028	1	-0.0439125	0.629612	1	no
Triacylglyceride 18:1_36:5	-0.00955738	0.916442	1	-0.0284001	0.755178	1	no
Triacylglyceride 18:1_36:6	0.00703114	0.938477	1	-0.0150451	0.868815	1	no
Triacylglyceride 18:1_38:5	-0.0441811	0.627516	1	-0.0821281	0.366488	1	no
Triacylglyceride 18:1_38:6	0.0512709	0.573308	1	-0.00366525	0.967906	1	no
Triacylglyceride 18:1_38:7	0.161832	0.0737301	1	0.12165	0.180126	1	no
Triacylglyceride 18:2_28:0	-0.0778519	0.392051	1	-0.0734483	0.419462	1	no
Triacylglyceride 18:2_30:0	-0.0965175	0.288244	1	-0.104875	0.248323	1	no
Triacylglyceride 18:2_30:1	-0.0814045	0.37074	1	-0.085005	0.349882	1	no
Triacylglyceride 18:2_31:0	-0.276256	0.00198168	0.984893	-0.272023	0.00233702	1	no
Triacylglyceride 18:2_32:0	-0.0434424	0.633287	1	-0.0613763	0.500068	1	no
Triacylglyceride 18:2_32:1	-0.11707	0.197207	1	-0.136161	0.13318	1	no
Triacylglyceride 18:2_32:2	-0.165456	0.0674173	1	-0.181652	0.0443457	1	no
Triacylglyceride 18:2_33:0	-0.0895671	0.324532	1	-0.10168	0.263108	1	no
Triacylglyceride 18:2_33:1	-0.0906985	0.318433	1	-0.104234	0.251243	1	no
Triacylglyceride 18:2_33:2	-0.139354	0.124235	1	-0.160201	0.0767233	1	no
Triacylglyceride 18:2_34:0	-0.0221311	0.808029	1	-0.0478287	0.599353	1	no
Triacylglyceride 18:2_34:1	-0.0358246	0.694036	1	-0.0646005	0.477778	1	no
Triacylglyceride 18:2_34:2	-0.101613	0.263423	1	-0.127673	0.159346	1	no
Triacylglyceride 18:2_34:3	-0.111138	0.221031	1	-0.135465	0.135193	1	no
Triacylglyceride 18:2_34:4	-0.148464	0.101249	1	-0.168814	0.0619664	1	no
Triacylglyceride 18:2_35:1	-0.0864501	0.341721	1	-0.105953	0.243466	1	no
Triacylglyceride 18:2_35:2	-0.167631	0.0638434	1	-0.18585	0.0395807	1	no
Triacylglyceride 18:2_35:3	-0.171727	0.057534	1	-0.191896	0.0334778	1	no
Triacylglyceride 18:2_36:0	-0.00153752	0.986534	1	-0.02852	0.754177	1	no
Triacylglyceride 18:2_36:1	0.0414285	0.649132	1	0.0105399	0.907888	1	no
Triacylglyceride 18:2_36:2	0.0344769	0.705003	1	0.00408518	0.964231	1	no
Triacylglyceride 18:2_36:3	-0.0273348	0.764086	1	-0.0511312	0.574355	1	no
Triacylglyceride 18:2_36:4	-0.0581917	0.522608	1	-0.0763468	0.401297	1	no
Triacylglyceride 18:2_36:5	-0.046555	0.609123	1	-0.0620101	0.495644	1	no
Triacylglyceride 18:2_38:4	-0.159108	0.0787826	1	-0.184308	0.0412782	1	no
Triacylglyceride 18:2_38:5	-0.11396	0.209455	1	-0.147955	0.102437	1	no
Triacylglyceride 18:2_38:6	-0.0151426	0.867972	1	-0.0665223	0.464751	1	no
Triacylglyceride 18:3_30:0	-0.14497	0.109633	1	-0.149885	0.0979863	1	no
Triacylglyceride 18:3_32:0	-0.0568169	0.532496	1	-0.0658956	0.468978	1	no
Triacylglyceride 18:3_32:1	-0.120497	0.184318	1	-0.129892	0.152163	1	no
Triacylglyceride 18:3_34:0	-0.0528341	0.561658	1	-0.0666805	0.463688	1	no
Triacylglyceride 18:3_34:1	-0.0693331	0.446056	1	-0.0848682	0.350661	1	no
Triacylglyceride 18:3_34:2	-0.119963	0.186286	1	-0.134842	0.137014	1	no
Triacylglyceride 18:3_34:3	-0.141465	0.118578	1	-0.151686	0.0939724	1	no
Triacylglyceride 18:3_35:2	-0.0582741	0.522019	1	-0.0699385	0.442085	1	no
Triacylglyceride 18:3_36:1	0.0329042	0.717878	1	0.0132147	0.884657	1	no
Triacylglyceride 18:3_36:2	0.00503411	0.95593	1	-0.0113211	0.901094	1	no
Triacylglyceride 18:3_36:3	-0.0315958	0.728649	1	-0.0491979	0.58893	1	no
Triacylglyceride 18:3_36:4	-0.096563	0.288015	1	-0.108106	0.233965	1	no
Triacylglyceride 18:3_38:5	-0.0750345	0.409463	1	-0.109341	0.228634	1	no
Triacylglyceride 18:3_38:6	0.112924	0.213652	1	0.0609081	0.50335	1	no
Triacylglyceride 20:0_32:3	-0.0165022	0.856241	1	-0.0453261	0.618615	1	no
Triacylglyceride 20:0_32:4	-0.13584	0.134105	1	-0.153532	0.089993	1	no
Triacylglyceride 20:0_34:1	-0.137581	0.129143	1	-0.155028	0.0868689	1	no
Triacylglyceride 20:1_32:1	-0.0942345	0.299853	1	-0.108306	0.233096	1	no
Triacylglyceride 20:1_32:2	-0.0476386	0.600807	1	-0.0641612	0.480783	1	no
Triacylglyceride 20:1_32:3	0.0944099	0.29895	1	0.0773784	0.394946	1	no
Triacylglyceride 20:1_34:0	-0.0998018	0.272074	1	-0.116617	0.198957	1	no
Triacylglyceride 20:1_34:1	0.107841	0.235122	1	0.0769463	0.397599	1	no
Triacylglyceride 20:1_34:2	0.00353451	0.96905	1	-0.0195167	0.830343	1	no
Triacylglyceride 20:1_34:3	0.0193528	0.831747	1	0.000554362	0.995145	1	no
Triacylglyceride 20:2_32:0	0.139413	0.124072	1	0.126062	0.164722	1	no
Triacylglyceride 20:2_32:1	-0.0163964	0.857152	1	-0.0365295	0.688325	1	no
Triacylglyceride 20:2_34:1	-0.013506	0.882133	1	-0.0398328	0.661799	1	no
Triacylglyceride 20:2_34:2	-0.0730261	0.422147	1	-0.102477	0.259366	1	no
Triacylglyceride 20:2_34:3	-0.0222404	0.807099	1	-0.0542927	0.55089	1	no
Triacylglyceride 20:2_34:4	-0.0674394	0.458605	1	-0.0725321	0.425301	1	no
Triacylglyceride 20:2_36:5	0.115382	0.20379	1	0.092677	0.307947	1	no
Triacylglyceride 20:3_32:0	-0.115616	0.202868	1	-0.131089	0.148387	1	no
Triacylglyceride 20:3_32:1	-0.116281	0.200265	1	-0.129012	0.154981	1	no
Triacylglyceride 20:3_32:2	-0.168173	0.0629768	1	-0.191721	0.0336431	1	no
Triacylglyceride 20:3_34:0	-0.101765	0.262707	1	-0.1153	0.204114	1	no
Triacylglyceride 20:3_34:1	-0.09299	0.306309	1	-0.116659	0.198794	1	no
Triacylglyceride 20:3_34:2	-0.131126	0.148273	1	-0.155516	0.0858682	1	no
Triacylglyceride 20:3_34:3	-0.144835	0.109967	1	-0.170874	0.0588042	1	no
Triacylglyceride 20:3_36:3	-0.126629	0.162813	1	-0.152824	0.0915038	1	no
Triacylglyceride 20:3_36:4	-0.107473	0.236732	1	-0.131766	0.146285	1	no
Triacylglyceride 20:3_36:5	0.0716785	0.430784	1	0.0363876	0.689473	1	no
Triacylglyceride 20:4_30:0	-0.141533	0.1184	1	-0.151029	0.0954202	1	no
Triacylglyceride 20:4_32:0	-0.114996	0.205316	1	-0.13161	0.146769	1	no
Triacylglyceride 20:4_32:1	-0.14195	0.117309	1	-0.161545	0.0742506	1	no
Triacylglyceride 20:4_32:2	-0.190102	0.0351995	1	-0.20425	0.0234479	1	no
Triacylglyceride 20:4_33:2	-0.0410192	0.652372	1	-0.0723266	0.426618	1	no
Triacylglyceride 20:4_34:0	-0.0641825	0.480637	1	-0.0924897	0.30893	1	no
Triacylglyceride 20:4_34:1	-0.0862631	0.342771	1	-0.113782	0.210173	1	no
Triacylglyceride 20:4_34:2	-0.179437	0.0470462	1	-0.208966	0.0203653	1	no
Triacylglyceride 20:4_34:3	-0.228497	0.0110219	1	-0.253893	0.00460208	1	no
Triacylglyceride 20:4_35:3	-0.0365443	0.688205	1	-0.0645313	0.478251	1	no
Triacylglyceride 20:4_36:2	-0.102226	0.260538	1	-0.141893	0.117458	1	no
Triacylglyceride 20:4_36:3	-0.183824	0.0418233	1	-0.211443	0.0188905	1	no
Triacylglyceride 20:4_36:4	-0.157079	0.0827253	1	-0.176824	0.0504071	1	no
Triacylglyceride 20:4_36:5	-0.182526	0.0433156	1	-0.204813	0.0230598	1	no
Triacylglyceride 20:5_34:0	0.106253	0.242126	1	0.0635645	0.484882	1	no
Triacylglyceride 20:5_34:1	0.0695676	0.444515	1	0.0298274	0.743292	1	no
Triacylglyceride 20:5_34:2	0.0525704	0.563615	1	0.00838854	0.92663	1	no
Triacylglyceride 20:5_36:2	0.107686	0.235798	1	0.0662624	0.466501	1	no
Triacylglyceride 20:5_36:3	0.0680314	0.454661	1	0.0362254	0.690787	1	no
Triacylglyceride 22:2_32:4	-0.294212	0.0009563	0.475281	-0.279137	0.00176866	0.879022	no
Triacylglyceride 22:4_32:0	-0.11675	0.198444	1	-0.137345	0.129808	1	no
Triacylglyceride 22:4_32:2	0.00650009	0.943116	1	-0.0149875	0.869313	1	no
Triacylglyceride 22:4_34:2	-0.187939	0.0373748	1	-0.205292	0.0227346	1	no
Triacylglyceride 22:5_32:0	-0.100139	0.27045	1	-0.129389	0.153768	1	no
Triacylglyceride 22:5_32:1	-0.0955952	0.292897	1	-0.125306	0.167288	1	no
Triacylglyceride 22:5_34:1	-0.0770862	0.396739	1	-0.110166	0.225123	1	no
Triacylglyceride 22:5_34:2	-0.12852	0.156576	1	-0.168449	0.0625407	1	no
Triacylglyceride 22:5_34:3	-0.0607198	0.504673	1	-0.096048	0.290606	1	no
Triacylglyceride 22:6_32:0	0.0912877	0.315287	1	0.0394964	0.664483	1	no
Triacylglyceride 22:6_32:1	0.0523159	0.565507	1	-0.000950756	0.991673	1	no
Triacylglyceride 22:6_34:1	0.113205	0.21251	1	0.0548341	0.546919	1	no
Triacylglyceride 22:6_34:2	0.0676987	0.456875	1	0.00655126	0.942669	1	no
Triacylglyceride 22:6_34:3	0.0994967	0.27355	1	0.0428431	0.637985	1	no

## Sheet: White women
Metabolite	Pearson correlation coefficient (R) (log2 concentration with age)	p-value (log2 concentration with age)	q-value (log2 concentration with age)	Pearson correlation coefficient (R2) (log2 concentration with age^2)	p-value (log2 concentration with age^2)	q-value (log2 concentration with age^2)	Significant association
Alanine	0.349103	1.69051e-07	8.40185e-05	0.328618	9.35721e-07	0.000465053	linear
Arginine	0.21391	0.0016897	0.839782	0.217217	0.00142422	0.707839	no
Asparagine	0.103643	0.131608	1	0.109619	0.110661	1	no
Aspartic Acid	0.31845	2.09156e-06	0.0010395	0.310784	3.76264e-06	0.00187003	linear
Cysteine	0.597431	5.38371e-22	2.6757e-19	0.605877	9.89051e-23	4.91558e-20	non-linear
Glutamine	0.46515	7.82723e-13	3.89013e-10	0.456939	2.19578e-12	1.0913e-09	linear
Glutamic Acid	0.205414	0.00259131	1	0.209373	0.00212748	1	no
Glycine	0.275409	4.60348e-05	0.0228793	0.247501	0.000264481	0.131447	linear
Histidine	0.0228701	0.739996	1	0.0316487	0.646023	1	no
Isoleucine	0.022109	0.748354	1	0.0274583	0.690293	1	no
Leucine	0.0428112	0.534325	1	0.0380003	0.581269	1	no
Lysine	0.318377	2.10348e-06	0.00104543	0.316286	2.47278e-06	0.00122897	linear
Methionine	0.237879	0.000462302	0.229764	0.253124	0.000188859	0.0938628	no
Phenylalanine	0.350888	1.4478e-07	7.19555e-05	0.354979	1.01129e-07	5.02609e-05	non-linear
Proline	0.325404	1.21044e-06	0.000601589	0.331242	7.56673e-07	0.000376066	non-linear
Serine	-0.139033	0.0426591	1	-0.151369	0.0271814	1	no
Threonine	-0.0389901	0.571456	1	-0.0178203	0.795968	1	no
Tryptophan	0.0348105	0.613414	1	0.0376131	0.585129	1	no
Tyrosine	0.497574	1.00699e-14	5.00472e-12	0.48476	5.94389e-14	2.95412e-11	linear
Valine	0.111787	0.103742	1	0.111349	0.10511	1	no
Cholic acid	0.1858	0.00653943	1	0.208142	0.00226285	1	no
Chenodeoxycholic acid	0.137426	0.0451365	1	0.162099	0.0179082	1	no
Deoxycholic acid	0.248829	0.000244421	0.121477	0.251557	0.000207597	0.103176	no
Glycocholic acid	0.140521	0.0404679	1	0.158734	0.0204637	1	no
Glycochenodeoxycholic acid	0.0136535	0.842964	1	0.0256282	0.709973	1	no
Glycodeoxycholic acid	0.0994472	0.148056	1	0.109707	0.110373	1	no
Glycolithocholic acid	0.209638	0.0020993	1	0.200804	0.00324597	1	no
Glycolithocholic acid sulfate	0.0736635	0.284524	1	0.0562787	0.413829	1	no
Glycoursodeoxycholic acid	0.163744	0.0167625	1	0.162047	0.0179449	1	no
Taurocholic acid	0.144382	0.0352195	1	0.162907	0.0173369	1	no
Taurochenodeoxycholic acid	0.0384376	0.576924	1	0.0646924	0.347431	1	no
Taurodeoxycholic acid	0.0411962	0.54987	1	0.0612363	0.373847	1	no
Tauro-muricholic acids	-0.219194	0.00128436	0.638325	-0.19664	0.00396206	1	no
gamma-Amino butyric acid	0.374447	1.70817e-08	8.4896e-06	0.374519	1.69667e-08	8.43245e-06	non-linear
Putrescine	0.360417	6.2267e-08	3.09467e-05	0.362004	5.39602e-08	2.68182e-05	non-linear
Serotonin	0.0431457	0.531133	1	0.0559381	0.416664	1	no
beta-Alanine	0.116477	0.0899416	1	0.132106	0.0542146	1	no
Arachidonic acid (AA, omega-6-FA(20:4))	-0.286201	2.22076e-05	0.0110372	-0.268637	7.16358e-05	0.035603	linear
Docosahexaenoic acid (DHA, omega-3-FA(22:6))	0.170443	0.0127331	1	0.170379	0.0127672	1	no
Eicosapentaenoic acid	0.173752	0.011077	1	0.166824	0.0147893	1	no
Octadecenoic acid	-0.0391428	0.569949	1	-0.0263856	0.701805	1	no
Octadecadienoic acid	-0.178516	0.00902703	1	-0.166684	0.0148745	1	no
Eicosenoic acid	-0.0399138	0.562369	1	-0.0266111	0.699379	1	no
Eicosadienoic acid	-0.109787	0.110111	1	-0.0902485	0.189499	1	no
Eicosatrienoic acid	-0.137084	0.0456784	1	-0.11867	0.0840161	1	no
Aconitic acid	0.531444	6.34273e-17	3.15234e-14	0.517635	5.35982e-16	2.66383e-13	linear
Hippuric acid	0.330729	7.8887e-07	0.000392068	0.328092	9.76176e-07	0.00048516	linear
Lactic acid	0.132362	0.0537441	1	0.115473	0.0927672	1	no
Indoleacetic acid	0.0882537	0.199511	1	0.0784491	0.254308	1	no
Indolepropionic acid	0.0346312	0.615244	1	0.0186314	0.786899	1	no
Indoxyl sulfate	0.300107	8.29916e-06	0.00412468	0.285299	2.36312e-05	0.0117447	linear
1-Methylhistidine	0.333112	6.49647e-07	0.000322874	0.350756	1.46449e-07	7.27853e-05	non-linear
3-Methylhistidine	0.0592861	0.389283	1	0.0784741	0.254156	1	no
5-Aminovaleric acid	0.272688	5.50623e-05	0.027366	0.288039	1.9556e-05	0.00971932	non-linear
alpha-Aminobutyric acid	0.052479	0.446105	1	0.0476126	0.489448	1	no
Asymmetric dimethylarginine	0.551551	2.36967e-18	1.17772e-15	0.553351	1.74638e-18	8.6795e-16	non-linear
Betaine	0.0897083	0.192173	1	0.0701196	0.308396	1	no
Citrulline	0.616785	1.02785e-23	5.10843e-21	0.612048	2.77732e-23	1.38033e-20	linear
Creatinine	0.246488	0.000280787	0.139551	0.259215	0.000129992	0.0646058	no
Cystine	0.429767	5.5139e-11	2.74041e-08	0.43113	4.72242e-11	2.34704e-08	non-linear
Homoarginine	-0.188037	0.00590962	1	-0.192029	0.00491877	1	no
Homocysteine	0.59166	1.6655e-21	8.27753e-19	0.594399	9.77175e-22	4.85656e-19	non-linear
Kynurenine	0.425461	8.95609e-11	4.45118e-08	0.428273	6.53012e-11	3.24547e-08	non-linear
Methionine-Sulfoxide	0.362852	4.99696e-08	2.48349e-05	0.375575	1.5353e-08	7.63042e-06	non-linear
Ornithine	0.377015	1.33901e-08	6.65489e-06	0.361049	5.88221e-08	2.92346e-05	linear
Proline betaine	0.32724	1.04531e-06	0.000519521	0.32563	1.18882e-06	0.000590841	linear
Symmetric dimethylarginine	0.498333	9.04279e-15	4.49427e-12	0.499838	7.3015e-15	3.62884e-12	non-linear
Sarcosine	0.253664	0.000182772	0.0908378	0.245184	0.000303156	0.150669	no
Taurine	0.293385	1.34413e-05	0.00668031	0.289258	1.79658e-05	0.00892901	linear
Tryptophan betaine	-0.048542	0.481001	1	-0.0761264	0.268685	1	no
alpha-Aminoadipic acid	0.251177	0.000212407	0.105566	0.241165	0.000382989	0.190346	no
trans-4-Hydroxyproline	0.228602	0.000775704	0.385525	0.248892	0.000243514	0.121026	no
Trigonelline	0.212106	0.00185283	0.920858	0.185151	0.00673337	1	no
p-Cresol sulfate	0.281317	3.1004e-05	0.015409	0.276472	4.29043e-05	0.0213234	linear
Cortisol	0.0663614	0.335108	1	0.0842071	0.220988	1	no
Cortisone	-0.282204	2.9194e-05	0.0145094	-0.264837	9.13425e-05	0.0453972	linear
Dehydroepiandrosterone sulfate	-0.62412	2.13212e-24	1.05967e-21	-0.625044	1.7435e-24	8.6652e-22	non-linear
Hypoxanthine	0.118322	0.0849354	1	0.126624	0.065099	1	no
Choline	0.440103	1.67326e-11	8.31612e-09	0.445152	9.20729e-12	4.57602e-09	non-linear
Trimethylamine N-oxide	0.269992	6.56293e-05	0.0326177	0.245717	0.000293817	0.146027	linear
Carnitine	0.432236	4.16257e-11	2.0688e-08	0.414859	2.8726e-10	1.42768e-07	linear
Acetylcarnitine	0.199101	0.00352339	1	0.211012	0.00195864	0.973443	no
Propionylcarnitine	0.371945	2.16111e-08	1.07407e-05	0.361028	5.89369e-08	2.92916e-05	linear
Butyrylcarnitine	0.394691	2.36393e-09	1.17487e-06	0.387872	4.67172e-09	2.32185e-06	linear
Valerylcarnitine	0.297334	1.01403e-05	0.00503975	0.290432	1.65497e-05	0.00822522	linear
Decanoylcarnitine	0.293112	1.37042e-05	0.006811	0.274732	4.81401e-05	0.0239256	linear
Tetradecenoylcarnitine	0.268303	7.31924e-05	0.0363766	0.270838	6.21229e-05	0.0308751	non-linear
Octadecenoylcarnitine	0.160903	0.0187824	1	0.163735	0.0167686	1	no
Octadecadienoylcarnitine	0.23117	0.000673511	0.334735	0.22941	0.000742087	0.368817	no
Lysophosphatidylcholine 16:0	0.154541	0.0240864	1	0.142049	0.0383159	1	no
Lysophosphatidylcholine 16:1	0.272426	5.60141e-05	0.027839	0.269671	6.70055e-05	0.0333017	linear
Lysophosphatidylcholine 17:0	0.245427	0.000298873	0.14854	0.230651	0.000693097	0.344469	no
Lysophosphatidylcholine 18:0	0.223959	0.000997426	0.495721	0.1953	0.00422122	1	no
Lysophosphatidylcholine 18:1	0.130434	0.0573608	1	0.114431	0.0957714	1	no
Lysophosphatidylcholine 18:2	-0.0261455	0.704391	1	-0.0402507	0.559072	1	no
Lysophosphatidylcholine 20:3	0.0806076	0.241433	1	0.0696439	0.311697	1	no
Lysophosphatidylcholine 20:4	0.0596166	0.38664	1	0.042969	0.532818	1	no
Lysophosphatidylcholine 24:0	0.0359393	0.60195	1	0.0385039	0.576266	1	no
Lysophosphatidylcholine 26:0	-0.0299238	0.664106	1	-0.0163223	0.812789	1	no
Lysophosphatidylcholine 26:1	0.194555	0.00437175	1	0.202424	0.00300062	1	no
Phosphatidylcholine 24:0	-0.254181	0.000177124	0.0880308	-0.206491	0.00245685	1	no
Phosphatidylcholine 28:1	0.341586	3.21321e-07	0.000159696	0.260865	0.000117299	0.0582977	linear
Phosphatidylcholine 30:0	0.217172	0.00142758	0.709509	-0.227268	0.000834247	0.414621	no
Phosphatidylcholine 32:0	0.255662	0.000161816	0.0804226	0.323215	1.43992e-06	0.000715639	non-linear
Phosphatidylcholine 32:1	0.18176	0.00783096	1	0.222699	0.00106694	0.530268	no
Phosphatidylcholine 32:2	0.124462	0.0698581	1	0.265175	8.94004e-05	0.044432	non-linear
Phosphatidylcholine 32:3	0.232221	0.000635405	0.315796	0.191962	0.00493428	1	no
Phosphatidylcholine 34:1	0.145597	0.033691	1	0.126941	0.0644258	1	no
Phosphatidylcholine 34:2	-0.0929916	0.176339	1	0.212434	0.00182208	0.905574	no
Phosphatidylcholine 34:3	0.20429	0.00273887	1	0.142548	0.0376346	1	no
Phosphatidylcholine 34:4	0.0923779	0.179223	1	-0.0902808	0.18934	1	no
Phosphatidylcholine 36:0	0.183271	0.00732345	1	0.190877	0.00518825	1	no
Phosphatidylcholine 36:1	0.212123	0.00185121	0.920049	0.079126	0.25022	1	no
Phosphatidylcholine 36:2	0.125158	0.0682955	1	0.183373	0.00729038	1	no
Phosphatidylcholine 36:3	0.0397245	0.564226	1	0.185368	0.00666782	1	no
Phosphatidylcholine 36:4	-0.00863578	0.900289	1	0.0988172	0.150655	1	no
Phosphatidylcholine 36:5	0.281719	3.0171e-05	0.014995	0.027618	0.688585	1	linear
Phosphatidylcholine 36:6	0.273974	5.06079e-05	0.0251521	-0.017732	0.796957	1	linear
Phosphatidylcholine 38:0	0.343687	2.68976e-07	0.000133681	0.260056	0.000123369	0.0613146	linear
Phosphatidylcholine 38:1	0.0938353	0.172431	1	0.252731	0.000193411	0.0961252	no
Phosphatidylcholine 38:3	0.248931	0.000242951	0.120747	0.330931	7.76071e-07	0.000385707	non-linear
Phosphatidylcholine 38:4	0.174667	0.0106541	1	0.104555	0.12823	1	no
Phosphatidylcholine 38:5	0.256978	0.000149267	0.0741858	0.227255	0.000834811	0.414901	no
Phosphatidylcholine 38:6	0.293053	1.37617e-05	0.00683956	0.150346	0.02825	1	linear
Phosphatidylcholine 40:2	-0.0331732	0.63021	1	0.23136	0.000666494	0.331248	no
Phosphatidylcholine 40:3	0.196227	0.00404033	1	0.277177	4.09368e-05	0.0203456	non-linear
Phosphatidylcholine 40:4	0.0114052	0.868567	1	-0.0239987	0.727661	1	no
Phosphatidylcholine 40:5	0.279146	3.58888e-05	0.0178368	0.190742	0.00522068	1	linear
Phosphatidylcholine 40:6	0.480395	1.07033e-13	5.31953e-11	0.0095704	0.889563	1	linear
Phosphatidylcholine 42:0	0.290971	1.5936e-05	0.00792022	0.260726	0.000118324	0.058807	linear
Phosphatidylcholine 42:1	0.28743	2.03995e-05	0.0101385	0.461903	1.18089e-12	5.86901e-10	non-linear
Phosphatidylcholine 42:2	0.171349	0.0122594	1	0.286007	2.25065e-05	0.0111857	non-linear
Phosphatidylcholine 42:4	-0.0585315	0.395358	1	0.286962	2.10719e-05	0.0104727	non-linear
Phosphatidylcholine 42:5	0.0563064	0.413598	1	0.160579	0.0190259	1	no
Phosphatidylcholine 42:6	0.114756	0.094826	1	-0.0374226	0.587033	1	no
Phosphatidylcholine O-28:0	-0.239091	0.000431413	0.214412	0.0660104	0.337676	1	no
Phosphatidylcholine O-28:1	0.265803	8.58952e-05	0.0426899	0.12303	0.0731627	1	linear
Phosphatidylcholine O-30:0	0.132494	0.0535045	1	0.141448	0.0391501	1	no
Phosphatidylcholine O-30:1	-0.262549	0.00010555	0.0524585	-0.259821	0.000125188	0.0622184	no
Phosphatidylcholine O-30:2	0.350866	1.45049e-07	7.20895e-05	0.332467	6.84833e-07	0.000340362	linear
Phosphatidylcholine O-32:1	0.181223	0.0080185	1	0.187317	0.00610598	1	no
Phosphatidylcholine O-32:2	0.302581	6.92857e-06	0.0034435	0.288833	1.85052e-05	0.0091971	linear
Phosphatidylcholine O-34:0	0.23926	0.00042727	0.212353	0.246073	0.000287734	0.143004	no
Phosphatidylcholine O-34:1	0.215121	0.00158763	0.789054	0.217854	0.00137769	0.684709	no
Phosphatidylcholine O-34:2	0.0765264	0.26617	1	0.0750257	0.275688	1	no
Phosphatidylcholine O-34:3	-0.0961035	0.162243	1	-0.0950593	0.166876	1	no
Phosphatidylcholine O-36:0	0.0441081	0.522003	1	0.0448117	0.51538	1	no
Phosphatidylcholine O-36:1	0.182803	0.00747735	1	0.175997	0.0100647	1	no
Phosphatidylcholine O-36:2	0.167366	0.0144641	1	0.15456	0.0240687	1	no
Phosphatidylcholine O-36:3	0.0709961	0.302373	1	0.0648737	0.346079	1	no
Phosphatidylcholine O-36:4	-0.0142522	0.836174	1	-0.0265549	0.699983	1	no
Phosphatidylcholine O-36:5	0.112534	0.101439	1	0.0954191	0.165268	1	no
Phosphatidylcholine O-38:0	0.332453	6.85584e-07	0.000340735	0.297227	1.02191e-05	0.00507889	linear
Phosphatidylcholine O-38:1	0.137712	0.0446876	1	0.121135	0.0777301	1	no
Phosphatidylcholine O-38:2	0.0694089	0.313337	1	0.0673553	0.327904	1	no
Phosphatidylcholine O-38:3	0.031004	0.652758	1	0.0339365	0.622356	1	no
Phosphatidylcholine O-38:4	0.0472077	0.493154	1	0.0369619	0.591648	1	no
Phosphatidylcholine O-38:5	0.162364	0.0177191	1	0.138888	0.0428782	1	no
Phosphatidylcholine O-38:6	0.28981	1.72867e-05	0.00859148	0.266705	8.10924e-05	0.0403029	linear
Phosphatidylcholine O-40:1	0.157138	0.0217835	1	0.139534	0.0419105	1	no
Phosphatidylcholine O-40:2	0.241594	0.000373614	0.185686	0.235819	0.000519512	0.258198	no
Phosphatidylcholine O-40:3	0.114783	0.0947461	1	0.121909	0.075839	1	no
Phosphatidylcholine O-40:4	-0.0134764	0.844976	1	-0.0156441	0.820433	1	no
Phosphatidylcholine O-40:5	0.100031	0.145681	1	0.0902681	0.189403	1	no
Phosphatidylcholine O-40:6	0.36293	4.96161e-08	2.46592e-05	0.345265	2.35148e-07	0.000116868	linear
Phosphatidylcholine O-42:1	0.0517464	0.452488	1	0.073705	0.284252	1	no
Phosphatidylcholine O-42:2	0.209842	0.00207782	1	0.198127	0.00369139	1	no
Phosphatidylcholine O-42:3	0.107518	0.117706	1	0.109702	0.110388	1	no
Phosphatidylcholine O-42:4	0.0286105	0.678006	1	0.031851	0.643915	1	no
Phosphatidylcholine O-42:5	0.0726426	0.29127	1	0.0713247	0.300135	1	no
Phosphatidylcholine O-44:3	0.000784106	0.990923	1	0.0239711	0.727962	1	no
Phosphatidylcholine O-44:4	0.142708	0.0374184	1	0.149763	0.0288746	1	no
Phosphatidylcholine O-44:5	0.174381	0.0107848	1	0.169768	0.0130962	1	no
Phosphatidylcholine O-44:6	0.151503	0.027044	1	0.156108	0.022673	1	no
Sphingomyelin 33:1	0.383553	7.13481e-09	3.546e-06	0.361987	5.40436e-08	2.68596e-05	linear
Sphingomyelin 35:1	0.40039	1.3217e-09	6.56885e-07	0.377521	1.27605e-08	6.34195e-06	linear
Sphingomyelin 41:1	0.252436	0.000196885	0.0978518	0.210215	0.0020391	1	no
Sphingomyelin 41:2	0.372942	1.96831e-08	9.78251e-06	0.334429	5.83101e-07	0.000289801	linear
Sphingomyelin 43:1	0.304764	5.89988e-06	0.00293224	0.261835	0.000110391	0.0548644	linear
Sphingomyelin 34:1	0.39043	3.62481e-09	1.80153e-06	0.364602	4.26105e-08	2.11774e-05	linear
Sphingomyelin 34:2	0.420294	1.58856e-10	7.89512e-08	0.384181	6.71177e-09	3.33575e-06	linear
Sphingomyelin 36:1	0.299108	8.92264e-06	0.00443455	0.277427	4.02617e-05	0.0200101	linear
Sphingomyelin 36:2	0.30947	4.15438e-06	0.00206473	0.283124	2.7423e-05	0.0136292	linear
Sphingomyelin 38:3	0.279685	3.46127e-05	0.0172025	0.274219	4.97958e-05	0.0247485	linear
Sphingomyelin 42:1	0.191009	0.00515677	1	0.145578	0.0337149	1	no
Sphingomyelin 42:2	0.345539	2.29692e-07	0.000114157	0.317563	2.24055e-06	0.00111355	linear
Sphingomyelin 44:1	0.298081	9.60931e-06	0.00477582	0.273975	5.06045e-05	0.0251504	linear
Sphingomyelin 44:2	0.240812	0.000390859	0.194257	0.225813	0.000902725	0.448654	no
Hexose	0.0878564	0.20155	1	0.0902557	0.189464	1	no
Cholesteryl ester 14:0	0.235222	0.000537266	0.267021	0.208639	0.00220734	1	no
Cholesteryl ester 15:0	0.330776	7.85891e-07	0.000390588	0.297979	9.68057e-06	0.00481124	linear
Cholesteryl ester 16:0	0.192321	0.00485268	1	0.163572	0.0168793	1	no
Cholesteryl ester 16:1	0.165899	0.0153593	1	0.157163	0.0217618	1	no
Cholesteryl ester 17:0	0.289616	1.75224e-05	0.00870865	0.259832	0.000125106	0.0621778	linear
Cholesteryl ester 17:1	0.159696	0.0197026	1	0.144346	0.0352655	1	no
Cholesteryl ester 18:0	0.103908	0.13062	1	0.0651854	0.343762	1	no
Cholesteryl ester 18:1	0.0338311	0.623438	1	0.0116721	0.86552	1	no
Cholesteryl ester 18:2	0.0537916	0.434797	1	0.0236067	0.731938	1	no
Cholesteryl ester 18:3	0.165666	0.015506	1	0.136483	0.0466452	1	no
Cholesteryl ester 20:3	0.140697	0.0402148	1	0.111972	0.103166	1	no
Cholesteryl ester 20:4	0.136834	0.0460798	1	0.107585	0.117474	1	no
Cholesteryl ester 20:5	0.367623	3.22932e-08	1.60497e-05	0.33904	3.97882e-07	0.000197747	linear
Cholesteryl ester 22:5	0.241936	0.000366308	0.182055	0.208365	0.00223779	1	no
Cholesteryl ester 22:6	0.418736	1.8847e-10	9.36698e-08	0.389283	4.06277e-09	2.0192e-06	linear
Ceramide d16:1/18:0	0.0895523	0.192951	1	0.0997789	0.146702	1	no
Ceramide d16:1/20:0	0.363979	4.5101e-08	2.24152e-05	0.353199	1.18291e-07	5.87906e-05	linear
Ceramide d16:1/22:0	0.375726	1.51347e-08	7.52193e-06	0.355023	1.00735e-07	5.00655e-05	linear
Ceramide d16:1/23:0	0.375299	1.57595e-08	7.83248e-06	0.35962	6.68942e-08	3.32464e-05	linear
Ceramide d16:1/24:0	0.39284	2.84826e-09	1.41559e-06	0.360376	6.25022e-08	3.10636e-05	linear
Ceramide d18:1/14:0	0.116796	0.089059	1	0.114959	0.0942396	1	no
Ceramide d18:1/16:0	0.338265	4.24442e-07	0.000210947	0.333773	6.15366e-07	0.000305837	linear
Ceramide d18:1/18:0	0.320792	1.74231e-06	0.000865927	0.319205	1.97231e-06	0.000980239	linear
Ceramide d18:1/20:0-OH	0.0743833	0.279831	1	0.0963056	0.161357	1	no
Ceramide d18:1/20:0	0.386791	5.19728e-09	2.58305e-06	0.379081	1.0991e-08	5.46253e-06	linear
Ceramide d18:1/22:0	0.385486	5.90738e-09	2.93597e-06	0.356874	8.54918e-08	4.24894e-05	linear
Ceramide d18:1/23:0	0.449713	5.32162e-12	2.64484e-09	0.421499	1.39112e-10	6.91388e-08	linear
Ceramide d18:1/24:0	0.369627	2.68259e-08	1.33325e-05	0.329451	8.74876e-07	0.000434813	linear
Ceramide d18:1/24:1	0.539516	1.74018e-17	8.64872e-15	0.528615	9.89915e-17	4.91988e-14	linear
Ceramide d18:1/25:0	0.522431	2.58228e-16	1.28339e-13	0.49673	1.13454e-14	5.63864e-12	linear
Ceramide d18:1/26:0	0.390698	3.52932e-09	1.75407e-06	0.374606	1.6827e-08	8.36301e-06	linear
Ceramide d18:1/26:1	0.461423	1.2544e-12	6.23437e-10	0.439095	1.88284e-11	9.35773e-09	linear
Ceramide d18:2/16:0	0.360362	6.25794e-08	3.1102e-05	0.340942	3.39207e-07	0.000168586	linear
Ceramide d18:2/18:0	0.283488	2.67507e-05	0.0132951	0.281805	2.99955e-05	0.0149077	linear
Ceramide d18:2/20:0	0.322081	1.57469e-06	0.000782622	0.318108	2.14776e-06	0.00106744	linear
Ceramide d18:2/22:0	0.356306	8.99139e-08	4.46872e-05	0.325888	1.1646e-06	0.000578807	linear
Ceramide d18:2/23:0	0.41872	1.88802e-10	9.38347e-08	0.38916	4.11255e-09	2.04394e-06	linear
Ceramide d18:2/24:0	0.28983	1.72625e-05	0.00857944	0.25166	0.000206315	0.102538	linear
Ceramide d18:2/24:1	0.46201	1.16514e-12	5.79073e-10	0.445789	8.53284e-12	4.24082e-09	linear
Dihydroceramide d18:0/22:0	-0.35693	8.50633e-08	4.22765e-05	-0.329528	8.6949e-07	0.000432137	linear
Dihydroceramide d18:0/24:0	0.245162	0.000303559	0.150869	0.219168	0.00128612	0.639202	no
Dihydroceramide d18:0/24:1	0.294652	1.22849e-05	0.00610558	0.292457	1.43538e-05	0.00713384	linear
Diacylglyceride 16:0_18:1	0.114169	0.0965377	1	0.113369	0.0989117	1	no
Diacylglyceride 16:0_18:2	-0.0448622	0.514906	1	-0.0398648	0.562849	1	no
Diacylglyceride 16:1_18:2	0.197022	0.00389098	1	0.202866	0.00293665	1	no
Diacylglyceride 17:0_18:1	0.118236	0.0851614	1	0.134476	0.0499989	1	no
Diacylglyceride 18:1_18:1	0.141698	0.0388011	1	0.145882	0.0333412	1	no
Diacylglyceride 18:1_18:2	0.105928	0.123266	1	0.112087	0.10281	1	no
Diacylglyceride 18:2_18:2	0.00203862	0.976404	1	0.00529531	0.93876	1	no
Diacylglyceride 18:2_18:3	0.107082	0.11921	1	0.0974933	0.156227	1	no
Dihexosylceramide d18:1/14:0	0.220838	0.00117781	0.585369	0.221517	0.00113615	0.564668	no
Dihexosylceramide d18:1/16:0	0.190506	0.00527777	1	0.191274	0.00509399	1	no
Dihexosylceramide d18:1/18:0	0.322007	1.58385e-06	0.000787175	0.309827	4.04429e-06	0.00201001	linear
Dihexosylceramide d18:1/20:0	0.396398	1.98829e-09	9.88181e-07	0.3771	1.32829e-08	6.60161e-06	linear
Dihexosylceramide d18:1/22:0	0.392071	3.07676e-09	1.52915e-06	0.374084	1.7677e-08	8.78545e-06	linear
Dihexosylceramide d18:1/24:0	0.404218	8.88861e-10	4.41764e-07	0.382708	7.74614e-09	3.84983e-06	linear
Dihexosylceramide d18:1/24:1	0.316891	2.36003e-06	0.00117294	0.312754	3.24067e-06	0.00161061	linear
Trihexosylceramide d18:1/16:0	0.363201	4.84095e-08	2.40595e-05	0.34952	1.63056e-07	8.10388e-05	linear
Trihexosylceramide d18:1/18:0	0.267023	7.9458e-05	0.0394906	0.268264	7.33741e-05	0.0364669	non-linear
Trihexosylceramide d18:1/24:1	0.412729	3.61285e-10	1.79559e-07	0.406599	6.92749e-10	3.44296e-07	linear
Trihexosylceramide d18:1/26:1	0.110168	0.108873	1	0.107852	0.116561	1	no
Trihexosylceramide d18:1/20:0	-0.324451	1.30573e-06	0.000648949	-0.284553	2.48725e-05	0.0123616	linear
Trihexosylceramide d18:1/22:0	0.136618	0.0464269	1	0.116887	0.0888105	1	no
Hexosylceramide d16:1/22:0	0.170994	0.0124429	1	0.150161	0.0284465	1	no
Hexosylceramide d16:1/24:0	0.160172	0.0193353	1	0.140123	0.041044	1	no
Hexosylceramide d18:1/16:0	0.353373	1.16492e-07	5.78967e-05	0.334936	5.59293e-07	0.000277969	linear
Hexosylceramide d18:1/18:0	0.253938	0.000179759	0.0893402	0.252585	0.000195125	0.0969769	no
Hexosylceramide d18:1/18:1	0.3999	1.39e-09	6.90829e-07	0.388359	4.45193e-09	2.21261e-06	linear
Hexosylceramide d18:1/20:0	0.339613	3.79231e-07	0.000188478	0.32411	1.34151e-06	0.000666729	linear
Hexosylceramide d18:1/22:0	0.272245	5.66801e-05	0.02817	0.254135	0.000177621	0.0882775	linear
Hexosylceramide d18:1/23:0	0.312511	3.30111e-06	0.00164065	0.297013	1.03773e-05	0.00515753	linear
Hexosylceramide d18:1/24:0	0.306045	5.36605e-06	0.00266693	0.284113	2.56323e-05	0.0127393	linear
Hexosylceramide d18:1/24:1	0.402402	1.07364e-09	5.336e-07	0.394808	2.33594e-09	1.16096e-06	linear
Hexosylceramide d18:1/26:0	-0.030905	0.653795	1	-0.0312036	0.650669	1	no
Hexosylceramide d18:2/18:0	0.240958	0.000387591	0.192633	0.226863	0.000852785	0.423834	no
Hexosylceramide d18:2/22:0	0.347932	1.87047e-07	9.29622e-05	0.32029	1.8121e-06	0.000900615	linear
Hexosylceramide d18:2/23:0	0.253139	0.000188689	0.0937782	0.232621	0.00062144	0.308856	no
Hexosylceramide d18:2/24:0	0.359178	6.95998e-08	3.45911e-05	0.325471	1.20398e-06	0.000598378	linear
Triacylglyceride 14:0_32:2	0.146683	0.0323739	1	0.155334	0.0233619	1	no
Triacylglyceride 14:0_34:0	0.135372	0.0484783	1	0.147226	0.031732	1	no
Triacylglyceride 14:0_34:1	0.160848	0.0188235	1	0.166523	0.0149728	1	no
Triacylglyceride 14:0_34:2	0.183523	0.00724172	1	0.189509	0.00552512	1	no
Triacylglyceride 14:0_34:3	0.201356	0.00316031	1	0.205326	0.00260264	1	no
Triacylglyceride 14:0_35:1	0.143151	0.0368252	1	0.148182	0.0306283	1	no
Triacylglyceride 14:0_35:2	0.147878	0.0309761	1	0.158353	0.0207728	1	no
Triacylglyceride 14:0_36:1	0.191903	0.00494767	1	0.196921	0.00390958	1	no
Triacylglyceride 14:0_36:2	0.212214	0.00184266	0.915801	0.214725	0.00162037	0.805323	no
Triacylglyceride 14:0_36:3	0.173558	0.0111689	1	0.176598	0.00980799	1	no
Triacylglyceride 14:0_36:4	0.136906	0.0459639	1	0.136873	0.0460162	1	no
Triacylglyceride 14:0_38:4	0.138978	0.0427419	1	0.150167	0.0284406	1	no
Triacylglyceride 14:0_38:5	0.21838	0.00134033	0.666146	0.213647	0.00171256	0.851144	no
Triacylglyceride 16:0_28:1	0.0133374	0.846554	1	0.0205082	0.766025	1	no
Triacylglyceride 16:0_28:2	0.0522679	0.447939	1	0.0598723	0.384603	1	no
Triacylglyceride 16:0_30:2	0.11664	0.0894921	1	0.131448	0.0554341	1	no
Triacylglyceride 16:0_32:0	0.125002	0.0686439	1	0.129516	0.0591529	1	no
Triacylglyceride 16:0_32:1	0.149442	0.0292238	1	0.155376	0.0233238	1	no
Triacylglyceride 16:0_32:2	0.162477	0.0176387	1	0.169137	0.013444	1	no
Triacylglyceride 16:0_32:3	0.166388	0.0150561	1	0.171665	0.0120977	1	no
Triacylglyceride 16:0_33:1	0.181144	0.00804664	1	0.183946	0.00710631	1	no
Triacylglyceride 16:0_33:2	0.150029	0.0285876	1	0.159611	0.0197693	1	no
Triacylglyceride 16:0_34:0	0.162104	0.0179047	1	0.158716	0.0204786	1	no
Triacylglyceride 16:0_34:1	0.139619	0.041784	1	0.144767	0.0347281	1	no
Triacylglyceride 16:0_34:2	0.164431	0.016304	1	0.169768	0.0130961	1	no
Triacylglyceride 16:0_34:3	0.199082	0.00352664	1	0.204094	0.00276534	1	no
Triacylglyceride 16:0_34:4	0.204148	0.00275799	1	0.203956	0.00278402	1	no
Triacylglyceride 16:0_35:1	0.202753	0.00295276	1	0.204927	0.00265428	1	no
Triacylglyceride 16:0_35:2	0.192552	0.00480069	1	0.198767	0.00358028	1	no
Triacylglyceride 16:0_35:3	0.188564	0.00576938	1	0.196656	0.00395906	1	no
Triacylglyceride 16:0_36:2	0.197034	0.0038887	1	0.195088	0.00426354	1	no
Triacylglyceride 16:0_36:3	0.146565	0.0325151	1	0.145376	0.0339646	1	no
Triacylglyceride 16:0_36:4	0.105439	0.125017	1	0.100864	0.142337	1	no
Triacylglyceride 16:0_36:5	0.145262	0.0341072	1	0.13534	0.0485317	1	no
Triacylglyceride 16:0_36:6	0.226314	0.000878584	0.436656	0.211257	0.00193444	0.961416	no
Triacylglyceride 16:0_37:3	0.0245874	0.721254	1	0.0503044	0.4652	1	no
Triacylglyceride 16:0_38:1	0.0816946	0.235124	1	0.0808815	0.239832	1	no
Triacylglyceride 16:0_38:2	0.0895527	0.192949	1	0.104467	0.128552	1	no
Triacylglyceride 16:0_38:3	0.0911325	0.185182	1	0.105043	0.126448	1	no
Triacylglyceride 16:0_38:4	0.117588	0.0869002	1	0.122812	0.0736777	1	no
Triacylglyceride 16:0_38:5	0.162822	0.0173967	1	0.161584	0.0182803	1	no
Triacylglyceride 16:0_38:6	0.224382	0.000975071	0.48461	0.217161	0.0014284	0.709917	no
Triacylglyceride 16:0_38:7	0.240117	0.000406783	0.202171	0.230786	0.000687984	0.341928	no
Triacylglyceride 16:0_40:6	0.232597	0.000622268	0.309267	0.223123	0.0010431	0.518423	no
Triacylglyceride 16:0_40:7	0.24606	0.000287956	0.143114	0.235448	0.000530486	0.263651	no
Triacylglyceride 16:0_40:8	0.28491	2.42701e-05	0.0120623	0.275681	4.52153e-05	0.022472	linear
Triacylglyceride 16:1_28:0	-0.018828	0.784705	1	-0.00823869	0.904852	1	no
Triacylglyceride 16:1_30:1	0.127339	0.0635846	1	0.14107	0.0396834	1	no
Triacylglyceride 16:1_32:0	0.166085	0.0152434	1	0.171491	0.0121863	1	no
Triacylglyceride 16:1_32:1	0.204794	0.00267176	1	0.211741	0.0018875	0.938089	no
Triacylglyceride 16:1_32:2	0.247695	0.000261449	0.12994	0.252644	0.000194425	0.0966292	no
Triacylglyceride 16:1_33:1	0.214982	0.00159904	0.794722	0.228689	0.000772016	0.383692	no
Triacylglyceride 16:1_34:0	0.213394	0.00173489	0.86224	0.214718	0.00162093	0.805603	no
Triacylglyceride 16:1_34:1	0.222887	0.00105633	0.524997	0.228421	0.00078341	0.389355	no
Triacylglyceride 16:1_34:2	0.245191	0.000303039	0.150611	0.250223	0.00022491	0.11178	no
Triacylglyceride 16:1_34:3	0.264084	9.58053e-05	0.0476153	0.267922	7.50071e-05	0.0372785	non-linear
Triacylglyceride 16:1_36:1	0.267988	7.46878e-05	0.0371198	0.268028	7.4499e-05	0.037026	non-linear
Triacylglyceride 16:1_36:2	0.282432	2.87443e-05	0.0142859	0.281014	3.16441e-05	0.0157271	linear
Triacylglyceride 16:1_36:3	0.237469	0.000473204	0.235182	0.234979	0.000544671	0.270701	no
Triacylglyceride 16:1_36:4	0.208643	0.00220685	1	0.203746	0.00281287	1	no
Triacylglyceride 16:1_36:5	0.26999	6.56401e-05	0.0326231	0.25768	0.000142952	0.0710469	linear
Triacylglyceride 16:1_38:3	0.229182	0.000751459	0.373475	0.236747	0.000492976	0.245009	no
Triacylglyceride 16:1_38:4	0.180893	0.00813575	1	0.182136	0.00770164	1	no
Triacylglyceride 16:1_38:5	0.289617	1.75217e-05	0.00870827	0.287589	2.01759e-05	0.0100274	linear
Triacylglyceride 17:0_32:1	0.0913567	0.184099	1	0.100736	0.142848	1	no
Triacylglyceride 17:0_34:1	0.179598	0.00861096	1	0.183163	0.00735891	1	no
Triacylglyceride 17:0_34:2	0.164015	0.0165802	1	0.167933	0.0141307	1	no
Triacylglyceride 17:0_34:3	0.299701	8.54741e-06	0.00424806	0.298995	8.99565e-06	0.00447084	linear
Triacylglyceride 17:0_36:3	0.265798	8.59262e-05	0.0427053	0.259126	0.000130717	0.0649662	linear
Triacylglyceride 17:0_36:4	0.204478	0.00271369	1	0.193079	0.00468448	1	no
Triacylglyceride 17:1_32:1	0.152558	0.025984	1	0.155346	0.0233512	1	no
Triacylglyceride 17:1_34:1	0.231387	0.000665475	0.330741	0.234065	0.000573312	0.284936	no
Triacylglyceride 17:1_34:2	0.241365	0.000378593	0.188161	0.243589	0.000332774	0.165389	no
Triacylglyceride 17:1_34:3	0.286876	2.11966e-05	0.0105347	0.290179	1.6846e-05	0.00837246	non-linear
Triacylglyceride 17:1_36:3	0.250962	0.000215168	0.106938	0.239615	0.000418671	0.20808	no
Triacylglyceride 17:1_36:4	0.264518	9.32098e-05	0.0463253	0.25066	0.000219103	0.108894	linear
Triacylglyceride 17:1_36:5	0.329913	8.42834e-07	0.000418888	0.3224	1.53561e-06	0.000763198	linear
Triacylglyceride 17:2_34:2	0.192289	0.0048599	1	0.179174	0.00877187	1	no
Triacylglyceride 17:2_34:3	0.0698508	0.310259	1	0.0867533	0.20729	1	no
Triacylglyceride 17:2_36:2	0.261717	0.000111213	0.0552726	0.258325	0.000137367	0.0682714	no
Triacylglyceride 17:2_36:3	0.256397	0.000154696	0.0768838	0.241791	0.000369376	0.18358	no
Triacylglyceride 17:2_36:4	0.16683	0.0147859	1	0.167047	0.0146546	1	no
Triacylglyceride 17:2_38:5	0.0853451	0.214788	1	0.0731354	0.288001	1	no
Triacylglyceride 17:2_38:6	0.217354	0.00141412	0.702816	0.20752	0.00233429	1	no
Triacylglyceride 17:2_38:7	-0.0265132	0.700432	1	-0.0095416	0.889894	1	no
Triacylglyceride 18:0_30:0	0.0382071	0.579212	1	0.0483046	0.483151	1	no
Triacylglyceride 18:0_30:1	-0.00518665	0.940014	1	0.0029458	0.965909	1	no
Triacylglyceride 18:0_32:0	0.119519	0.0818051	1	0.121842	0.0759996	1	no
Triacylglyceride 18:0_32:1	0.156885	0.0219988	1	0.161793	0.0181282	1	no
Triacylglyceride 18:0_32:2	0.137702	0.044703	1	0.14513	0.0342717	1	no
Triacylglyceride 18:0_34:2	0.198863	0.00356378	1	0.19909	0.00352515	1	no
Triacylglyceride 18:0_34:3	0.248654	0.000246985	0.122751	0.247089	0.000271001	0.134687	no
Triacylglyceride 18:0_36:1	-0.269586	6.73749e-05	0.0334853	-0.245743	0.000293377	0.145808	linear
Triacylglyceride 18:0_36:2	0.210696	0.00199022	0.989139	0.205884	0.00253179	1	no
Triacylglyceride 18:0_36:3	0.220554	0.0011956	0.594216	0.2109	0.00196977	0.978974	no
Triacylglyceride 18:0_36:4	0.194596	0.00436326	1	0.18068	0.00821223	1	no
Triacylglyceride 18:0_36:5	0.236428	0.00050196	0.249474	0.218557	0.00132801	0.660023	no
Triacylglyceride 18:0_38:6	0.270787	6.23285e-05	0.0309773	0.248131	0.000254773	0.126622	linear
Triacylglyceride 18:0_38:7	0.344363	2.53951e-07	0.000126214	0.334957	5.58288e-07	0.000277469	linear
Triacylglyceride 18:1_26:0	-0.0359893	0.601444	1	-0.0189464	0.783384	1	no
Triacylglyceride 18:1_28:1	0.119877	0.0808886	1	0.132102	0.0542208	1	no
Triacylglyceride 18:1_30:0	0.156591	0.0222521	1	0.162056	0.0179388	1	no
Triacylglyceride 18:1_30:1	0.170643	0.0126271	1	0.179363	0.00870015	1	no
Triacylglyceride 18:1_30:2	0.128169	0.0618642	1	0.139262	0.0423156	1	no
Triacylglyceride 18:1_31:0	0.0429433	0.533064	1	0.0542993	0.430468	1	no
Triacylglyceride 18:1_32:0	0.137088	0.0456731	1	0.142097	0.0382504	1	no
Triacylglyceride 18:1_32:1	0.214493	0.00163979	0.814976	0.220372	0.00120714	0.599947	no
Triacylglyceride 18:1_32:2	0.221647	0.00112836	0.560797	0.226673	0.000861614	0.428222	no
Triacylglyceride 18:1_32:3	0.226252	0.000881537	0.438124	0.226896	0.000851275	0.423083	no
Triacylglyceride 18:1_33:0	0.229689	0.00073082	0.363217	0.231038	0.000678445	0.337187	no
Triacylglyceride 18:1_33:1	0.251276	0.000211137	0.104935	0.256137	0.000157177	0.0781172	no
Triacylglyceride 18:1_33:2	0.199944	0.00338339	1	0.205923	0.0025269	1	no
Triacylglyceride 18:1_33:3	0.18222	0.00767301	1	0.178413	0.00906756	1	no
Triacylglyceride 18:1_34:1	0.20761	0.00232376	1	0.206149	0.00249883	1	no
Triacylglyceride 18:1_34:2	0.189521	0.00552207	1	0.188703	0.00573263	1	no
Triacylglyceride 18:1_34:3	0.235062	0.000542131	0.269439	0.229853	0.000724257	0.359956	no
Triacylglyceride 18:1_34:4	0.279437	3.51924e-05	0.0174906	0.268148	7.3923e-05	0.0367397	linear
Triacylglyceride 18:1_35:2	0.220053	0.00122764	0.610135	0.223645	0.00101434	0.504127	no
Triacylglyceride 18:1_35:3	0.256539	0.00015335	0.076215	0.262317	0.0001071	0.0532285	no
Triacylglyceride 18:1_36:0	0.0387949	0.573385	1	0.0365276	0.596013	1	no
Triacylglyceride 18:1_36:1	0.208544	0.00221781	1	0.203107	0.00290222	1	no
Triacylglyceride 18:1_36:2	0.186178	0.00642912	1	0.178121	0.00918323	1	no
Triacylglyceride 18:1_36:3	0.140581	0.0403811	1	0.132666	0.0531928	1	no
Triacylglyceride 18:1_36:4	0.117959	0.0859016	1	0.105287	0.125565	1	no
Triacylglyceride 18:1_36:5	0.174736	0.010623	1	0.155776	0.0229661	1	no
Triacylglyceride 18:1_36:6	0.268472	7.23971e-05	0.0359814	0.247706	0.000261284	0.129858	linear
Triacylglyceride 18:1_38:5	0.270899	6.18774e-05	0.0307531	0.251753	0.000205168	0.101968	linear
Triacylglyceride 18:1_38:6	0.319882	1.87081e-06	0.000929791	0.302713	6.86143e-06	0.00341013	linear
Triacylglyceride 18:1_38:7	0.358531	7.37466e-08	3.66521e-05	0.334977	5.57379e-07	0.000277017	linear
Triacylglyceride 18:2_28:0	0.0927659	0.177396	1	0.104289	0.129208	1	no
Triacylglyceride 18:2_30:0	0.128865	0.0604511	1	0.136608	0.0464432	1	no
Triacylglyceride 18:2_30:1	0.151093	0.0274663	1	0.158598	0.020574	1	no
Triacylglyceride 18:2_31:0	-0.264495	9.334e-05	0.04639	-0.230548	0.000697047	0.346432	linear
Triacylglyceride 18:2_32:0	0.110759	0.106978	1	0.116941	0.0886626	1	no
Triacylglyceride 18:2_32:1	0.190706	0.0052293	1	0.196772	0.0039373	1	no
Triacylglyceride 18:2_32:2	0.159935	0.0195177	1	0.163179	0.0171488	1	no
Triacylglyceride 18:2_33:0	0.175693	0.010197	1	0.180258	0.00836596	1	no
Triacylglyceride 18:2_33:1	0.216931	0.00144556	0.718443	0.222873	0.00105711	0.525382	no
Triacylglyceride 18:2_33:2	0.160679	0.0189503	1	0.164958	0.0159594	1	no
Triacylglyceride 18:2_34:0	0.175395	0.0103277	1	0.173083	0.0113957	1	no
Triacylglyceride 18:2_34:1	0.143657	0.0361575	1	0.14297	0.0370677	1	no
Triacylglyceride 18:2_34:2	0.130573	0.0570935	1	0.127419	0.063418	1	no
Triacylglyceride 18:2_34:3	0.173728	0.0110885	1	0.166019	0.0152845	1	no
Triacylglyceride 18:2_34:4	0.198254	0.00366913	1	0.186332	0.00638442	1	no
Triacylglyceride 18:2_35:1	0.229197	0.000750827	0.373161	0.222187	0.00109643	0.544927	no
Triacylglyceride 18:2_35:2	0.189184	0.00560804	1	0.191189	0.00511388	1	no
Triacylglyceride 18:2_35:3	0.131713	0.0549411	1	0.129384	0.0594148	1	no
Triacylglyceride 18:2_36:0	0.0905042	0.188243	1	0.0883896	0.198817	1	no
Triacylglyceride 18:2_36:1	0.195622	0.00415753	1	0.186369	0.00637394	1	no
Triacylglyceride 18:2_36:2	0.142104	0.0382412	1	0.132888	0.052792	1	no
Triacylglyceride 18:2_36:3	0.0915773	0.183037	1	0.079663	0.24701	1	no
Triacylglyceride 18:2_36:4	0.0932595	0.175091	1	0.078627	0.25323	1	no
Triacylglyceride 18:2_36:5	0.126294	0.0658084	1	0.106808	0.120162	1	no
Triacylglyceride 18:2_38:4	0.119176	0.0826925	1	0.1112	0.10558	1	no
Triacylglyceride 18:2_38:5	0.216651	0.00146677	0.728983	0.19866	0.00359855	1	no
Triacylglyceride 18:2_38:6	0.261694	0.000111371	0.0553512	0.245719	0.00029378	0.146009	no
Triacylglyceride 18:3_30:0	0.156778	0.0220904	1	0.159465	0.0198835	1	no
Triacylglyceride 18:3_32:0	0.151753	0.0267897	1	0.151239	0.0273157	1	no
Triacylglyceride 18:3_32:1	0.224601	0.00096367	0.478944	0.218312	0.00134511	0.668519	no
Triacylglyceride 18:3_34:0	0.212304	0.00183418	0.911587	0.201893	0.00307908	1	no
Triacylglyceride 18:3_34:1	0.193266	0.00464375	1	0.182361	0.00762536	1	no
Triacylglyceride 18:3_34:2	0.18125	0.00800889	1	0.167778	0.0142208	1	no
Triacylglyceride 18:3_34:3	0.216847	0.00145194	0.721614	0.202513	0.00298751	1	no
Triacylglyceride 18:3_35:2	0.243507	0.000334375	0.166184	0.238598	0.000443741	0.220539	no
Triacylglyceride 18:3_36:1	0.235261	0.000536116	0.26645	0.213962	0.00168519	0.837538	no
Triacylglyceride 18:3_36:2	0.190868	0.00519023	1	0.170521	0.0126914	1	no
Triacylglyceride 18:3_36:3	0.158293	0.0208211	1	0.138027	0.0441962	1	no
Triacylglyceride 18:3_36:4	0.100241	0.144832	1	0.0788278	0.252016	1	no
Triacylglyceride 18:3_38:5	0.259555	0.000127277	0.0632569	0.236995	0.000486092	0.241588	no
Triacylglyceride 18:3_38:6	0.324813	1.26865e-06	0.000630517	0.295836	1.12901e-05	0.00561119	linear
Triacylglyceride 20:0_32:3	0.165915	0.0153496	1	0.169389	0.0133041	1	no
Triacylglyceride 20:0_32:4	0.0892333	0.194548	1	0.08952	0.193112	1	no
Triacylglyceride 20:0_34:1	0.0121752	0.859781	1	0.0101062	0.883423	1	no
Triacylglyceride 20:1_32:1	0.121966	0.0756992	1	0.142135	0.0381988	1	no
Triacylglyceride 20:1_32:2	0.176615	0.00980067	1	0.180548	0.00825997	1	no
Triacylglyceride 20:1_32:3	0.172379	0.0117398	1	0.178114	0.00918575	1	no
Triacylglyceride 20:1_34:0	-0.122566	0.0742608	1	-0.106834	0.120073	1	no
Triacylglyceride 20:1_34:1	0.080397	0.242668	1	0.0976742	0.155457	1	no
Triacylglyceride 20:1_34:2	0.0778121	0.258197	1	0.0944509	0.16962	1	no
Triacylglyceride 20:1_34:3	0.18738	0.00608881	1	0.18605	0.00646632	1	no
Triacylglyceride 20:2_32:0	0.146719	0.0323317	1	0.142077	0.0382785	1	no
Triacylglyceride 20:2_32:1	0.188599	0.00576006	1	0.204029	0.00277409	1	no
Triacylglyceride 20:2_34:1	0.145086	0.0343269	1	0.153637	0.024936	1	no
Triacylglyceride 20:2_34:2	0.120867	0.078396	1	0.132707	0.0531177	1	no
Triacylglyceride 20:2_34:3	0.20971	0.00209172	1	0.2195	0.0012639	0.628159	no
Triacylglyceride 20:2_34:4	0.0336415	0.625386	1	0.0349205	0.612292	1	no
Triacylglyceride 20:2_36:5	-0.0578867	0.400593	1	-0.0546377	0.427597	1	no
Triacylglyceride 20:3_32:0	0.127147	0.0639891	1	0.13262	0.053276	1	no
Triacylglyceride 20:3_32:1	0.166508	0.0149821	1	0.179618	0.00860355	1	no
Triacylglyceride 20:3_32:2	0.204449	0.0027175	1	0.214503	0.00163899	0.814577	no
Triacylglyceride 20:3_34:0	0.166981	0.0146943	1	0.165402	0.015674	1	no
Triacylglyceride 20:3_34:1	0.162262	0.0177914	1	0.162124	0.0178898	1	no
Triacylglyceride 20:3_34:2	0.16969	0.0131387	1	0.168701	0.0136895	1	no
Triacylglyceride 20:3_34:3	0.243347	0.000337494	0.167734	0.237935	0.000460829	0.229032	no
Triacylglyceride 20:3_36:3	0.158999	0.0202519	1	0.151246	0.0273078	1	no
Triacylglyceride 20:3_36:4	0.138724	0.0431261	1	0.129676	0.0588382	1	no
Triacylglyceride 20:3_36:5	0.303641	6.40935e-06	0.00318545	0.274285	4.95808e-05	0.0246417	linear
Triacylglyceride 20:4_30:0	0.108848	0.113207	1	0.119828	0.081015	1	no
Triacylglyceride 20:4_32:0	0.149591	0.029061	1	0.148767	0.029969	1	no
Triacylglyceride 20:4_32:1	0.192367	0.00484223	1	0.192983	0.00470546	1	no
Triacylglyceride 20:4_32:2	0.170547	0.0126777	1	0.165541	0.015585	1	no
Triacylglyceride 20:4_33:2	0.126874	0.0645679	1	0.130369	0.0574858	1	no
Triacylglyceride 20:4_34:0	0.192299	0.00485757	1	0.188233	0.00585709	1	no
Triacylglyceride 20:4_34:1	0.200284	0.00332841	1	0.195015	0.00427819	1	no
Triacylglyceride 20:4_34:2	0.180889	0.00813728	1	0.173057	0.011408	1	no
Triacylglyceride 20:4_34:3	0.215073	0.00159159	0.791022	0.20484	0.00266567	1	no
Triacylglyceride 20:4_35:3	0.160583	0.0190232	1	0.146497	0.0325972	1	no
Triacylglyceride 20:4_36:2	0.263776	9.76888e-05	0.0485513	0.241551	0.000374553	0.186153	linear
Triacylglyceride 20:4_36:3	0.185076	0.00675587	1	0.16452	0.0162454	1	no
Triacylglyceride 20:4_36:4	0.173143	0.011367	1	0.149676	0.0289683	1	no
Triacylglyceride 20:4_36:5	0.178105	0.00918937	1	0.149716	0.0289257	1	no
Triacylglyceride 20:5_34:0	0.358749	7.2327e-08	3.59465e-05	0.341422	3.25769e-07	0.000161907	linear
Triacylglyceride 20:5_34:1	0.331707	7.28608e-07	0.000362118	0.313843	2.98265e-06	0.00148238	linear
Triacylglyceride 20:5_34:2	0.334267	5.90924e-07	0.000293689	0.31544	2.63913e-06	0.00131165	linear
Triacylglyceride 20:5_36:2	0.321093	1.70171e-06	0.000845751	0.292864	1.39469e-05	0.00693161	linear
Triacylglyceride 20:5_36:3	0.257897	0.00014105	0.0701019	0.234997	0.000544132	0.270434	no
Triacylglyceride 22:2_32:4	-0.221616	0.00113021	0.561712	-0.208531	0.00221928	1	no
Triacylglyceride 22:4_32:0	0.0490632	0.476298	1	0.0611598	0.374446	1	no
Triacylglyceride 22:4_32:2	0.136177	0.0471452	1	0.135553	0.0481752	1	no
Triacylglyceride 22:4_34:2	0.0497884	0.469797	1	0.0532108	0.439781	1	no
Triacylglyceride 22:5_32:0	0.193409	0.00461289	1	0.194896	0.00430226	1	no
Triacylglyceride 22:5_32:1	0.203205	0.00288833	1	0.207615	0.00232317	1	no
Triacylglyceride 22:5_34:1	0.235207	0.000537744	0.267259	0.225842	0.00090129	0.447941	no
Triacylglyceride 22:5_34:2	0.202164	0.00303873	1	0.19718	0.00386184	1	no
Triacylglyceride 22:5_34:3	0.26286	0.000103501	0.0514398	0.255214	0.000166313	0.0826578	no
Triacylglyceride 22:6_32:0	0.280979	3.1721e-05	0.0157653	0.279963	3.39697e-05	0.0168829	linear
Triacylglyceride 22:6_32:1	0.324635	1.28678e-06	0.000639532	0.320492	1.7838e-06	0.000886547	linear
Triacylglyceride 22:6_34:1	0.28803	1.95681e-05	0.00972536	0.278423	3.7669e-05	0.0187215	linear
Triacylglyceride 22:6_34:2	0.271375	5.99895e-05	0.0298148	0.264198	9.5113e-05	0.0472711	linear
Triacylglyceride 22:6_34:3	0.279892	3.41335e-05	0.0169644	0.271017	6.14036e-05	0.0305176	linear

## Sheet: White men
Metabolite	Pearson correlation coefficient (R) (log2 concentration with age)	p-value (log2 concentration with age)	q-value (log2 concentration with age)	Pearson correlation coefficient (R2) (log2 concentration with age^2)	p-value (log2 concentration with age^2)	q-value (log2 concentration with age^2)	Significant association
Alanine	0.126153	0.0714824	1	0.102481	0.143692	1	no
Arginine	0.155023	0.0264559	1	0.11481	0.101171	1	no
Asparagine	0.0686244	0.328224	1	0.0577544	0.410765	1	no
Aspartic Acid	0.132548	0.0581514	1	0.110525	0.114649	1	no
Cysteine	0.498904	2.66977e-14	1.3162e-11	0.479153	3.65404e-13	1.81606e-10	linear
Glutamine	0.261058	0.000156386	0.0708427	0.254979	0.000224611	0.111632	no
Glutamic Acid	-0.055973	0.425372	1	-0.092766	0.185855	1	no
Glycine	0.126744	0.0701548	1	0.137207	0.049788	1	no
Histidine	-0.05967	0.395393	1	-0.0723324	0.3027	1	no
Isoleucine	-0.0734664	0.295163	1	-0.0830842	0.236271	1	no
Leucine	-0.152609	0.0289267	1	-0.166891	0.0167707	1	no
Lysine	0.110053	0.116217	1	0.0824979	0.239605	1	no
Methionine	0.00213291	0.975786	1	-0.0280764	0.689441	1	no
Phenylalanine	0.242468	0.000460402	0.202116	0.221999	0.00137849	0.68511	no
Proline	0.0971791	0.165695	1	0.112498	0.108278	1	no
Serine	-0.177374	0.0109499	1	-0.171003	0.014226	1	no
Threonine	-0.0262419	0.708781	1	-0.0453447	0.518539	1	no
Tryptophan	-0.152163	0.0294044	1	-0.175904	0.0116402	1	no
Tyrosine	0.114743	0.101373	1	0.0794351	0.257561	1	no
Valine	-0.0809048	0.248833	1	-0.102007	0.145562	1	no
Cholic acid	0.0897241	0.200763	1	0.0980995	0.161705	1	no
Chenodeoxycholic acid	0.0818703	0.243212	1	0.0930875	0.184329	1	no
Deoxycholic acid	0.0872041	0.213755	1	0.100518	0.151563	1	no
Glycocholic acid	0.0321005	0.647731	1	0.0530682	0.449824	1	no
Glycochenodeoxycholic acid	0.0175556	0.802711	1	0.0463225	0.509552	1	no
Glycodeoxycholic acid	0.0113042	0.872198	1	0.0377079	0.591417	1	no
Glycolithocholic acid	0.169132	0.0153387	1	0.189198	0.00658937	1	no
Glycolithocholic acid sulfate	0.0860336	0.219989	1	0.0945272	0.177604	1	no
Glycoursodeoxycholic acid	0.0182275	0.795324	1	0.0331005	0.637528	1	no
Taurocholic acid	0.0657114	0.34922	1	0.0698037	0.31996	1	no
Taurochenodeoxycholic acid	-0.00132745	0.984929	1	0.0131615	0.851425	1	no
Taurodeoxycholic acid	-0.0635405	0.365405	1	-0.0535608	0.445623	1	no
Tauro-muricholic acids	-0.066636	0.342466	1	-0.0462389	0.510317	1	no
gamma-Amino butyric acid	0.216135	0.00185491	0.78277	0.228947	0.000960146	0.477193	no
Putrescine	0.239228	0.000551154	0.239752	0.24704	0.000355687	0.176777	no
Serotonin	-0.0765727	0.275162	1	-0.0704283	0.315639	1	no
beta-Alanine	-0.0566546	0.419748	1	-0.0424899	0.545235	1	no
Arachidonic acid (AA, omega-6-FA(20:4))	-0.192992	0.00556367	1	-0.179501	0.0100153	1	no
Docosahexaenoic acid (DHA, omega-3-FA(22:6))	0.14486	0.038233	1	0.12726	0.0690114	1	no
Eicosapentaenoic acid	0.0899373	0.199691	1	0.06559	0.350113	1	no
Octadecenoic acid	0.158889	0.022875	1	0.170628	0.0144435	1	no
Octadecadienoic acid	-0.0612397	0.383057	1	-0.0322995	0.645695	1	no
Eicosenoic acid	0.116544	0.0960865	1	0.130352	0.0624756	1	no
Eicosadienoic acid	0.117722	0.0927489	1	0.139953	0.0453458	1	no
Eicosatrienoic acid	-0.128656	0.0659954	1	-0.117415	0.093611	1	no
Aconitic acid	0.564859	1.12594e-18	5.57342e-16	0.573234	2.6539e-19	1.31899e-16	non-linear
Hippuric acid	0.443558	2.7237e-11	1.33189e-08	0.454258	7.85022e-12	3.90156e-09	non-linear
Lactic acid	-0.0826391	0.2388	1	-0.0536724	0.444674	1	no
Indoleacetic acid	0.0693513	0.323114	1	0.0676175	0.335388	1	no
Indolepropionic acid	0.0604753	0.389035	1	0.0745834	0.287862	1	no
Indoxyl sulfate	0.18916	0.00660022	1	0.189953	0.00637256	1	no
1-Methylhistidine	0.21495	0.00196773	0.826448	0.230686	0.000875579	0.435163	no
3-Methylhistidine	-0.0573798	0.413812	1	-0.0574195	0.413489	1	no
5-Aminovaleric acid	0.260284	0.000163847	0.0740586	0.277785	5.51599e-05	0.0274145	non-linear
alpha-Aminobutyric acid	-0.182838	0.0086907	1	-0.207721	0.00280264	1	no
Asymmetric dimethylarginine	0.461829	3.17015e-12	1.55337e-09	0.463154	2.69876e-12	1.34128e-09	non-linear
Betaine	0.0447853	0.523717	1	0.0619859	0.377276	1	no
Citrulline	0.543612	3.68579e-17	1.82078e-14	0.547709	1.91734e-17	9.52916e-15	non-linear
Creatinine	0.265855	0.000116795	0.0534923	0.271321	8.31819e-05	0.0413414	non-linear
Cystine	0.466348	1.82555e-12	8.96344e-10	0.445335	2.22187e-11	1.10427e-08	linear
Homoarginine	-0.121673	0.0822271	1	-0.144904	0.038174	1	no
Homocysteine	0.400578	2.65814e-09	1.2892e-06	0.417168	4.89496e-10	2.43279e-07	non-linear
Kynurenine	0.439987	4.08621e-11	1.99407e-08	0.445394	2.20685e-11	1.0968e-08	non-linear
Methionine-Sulfoxide	0.321989	2.50177e-06	0.00118084	0.307884	7.09405e-06	0.00352574	linear
Ornithine	0.190225	0.00629606	1	0.208822	0.00265769	1	no
Proline betaine	0.350117	2.66006e-07	0.000127151	0.348896	2.94537e-07	0.000146385	linear
Symmetric dimethylarginine	0.565144	1.07259e-18	5.32006e-16	0.588588	1.68146e-20	8.35684e-18	non-linear
Sarcosine	-0.0481647	0.492842	1	-0.0711586	0.310634	1	no
Taurine	0.0644293	0.358723	1	0.0667663	0.341521	1	no
Tryptophan betaine	0.00114991	0.986944	1	-0.00527474	0.940166	1	no
alpha-Aminoadipic acid	0.013468	0.848007	1	-0.0272166	0.698482	1	no
trans-4-Hydroxyproline	0.0333785	0.634704	1	0.0627565	0.371363	1	no
Trigonelline	0.258005	0.00018778	0.084689	0.247038	0.000355714	0.17679	no
p-Cresol sulfate	0.381138	1.72086e-08	8.29454e-06	0.387262	9.67938e-09	4.81065e-06	non-linear
Cortisol	0.0311881	0.657098	1	0.0490978	0.484491	1	no
Cortisone	-0.245806	0.000381529	0.168517	-0.248347	0.000330103	0.164061	no
Dehydroepiandrosterone sulfate	-0.73205	1.10323e-35	5.48303e-33	-0.740241	7.53959e-37	3.74718e-34	non-linear
Hypoxanthine	0.0588163	0.402201	1	0.0286256	0.68369	1	no
Choline	0.468699	1.36545e-12	6.71803e-10	0.469103	1.2988e-12	6.45503e-10	non-linear
Trimethylamine N-oxide	0.223634	0.00126724	0.539845	0.205692	0.00308888	1	no
Carnitine	-0.0483359	0.491305	1	-0.0624179	0.373954	1	no
Acetylcarnitine	0.24207	0.000470751	0.206189	0.253545	0.00024433	0.121432	no
Propionylcarnitine	0.0605142	0.38873	1	0.0396196	0.572741	1	no
Butyrylcarnitine	0.114065	0.103421	1	0.114273	0.102788	1	no
Valerylcarnitine	0.088091	0.209115	1	0.0704095	0.315768	1	no
Decanoylcarnitine	0.205351	0.00313951	1	0.220071	0.00152111	0.755992	no
Tetradecenoylcarnitine	0.269609	9.25861e-05	0.0426822	0.266827	0.000110018	0.0546788	linear
Octadecenoylcarnitine	0.183361	0.00849755	1	0.202953	0.00351704	1	no
Octadecadienoylcarnitine	0.225556	0.00114707	0.4898	0.237833	0.00059511	0.29577	no
Lysophosphatidylcholine 16:0	-0.0320036	0.648723	1	-0.0332476	0.636033	1	no
Lysophosphatidylcholine 16:1	0.0229563	0.743881	1	0.0179981	0.797843	1	no
Lysophosphatidylcholine 17:0	0.0502378	0.474393	1	0.0574869	0.41294	1	no
Lysophosphatidylcholine 18:0	-0.0345058	0.623304	1	-0.0428739	0.541605	1	no
Lysophosphatidylcholine 18:1	0.0325868	0.642761	1	0.0391844	0.576968	1	no
Lysophosphatidylcholine 18:2	-0.130278	0.0626262	1	-0.117713	0.0927751	1	no
Lysophosphatidylcholine 20:3	-0.18605	0.00756479	1	-0.191302	0.00600152	1	no
Lysophosphatidylcholine 20:4	-0.18118	0.00932795	1	-0.186008	0.0075787	1	no
Lysophosphatidylcholine 24:0	0.161407	0.020775	1	0.146165	0.0365088	1	no
Lysophosphatidylcholine 26:0	0.00585917	0.933551	1	-0.00522898	0.940684	1	no
Lysophosphatidylcholine 26:1	0.149475	0.0324273	1	0.141066	0.0436427	1	no
Phosphatidylcholine 24:0	-0.117804	0.0925208	1	-0.172595	0.0133359	1	no
Phosphatidylcholine 28:1	0.263973	0.000131057	0.0596309	0.140871	0.0439376	1	no
Phosphatidylcholine 30:0	0.188539	0.00678355	1	-0.10805	0.12305	1	no
Phosphatidylcholine 32:0	0.253124	0.000250415	0.111935	0.247382	0.000348821	0.173364	no
Phosphatidylcholine 32:1	0.0817877	0.243689	1	0.170894	0.0142892	1	no
Phosphatidylcholine 32:2	-0.00764412	0.913377	1	0.249958	0.000300902	0.149548	no
Phosphatidylcholine 32:3	0.0973138	0.165107	1	0.0629181	0.37013	1	no
Phosphatidylcholine 34:1	0.119142	0.0888508	1	-0.0205603	0.76982	1	no
Phosphatidylcholine 34:2	0.0291031	0.678703	1	0.0741527	0.290663	1	no
Phosphatidylcholine 34:3	0.0502076	0.474659	1	0.10045	0.15184	1	no
Phosphatidylcholine 34:4	-0.158619	0.0231116	1	0.0289177	0.680638	1	no
Phosphatidylcholine 36:0	0.0703255	0.316347	1	0.035071	0.617622	1	no
Phosphatidylcholine 36:1	0.0233508	0.739637	1	-0.189872	0.00639546	1	no
Phosphatidylcholine 36:2	0.0628428	0.370704	1	0.0539394	0.442409	1	no
Phosphatidylcholine 36:3	0.0331294	0.637234	1	-0.0027372	0.968929	1	no
Phosphatidylcholine 36:4	-0.10106	0.149357	1	0.0499313	0.477097	1	no
Phosphatidylcholine 36:5	0.168423	0.0157793	1	0.0283383	0.686696	1	no
Phosphatidylcholine 36:6	0.0894279	0.20226	1	-0.122735	0.0795706	1	no
Phosphatidylcholine 38:0	0.257414	0.000194502	0.0875257	0.125547	0.0728661	1	no
Phosphatidylcholine 38:1	0.115258	0.0998368	1	0.0458497	0.513887	1	no
Phosphatidylcholine 38:3	-0.0052676	0.940247	1	0.239707	0.000536781	0.26678	no
Phosphatidylcholine 38:4	-0.0508871	0.468693	1	0.104668	0.135289	1	no
Phosphatidylcholine 38:5	0.125266	0.0735145	1	-0.0322745	0.645951	1	no
Phosphatidylcholine 38:6	0.211054	0.00238434	0.99904	-0.080823	0.249313	1	no
Phosphatidylcholine 40:2	0.170358	0.0146016	1	0.0885388	0.206801	1	no
Phosphatidylcholine 40:3	0.243364	0.000437845	0.192652	0.175864	0.0116597	1	no
Phosphatidylcholine 40:4	-0.130141	0.0629062	1	0.180313	0.00967741	1	no
Phosphatidylcholine 40:5	0.0634516	0.366078	1	0.245011	0.000399084	0.198345	no
Phosphatidylcholine 40:6	0.297525	1.47511e-05	0.00688875	-0.138305	0.0479707	1	linear
Phosphatidylcholine 42:0	0.254508	0.000230923	0.103684	0.0315081	0.653807	1	no
Phosphatidylcholine 42:1	0.215863	0.00188031	0.791611	0.255778	0.000214279	0.106497	no
Phosphatidylcholine 42:2	0.196704	0.00470118	1	0.256832	0.000201327	0.100059	no
Phosphatidylcholine 42:4	0.0597012	0.395146	1	0.218692	0.0016312	0.810709	no
Phosphatidylcholine 42:5	0.245818	0.000381261	0.168517	0.192227	0.00575825	1	no
Phosphatidylcholine 42:6	0.190631	0.00618347	1	0.0845545	0.228051	1	no
Phosphatidylcholine O-28:0	-0.18844	0.00681314	1	0.23417	0.000726425	0.361033	no
Phosphatidylcholine O-28:1	0.145891	0.0368652	1	0.177382	0.0109466	1	no
Phosphatidylcholine O-30:0	0.221732	0.00139746	0.59392	0.223175	0.00129761	0.644914	no
Phosphatidylcholine O-30:1	-0.0601132	0.391886	1	-0.0610799	0.384303	1	no
Phosphatidylcholine O-30:2	0.290443	2.39469e-05	0.0111353	0.278898	5.13397e-05	0.0255158	linear
Phosphatidylcholine O-32:1	0.210867	0.00240625	1	0.220716	0.00147191	0.731538	no
Phosphatidylcholine O-32:2	0.248535	0.000326563	0.144994	0.242216	0.000466912	0.232055	no
Phosphatidylcholine O-34:0	0.220999	0.00145082	0.615149	0.216954	0.00178039	0.884855	no
Phosphatidylcholine O-34:1	0.291024	2.30243e-05	0.0107293	0.295717	1.67133e-05	0.00830649	non-linear
Phosphatidylcholine O-34:2	0.0913844	0.192522	1	0.104143	0.137271	1	no
Phosphatidylcholine O-34:3	-0.105872	0.130829	1	-0.0868609	0.215569	1	no
Phosphatidylcholine O-36:0	0.151365	0.0302753	1	0.135665	0.0524375	1	no
Phosphatidylcholine O-36:1	0.105787	0.131143	1	0.103395	0.140135	1	no
Phosphatidylcholine O-36:2	0.196626	0.00471798	1	0.205605	0.00310171	1	no
Phosphatidylcholine O-36:3	0.0760338	0.278564	1	0.0863343	0.218375	1	no
Phosphatidylcholine O-36:4	-0.194893	0.00510589	1	-0.19946	0.00414064	1	no
Phosphatidylcholine O-36:5	-0.17582	0.0116807	1	-0.186833	0.00731095	1	no
Phosphatidylcholine O-38:0	0.16468	0.0182963	1	0.1181	0.091699	1	no
Phosphatidylcholine O-38:1	0.235042	0.000692914	0.300032	0.213992	0.00206353	1	no
Phosphatidylcholine O-38:2	0.0854376	0.223213	1	0.0981912	0.161311	1	no
Phosphatidylcholine O-38:3	-0.0216217	0.758297	1	-0.0104209	0.882109	1	no
Phosphatidylcholine O-38:4	-0.0312917	0.656032	1	-0.0330353	0.638191	1	no
Phosphatidylcholine O-38:5	0.0250932	0.720988	1	0.0214573	0.760079	1	no
Phosphatidylcholine O-38:6	0.0735241	0.294783	1	0.049076	0.484686	1	no
Phosphatidylcholine O-40:1	-0.0118535	0.866045	1	-0.0320188	0.648567	1	no
Phosphatidylcholine O-40:2	0.20175	0.00372156	1	0.193122	0.00553129	1	no
Phosphatidylcholine O-40:3	0.183687	0.00837937	1	0.19744	0.00454516	1	no
Phosphatidylcholine O-40:4	0.0595177	0.396602	1	0.0722266	0.30341	1	no
Phosphatidylcholine O-40:5	0.122783	0.0794522	1	0.128605	0.0661025	1	no
Phosphatidylcholine O-40:6	0.288142	2.79525e-05	0.01297	0.27113	8.4185e-05	0.0418399	linear
Phosphatidylcholine O-42:1	-0.0291864	0.677836	1	-0.017822	0.79978	1	no
Phosphatidylcholine O-42:2	0.178397	0.0104914	1	0.168732	0.0155857	1	no
Phosphatidylcholine O-42:3	0.137167	0.0498556	1	0.145586	0.037266	1	no
Phosphatidylcholine O-42:4	0.152597	0.0289403	1	0.167627	0.0162878	1	no
Phosphatidylcholine O-42:5	0.144648	0.0385207	1	0.16258	0.0198551	1	no
Phosphatidylcholine O-44:3	0.0372283	0.596144	1	0.0477407	0.496662	1	no
Phosphatidylcholine O-44:4	0.0879003	0.210107	1	0.102845	0.142266	1	no
Phosphatidylcholine O-44:5	0.150884	0.030812	1	0.165467	0.0177398	1	no
Phosphatidylcholine O-44:6	0.184729	0.008011	1	0.200312	0.00398011	1	no
Sphingomyelin 33:1	0.246702	0.000362597	0.16063	0.239316	0.000548499	0.272604	no
Sphingomyelin 35:1	0.228341	0.000991335	0.425283	0.212318	0.00224113	1	no
Sphingomyelin 41:1	0.0185147	0.792171	1	-0.016779	0.811271	1	no
Sphingomyelin 41:2	0.210145	0.00249244	1	0.181868	0.00905849	1	no
Sphingomyelin 43:1	0.0989876	0.157923	1	0.0709332	0.312173	1	no
Sphingomyelin 34:1	0.281607	4.30558e-05	0.0199348	0.276326	6.05749e-05	0.0301057	linear
Sphingomyelin 34:2	0.316714	3.7173e-06	0.00175085	0.300571	1.19282e-05	0.00592831	linear
Sphingomyelin 36:1	0.116354	0.0966341	1	0.0790156	0.260091	1	no
Sphingomyelin 36:2	0.140852	0.0439652	1	0.107396	0.125348	1	no
Sphingomyelin 38:3	0.187565	0.00708031	1	0.163754	0.0189698	1	no
Sphingomyelin 42:1	-0.062752	0.371398	1	-0.0928189	0.185604	1	no
Sphingomyelin 42:2	0.184178	0.00820404	1	0.16443	0.0184755	1	no
Sphingomyelin 44:1	0.0604354	0.389348	1	0.0378467	0.590051	1	no
Sphingomyelin 44:2	0.164886	0.018149	1	0.152539	0.0290013	1	no
Hexose	0.169684	0.0150027	1	0.123225	0.0783663	1	no
Cholesteryl ester 14:0	0.0119828	0.864598	1	-0.0206099	0.769281	1	no
Cholesteryl ester 15:0	0.102134	0.14506	1	0.0779103	0.266838	1	no
Cholesteryl ester 16:0	-0.0191909	0.784763	1	-0.0447755	0.523808	1	no
Cholesteryl ester 16:1	-0.0581941	0.407206	1	-0.0738881	0.292392	1	no
Cholesteryl ester 17:0	0.00832701	0.905673	1	-0.0207943	0.767276	1	no
Cholesteryl ester 17:1	-0.0207447	0.767815	1	-0.0511602	0.466307	1	no
Cholesteryl ester 18:0	-0.0997144	0.154878	1	-0.131814	0.0595685	1	no
Cholesteryl ester 18:1	-0.110782	0.113802	1	-0.122257	0.0807576	1	no
Cholesteryl ester 18:2	-0.0371233	0.597182	1	-0.0464544	0.508346	1	no
Cholesteryl ester 18:3	-0.144552	0.0386512	1	-0.161706	0.0205372	1	no
Cholesteryl ester 20:3	-0.160672	0.0213706	1	-0.181802	0.00908402	1	no
Cholesteryl ester 20:4	-0.106061	0.13014	1	-0.126584	0.0705128	1	no
Cholesteryl ester 20:5	0.182471	0.00882821	1	0.140491	0.0445156	1	no
Cholesteryl ester 22:5	0.000450887	0.994881	1	-0.0278141	0.692194	1	no
Cholesteryl ester 22:6	0.219437	0.00157087	0.664476	0.179579	0.00998235	1	no
Ceramide d16:1/18:0	-0.0024674	0.971991	1	-0.00682388	0.922642	1	no
Ceramide d16:1/20:0	0.254419	0.000232124	0.103992	0.229076	0.000953657	0.473968	no
Ceramide d16:1/22:0	0.229522	0.000931411	0.401438	0.20281	0.00354077	1	no
Ceramide d16:1/23:0	0.239688	0.000537335	0.234278	0.209813	0.00253294	1	no
Ceramide d16:1/24:0	0.185796	0.00764889	1	0.153287	0.0282141	1	no
Ceramide d18:1/14:0	0.0718889	0.305682	1	0.0773601	0.270241	1	no
Ceramide d18:1/16:0	0.322836	2.34601e-06	0.00110966	0.318034	3.36905e-06	0.00167442	linear
Ceramide d18:1/18:0	0.115565	0.0989333	1	0.0854063	0.223383	1	no
Ceramide d18:1/20:0-OH	0.0777743	0.267677	1	0.0713099	0.309604	1	no
Ceramide d18:1/20:0	0.162705	0.0197591	1	0.134288	0.0549018	1	no
Ceramide d18:1/22:0	0.124332	0.0757042	1	0.106779	0.127543	1	no
Ceramide d18:1/23:0	0.202659	0.00356611	1	0.176653	0.0112838	1	no
Ceramide d18:1/24:0	0.04511	0.520708	1	0.024686	0.725331	1	no
Ceramide d18:1/24:1	0.347896	3.20098e-07	0.000152687	0.331643	1.18843e-06	0.000590649	linear
Ceramide d18:1/25:0	0.383066	1.43753e-08	6.94326e-06	0.359341	1.21432e-07	6.03516e-05	linear
Ceramide d18:1/26:0	0.278689	5.20391e-05	0.0240421	0.25265	0.000257439	0.127947	linear
Ceramide d18:1/26:1	0.233368	0.000758498	0.327671	0.223693	0.00126337	0.627893	no
Ceramide d18:2/16:0	0.305025	8.70699e-06	0.00408358	0.296197	1.61691e-05	0.00803604	linear
Ceramide d18:2/18:0	0.176605	0.0113068	1	0.15626	0.0252609	1	no
Ceramide d18:2/20:0	0.173784	0.0127032	1	0.145758	0.03704	1	no
Ceramide d18:2/22:0	0.112683	0.107695	1	0.0936853	0.181514	1	no
Ceramide d18:2/23:0	0.208745	0.0026675	1	0.192988	0.00556486	1	no
Ceramide d18:2/24:0	-0.0310782	0.658231	1	-0.0427863	0.542432	1	no
Ceramide d18:2/24:1	0.331948	1.16039e-06	0.000551183	0.317643	3.46902e-06	0.0017241	linear
Dihydroceramide d18:0/22:0	-0.170988	0.014235	1	-0.151951	0.0296335	1	no
Dihydroceramide d18:0/24:0	0.0739459	0.292014	1	0.0427125	0.543129	1	no
Dihydroceramide d18:0/24:1	0.241959	0.000473669	0.206993	0.213038	0.0021631	1	no
Diacylglyceride 16:0_18:1	-0.0784467	0.263549	1	-0.0879484	0.209856	1	no
Diacylglyceride 16:0_18:2	-0.157396	0.0242057	1	-0.160425	0.0215738	1	no
Diacylglyceride 16:1_18:2	0.0629553	0.369847	1	0.0490239	0.48515	1	no
Diacylglyceride 17:0_18:1	0.0748505	0.286134	1	0.0564581	0.421365	1	no
Diacylglyceride 18:1_18:1	-0.0856471	0.222076	1	-0.0895382	0.201702	1	no
Diacylglyceride 18:1_18:2	-0.0905328	0.196718	1	-0.0926792	0.186269	1	no
Diacylglyceride 18:2_18:2	-0.0970855	0.166106	1	-0.0987685	0.15885	1	no
Diacylglyceride 18:2_18:3	-0.123568	0.0775331	1	-0.127314	0.0688936	1	no
Dihexosylceramide d18:1/14:0	0.269237	9.47522e-05	0.043586	0.270176	8.93631e-05	0.0444135	non-linear
Dihexosylceramide d18:1/16:0	0.249715	0.000305159	0.135796	0.252683	0.000256945	0.127702	no
Dihexosylceramide d18:1/18:0	0.184211	0.00819246	1	0.163273	0.0193285	1	no
Dihexosylceramide d18:1/20:0	0.26487	0.000124064	0.0565733	0.237439	0.000608105	0.302228	no
Dihexosylceramide d18:1/22:0	0.22732	0.00104602	0.447697	0.211149	0.00237331	1	no
Dihexosylceramide d18:1/24:0	0.200891	0.00387405	1	0.185949	0.0075981	1	no
Dihexosylceramide d18:1/24:1	0.26551	0.000119297	0.0545188	0.257476	0.000193782	0.0963098	no
Trihexosylceramide d18:1/16:0	0.370306	4.62666e-08	2.22543e-05	0.362493	9.23587e-08	4.59023e-05	linear
Trihexosylceramide d18:1/18:0	0.184923	0.00794421	1	0.201581	0.00375118	1	no
Trihexosylceramide d18:1/24:1	0.386593	1.03136e-08	4.99177e-06	0.381131	1.72185e-08	8.5576e-06	linear
Trihexosylceramide d18:1/26:1	0.126669	0.0703211	1	0.0994285	0.156071	1	no
Trihexosylceramide d18:1/20:0	-0.164117	0.0187033	1	-0.124916	0.0743283	1	no
Trihexosylceramide d18:1/22:0	0.188687	0.00673953	1	0.19729	0.00457662	1	no
Hexosylceramide d16:1/22:0	0.171457	0.0139671	1	0.160395	0.021598	1	no
Hexosylceramide d16:1/24:0	0.172091	0.013612	1	0.153561	0.0279301	1	no
Hexosylceramide d18:1/16:0	0.413297	7.32519e-10	3.56004e-07	0.402974	2.09372e-09	1.04058e-06	linear
Hexosylceramide d18:1/18:0	0.20432	0.0032971	1	0.197442	0.0045448	1	no
Hexosylceramide d18:1/18:1	0.307979	7.04601e-06	0.00331163	0.28994	2.4772e-05	0.0123117	linear
Hexosylceramide d18:1/20:0	0.354887	1.77874e-07	8.52015e-05	0.339572	6.32569e-07	0.000314387	linear
Hexosylceramide d18:1/22:0	0.265985	0.000115865	0.0531822	0.257554	0.000192887	0.0958648	no
Hexosylceramide d18:1/23:0	0.326668	1.74971e-06	0.00082936	0.313735	4.6338e-06	0.002303	linear
Hexosylceramide d18:1/24:0	0.262718	0.000141448	0.0642176	0.254331	0.000233327	0.115964	no
Hexosylceramide d18:1/24:1	0.43304	8.87521e-11	4.32223e-08	0.42168	3.03979e-10	1.51077e-07	linear
Hexosylceramide d18:1/26:0	-0.0850991	0.225059	1	-0.0871254	0.21417	1	no
Hexosylceramide d18:2/18:0	0.236845	0.000628178	0.272629	0.219663	0.00155291	0.771795	no
Hexosylceramide d18:2/22:0	0.340237	5.99505e-07	0.000285364	0.320979	2.70039e-06	0.0013421	linear
Hexosylceramide d18:2/23:0	0.30005	1.23722e-05	0.0057902	0.281291	4.39532e-05	0.0218447	linear
Hexosylceramide d18:2/24:0	0.358846	1.26732e-07	6.08315e-05	0.334033	9.8457e-07	0.000489331	linear
Triacylglyceride 14:0_32:2	-0.0244657	0.727686	1	-0.0386916	0.581772	1	no
Triacylglyceride 14:0_34:0	-0.0713723	0.30918	1	-0.0832969	0.235069	1	no
Triacylglyceride 14:0_34:1	-0.0210846	0.764122	1	-0.0406666	0.562632	1	no
Triacylglyceride 14:0_34:2	-0.0272617	0.698006	1	-0.0454256	0.517792	1	no
Triacylglyceride 14:0_34:3	-0.0330058	0.638491	1	-0.0464583	0.50831	1	no
Triacylglyceride 14:0_35:1	0.0225739	0.748003	1	0.0127996	0.855465	1	no
Triacylglyceride 14:0_35:2	-0.0467891	0.505292	1	-0.0604759	0.38903	1	no
Triacylglyceride 14:0_36:1	-0.0125893	0.857815	1	-0.0288166	0.681694	1	no
Triacylglyceride 14:0_36:2	-0.00453865	0.948503	1	-0.0193877	0.782611	1	no
Triacylglyceride 14:0_36:3	-0.0405793	0.563472	1	-0.0513785	0.464405	1	no
Triacylglyceride 14:0_36:4	-0.0757161	0.280583	1	-0.0837347	0.232609	1	no
Triacylglyceride 14:0_38:4	-0.0906978	0.1959	1	-0.109071	0.119527	1	no
Triacylglyceride 14:0_38:5	-0.0551069	0.432581	1	-0.0782626	0.264675	1	no
Triacylglyceride 16:0_28:1	-0.0628264	0.370829	1	-0.0631612	0.36828	1	no
Triacylglyceride 16:0_28:2	-0.0564741	0.421233	1	-0.0617227	0.37931	1	no
Triacylglyceride 16:0_30:2	0.00138659	0.984257	1	-0.0121465	0.862766	1	no
Triacylglyceride 16:0_32:0	-0.0564761	0.421217	1	-0.0767362	0.274135	1	no
Triacylglyceride 16:0_32:1	-0.0326079	0.642546	1	-0.0529749	0.450623	1	no
Triacylglyceride 16:0_32:2	-0.0441496	0.529632	1	-0.0639532	0.362293	1	no
Triacylglyceride 16:0_32:3	-0.0446417	0.52505	1	-0.0583766	0.405734	1	no
Triacylglyceride 16:0_33:1	-0.0135001	0.847649	1	-0.0276276	0.694155	1	no
Triacylglyceride 16:0_33:2	-0.0433126	0.537473	1	-0.0535117	0.446041	1	no
Triacylglyceride 16:0_34:0	-0.0659608	0.34739	1	-0.0886219	0.206373	1	no
Triacylglyceride 16:0_34:1	-0.0470577	0.502848	1	-0.0698396	0.319711	1	no
Triacylglyceride 16:0_34:2	-0.0347749	0.620596	1	-0.0578416	0.410058	1	no
Triacylglyceride 16:0_34:3	-0.024813	0.723976	1	-0.0443004	0.528226	1	no
Triacylglyceride 16:0_34:4	-0.0581016	0.407953	1	-0.0785978	0.262627	1	no
Triacylglyceride 16:0_35:1	-0.0222308	0.751707	1	-0.0403352	0.565822	1	no
Triacylglyceride 16:0_35:2	-0.0195811	0.780497	1	-0.0380789	0.58777	1	no
Triacylglyceride 16:0_35:3	-0.0514977	0.463368	1	-0.0680161	0.33254	1	no
Triacylglyceride 16:0_36:2	-0.0180903	0.796831	1	-0.0408447	0.560921	1	no
Triacylglyceride 16:0_36:3	-0.0354318	0.614006	1	-0.0547601	0.435487	1	no
Triacylglyceride 16:0_36:4	-0.0592858	0.398448	1	-0.0740746	0.291172	1	no
Triacylglyceride 16:0_36:5	-0.106302	0.129265	1	-0.119671	0.0874315	1	no
Triacylglyceride 16:0_36:6	-0.0611528	0.383734	1	-0.0820997	0.241889	1	no
Triacylglyceride 16:0_37:3	-0.152944	0.0285727	1	-0.149287	0.0326478	1	no
Triacylglyceride 16:0_38:1	-0.115894	0.0979683	1	-0.130426	0.062327	1	no
Triacylglyceride 16:0_38:2	-0.0983911	0.160456	1	-0.117324	0.0938677	1	no
Triacylglyceride 16:0_38:3	-0.125371	0.0732706	1	-0.146474	0.0361102	1	no
Triacylglyceride 16:0_38:4	-0.142305	0.0418095	1	-0.166445	0.0170689	1	no
Triacylglyceride 16:0_38:5	-0.132348	0.058533	1	-0.161715	0.0205302	1	no
Triacylglyceride 16:0_38:6	-0.0518014	0.460731	1	-0.0917103	0.190934	1	no
Triacylglyceride 16:0_38:7	0.0134265	0.84847	1	-0.0231818	0.741455	1	no
Triacylglyceride 16:0_40:6	-0.0837937	0.232279	1	-0.116965	0.094884	1	no
Triacylglyceride 16:0_40:7	-0.0238524	0.734252	1	-0.0682216	0.331078	1	no
Triacylglyceride 16:0_40:8	0.0119158	0.865348	1	-0.0329919	0.638633	1	no
Triacylglyceride 16:1_28:0	-0.0419394	0.55046	1	-0.0549089	0.434239	1	no
Triacylglyceride 16:1_30:1	-0.032216	0.646549	1	-0.0424469	0.545642	1	no
Triacylglyceride 16:1_32:0	-0.00966568	0.890597	1	-0.0306068	0.663094	1	no
Triacylglyceride 16:1_32:1	0.0152723	0.827942	1	-7.53771e-05	0.999144	1	no
Triacylglyceride 16:1_32:2	0.022929	0.744176	1	0.0088942	0.899281	1	no
Triacylglyceride 16:1_33:1	-5.47496e-05	0.999378	1	-0.016426	0.815169	1	no
Triacylglyceride 16:1_34:0	0.0413561	0.556022	1	0.0203152	0.772489	1	no
Triacylglyceride 16:1_34:1	0.0192368	0.784261	1	-0.00391969	0.955518	1	no
Triacylglyceride 16:1_34:2	0.0239753	0.732935	1	0.000973577	0.988946	1	no
Triacylglyceride 16:1_34:3	0.0138791	0.843426	1	-0.0020922	0.976248	1	no
Triacylglyceride 16:1_36:1	-0.0231188	0.742132	1	-0.0472368	0.501222	1	no
Triacylglyceride 16:1_36:2	0.0229915	0.743502	1	0.00562275	0.936226	1	no
Triacylglyceride 16:1_36:3	-0.00351795	0.960073	1	-0.0186215	0.791	1	no
Triacylglyceride 16:1_36:4	-0.0343268	0.625108	1	-0.0473145	0.500518	1	no
Triacylglyceride 16:1_36:5	-0.0577725	0.410619	1	-0.0718159	0.306175	1	no
Triacylglyceride 16:1_38:3	-0.0599746	0.392981	1	-0.0755864	0.28141	1	no
Triacylglyceride 16:1_38:4	-0.133272	0.0567787	1	-0.151176	0.030485	1	no
Triacylglyceride 16:1_38:5	-0.0667586	0.341577	1	-0.103056	0.141446	1	no
Triacylglyceride 17:0_32:1	-0.0822663	0.240932	1	-0.0889513	0.204685	1	no
Triacylglyceride 17:0_34:1	-0.0324448	0.64421	1	-0.0490452	0.48496	1	no
Triacylglyceride 17:0_34:2	-0.045013	0.521606	1	-0.0611216	0.383978	1	no
Triacylglyceride 17:0_34:3	0.0055113	0.937488	1	-0.00252773	0.971306	1	no
Triacylglyceride 17:0_36:3	-0.0563078	0.422604	1	-0.0685653	0.328642	1	no
Triacylglyceride 17:0_36:4	-0.0707313	0.313556	1	-0.0818892	0.243102	1	no
Triacylglyceride 17:1_32:1	-0.0173111	0.805404	1	-0.0332429	0.63608	1	no
Triacylglyceride 17:1_34:1	0.00345779	0.960756	1	-0.0209381	0.765713	1	no
Triacylglyceride 17:1_34:2	0.00435253	0.950612	1	-0.0196247	0.780021	1	no
Triacylglyceride 17:1_34:3	-0.0183188	0.794322	1	-0.0472066	0.501496	1	no
Triacylglyceride 17:1_36:3	0.00493823	0.943977	1	-0.011724	0.867495	1	no
Triacylglyceride 17:1_36:4	-0.00469471	0.946735	1	-0.0273799	0.696761	1	no
Triacylglyceride 17:1_36:5	0.063314	0.36712	1	0.0539946	0.441942	1	no
Triacylglyceride 17:2_34:2	-0.0542257	0.439987	1	-0.0774153	0.269898	1	no
Triacylglyceride 17:2_34:3	-0.00921853	0.895629	1	-0.0140768	0.841225	1	no
Triacylglyceride 17:2_36:2	0.0109499	0.876172	1	-0.024131	0.731267	1	no
Triacylglyceride 17:2_36:3	-0.00553682	0.937199	1	-0.0409984	0.559446	1	no
Triacylglyceride 17:2_36:4	-0.0208458	0.766716	1	-0.0408802	0.56058	1	no
Triacylglyceride 17:2_38:5	-0.0559518	0.425548	1	-0.0540634	0.441359	1	no
Triacylglyceride 17:2_38:6	-0.00469231	0.946762	1	-0.0161245	0.818503	1	no
Triacylglyceride 17:2_38:7	-0.180319	0.00967507	1	-0.166943	0.016736	1	no
Triacylglyceride 18:0_30:0	-0.0392987	0.575857	1	-0.0500159	0.47635	1	no
Triacylglyceride 18:0_30:1	-0.0938623	0.180687	1	-0.095425	0.173504	1	no
Triacylglyceride 18:0_32:0	-0.0729905	0.298311	1	-0.0879895	0.209642	1	no
Triacylglyceride 18:0_32:1	-0.0507781	0.469647	1	-0.0680429	0.332349	1	no
Triacylglyceride 18:0_32:2	-0.0736546	0.293924	1	-0.0867455	0.216182	1	no
Triacylglyceride 18:0_34:2	-0.0821614	0.241534	1	-0.105711	0.131421	1	no
Triacylglyceride 18:0_34:3	-0.105392	0.132596	1	-0.12496	0.0742268	1	no
Triacylglyceride 18:0_36:1	-0.207221	0.0028709	1	-0.194685	0.00515428	1	no
Triacylglyceride 18:0_36:2	-0.112824	0.107254	1	-0.135651	0.0524626	1	no
Triacylglyceride 18:0_36:3	-0.0838084	0.232197	1	-0.101276	0.148486	1	no
Triacylglyceride 18:0_36:4	-0.0727828	0.299692	1	-0.088523	0.206882	1	no
Triacylglyceride 18:0_36:5	-0.101099	0.149199	1	-0.116399	0.0965034	1	no
Triacylglyceride 18:0_38:6	-0.062091	0.376467	1	-0.102476	0.143709	1	no
Triacylglyceride 18:0_38:7	0.0767935	0.273775	1	0.0459792	0.512698	1	no
Triacylglyceride 18:1_26:0	-0.0852072	0.224468	1	-0.0819581	0.242705	1	no
Triacylglyceride 18:1_28:1	-0.0843322	0.229281	1	-0.0846326	0.227621	1	no
Triacylglyceride 18:1_30:0	-0.0260232	0.711099	1	-0.0441639	0.529499	1	no
Triacylglyceride 18:1_30:1	0.00733514	0.916866	1	-0.00519317	0.941089	1	no
Triacylglyceride 18:1_30:2	-0.00161477	0.981667	1	-0.00853204	0.903362	1	no
Triacylglyceride 18:1_31:0	-0.0201939	0.773811	1	-0.0199152	0.776849	1	no
Triacylglyceride 18:1_32:0	-0.0386809	0.581876	1	-0.0605434	0.3885	1	no
Triacylglyceride 18:1_32:1	0.00701207	0.920515	1	-0.0124599	0.859261	1	no
Triacylglyceride 18:1_32:2	-0.0262702	0.708482	1	-0.038968	0.579076	1	no
Triacylglyceride 18:1_32:3	-0.0458514	0.513872	1	-0.054339	0.439031	1	no
Triacylglyceride 18:1_33:0	-0.0169153	0.809767	1	-0.0311753	0.65723	1	no
Triacylglyceride 18:1_33:1	0.0225241	0.74854	1	0.0105294	0.880891	1	no
Triacylglyceride 18:1_33:2	-0.0270783	0.699939	1	-0.0295023	0.674546	1	no
Triacylglyceride 18:1_33:3	-0.0849159	0.226063	1	-0.0859207	0.220597	1	no
Triacylglyceride 18:1_34:1	-0.00960149	0.891319	1	-0.0319141	0.64964	1	no
Triacylglyceride 18:1_34:2	-0.0227904	0.745669	1	-0.0416318	0.553389	1	no
Triacylglyceride 18:1_34:3	-0.0343931	0.624439	1	-0.0478421	0.495748	1	no
Triacylglyceride 18:1_34:4	-0.03474	0.620947	1	-0.0518743	0.460099	1	no
Triacylglyceride 18:1_35:2	-0.0923789	0.187706	1	-0.096682	0.167881	1	no
Triacylglyceride 18:1_35:3	-0.102137	0.145048	1	-0.107469	0.125088	1	no
Triacylglyceride 18:1_36:0	-0.152418	0.0291311	1	-0.164414	0.0184873	1	no
Triacylglyceride 18:1_36:1	-0.0959239	0.171256	1	-0.113588	0.104882	1	no
Triacylglyceride 18:1_36:2	-0.0628513	0.370639	1	-0.0735644	0.294518	1	no
Triacylglyceride 18:1_36:3	-0.0782599	0.264691	1	-0.0830072	0.236707	1	no
Triacylglyceride 18:1_36:4	-0.108423	0.121755	1	-0.111984	0.109912	1	no
Triacylglyceride 18:1_36:5	-0.0991328	0.157311	1	-0.107194	0.126062	1	no
Triacylglyceride 18:1_36:6	-0.0517287	0.461361	1	-0.0679471	0.333032	1	no
Triacylglyceride 18:1_38:5	-0.103692	0.138992	1	-0.137595	0.0491386	1	no
Triacylglyceride 18:1_38:6	-0.00244788	0.972212	1	-0.0522893	0.456514	1	no
Triacylglyceride 18:1_38:7	0.0801639	0.253207	1	0.042418	0.545916	1	no
Triacylglyceride 18:2_28:0	-0.0424488	0.545624	1	-0.0526297	0.453583	1	no
Triacylglyceride 18:2_30:0	-0.0597288	0.394927	1	-0.0769455	0.272824	1	no
Triacylglyceride 18:2_30:1	-0.020644	0.76891	1	-0.0315767	0.653102	1	no
Triacylglyceride 18:2_31:0	-0.250543	0.000290925	0.129752	-0.235689	0.000669019	0.332502	no
Triacylglyceride 18:2_32:0	-0.0667899	0.34135	1	-0.0861905	0.219146	1	no
Triacylglyceride 18:2_32:1	-0.0280304	0.689923	1	-0.0453149	0.518814	1	no
Triacylglyceride 18:2_32:2	-0.0571611	0.415597	1	-0.0663912	0.344246	1	no
Triacylglyceride 18:2_33:0	-0.0566063	0.420145	1	-0.0693328	0.323244	1	no
Triacylglyceride 18:2_33:1	-0.0189781	0.787093	1	-0.0268896	0.701931	1	no
Triacylglyceride 18:2_33:2	-0.0404962	0.564271	1	-0.0382487	0.586105	1	no
Triacylglyceride 18:2_34:0	-0.0666532	0.342341	1	-0.0883516	0.207766	1	no
Triacylglyceride 18:2_34:1	-0.0437657	0.533221	1	-0.0618089	0.378643	1	no
Triacylglyceride 18:2_34:2	-0.0332104	0.63641	1	-0.047341	0.500278	1	no
Triacylglyceride 18:2_34:3	-0.0487124	0.487932	1	-0.0586408	0.403609	1	no
Triacylglyceride 18:2_34:4	-0.0599068	0.393517	1	-0.0700499	0.318252	1	no
Triacylglyceride 18:2_35:1	-0.0739033	0.292293	1	-0.0838762	0.231818	1	no
Triacylglyceride 18:2_35:2	-0.11964	0.0875165	1	-0.11948	0.0879425	1	no
Triacylglyceride 18:2_35:3	-0.132996	0.0572996	1	-0.134354	0.0547811	1	no
Triacylglyceride 18:2_36:0	-0.111427	0.111702	1	-0.126565	0.070555	1	no
Triacylglyceride 18:2_36:1	-0.100328	0.152342	1	-0.115043	0.100477	1	no
Triacylglyceride 18:2_36:2	-0.0842456	0.229761	1	-0.0903285	0.197734	1	no
Triacylglyceride 18:2_36:3	-0.079566	0.256776	1	-0.084113	0.230498	1	no
Triacylglyceride 18:2_36:4	-0.0884525	0.207245	1	-0.0941946	0.179141	1	no
Triacylglyceride 18:2_36:5	-0.0913185	0.192845	1	-0.097753	0.163199	1	no
Triacylglyceride 18:2_38:4	-0.174082	0.0125486	1	-0.191321	0.00599639	1	no
Triacylglyceride 18:2_38:5	-0.12735	0.0688144	1	-0.154885	0.0265924	1	no
Triacylglyceride 18:2_38:6	-0.0327545	0.64105	1	-0.0732397	0.29666	1	no
Triacylglyceride 18:3_30:0	-0.0970628	0.166205	1	-0.107949	0.123402	1	no
Triacylglyceride 18:3_32:0	-0.103888	0.138242	1	-0.121465	0.0827573	1	no
Triacylglyceride 18:3_32:1	-0.0706734	0.313954	1	-0.0857954	0.221273	1	no
Triacylglyceride 18:3_34:0	-0.124793	0.0746155	1	-0.145387	0.0375293	1	no
Triacylglyceride 18:3_34:1	-0.102527	0.143511	1	-0.11977	0.0871684	1	no
Triacylglyceride 18:3_34:2	-0.100965	0.149744	1	-0.114685	0.101545	1	no
Triacylglyceride 18:3_34:3	-0.0774852	0.269465	1	-0.0859639	0.220364	1	no
Triacylglyceride 18:3_35:2	-0.0722957	0.302946	1	-0.0748484	0.286148	1	no
Triacylglyceride 18:3_36:1	-0.133149	0.0570098	1	-0.145782	0.0370077	1	no
Triacylglyceride 18:3_36:2	-0.131797	0.0596006	1	-0.138189	0.0481591	1	no
Triacylglyceride 18:3_36:3	-0.0910541	0.194142	1	-0.0968408	0.167181	1	no
Triacylglyceride 18:3_36:4	-0.118717	0.0900037	1	-0.121644	0.0823008	1	no
Triacylglyceride 18:3_38:5	-0.113114	0.106347	1	-0.140372	0.0446983	1	no
Triacylglyceride 18:3_38:6	-0.0366165	0.602202	1	-0.0669427	0.340244	1	no
Triacylglyceride 20:0_32:3	-0.0592016	0.39912	1	-0.0737625	0.293216	1	no
Triacylglyceride 20:0_32:4	-0.0937608	0.181161	1	-0.0999479	0.153909	1	no
Triacylglyceride 20:0_34:1	-0.103315	0.140442	1	-0.103198	0.140896	1	no
Triacylglyceride 20:1_32:1	-0.097988	0.162185	1	-0.104843	0.134635	1	no
Triacylglyceride 20:1_32:2	-0.028596	0.683999	1	-0.0478502	0.495674	1	no
Triacylglyceride 20:1_32:3	-0.00155594	0.982335	1	-0.00933623	0.894304	1	no
Triacylglyceride 20:1_34:0	-0.0671467	0.338771	1	-0.0710983	0.311045	1	no
Triacylglyceride 20:1_34:1	-0.0763917	0.276301	1	-0.0919141	0.189946	1	no
Triacylglyceride 20:1_34:2	-0.079572	0.25674	1	-0.0935789	0.182013	1	no
Triacylglyceride 20:1_34:3	-0.025684	0.7147	1	-0.0331371	0.637156	1	no
Triacylglyceride 20:2_32:0	0.0425423	0.544739	1	0.00846791	0.904085	1	no
Triacylglyceride 20:2_32:1	0.0378928	0.589598	1	0.00950239	0.892434	1	no
Triacylglyceride 20:2_34:1	-0.0599045	0.393535	1	-0.0861988	0.219102	1	no
Triacylglyceride 20:2_34:2	-0.0923072	0.18805	1	-0.111987	0.109902	1	no
Triacylglyceride 20:2_34:3	-0.000419272	0.99524	1	-0.0179828	0.798011	1	no
Triacylglyceride 20:2_34:4	-0.153904	0.0275776	1	-0.140369	0.0447027	1	no
Triacylglyceride 20:2_36:5	-0.0527356	0.452674	1	-0.0501342	0.475306	1	no
Triacylglyceride 20:3_32:0	-0.100446	0.151856	1	-0.119843	0.086976	1	no
Triacylglyceride 20:3_32:1	-0.073988	0.291739	1	-0.092368	0.187759	1	no
Triacylglyceride 20:3_32:2	-0.0663452	0.344582	1	-0.073796	0.292996	1	no
Triacylglyceride 20:3_34:0	-0.0484295	0.490465	1	-0.0781011	0.265665	1	no
Triacylglyceride 20:3_34:1	-0.115896	0.0979636	1	-0.140242	0.044899	1	no
Triacylglyceride 20:3_34:2	-0.131778	0.0596386	1	-0.155158	0.0263232	1	no
Triacylglyceride 20:3_34:3	-0.0713227	0.309517	1	-0.0990275	0.157755	1	no
Triacylglyceride 20:3_36:3	-0.178825	0.0103046	1	-0.18989	0.00639048	1	no
Triacylglyceride 20:3_36:4	-0.159041	0.0227439	1	-0.168936	0.0154592	1	no
Triacylglyceride 20:3_36:5	-0.0175114	0.803197	1	-0.0443827	0.527459	1	no
Triacylglyceride 20:4_30:0	-0.0771327	0.271656	1	-0.0977629	0.163156	1	no
Triacylglyceride 20:4_32:0	-0.087298	0.21326	1	-0.118035	0.09188	1	no
Triacylglyceride 20:4_32:1	-0.0596223	0.395771	1	-0.0884639	0.207187	1	no
Triacylglyceride 20:4_32:2	-0.0760546	0.278432	1	-0.0975092	0.164256	1	no
Triacylglyceride 20:4_33:2	-0.00454059	0.948481	1	-0.0249533	0.722479	1	no
Triacylglyceride 20:4_34:0	-0.0995405	0.155603	1	-0.133601	0.0561663	1	no
Triacylglyceride 20:4_34:1	-0.0978312	0.162861	1	-0.132043	0.0591233	1	no
Triacylglyceride 20:4_34:2	-0.113572	0.10493	1	-0.146406	0.0361975	1	no
Triacylglyceride 20:4_34:3	-0.109697	0.117407	1	-0.140283	0.0448354	1	no
Triacylglyceride 20:4_35:3	-0.00525587	0.940379	1	-0.0235335	0.737675	1	no
Triacylglyceride 20:4_36:2	-0.119679	0.0874107	1	-0.154211	0.0272663	1	no
Triacylglyceride 20:4_36:3	-0.133051	0.0571946	1	-0.160316	0.0216638	1	no
Triacylglyceride 20:4_36:4	-0.134137	0.0551764	1	-0.159684	0.0221935	1	no
Triacylglyceride 20:4_36:5	-0.139505	0.0460473	1	-0.169972	0.0148301	1	no
Triacylglyceride 20:5_34:0	0.113657	0.104669	1	0.0612021	0.38335	1	no
Triacylglyceride 20:5_34:1	0.0767426	0.274095	1	0.0282062	0.68808	1	no
Triacylglyceride 20:5_34:2	0.0918628	0.190194	1	0.0459364	0.513091	1	no
Triacylglyceride 20:5_36:2	0.09548	0.173255	1	0.046978	0.503573	1	no
Triacylglyceride 20:5_36:3	0.00905163	0.897508	1	-0.0305821	0.663349	1	no
Triacylglyceride 22:2_32:4	-0.229442	0.00093535	0.402201	-0.200715	0.00390607	1	no
Triacylglyceride 22:4_32:0	-0.0265206	0.70583	1	-0.0579292	0.409348	1	no
Triacylglyceride 22:4_32:2	0.018006	0.797757	1	-0.00889929	0.899224	1	no
Triacylglyceride 22:4_34:2	-0.124771	0.0746684	1	-0.141537	0.0429377	1	no
Triacylglyceride 22:5_32:0	-0.0451326	0.520499	1	-0.0748663	0.286033	1	no
Triacylglyceride 22:5_32:1	0.0265563	0.705453	1	-0.00588325	0.933278	1	no
Triacylglyceride 22:5_34:1	-0.0612094	0.383294	1	-0.0944219	0.17809	1	no
Triacylglyceride 22:5_34:2	-0.0667274	0.341803	1	-0.0976291	0.163735	1	no
Triacylglyceride 22:5_34:3	-0.0684504	0.329455	1	-0.102065	0.145331	1	no
Triacylglyceride 22:6_32:0	0.0909281	0.194762	1	0.0400716	0.568366	1	no
Triacylglyceride 22:6_32:1	0.0922295	0.188424	1	0.0469782	0.50357	1	no
Triacylglyceride 22:6_34:1	0.0692505	0.32382	1	0.0182603	0.794964	1	no
Triacylglyceride 22:6_34:2	0.0539321	0.442471	1	0.00837016	0.905187	1	no
Triacylglyceride 22:6_34:3	0.0873835	0.21281	1	0.0482462	0.49211	1	no

## Sheet: counts
Black women	Black men	White women	White men	Count
Aconitic acid	Aconitic acid	Aconitic acid	Aconitic acid	4
Choline	Choline	Choline	Choline	4
Citrulline	Citrulline	Citrulline	Citrulline	4
Cysteine	Cysteine	Cysteine	Cysteine	4
Cystine	Cystine	Cystine	Cystine	4
Dehydroepiandrosterone sulfate	Dehydroepiandrosterone sulfate	Dehydroepiandrosterone sulfate	Dehydroepiandrosterone sulfate	4
Kynurenine	Kynurenine	Kynurenine	Kynurenine	4
Symmetric dimethylarginine	Symmetric dimethylarginine	Symmetric dimethylarginine	Symmetric dimethylarginine	4
Aspartic Acid	Aspartic Acid	Aspartic Acid		3
Asymmetric dimethylarginine		Asymmetric dimethylarginine	Asymmetric dimethylarginine	3
Butyrylcarnitine	Butyrylcarnitine	Butyrylcarnitine		3
Ceramide d18:1/24:1		Ceramide d18:1/24:1	Ceramide d18:1/24:1	3
Ceramide d18:1/25:0		Ceramide d18:1/25:0	Ceramide d18:1/25:0	3
Ceramide d18:2/24:1		Ceramide d18:2/24:1	Ceramide d18:2/24:1	3
	Hippuric acid	Hippuric acid	Hippuric acid	3
Homocysteine		Homocysteine	Homocysteine	3
	Methionine-Sulfoxide	Methionine-Sulfoxide	Methionine-Sulfoxide	3
	p-Cresol sulfate	p-Cresol sulfate	p-Cresol sulfate	3
	Phosphatidylcholine 40:6	Phosphatidylcholine 40:6	Phosphatidylcholine 40:6	3	once negatively associated and twice positively associated with age
Trimethylamine N-oxide		Trimethylamine N-oxide		2
1-Methylhistidine		1-Methylhistidine		2
		5-Aminovaleric acid	5-Aminovaleric acid	2
	Ceramide d16:1/20:0	Ceramide d16:1/20:0		2
		Ceramide d18:1/16:0	Ceramide d18:1/16:0	2
Ceramide d18:1/20:0		Ceramide d18:1/20:0		2
		Ceramide d18:1/26:0	Ceramide d18:1/26:0	2
		Ceramide d18:2/16:0	Ceramide d18:2/16:0	2
Ceramide d18:2/20:0		Ceramide d18:2/20:0		2
gamma-Amino butyric acid		gamma-Amino butyric acid		2
		Hexosylceramide d18:1/16:0	Hexosylceramide d18:1/16:0	2
		Hexosylceramide d18:1/18:1	Hexosylceramide d18:1/18:1	2
		Hexosylceramide d18:1/20:0	Hexosylceramide d18:1/20:0	2
		Hexosylceramide d18:1/23:0	Hexosylceramide d18:1/23:0	2
		Hexosylceramide d18:1/24:0	Hexosylceramide d18:1/24:1	2
		Hexosylceramide d18:2/22:0	Hexosylceramide d18:2/22:0	2
		Hexosylceramide d18:2/24:0	Hexosylceramide d18:2/24:0	2
Indoxyl sulfate		Indoxyl sulfate		2
Ornithine		Ornithine		2
		Phosphatidylcholine O-30:2	Phosphatidylcholine O-30:2	2
		Phosphatidylcholine O-40:6	Phosphatidylcholine O-40:6	2
		Proline betaine	Proline betaine	2
		Sphingomyelin 34:1	Sphingomyelin 34:1	2
		Sphingomyelin 34:2	Sphingomyelin 34:2	2
		Tetradecenoylcarnitine	Tetradecenoylcarnitine	2
Trigonelline	Trigonelline			2
		Trihexosylceramide d18:1/16:0	Trihexosylceramide d18:1/16:0	2
		Trihexosylceramide d18:1/24:1	Trihexosylceramide d18:1/24:1	2
Acetylcarnitine				1
		Alanine		1
		Arachidonic acid (AA, omega-6-FA(20:4))		1
		Carnitine		1
		Ceramide d16:1/22:0		1
		Ceramide d16:1/23:0		1
		Ceramide d16:1/24:0		1
		Ceramide d18:1/18:0		1
		Ceramide d18:1/22:0		1
		Ceramide d18:1/23:0		1
		Ceramide d18:1/24:0		1
		Ceramide d18:1/26:1		1
		Ceramide d18:2/18:0		1
		Ceramide d18:2/22:0		1
		Ceramide d18:2/23:0		1
		Ceramide d18:2/24:0		1
		Cholesteryl ester 15:0		1
		Cholesteryl ester 17:0		1
	Cholesteryl ester 18:3			1
	Cholesteryl ester 20:4			1
		Cholesteryl ester 20:5		1
		Cholesteryl ester 22:6		1
		Cortisone		1
			Creatinine	1
		Decanoylcarnitine		1
			Dihexosylceramide d18:1/14:0	1
		Dihexosylceramide d18:1/18:0		1
		Dihexosylceramide d18:1/20:0		1
		Dihexosylceramide d18:1/22:0		1
		Dihexosylceramide d18:1/24:0		1
		Dihexosylceramide d18:1/24:1		1
		Dihydroceramide d18:0/22:0		1
		Dihydroceramide d18:0/24:1		1
		Glutamine		1
		Glycine		1
		Hexosylceramide d18:1/22:0		1
		Hexosylceramide d18:1/24:1		1
			Hexosylceramide d18:2/23:0	1
		Lysine		1
		Lysophosphatidylcholine 16:1		1
Octadecadienoylcarnitine				1
		Phenylalanine		1
		Phosphatidylcholine 28:1		1
		Phosphatidylcholine 32:0		1
		Phosphatidylcholine 32:2		1
		Phosphatidylcholine 36:5		1
		Phosphatidylcholine 36:6		1
		Phosphatidylcholine 38:0		1
		Phosphatidylcholine 38:3		1
		Phosphatidylcholine 38:6		1
		Phosphatidylcholine 40:3		1
		Phosphatidylcholine 40:5		1
		Phosphatidylcholine 42:0		1
		Phosphatidylcholine 42:1		1
		Phosphatidylcholine 42:2		1
		Phosphatidylcholine 42:4		1
		Phosphatidylcholine O-28:1		1
		Phosphatidylcholine O-32:2		1
			Phosphatidylcholine O-34:1	1
		Phosphatidylcholine O-38:0		1
		Phosphatidylcholine O-38:6		1
		Proline		1
		Propionylcarnitine		1
		Putrescine		1
		Sphingomyelin 33:1		1
		Sphingomyelin 35:1		1
		Sphingomyelin 36:1		1
		Sphingomyelin 36:2		1
		Sphingomyelin 38:3		1
		Sphingomyelin 41:2		1
		Sphingomyelin 42:2		1
		Sphingomyelin 43:1		1
		Sphingomyelin 44:1		1
		Taurine		1
		Triacylglyceride 16:0_40:8		1
		Triacylglyceride 16:1_34:3		1
		Triacylglyceride 16:1_36:1		1
		Triacylglyceride 16:1_36:2		1
		Triacylglyceride 16:1_36:5		1
		Triacylglyceride 16:1_38:5		1
		Triacylglyceride 17:0_34:3		1
		Triacylglyceride 17:0_36:3		1
		Triacylglyceride 17:1_34:3		1
		Triacylglyceride 17:1_36:4		1
		Triacylglyceride 17:1_36:5		1
		Triacylglyceride 18:0_36:1		1
		Triacylglyceride 18:0_38:6		1
		Triacylglyceride 18:0_38:7		1
		Triacylglyceride 18:1_34:4		1
		Triacylglyceride 18:1_36:6		1
		Triacylglyceride 18:1_38:5		1
		Triacylglyceride 18:1_38:6		1
		Triacylglyceride 18:1_38:7		1
		Triacylglyceride 18:2_31:0		1
		Triacylglyceride 18:3_38:6		1
		Triacylglyceride 20:3_36:5		1
		Triacylglyceride 20:4_36:2		1
		Triacylglyceride 20:5_34:0		1
		Triacylglyceride 20:5_34:1		1
		Triacylglyceride 20:5_34:2		1
		Triacylglyceride 20:5_36:2		1
		Triacylglyceride 22:6_32:0		1
		Triacylglyceride 22:6_32:1		1
		Triacylglyceride 22:6_34:1		1
		Triacylglyceride 22:6_34:2		1
		Triacylglyceride 22:6_34:3		1
		Trihexosylceramide d18:1/18:0		1
		Trihexosylceramide d18:1/20:0		1
		Tyrosine		1
		Valerylcarnitine		1
	Tryptophan betaine			1
