# Supplementary material for: Human Metabolome Reference Database in a Biracial Cohort across the Adult Lifespan
Source: Metabolites. 2023 Apr 25;13(5):591. doi: 10.3390/metabo13050591 (PMC10221446; doi:10.3390/metabo13050591)
Supplement: Supplementary file 1 [file metabolites-13-00591-s001.zip › Supplementary Table S3. Sex differences for all metabolites.xlsx]

## Sheet: Group comparison
Metabolite	Women Mean ± 95% CI adjusted by age and ethnicity	Men Mean ± 95% CI adjusted by age and ethnicity	Fold change Women vs. Men adjusted by age and ethnicity	p.value Women vs. Men adjusted by age and ethnicity	q.value Women vs. Men adjusted by age and ethnicity
Alanine	405.69 ± 0.011	406.16 ± 0.012	0.998851	0.949139	1
Arginine	63.27 ± 0.017	64.54 ± 0.018	0.980321	0.472473	1
Asparagine	55.3 ± 0.009	57.08 ± 0.01	0.968698	0.0366567	1
Aspartic Acid	7.23 ± 0.023	7.72 ± 0.024	0.936051	0.0806913	1
Cysteine	70.6 ± 0.01	72.58 ± 0.01	0.972738	0.0897531	1
Glutamine	671.05 ± 0.007	700.79 ± 0.007	0.957571	0.000231588	0.115099
Glutamic Acid	55.62 ± 0.019	65.73 ± 0.02	0.846183	8.47219e-08	4.21068e-05
Glycine	320.83 ± 0.012	276.62 ± 0.013	1.15982	2.94651e-13	1.46442e-10
Histidine	91.49 ± 0.007	94.01 ± 0.008	0.973206	0.0227497	1
Isoleucine	72.81 ± 0.01	86.8 ± 0.01	0.838877	7.38877e-25	3.67222e-22
Leucine	130.22 ± 0.009	153.56 ± 0.01	0.848017	6.68453e-26	3.32221e-23
Lysine	199.23 ± 0.008	202.2 ± 0.009	0.985275	0.27188	1
Methionine	27.92 ± 0.009	30.3 ± 0.009	0.92135	3.8889e-08	1.93278e-05
Phenylalanine	64.88 ± 0.007	69.3 ± 0.008	0.936224	4.52502e-08	2.24893e-05
Proline	186.5 ± 0.012	209.81 ± 0.013	0.888887	1.14687e-08	5.69993e-06
Serine	112.61 ± 0.01	105.53 ± 0.01	1.06715	8.26231e-05	0.0410637
Threonine	143.95 ± 0.01	146.15 ± 0.011	0.984984	0.377698	1
Tryptophan	59.81 ± 0.01	63.67 ± 0.01	0.939388	9.34804e-05	0.0464598
Tyrosine	72.91 ± 0.01	76.67 ± 0.011	0.950988	0.00287433	1
Valine	225.01 ± 0.008	247.72 ± 0.009	0.908314	7.0715e-12	3.51453e-09
Cholic acid	0.05 ± 0.076	0.08 ± 0.081	0.545564	1.9839e-06	0.000985998
Chenodeoxycholic acid	0.07 ± 0.069	0.13 ± 0.073	0.502914	2.47974e-09	1.23243e-06
Deoxycholic acid	0.32 ± 0.047	0.4 ± 0.05	0.804862	0.00598742	1
Glycocholic acid	0.14 ± 0.044	0.18 ± 0.047	0.807026	0.00337678	1
Glycochenodeoxycholic acid	0.33 ± 0.042	0.43 ± 0.044	0.767697	0.000160711	0.0798733
Glycodeoxycholic acid	0.24 ± 0.054	0.27 ± 0.057	0.907427	0.275375	1
Glycolithocholic acid	0.01 ± 0.044	0.01 ± 0.046	0.918662	0.242684	1
Glycolithocholic acid sulfate	0.25 ± 0.04	0.29 ± 0.043	0.871816	0.0407219	1
Glycoursodeoxycholic acid	0.05 ± 0.062	0.06 ± 0.065	0.869722	0.173971	1
Taurocholic acid	0.02 ± 0.058	0.02 ± 0.061	0.998801	0.990045	1
Taurochenodeoxycholic acid	0.06 ± 0.049	0.06 ± 0.052	0.936987	0.422525	1
Taurodeoxycholic acid	0.05 ± 0.053	0.04 ± 0.056	1.14764	0.117715	1
Tauro-muricholic acids	0.01 ± 0.049	0.01 ± 0.052	1.16117	0.0676203	1
gamma-Amino butyric acid	0.19 ± 0.01	0.18 ± 0.01	1.04525	0.00530693	1
Putrescine	0.11 ± 0.026	0.11 ± 0.027	0.959838	0.339006	1
Serotonin	0.08 ± 0.048	0.07 ± 0.051	1.20665	0.0179645	1
beta-Alanine	2.74 ± 0.014	3.31 ± 0.015	0.827143	2.28858e-15	1.13743e-12
Arachidonic acid (AA, omega-6-FA(20:4))	2.41 ± 0.051	2.59 ± 0.054	0.93352	0.41831	1
Docosahexaenoic acid (DHA, omega-3-FA(22:6))	7.29 ± 0.025	6.26 ± 0.027	1.16337	0.000291936	0.145092
Eicosapentaenoic acid	0.6 ± 0.035	0.57 ± 0.037	1.04697	0.434626	1
Octadecenoic acid	194.59 ± 0.02	173.57 ± 0.021	1.12109	0.000508276	0.252613
Octadecadienoic acid	55.3 ± 0.028	54.06 ± 0.029	1.02288	0.620774	1
Eicosenoic acid	2.02 ± 0.028	1.86 ± 0.03	1.08809	0.068253	1
Eicosadienoic acid	1.51 ± 0.028	1.42 ± 0.03	1.06202	0.195275	1
Eicosatrienoic acid	0.72 ± 0.031	0.67 ± 0.033	1.0663	0.218774	1
Aconitic acid	11.68 ± 0.014	11.53 ± 0.014	1.0126	0.578733	1
Hippuric acid	5.43 ± 0.041	5.58 ± 0.043	0.97386	0.6971	1
Lactic acid	4249.45 ± 0.015	4233.63 ± 0.016	1.00374	0.882362	1
Indoleacetic acid	2.09 ± 0.021	2.31 ± 0.022	0.905785	0.00430236	1
Indolepropionic acid	0.72 ± 0.037	0.69 ± 0.039	1.04647	0.461174	1
Indoxyl sulfate	6.37 ± 0.027	6.31 ± 0.029	1.01096	0.80856	1
1-Methylhistidine	5.88 ± 0.015	6.59 ± 0.016	0.891967	6.52551e-06	0.00324318
3-Methylhistidine	7.21 ± 0.05	8.28 ± 0.053	0.87056	0.0931809	1
5-Aminovaleric acid	0.04 ± 0.022	0.04 ± 0.023	0.921972	0.0250938	1
alpha-Aminobutyric acid	18.31 ± 0.015	18.47 ± 0.016	0.99133	0.725708	1
Asymmetric dimethylarginine	0.55 ± 0.007	0.55 ± 0.008	1.0067	0.5899	1
Betaine	27.97 ± 0.015	33.98 ± 0.016	0.823236	4.0509e-14	2.0133e-11
Citrulline	39.37 ± 0.012	41.51 ± 0.012	0.948391	0.00623849	1
Creatinine	76.52 ± 0.01	99.06 ± 0.01	0.772495	3.13685e-49	1.55902e-46
Cystine	40.79 ± 0.02	44.18 ± 0.022	0.923173	0.0184111	1
Homoarginine	2.88 ± 0.018	3.5 ± 0.019	0.82404	3.57518e-10	1.77687e-07
Homocysteine	6.42 ± 0.013	7.29 ± 0.014	0.879629	2.79601e-09	1.38962e-06
Kynurenine	2.03 ± 0.011	2.15 ± 0.012	0.94762	0.00482572	1
Methionine-Sulfoxide	0.59 ± 0.017	0.55 ± 0.018	1.07456	0.00902102	1
Ornithine	114.29 ± 0.013	117.24 ± 0.013	0.974841	0.228107	1
Proline betaine	3.88 ± 0.061	4.89 ± 0.064	0.793478	0.0222809	1
Symmetric dimethylarginine	0.59 ± 0.01	0.62 ± 0.01	0.940015	9.98697e-05	0.0496353
Sarcosine	4.07 ± 0.012	4.37 ± 0.012	0.930582	0.000224914	0.111782
Taurine	69 ± 0.015	61.18 ± 0.016	1.12783	2.73218e-06	0.00135789
Tryptophan betaine	0.51 ± 0.054	0.46 ± 0.057	1.11882	0.212599	1
alpha-Aminoadipic acid	0.74 ± 0.02	0.96 ± 0.021	0.769875	5.70927e-15	2.83751e-12
trans-4-Hydroxyproline	11.94 ± 0.019	14.39 ± 0.02	0.829404	4.53917e-09	2.25597e-06
Trigonelline	0.39 ± 0.059	0.3 ± 0.062	1.31027	0.00553015	1
p-Cresol sulfate	42.4 ± 0.03	40.88 ± 0.032	1.03721	0.465297	1
Cortisol	0.32 ± 0.018	0.26 ± 0.019	1.19976	1.30584e-09	6.49005e-07
Cortisone	0.06 ± 0.017	0.06 ± 0.018	1.03651	0.195617	1
Dehydroepiandrosterone sulfate	1.11 ± 0.031	1.73 ± 0.033	0.642836	5.25541e-17	2.61194e-14
Hypoxanthine	1.36 ± 0.05	1.4 ± 0.053	0.974572	0.75709	1
Choline	14.38 ± 0.011	15.65 ± 0.011	0.918952	1.98653e-06	0.000987305
Trimethylamine N-oxide	5.46 ± 0.038	6.78 ± 0.04	0.805145	0.000569669	0.283126
Carnitine	39.4 ± 0.011	43.07 ± 0.012	0.914776	1.91129e-06	0.000949912
Acetylcarnitine	5.46 ± 0.016	5.7 ± 0.017	0.95693	0.0924696	1
Propionylcarnitine	0.31 ± 0.023	0.36 ± 0.024	0.852001	2.08699e-05	0.0103723
Butyrylcarnitine	0.17 ± 0.024	0.18 ± 0.026	0.925671	0.0543816	1
Valerylcarnitine	0.1 ± 0.025	0.12 ± 0.026	0.857252	0.000189178	0.0940213
Decanoylcarnitine	0.24 ± 0.029	0.25 ± 0.031	0.973407	0.573722	1
Tetradecenoylcarnitine	0.05 ± 0.027	0.05 ± 0.029	1.00421	0.926452	1
Octadecenoylcarnitine	0.11 ± 0.027	0.13 ± 0.029	0.862079	0.00101637	0.505135
Octadecadienoylcarnitine	0.08 ± 0.027	0.09 ± 0.029	0.861755	0.00100969	0.501814
Lysophosphatidylcholine 16:0	105.32 ± 0.011	110.44 ± 0.011	0.953658	0.00789525	1
Lysophosphatidylcholine 16:1	2.78 ± 0.014	2.69 ± 0.015	1.03176	0.186494	1
Lysophosphatidylcholine 17:0	2.02 ± 0.014	2.05 ± 0.014	0.988833	0.618319	1
Lysophosphatidylcholine 18:0	34.19 ± 0.012	34.78 ± 0.013	0.982952	0.381875	1
Lysophosphatidylcholine 18:1	21.5 ± 0.013	22.82 ± 0.014	0.94224	0.00794473	1
Lysophosphatidylcholine 18:2	35.35 ± 0.016	41.23 ± 0.017	0.857291	1.22992e-08	6.1127e-06
Lysophosphatidylcholine 20:3	2.01 ± 0.016	2.28 ± 0.017	0.879911	2.04763e-06	0.00101767
Lysophosphatidylcholine 20:4	7.43 ± 0.015	8.8 ± 0.016	0.843758	7.25512e-11	3.60579e-08
Lysophosphatidylcholine 24:0	0.16 ± 0.018	0.16 ± 0.019	1.02653	0.384811	1
Lysophosphatidylcholine 26:0	0.16 ± 0.031	0.15 ± 0.033	1.01551	0.764907	1
Lysophosphatidylcholine 26:1	0.16 ± 0.026	0.15 ± 0.028	1.04924	0.266985	1
Phosphatidylcholine 24:0	0.04 ± 0.034	0.04 ± 0.036	0.95386	0.398238	1
Phosphatidylcholine 28:1	3.66 ± 0.012	3 ± 0.013	1.21791	1.92911e-20	9.58768e-18
Phosphatidylcholine 30:0	3.75 ± 0.015	3.11 ± 0.016	1.20493	5.8955e-13	2.93006e-10
Phosphatidylcholine 32:0	12.81 ± 0.01	11.86 ± 0.011	1.07971	1.04953e-05	0.00521618
Phosphatidylcholine 32:1	9.64 ± 0.023	7.84 ± 0.024	1.22905	7.01201e-08	3.48497e-05
Phosphatidylcholine 32:2	3.45 ± 0.029	2.77 ± 0.03	1.24494	4.34285e-06	0.00215839
Phosphatidylcholine 32:3	0.66 ± 0.012	0.54 ± 0.013	1.22335	1.58613e-22	7.88307e-20
Phosphatidylcholine 34:1	159.17 ± 0.012	142.66 ± 0.013	1.1157	6.22408e-08	3.09337e-05
Phosphatidylcholine 34:2	354.65 ± 0.009	322.63 ± 0.009	1.09927	8.85263e-11	4.39975e-08
Phosphatidylcholine 34:3	15.08 ± 0.013	12.31 ± 0.014	1.22504	2.8708e-19	1.42679e-16
Phosphatidylcholine 34:4	1.75 ± 0.017	1.41 ± 0.018	1.23593	2.2214e-13	1.10404e-10
Phosphatidylcholine 36:0	1.54 ± 0.022	1.37 ± 0.023	1.122	0.00158397	0.787235
Phosphatidylcholine 36:1	40.33 ± 0.011	35.77 ± 0.012	1.12727	8.59304e-11	4.27074e-08
Phosphatidylcholine 36:2	218.2 ± 0.009	193.97 ± 0.01	1.12493	1.57661e-14	7.83576e-12
Phosphatidylcholine 36:3	115.73 ± 0.01	103.16 ± 0.011	1.12177	4.91632e-11	2.44341e-08
Phosphatidylcholine 36:4	177.98 ± 0.011	165.84 ± 0.012	1.07325	0.00017437	0.0866618
Phosphatidylcholine 36:5	21.12 ± 0.023	18.26 ± 0.025	1.15671	0.000172392	0.0856786
Phosphatidylcholine 36:6	0.89 ± 0.019	0.69 ± 0.021	1.27991	6.66911e-14	3.31455e-11
Phosphatidylcholine 38:0	2.86 ± 0.014	2.52 ± 0.015	1.13456	1.71264e-07	8.51181e-05
Phosphatidylcholine 38:1	0.49 ± 0.034	0.42 ± 0.036	1.16289	0.00829666	1
Phosphatidylcholine 38:3	38.69 ± 0.012	34.29 ± 0.013	1.12845	1.72213e-09	8.55898e-07
Phosphatidylcholine 38:4	103.26 ± 0.012	95.81 ± 0.013	1.07779	0.000223552	0.111105
Phosphatidylcholine 38:5	48.02 ± 0.012	44 ± 0.013	1.09147	1.68784e-05	0.00838854
Phosphatidylcholine 38:6	71.54 ± 0.015	62.13 ± 0.015	1.1514	8.40817e-09	4.17886e-06
Phosphatidylcholine 40:2	0.26 ± 0.012	0.24 ± 0.013	1.06793	0.0015736	0.782078
Phosphatidylcholine 40:3	0.43 ± 0.011	0.4 ± 0.011	1.07929	2.39263e-05	0.0118914
Phosphatidylcholine 40:4	2.51 ± 0.014	2.45 ± 0.015	1.02287	0.32526	1
Phosphatidylcholine 40:5	6.96 ± 0.014	6.74 ± 0.014	1.03258	0.156088	1
Phosphatidylcholine 40:6	23.09 ± 0.015	20.26 ± 0.016	1.13976	1.65729e-07	8.23673e-05
Phosphatidylcholine 42:0	0.51 ± 0.013	0.46 ± 0.014	1.1027	1.00268e-05	0.0049833
Phosphatidylcholine 42:1	0.28 ± 0.013	0.26 ± 0.014	1.09469	3.1384e-05	0.0155979
Phosphatidylcholine 42:2	0.23 ± 0.013	0.22 ± 0.014	1.0811	0.000431475	0.214443
Phosphatidylcholine 42:4	0.16 ± 0.011	0.15 ± 0.011	1.03654	0.0425554	1
Phosphatidylcholine 42:5	0.25 ± 0.012	0.23 ± 0.013	1.09495	5.90365e-06	0.00293412
Phosphatidylcholine 42:6	0.38 ± 0.013	0.34 ± 0.014	1.11724	2.24631e-07	0.000111642
Phosphatidylcholine O-28:0	0.2 ± 0.029	0.19 ± 0.031	1.01388	0.775948	1
Phosphatidylcholine O-28:1	0.39 ± 0.017	0.32 ± 0.018	1.22533	1.57863e-12	7.84581e-10
Phosphatidylcholine O-30:0	0.32 ± 0.015	0.28 ± 0.015	1.14845	1.44105e-08	7.16204e-06
Phosphatidylcholine O-30:1	0.06 ± 0.055	0.06 ± 0.059	1.01944	0.83433	1
Phosphatidylcholine O-30:2	0.12 ± 0.012	0.1 ± 0.013	1.24064	1.14182e-25	5.67486e-23
Phosphatidylcholine O-32:1	2.66 ± 0.011	2.46 ± 0.012	1.08127	3.17761e-05	0.0157927
Phosphatidylcholine O-32:2	0.82 ± 0.012	0.68 ± 0.013	1.20147	1.70559e-19	8.4768e-17
Phosphatidylcholine O-34:0	1.29 ± 0.013	1.16 ± 0.014	1.1088	1.30951e-06	0.000650827
Phosphatidylcholine O-34:1	8.48 ± 0.01	7.39 ± 0.011	1.14739	1.64937e-15	8.19736e-13
Phosphatidylcholine O-34:2	11.64 ± 0.011	10.22 ± 0.012	1.13909	1.05272e-11	5.23204e-09
Phosphatidylcholine O-34:3	8.93 ± 0.014	7.76 ± 0.014	1.1499	9.91408e-10	4.9273e-07
Phosphatidylcholine O-36:0	0.72 ± 0.013	0.65 ± 0.014	1.10123	8.50231e-06	0.00422565
Phosphatidylcholine O-36:1	6.69 ± 0.011	5.86 ± 0.012	1.14222	6.97183e-13	3.465e-10
Phosphatidylcholine O-36:2	13.19 ± 0.01	11.44 ± 0.011	1.15342	6.9327e-16	3.44555e-13
Phosphatidylcholine O-36:3	7.25 ± 0.011	6.46 ± 0.012	1.12237	1.4542e-09	7.22739e-07
Phosphatidylcholine O-36:4	16.52 ± 0.012	16.37 ± 0.013	1.00933	0.651937	1
Phosphatidylcholine O-36:5	12.1 ± 0.013	11.68 ± 0.014	1.03514	0.12321	1
Phosphatidylcholine O-38:0	2.03 ± 0.015	1.67 ± 0.016	1.21593	7.18872e-14	3.57279e-11
Phosphatidylcholine O-38:1	0.12 ± 0.073	0.11 ± 0.078	1.12751	0.325255	1
Phosphatidylcholine O-38:2	1.6 ± 0.012	1.42 ± 0.012	1.12903	7.91102e-10	3.93178e-07
Phosphatidylcholine O-38:3	3.19 ± 0.011	2.83 ± 0.011	1.12786	1.17501e-11	5.83979e-09
Phosphatidylcholine O-38:4	11.73 ± 0.011	11.32 ± 0.012	1.03626	0.0580188	1
Phosphatidylcholine O-38:5	16.75 ± 0.01	16.44 ± 0.011	1.01857	0.282288	1
Phosphatidylcholine O-38:6	7.46 ± 0.013	6.73 ± 0.014	1.10756	2.90981e-06	0.00144618
Phosphatidylcholine O-40:1	1.25 ± 0.012	1.15 ± 0.013	1.08833	1.99973e-05	0.00993866
Phosphatidylcholine O-40:2	1.57 ± 0.011	1.37 ± 0.012	1.14348	2.06392e-12	1.02577e-09
Phosphatidylcholine O-40:3	0.89 ± 0.01	0.78 ± 0.01	1.14286	1.89645e-16	9.42535e-14
Phosphatidylcholine O-40:4	2 ± 0.01	1.92 ± 0.011	1.04413	0.0105526	1
Phosphatidylcholine O-40:5	3.02 ± 0.01	2.9 ± 0.011	1.04128	0.0169778	1
Phosphatidylcholine O-40:6	4.15 ± 0.012	3.74 ± 0.012	1.10947	1.14996e-07	5.71531e-05
Phosphatidylcholine O-42:1	0.35 ± 0.011	0.33 ± 0.012	1.0661	0.00053455	0.265671
Phosphatidylcholine O-42:2	0.47 ± 0.011	0.42 ± 0.012	1.11756	4.67168e-09	2.32182e-06
Phosphatidylcholine O-42:3	0.7 ± 0.012	0.63 ± 0.012	1.1115	5.93923e-08	2.9518e-05
Phosphatidylcholine O-42:4	0.73 ± 0.012	0.69 ± 0.013	1.05397	0.00901522	1
Phosphatidylcholine O-42:5	1.67 ± 0.01	1.6 ± 0.011	1.04427	0.00914172	1
Phosphatidylcholine O-44:3	0.12 ± 0.013	0.11 ± 0.013	1.04799	0.0265322	1
Phosphatidylcholine O-44:4	0.25 ± 0.016	0.24 ± 0.017	1.04084	0.130928	1
Phosphatidylcholine O-44:5	1.17 ± 0.013	1.13 ± 0.013	1.03917	0.0656203	1
Phosphatidylcholine O-44:6	1.1 ± 0.013	1.05 ± 0.013	1.05352	0.0125625	1
Sphingomyelin 33:1	5.67 ± 0.012	4.79 ± 0.012	1.1833	2.77178e-17	1.37757e-14
Sphingomyelin 35:1	3.12 ± 0.011	2.67 ± 0.012	1.16864	1.40131e-15	6.96451e-13
Sphingomyelin 41:1	10.94 ± 0.012	9.3 ± 0.012	1.17623	1.30159e-16	6.46889e-14
Sphingomyelin 41:2	8.64 ± 0.011	6.69 ± 0.012	1.29182	7.80142e-39	3.87731e-36
Sphingomyelin 43:1	0.99 ± 0.012	0.89 ± 0.013	1.11188	3.19304e-07	0.000158694
Sphingomyelin 34:1	104.25 ± 0.008	93.75 ± 0.009	1.11206	4.65491e-14	2.31349e-11
Sphingomyelin 34:2	15.77 ± 0.009	12.96 ± 0.01	1.21664	1.51893e-34	7.54909e-32
Sphingomyelin 36:1	20.46 ± 0.012	17.38 ± 0.012	1.17686	2.77286e-16	1.37811e-13
Sphingomyelin 36:2	10.35 ± 0.012	8.3 ± 0.013	1.24722	1.44403e-25	7.17685e-23
Sphingomyelin 38:3	0.41 ± 0.015	0.32 ± 0.016	1.28939	9.83107e-24	4.88604e-21
Sphingomyelin 42:1	16.79 ± 0.011	15.61 ± 0.012	1.07557	0.0001196	0.0594413
Sphingomyelin 42:2	36.39 ± 0.01	32 ± 0.011	1.13733	7.356e-14	3.65593e-11
Sphingomyelin 44:1	0.13 ± 0.014	0.12 ± 0.015	1.08495	0.000361002	0.179418
Sphingomyelin 44:2	0.27 ± 0.014	0.24 ± 0.015	1.11543	2.05319e-06	0.00102043
Hexose	4681.7 ± 0.009	4942.27 ± 0.01	0.947276	0.000379162	0.188444
Cholesteryl ester 14:0	14.16 ± 0.021	12.5 ± 0.022	1.13299	0.000291776	0.145013
Cholesteryl ester 15:0	5.34 ± 0.02	4.73 ± 0.021	1.12983	0.000238883	0.118725
Cholesteryl ester 16:0	185.35 ± 0.012	176.08 ± 0.012	1.05261	0.00767125	1
Cholesteryl ester 16:1	41.1 ± 0.023	34.59 ± 0.024	1.18827	4.72159e-06	0.00234663
Cholesteryl ester 17:0	4.56 ± 0.022	4.28 ± 0.023	1.06638	0.0725245	1
Cholesteryl ester 17:1	2.87 ± 0.021	2.57 ± 0.022	1.11643	0.00169881	0.844308
Cholesteryl ester 18:0	12.58 ± 0.013	12.09 ± 0.013	1.03986	0.0609023	1
Cholesteryl ester 18:1	275.61 ± 0.015	254.49 ± 0.016	1.08295	0.00178073	0.885021
Cholesteryl ester 18:2	1299.05 ± 0.012	1180.19 ± 0.013	1.1007	3.07031e-06	0.00152595
Cholesteryl ester 18:3	56.33 ± 0.018	49.4 ± 0.019	1.14029	1.59494e-05	0.00792686
Cholesteryl ester 20:3	20.04 ± 0.017	18.54 ± 0.018	1.08094	0.0046471	1
Cholesteryl ester 20:4	243.68 ± 0.015	227.24 ± 0.016	1.07235	0.00540684	1
Cholesteryl ester 20:5	64.95 ± 0.029	55.46 ± 0.031	1.17118	0.0012875	0.639887
Cholesteryl ester 22:5	2.43 ± 0.016	2.31 ± 0.017	1.05255	0.0502417	1
Cholesteryl ester 22:6	42.36 ± 0.019	36.12 ± 0.02	1.17287	3.53117e-07	0.000175499
Ceramide d16:1/18:0	0.06 ± 0.04	0.05 ± 0.042	1.19816	0.00675507	1
Ceramide d16:1/20:0	0.1 ± 0.026	0.08 ± 0.028	1.23263	1.69566e-06	0.000842744
Ceramide d16:1/22:0	0.34 ± 0.021	0.28 ± 0.022	1.19554	2.87326e-07	0.000142801
Ceramide d16:1/23:0	0.16 ± 0.024	0.13 ± 0.025	1.24345	4.48179e-08	2.22745e-05
Ceramide d16:1/24:0	0.24 ± 0.019	0.21 ± 0.02	1.13072	0.000113209	0.0562649
Ceramide d18:1/14:0	0.06 ± 0.028	0.05 ± 0.029	1.16442	0.000933715	0.464056
Ceramide d18:1/16:0	0.5 ± 0.01	0.48 ± 0.011	1.05404	0.0015023	0.746643
Ceramide d18:1/18:0	0.19 ± 0.013	0.18 ± 0.014	1.05641	0.0101257	1
Ceramide d18:1/20:0-OH	0.28 ± 0.035	0.26 ± 0.037	1.0759	0.202048	1
Ceramide d18:1/20:0	0.14 ± 0.013	0.14 ± 0.014	1.02099	0.346453	1
Ceramide d18:1/22:0	0.91 ± 0.012	0.87 ± 0.013	1.04318	0.0347488	1
Ceramide d18:1/23:0	1.04 ± 0.014	0.92 ± 0.014	1.12488	2.55564e-07	0.000127015
Ceramide d18:1/24:0	2.66 ± 0.013	2.58 ± 0.014	1.03056	0.165304	1
Ceramide d18:1/24:1	1.18 ± 0.011	1.09 ± 0.012	1.07926	5.36656e-05	0.0266718
Ceramide d18:1/25:0	0.49 ± 0.014	0.42 ± 0.015	1.17048	2.41402e-11	1.19977e-08
Ceramide d18:1/26:0	0.1 ± 0.022	0.09 ± 0.024	1.1328	0.000825632	0.410339
Ceramide d18:1/26:1	0.03 ± 0.022	0.03 ± 0.024	1.15127	0.000169574	0.0842782
Ceramide d18:2/16:0	0.12 ± 0.012	0.11 ± 0.013	1.14158	2.34535e-10	1.16564e-07
Ceramide d18:2/18:0	0.09 ± 0.018	0.08 ± 0.019	1.14902	2.63556e-06	0.00130987
Ceramide d18:2/20:0	0.08 ± 0.018	0.07 ± 0.019	1.14152	6.94271e-06	0.00345053
Ceramide d18:2/22:0	0.31 ± 0.014	0.26 ± 0.015	1.16634	3.14294e-11	1.56204e-08
Ceramide d18:2/23:0	0.15 ± 0.015	0.13 ± 0.016	1.22893	2.80377e-15	1.39347e-12
Ceramide d18:2/24:0	0.59 ± 0.015	0.52 ± 0.016	1.13566	2.20657e-07	0.000109667
Ceramide d18:2/24:1	0.25 ± 0.012	0.21 ± 0.013	1.18381	1.83022e-16	9.0962e-14
Dihydroceramide d18:0/22:0	0.08 ± 0.035	0.08 ± 0.037	0.967763	0.570723	1
Dihydroceramide d18:0/24:0	0.32 ± 0.018	0.3 ± 0.019	1.06139	0.0451484	1
Dihydroceramide d18:0/24:1	0.25 ± 0.02	0.22 ± 0.021	1.14082	5.67065e-05	0.0281831
Diacylglyceride 16:0_18:1	1.87 ± 0.03	2.19 ± 0.032	0.853842	0.00153063	0.760726
Diacylglyceride 16:0_18:2	1.47 ± 0.022	1.76 ± 0.024	0.833697	1.07357e-06	0.000533562
Diacylglyceride 16:1_18:2	0.47 ± 0.027	0.5 ± 0.028	0.940957	0.17076	1
Diacylglyceride 17:0_18:1	0.46 ± 0.023	0.42 ± 0.024	1.10036	0.0126791	1
Diacylglyceride 18:1_18:1	2.13 ± 0.021	2.33 ± 0.022	0.913386	0.0098989	1
Diacylglyceride 18:1_18:2	6.01 ± 0.02	6.89 ± 0.021	0.872206	3.46404e-05	0.0172163
Diacylglyceride 18:2_18:2	3.88 ± 0.024	4.61 ± 0.025	0.843188	1.95941e-05	0.00973828
Diacylglyceride 18:2_18:3	0.29 ± 0.036	0.31 ± 0.038	0.922957	0.177347	1
Dihexosylceramide d18:1/14:0	0.27 ± 0.019	0.23 ± 0.02	1.16068	2.72525e-06	0.00135445
Dihexosylceramide d18:1/16:0	2.99 ± 0.012	2.87 ± 0.013	1.04329	0.0327566	1
Dihexosylceramide d18:1/18:0	0.26 ± 0.013	0.24 ± 0.014	1.0684	0.00282508	1
Dihexosylceramide d18:1/20:0	0.13 ± 0.017	0.11 ± 0.018	1.15738	2.90032e-07	0.000144146
Dihexosylceramide d18:1/22:0	0.29 ± 0.015	0.25 ± 0.015	1.14496	2.66264e-08	1.32333e-05
Dihexosylceramide d18:1/24:0	0.24 ± 0.015	0.22 ± 0.016	1.09479	0.000281653	0.139981
Dihexosylceramide d18:1/24:1	0.44 ± 0.014	0.41 ± 0.015	1.07591	0.00224242	1
Trihexosylceramide d18:1/16:0	1.58 ± 0.011	1.37 ± 0.012	1.14926	4.68282e-13	2.32736e-10
Trihexosylceramide d18:1/18:0	0.17 ± 0.021	0.14 ± 0.022	1.19771	1.69245e-07	8.41149e-05
Trihexosylceramide d18:1/24:1	0.65 ± 0.016	0.54 ± 0.017	1.19992	4.25932e-11	2.11688e-08
Trihexosylceramide d18:1/26:1	0.04 ± 0.036	0.03 ± 0.038	1.17472	0.00651343	1
Trihexosylceramide d18:1/20:0	0.02 ± 0.038	0.02 ± 0.04	1.03583	0.576598	1
Trihexosylceramide d18:1/22:0	0.19 ± 0.022	0.16 ± 0.023	1.20362	3.86962e-07	0.00019232
Hexosylceramide d16:1/22:0	0.05 ± 0.026	0.04 ± 0.027	1.16287	0.000443098	0.22022
Hexosylceramide d16:1/24:0	0.04 ± 0.029	0.03 ± 0.031	1.21587	5.96205e-05	0.0296314
Hexosylceramide d18:1/16:0	1.22 ± 0.011	1.16 ± 0.012	1.0559	0.00411577	1
Hexosylceramide d18:1/18:0	0.21 ± 0.015	0.19 ± 0.016	1.05473	0.0307717	1
Hexosylceramide d18:1/18:1	0.1 ± 0.019	0.08 ± 0.02	1.17196	6.69056e-07	0.000332521
Hexosylceramide d18:1/20:0	0.29 ± 0.018	0.27 ± 0.019	1.07011	0.0214015	1
Hexosylceramide d18:1/22:0	3.27 ± 0.014	3.34 ± 0.014	0.980243	0.375556	1
Hexosylceramide d18:1/23:0	1.66 ± 0.014	1.56 ± 0.015	1.06185	0.0116645	1
Hexosylceramide d18:1/24:0	1.74 ± 0.013	1.79 ± 0.014	0.973197	0.21192	1
Hexosylceramide d18:1/24:1	4.07 ± 0.013	3.78 ± 0.014	1.07659	0.000766399	0.3809
Hexosylceramide d18:1/26:0	0.07 ± 0.035	0.06 ± 0.038	1.2356	0.000350333	0.174115
Hexosylceramide d18:2/18:0	0.03 ± 0.022	0.03 ± 0.023	1.22155	3.54517e-08	1.76195e-05
Hexosylceramide d18:2/22:0	0.67 ± 0.018	0.58 ± 0.019	1.14683	5.93092e-06	0.00294767
Hexosylceramide d18:2/23:0	0.36 ± 0.02	0.31 ± 0.021	1.17397	1.9559e-06	0.000972082
Hexosylceramide d18:2/24:0	0.86 ± 0.016	0.78 ± 0.017	1.10958	0.000102309	0.0508477
Triacylglyceride 14:0_32:2	0.61 ± 0.056	0.65 ± 0.059	0.930078	0.43437	1
Triacylglyceride 14:0_34:0	0.8 ± 0.051	0.98 ± 0.054	0.821162	0.0198509	1
Triacylglyceride 14:0_34:1	7.13 ± 0.041	8.13 ± 0.043	0.876601	0.0522539	1
Triacylglyceride 14:0_34:2	5.76 ± 0.036	6.42 ± 0.038	0.897881	0.0733322	1
Triacylglyceride 14:0_34:3	1.46 ± 0.035	1.52 ± 0.037	0.959414	0.469459	1
Triacylglyceride 14:0_35:1	0.3 ± 0.035	0.32 ± 0.037	0.938714	0.269643	1
Triacylglyceride 14:0_35:2	0.27 ± 0.045	0.31 ± 0.048	0.882678	0.0954047	1
Triacylglyceride 14:0_36:1	1.88 ± 0.038	2.14 ± 0.04	0.880058	0.0439497	1
Triacylglyceride 14:0_36:2	11.36 ± 0.029	12.33 ± 0.031	0.922073	0.0902656	1
Triacylglyceride 14:0_36:3	12.32 ± 0.027	13.74 ± 0.028	0.896921	0.0141004	1
Triacylglyceride 14:0_36:4	4.79 ± 0.028	5.47 ± 0.03	0.875535	0.00446956	1
Triacylglyceride 14:0_38:4	0.36 ± 0.035	0.4 ± 0.038	0.880812	0.031276	1
Triacylglyceride 14:0_38:5	0.42 ± 0.032	0.46 ± 0.034	0.91768	0.107399	1
Triacylglyceride 16:0_28:1	0.33 ± 0.058	0.38 ± 0.062	0.863659	0.130109	1
Triacylglyceride 16:0_28:2	0.23 ± 0.046	0.26 ± 0.048	0.887812	0.115887	1
Triacylglyceride 16:0_30:2	0.89 ± 0.046	0.97 ± 0.049	0.912939	0.237478	1
Triacylglyceride 16:0_32:0	5.33 ± 0.051	7.07 ± 0.054	0.753938	0.000928967	0.461697
Triacylglyceride 16:0_32:1	11.85 ± 0.043	13.48 ± 0.046	0.878844	0.0708092	1
Triacylglyceride 16:0_32:2	6.79 ± 0.038	7.61 ± 0.04	0.892451	0.0722358	1
Triacylglyceride 16:0_32:3	1.22 ± 0.037	1.28 ± 0.04	0.953134	0.440523	1
Triacylglyceride 16:0_33:1	1.91 ± 0.037	2.22 ± 0.04	0.863329	0.0183785	1
Triacylglyceride 16:0_33:2	1.11 ± 0.036	1.29 ± 0.038	0.859659	0.012358	1
Triacylglyceride 16:0_34:0	6.53 ± 0.04	8.32 ± 0.042	0.784967	0.00024894	0.123723
Triacylglyceride 16:0_34:1	54.46 ± 0.033	65.92 ± 0.035	0.826049	0.000446154	0.221738
Triacylglyceride 16:0_34:2	55.3 ± 0.029	64.37 ± 0.031	0.859091	0.00196375	0.975985
Triacylglyceride 16:0_34:3	17.44 ± 0.029	18.72 ± 0.03	0.931379	0.136476	1
Triacylglyceride 16:0_34:4	1.83 ± 0.03	1.93 ± 0.031	0.948877	0.285071	1
Triacylglyceride 16:0_35:1	1.72 ± 0.035	1.97 ± 0.038	0.872398	0.0207022	1
Triacylglyceride 16:0_35:2	2.92 ± 0.03	3.3 ± 0.032	0.883872	0.0129991	1
Triacylglyceride 16:0_35:3	1.46 ± 0.026	1.67 ± 0.028	0.875713	0.00260145	1
Triacylglyceride 16:0_36:2	139.22 ± 0.024	155.6 ± 0.025	0.894771	0.00447642	1
Triacylglyceride 16:0_36:3	169.94 ± 0.021	195.05 ± 0.023	0.871252	0.000117777	0.058535
Triacylglyceride 16:0_36:4	67.58 ± 0.024	79.51 ± 0.025	0.850035	3.74187e-05	0.0185971
Triacylglyceride 16:0_36:5	8.6 ± 0.025	9.81 ± 0.027	0.876314	0.00179936	0.894282
Triacylglyceride 16:0_36:6	0.8 ± 0.028	0.85 ± 0.03	0.940709	0.190545	1
Triacylglyceride 16:0_37:3	0.47 ± 0.04	0.58 ± 0.043	0.81668	0.00257871	1
Triacylglyceride 16:0_38:1	0.45 ± 0.035	0.51 ± 0.037	0.892567	0.0481141	1
Triacylglyceride 16:0_38:2	1.59 ± 0.025	1.8 ± 0.026	0.879171	0.00166713	0.828563
Triacylglyceride 16:0_38:3	2.95 ± 0.024	3.54 ± 0.025	0.832634	3.7782e-06	0.00187776
Triacylglyceride 16:0_38:4	3.88 ± 0.024	4.66 ± 0.026	0.832122	7.18855e-06	0.00357271
Triacylglyceride 16:0_38:5	4.51 ± 0.024	5.23 ± 0.025	0.862976	0.000180827	0.0898709
Triacylglyceride 16:0_38:6	2.92 ± 0.024	3.27 ± 0.025	0.892629	0.00392479	1
Triacylglyceride 16:0_38:7	0.78 ± 0.034	0.83 ± 0.036	0.941482	0.279917	1
Triacylglyceride 16:0_40:6	2.62 ± 0.022	3.07 ± 0.024	0.852769	2.22664e-05	0.0110664
Triacylglyceride 16:0_40:7	2.85 ± 0.025	3.13 ± 0.027	0.910017	0.0256269	1
Triacylglyceride 16:0_40:8	1.31 ± 0.03	1.38 ± 0.031	0.946402	0.263535	1
Triacylglyceride 16:1_28:0	0.18 ± 0.049	0.17 ± 0.052	1.01106	0.89219	1
Triacylglyceride 16:1_30:1	0.43 ± 0.055	0.38 ± 0.058	1.12804	0.183539	1
Triacylglyceride 16:1_32:0	2.19 ± 0.046	2.45 ± 0.049	0.894817	0.144631	1
Triacylglyceride 16:1_32:1	3.36 ± 0.047	3.28 ± 0.05	1.02455	0.755343	1
Triacylglyceride 16:1_32:2	1.45 ± 0.039	1.49 ± 0.041	0.978598	0.738359	1
Triacylglyceride 16:1_33:1	0.61 ± 0.033	0.6 ± 0.035	1.01321	0.812349	1
Triacylglyceride 16:1_34:0	2.24 ± 0.042	2.48 ± 0.044	0.903796	0.144029	1
Triacylglyceride 16:1_34:1	21.04 ± 0.033	21.69 ± 0.035	0.970096	0.576954	1
Triacylglyceride 16:1_34:2	16.14 ± 0.029	16.59 ± 0.031	0.973135	0.576599	1
Triacylglyceride 16:1_34:3	3.52 ± 0.029	3.42 ± 0.031	1.03071	0.533174	1
Triacylglyceride 16:1_36:1	3.3 ± 0.026	3.48 ± 0.028	0.948421	0.219226	1
Triacylglyceride 16:1_36:2	19.1 ± 0.023	19.67 ± 0.025	0.970983	0.449611	1
Triacylglyceride 16:1_36:3	21.84 ± 0.023	23.16 ± 0.024	0.943128	0.118404	1
Triacylglyceride 16:1_36:4	8.6 ± 0.024	9.24 ± 0.026	0.93084	0.0765019	1
Triacylglyceride 16:1_36:5	1.45 ± 0.025	1.48 ± 0.027	0.983444	0.691056	1
Triacylglyceride 16:1_38:3	0.52 ± 0.022	0.56 ± 0.024	0.929397	0.0474665	1
Triacylglyceride 16:1_38:4	0.73 ± 0.024	0.77 ± 0.026	0.951268	0.212337	1
Triacylglyceride 16:1_38:5	0.89 ± 0.024	0.9 ± 0.025	0.992587	0.849054	1
Triacylglyceride 17:0_32:1	0.28 ± 0.046	0.31 ± 0.049	0.886967	0.117623	1
Triacylglyceride 17:0_34:1	1.62 ± 0.031	1.79 ± 0.033	0.901633	0.0428577	1
Triacylglyceride 17:0_34:2	1.57 ± 0.024	1.66 ± 0.025	0.944948	0.155502	1
Triacylglyceride 17:0_34:3	0.47 ± 0.03	0.47 ± 0.032	1.00118	0.981156	1
Triacylglyceride 17:0_36:3	3.16 ± 0.021	3.41 ± 0.022	0.928491	0.0314321	1
Triacylglyceride 17:0_36:4	1.4 ± 0.022	1.51 ± 0.023	0.927577	0.0368046	1
Triacylglyceride 17:1_32:1	0.37 ± 0.049	0.37 ± 0.052	0.987359	0.875568	1
Triacylglyceride 17:1_34:1	1.93 ± 0.031	2.13 ± 0.033	0.907427	0.0622728	1
Triacylglyceride 17:1_34:2	1.47 ± 0.027	1.61 ± 0.028	0.91468	0.0440355	1
Triacylglyceride 17:1_34:3	0.39 ± 0.034	0.42 ± 0.035	0.934309	0.221959	1
Triacylglyceride 17:1_36:3	1.53 ± 0.021	1.65 ± 0.022	0.923639	0.0199411	1
Triacylglyceride 17:1_36:4	0.69 ± 0.022	0.75 ± 0.023	0.912566	0.0121566	1
Triacylglyceride 17:1_36:5	0.19 ± 0.033	0.2 ± 0.035	0.942448	0.284815	1
Triacylglyceride 17:2_34:2	0.29 ± 0.023	0.31 ± 0.025	0.930415	0.063695	1
Triacylglyceride 17:2_34:3	0.15 ± 0.033	0.17 ± 0.035	0.88701	0.0305301	1
Triacylglyceride 17:2_36:2	0.31 ± 0.022	0.33 ± 0.023	0.932397	0.0529946	1
Triacylglyceride 17:2_36:3	0.33 ± 0.022	0.36 ± 0.024	0.922329	0.0285986	1
Triacylglyceride 17:2_36:4	0.4 ± 0.02	0.43 ± 0.021	0.92749	0.02188	1
Triacylglyceride 17:2_38:5	0.15 ± 0.026	0.15 ± 0.027	1.01593	0.709844	1
Triacylglyceride 17:2_38:6	0.22 ± 0.029	0.23 ± 0.031	0.956248	0.353412	1
Triacylglyceride 17:2_38:7	0.04 ± 0.036	0.05 ± 0.038	0.871552	0.0222325	1
Triacylglyceride 18:0_30:0	0.41 ± 0.048	0.51 ± 0.05	0.815387	0.00983673	1
Triacylglyceride 18:0_30:1	0.24 ± 0.059	0.28 ± 0.062	0.837061	0.068183	1
Triacylglyceride 18:0_32:0	1.15 ± 0.054	1.53 ± 0.057	0.749314	0.00122593	0.60929
Triacylglyceride 18:0_32:1	1.61 ± 0.043	1.86 ± 0.046	0.861621	0.0387292	1
Triacylglyceride 18:0_32:2	0.75 ± 0.045	0.9 ± 0.048	0.829702	0.0123605	1
Triacylglyceride 18:0_34:2	6.65 ± 0.029	8.03 ± 0.031	0.827445	9.20744e-05	0.045761
Triacylglyceride 18:0_34:3	1.58 ± 0.025	1.74 ± 0.027	0.908777	0.0229432	1
Triacylglyceride 18:0_36:1	0.5 ± 0.048	0.62 ± 0.051	0.812827	0.00942926	1
Triacylglyceride 18:0_36:2	9.96 ± 0.025	11.09 ± 0.027	0.898251	0.0103203	1
Triacylglyceride 18:0_36:3	13.48 ± 0.02	15.06 ± 0.021	0.895197	0.000975234	0.484691
Triacylglyceride 18:0_36:4	6.57 ± 0.022	7.41 ± 0.024	0.887522	0.00142953	0.710475
Triacylglyceride 18:0_36:5	1.05 ± 0.022	1.1 ± 0.024	0.952961	0.190932	1
Triacylglyceride 18:0_38:6	1.18 ± 0.019	1.2 ± 0.021	0.985201	0.64479	1
Triacylglyceride 18:0_38:7	0.31 ± 0.026	0.3 ± 0.028	1.03514	0.424484	1
Triacylglyceride 18:1_26:0	0.31 ± 0.06	0.35 ± 0.064	0.87651	0.186007	1
Triacylglyceride 18:1_28:1	0.6 ± 0.053	0.64 ± 0.056	0.937594	0.462303	1
Triacylglyceride 18:1_30:0	8.77 ± 0.041	9.93 ± 0.043	0.883363	0.0672505	1
Triacylglyceride 18:1_30:1	5.79 ± 0.039	5.73 ± 0.042	1.01065	0.871018	1
Triacylglyceride 18:1_30:2	1.79 ± 0.035	1.83 ± 0.038	0.978548	0.71235	1
Triacylglyceride 18:1_31:0	1.29 ± 0.046	1.54 ± 0.049	0.836702	0.0195701	1
Triacylglyceride 18:1_32:0	32.87 ± 0.032	39.59 ± 0.034	0.830133	0.000497775	0.247394
Triacylglyceride 18:1_32:1	43.79 ± 0.03	45.73 ± 0.032	0.957735	0.385538	1
Triacylglyceride 18:1_32:2	15.34 ± 0.026	16.64 ± 0.028	0.921872	0.0594629	1
Triacylglyceride 18:1_32:3	1.99 ± 0.026	2.09 ± 0.027	0.949555	0.224288	1
Triacylglyceride 18:1_33:0	1.91 ± 0.034	2.17 ± 0.035	0.879511	0.0212065	1
Triacylglyceride 18:1_33:1	6 ± 0.027	6.48 ± 0.029	0.926645	0.0883633	1
Triacylglyceride 18:1_33:2	2.86 ± 0.022	3.16 ± 0.023	0.907041	0.00805566	1
Triacylglyceride 18:1_33:3	0.54 ± 0.02	0.56 ± 0.021	0.964543	0.271842	1
Triacylglyceride 18:1_34:1	232.95 ± 0.024	258.24 ± 0.025	0.902088	0.00841641	1
Triacylglyceride 18:1_34:2	178.98 ± 0.021	201.75 ± 0.022	0.88717	0.000656256	0.326159
Triacylglyceride 18:1_34:3	30.92 ± 0.022	33.37 ± 0.023	0.926557	0.0331865	1
Triacylglyceride 18:1_34:4	3.22 ± 0.023	3.37 ± 0.024	0.957221	0.242513	1
Triacylglyceride 18:1_35:2	4.54 ± 0.021	4.94 ± 0.023	0.918349	0.0170083	1
Triacylglyceride 18:1_35:3	1.57 ± 0.02	1.72 ± 0.022	0.916804	0.0103598	1
Triacylglyceride 18:1_36:0	1.7 ± 0.04	2.15 ± 0.042	0.79273	0.000490351	0.243704
Triacylglyceride 18:1_36:1	23.26 ± 0.023	25.4 ± 0.024	0.915561	0.02171	1
Triacylglyceride 18:1_36:2	85.25 ± 0.022	91.22 ± 0.024	0.934561	0.0693918	1
Triacylglyceride 18:1_36:3	89.33 ± 0.022	98.6 ± 0.023	0.906021	0.00593802	1
Triacylglyceride 18:1_36:4	35.17 ± 0.023	39.88 ± 0.025	0.881862	0.00116235	0.577687
Triacylglyceride 18:1_36:5	7.78 ± 0.025	8.52 ± 0.026	0.91343	0.0285896	1
Triacylglyceride 18:1_36:6	0.96 ± 0.026	0.97 ± 0.027	0.989801	0.810135	1
Triacylglyceride 18:1_38:5	5.68 ± 0.018	6.1 ± 0.019	0.930755	0.0144946	1
Triacylglyceride 18:1_38:6	3.69 ± 0.02	3.76 ± 0.021	0.982501	0.586546	1
Triacylglyceride 18:1_38:7	1 ± 0.025	0.96 ± 0.026	1.03686	0.377032	1
Triacylglyceride 18:2_28:0	0.92 ± 0.05	1.06 ± 0.053	0.866896	0.0883148	1
Triacylglyceride 18:2_30:0	5.32 ± 0.036	6.28 ± 0.038	0.847181	0.00578504	1
Triacylglyceride 18:2_30:1	3.25 ± 0.035	3.37 ± 0.037	0.964638	0.538759	1
Triacylglyceride 18:2_31:0	0.41 ± 0.046	0.53 ± 0.048	0.769396	0.000560342	0.27849
Triacylglyceride 18:2_32:0	22.26 ± 0.028	27.88 ± 0.03	0.798716	1.95264e-06	0.000970463
Triacylglyceride 18:2_32:1	26.02 ± 0.026	27.98 ± 0.028	0.930194	0.0944934	1
Triacylglyceride 18:2_32:2	8.86 ± 0.027	9.91 ± 0.028	0.893922	0.0114863	1
Triacylglyceride 18:2_33:0	1.28 ± 0.027	1.5 ± 0.029	0.85469	0.000530709	0.263763
Triacylglyceride 18:2_33:1	3.69 ± 0.023	4.13 ± 0.025	0.8923	0.00313554	1
Triacylglyceride 18:2_33:2	1.77 ± 0.023	2 ± 0.025	0.884701	0.00160449	0.797432
Triacylglyceride 18:2_34:0	18.17 ± 0.023	21.42 ± 0.024	0.848185	1.36961e-05	0.00680694
Triacylglyceride 18:2_34:1	155.48 ± 0.021	178.21 ± 0.023	0.872428	0.000121608	0.0604392
Triacylglyceride 18:2_34:2	108.13 ± 0.024	126.26 ± 0.025	0.856356	8.03191e-05	0.0399186
Triacylglyceride 18:2_34:3	17.24 ± 0.025	19.27 ± 0.027	0.894541	0.00755185	1
Triacylglyceride 18:2_34:4	1.82 ± 0.026	1.97 ± 0.027	0.925764	0.0730072	1
Triacylglyceride 18:2_35:1	3.26 ± 0.021	3.58 ± 0.022	0.911852	0.00870066	1
Triacylglyceride 18:2_35:2	2.82 ± 0.021	3.16 ± 0.023	0.894036	0.00168658	0.838229
Triacylglyceride 18:2_35:3	0.93 ± 0.023	1.05 ± 0.024	0.885994	0.00135731	0.674583
Triacylglyceride 18:2_36:0	1.73 ± 0.025	2 ± 0.026	0.865542	0.000440449	0.218903
Triacylglyceride 18:2_36:1	16.06 ± 0.02	18.05 ± 0.021	0.889917	0.000478712	0.23792
Triacylglyceride 18:2_36:2	51.25 ± 0.021	57.61 ± 0.023	0.889659	0.00105524	0.524453
Triacylglyceride 18:2_36:3	43.85 ± 0.026	51.13 ± 0.027	0.857683	0.000355864	0.176864
Triacylglyceride 18:2_36:4	18.59 ± 0.03	21.94 ± 0.031	0.847192	0.000768834	0.38211
Triacylglyceride 18:2_36:5	4.25 ± 0.032	4.81 ± 0.034	0.883141	0.0210134	1
Triacylglyceride 18:2_38:4	2.57 ± 0.02	2.86 ± 0.021	0.898122	0.00129682	0.64452
Triacylglyceride 18:2_38:5	3.62 ± 0.02	4.03 ± 0.021	0.898459	0.00103032	0.512067
Triacylglyceride 18:2_38:6	2.25 ± 0.023	2.35 ± 0.025	0.957203	0.261582	1
Triacylglyceride 18:3_30:0	0.59 ± 0.043	0.66 ± 0.046	0.890553	0.10815	1
Triacylglyceride 18:3_32:0	2.36 ± 0.031	2.81 ± 0.033	0.841034	0.00070954	0.352642
Triacylglyceride 18:3_32:1	2.94 ± 0.029	3.04 ± 0.031	0.968401	0.511462	1
Triacylglyceride 18:3_34:0	2.05 ± 0.024	2.34 ± 0.025	0.873742	0.000666366	0.331184
Triacylglyceride 18:3_34:1	17.28 ± 0.023	19.26 ± 0.024	0.896859	0.0037656	1
Triacylglyceride 18:3_34:2	11.53 ± 0.024	12.72 ± 0.026	0.906466	0.0149145	1
Triacylglyceride 18:3_34:3	2.03 ± 0.026	2.13 ± 0.028	0.955625	0.299436	1
Triacylglyceride 18:3_35:2	0.44 ± 0.024	0.47 ± 0.025	0.944053	0.149241	1
Triacylglyceride 18:3_36:1	2.06 ± 0.022	2.25 ± 0.023	0.918302	0.0171545	1
Triacylglyceride 18:3_36:2	8.09 ± 0.023	8.68 ± 0.024	0.931353	0.0604621	1
Triacylglyceride 18:3_36:3	7.89 ± 0.027	8.7 ± 0.029	0.90622	0.0298642	1
Triacylglyceride 18:3_36:4	3.04 ± 0.032	3.38 ± 0.034	0.899461	0.0440471	1
Triacylglyceride 18:3_38:5	0.65 ± 0.022	0.65 ± 0.024	1.0049	0.895785	1
Triacylglyceride 18:3_38:6	0.42 ± 0.027	0.41 ± 0.028	1.03582	0.424775	1
Triacylglyceride 20:0_32:3	0.47 ± 0.022	0.53 ± 0.023	0.880477	0.000409625	0.203584
Triacylglyceride 20:0_32:4	0.5 ± 0.024	0.6 ± 0.026	0.839896	1.46095e-05	0.00726093
Triacylglyceride 20:0_34:1	0.57 ± 0.034	0.6 ± 0.036	0.947196	0.331446	1
Triacylglyceride 20:1_32:1	0.31 ± 0.042	0.35 ± 0.045	0.88993	0.0967333	1
Triacylglyceride 20:1_32:2	0.34 ± 0.022	0.37 ± 0.023	0.936309	0.0662397	1
Triacylglyceride 20:1_32:3	0.23 ± 0.025	0.24 ± 0.026	0.942167	0.149704	1
Triacylglyceride 20:1_34:0	0.15 ± 0.039	0.18 ± 0.042	0.860058	0.0213979	1
Triacylglyceride 20:1_34:1	1.44 ± 0.026	1.62 ± 0.027	0.890429	0.00688911	1
Triacylglyceride 20:1_34:2	1.22 ± 0.022	1.38 ± 0.024	0.884433	0.000969325	0.481754
Triacylglyceride 20:1_34:3	0.28 ± 0.027	0.3 ± 0.029	0.927345	0.0980279	1
Triacylglyceride 20:2_32:0	0.32 ± 0.042	0.37 ± 0.045	0.867921	0.0433813	1
Triacylglyceride 20:2_32:1	0.58 ± 0.029	0.63 ± 0.031	0.927936	0.118462	1
Triacylglyceride 20:2_34:1	1.9 ± 0.024	2.25 ± 0.026	0.845954	3.47161e-05	0.0172539
Triacylglyceride 20:2_34:2	1.56 ± 0.023	1.81 ± 0.024	0.859719	8.17235e-05	0.0406166
Triacylglyceride 20:2_34:3	0.4 ± 0.024	0.45 ± 0.025	0.898496	0.00705627	1
Triacylglyceride 20:2_34:4	0.03 ± 0.052	0.03 ± 0.055	0.940264	0.47458	1
Triacylglyceride 20:2_36:5	0.08 ± 0.035	0.08 ± 0.037	1.00438	0.939457	1
Triacylglyceride 20:3_32:0	0.6 ± 0.037	0.73 ± 0.039	0.823801	0.00147289	0.732027
Triacylglyceride 20:3_32:1	0.79 ± 0.031	0.86 ± 0.033	0.913734	0.0844946	1
Triacylglyceride 20:3_32:2	0.34 ± 0.037	0.37 ± 0.039	0.926618	0.212812	1
Triacylglyceride 20:3_34:0	0.48 ± 0.03	0.55 ± 0.031	0.881608	0.0105919	1
Triacylglyceride 20:3_34:1	3.53 ± 0.026	4.06 ± 0.028	0.869829	0.00126322	0.627818
Triacylglyceride 20:3_34:2	2.79 ± 0.024	3.19 ± 0.026	0.876855	0.0010734	0.533479
Triacylglyceride 20:3_34:3	0.62 ± 0.024	0.66 ± 0.026	0.938388	0.111757	1
Triacylglyceride 20:3_36:3	1.71 ± 0.02	1.8 ± 0.021	0.95037	0.118891	1
Triacylglyceride 20:3_36:4	0.85 ± 0.021	0.88 ± 0.022	0.962201	0.260933	1
Triacylglyceride 20:3_36:5	0.35 ± 0.023	0.33 ± 0.025	1.07885	0.0483721	1
Triacylglyceride 20:4_30:0	0.36 ± 0.056	0.44 ± 0.06	0.815654	0.0292493	1
Triacylglyceride 20:4_32:0	1.64 ± 0.035	1.92 ± 0.037	0.85418	0.00688251	1
Triacylglyceride 20:4_32:1	1.78 ± 0.033	1.83 ± 0.035	0.976092	0.659	1
Triacylglyceride 20:4_32:2	0.71 ± 0.031	0.71 ± 0.033	0.989074	0.830595	1
Triacylglyceride 20:4_33:2	0.21 ± 0.035	0.21 ± 0.037	0.988668	0.842284	1
Triacylglyceride 20:4_34:0	1.4 ± 0.026	1.6 ± 0.028	0.874613	0.00224743	1
Triacylglyceride 20:4_34:1	10.22 ± 0.024	11.27 ± 0.026	0.906423	0.0142887	1
Triacylglyceride 20:4_34:2	8.16 ± 0.023	8.91 ± 0.025	0.916088	0.0237265	1
Triacylglyceride 20:4_34:3	1.5 ± 0.023	1.51 ± 0.025	0.988711	0.76845	1
Triacylglyceride 20:4_35:3	0.05 ± 0.042	0.05 ± 0.045	1.01279	0.855967	1
Triacylglyceride 20:4_36:2	7.76 ± 0.018	7.93 ± 0.019	0.97865	0.459217	1
Triacylglyceride 20:4_36:3	6.31 ± 0.019	6.44 ± 0.02	0.979145	0.493498	1
Triacylglyceride 20:4_36:4	2.81 ± 0.022	2.86 ± 0.023	0.98053	0.591634	1
Triacylglyceride 20:4_36:5	0.76 ± 0.027	0.73 ± 0.029	1.04032	0.38001	1
Triacylglyceride 20:5_34:0	0.41 ± 0.036	0.46 ± 0.038	0.886775	0.0423535	1
Triacylglyceride 20:5_34:1	2.56 ± 0.031	2.86 ± 0.032	0.89542	0.0301789	1
Triacylglyceride 20:5_34:2	2.03 ± 0.031	2.24 ± 0.032	0.906463	0.0538425	1
Triacylglyceride 20:5_36:2	1.68 ± 0.029	1.75 ± 0.031	0.959562	0.392032	1
Triacylglyceride 20:5_36:3	1.68 ± 0.033	1.75 ± 0.035	0.958381	0.438927	1
Triacylglyceride 22:2_32:4	0.01 ± 0.036	0.02 ± 0.038	0.88659	0.0427658	1
Triacylglyceride 22:4_32:0	0.18 ± 0.044	0.23 ± 0.047	0.774807	0.000540954	0.268854
Triacylglyceride 22:4_32:2	0.11 ± 0.042	0.11 ± 0.044	0.967484	0.634301	1
Triacylglyceride 22:4_34:2	0.88 ± 0.026	1.03 ± 0.027	0.861499	0.000459232	0.228238
Triacylglyceride 22:5_32:0	0.58 ± 0.032	0.68 ± 0.034	0.84852	0.00240086	1
Triacylglyceride 22:5_32:1	0.67 ± 0.029	0.69 ± 0.03	0.970357	0.527013	1
Triacylglyceride 22:5_34:1	3.77 ± 0.022	4.27 ± 0.023	0.881601	0.000619977	0.308128
Triacylglyceride 22:5_34:2	3.16 ± 0.021	3.54 ± 0.023	0.892289	0.00131126	0.651697
Triacylglyceride 22:5_34:3	0.64 ± 0.022	0.66 ± 0.024	0.966978	0.363161	1
Triacylglyceride 22:6_32:0	1.09 ± 0.038	1.19 ± 0.04	0.920758	0.188184	1
Triacylglyceride 22:6_32:1	1.24 ± 0.037	1.19 ± 0.039	1.03922	0.52834	1
Triacylglyceride 22:6_34:1	6.27 ± 0.032	6.36 ± 0.034	0.986051	0.793038	1
Triacylglyceride 22:6_34:2	5.36 ± 0.032	5.42 ± 0.034	0.987563	0.816083	1
Triacylglyceride 22:6_34:3	1.15 ± 0.034	1.08 ± 0.036	1.06391	0.275179	1
