# Supplementary material for: Human Metabolome Reference Database in a Biracial Cohort across the Adult Lifespan
Source: Metabolites. 2023 Apr 25;13(5):591. doi: 10.3390/metabo13050591 (PMC10221446; doi:10.3390/metabo13050591)
Supplement: Supplementary file 1 [file metabolites-13-00591-s001.zip › Supplementary Table S4. Racial differences for all metabolites.xlsx]

## Sheet: Group comparison
Metabolite	White Mean ± 95% CI adjusted by age and gender	Black Mean ± 95% CI adjusted by age and gender	Fold change Black or African American vs. White or Caucasian adjusted by age and gender	p.value Black or African American vs. White or Caucasian adjusted by age and gender	q.value Black or African American vs. White or Caucasian adjusted by age and gender
Alanine	401.4 ± 0.01	410.5 ± 0.012	1.02268	0.2235	1
Arginine	56.04 ± 0.015	72.88 ± 0.019	1.30043	1.81197e-19	9.0055e-17
Asparagine	55.74 ± 0.008	56.63 ± 0.01	1.01601	0.306322	1
Aspartic Acid	7.7 ± 0.021	7.25 ± 0.026	0.941429	0.11826	1
Cysteine	69.14 ± 0.009	74.11 ± 0.011	1.07201	3.22425e-05	0.0160245
Glutamine	682.69 ± 0.007	688.84 ± 0.008	1.00901	0.45391	1
Glutamic Acid	58.03 ± 0.017	63 ± 0.021	1.08569	0.00926263	1
Glycine	296.09 ± 0.011	299.72 ± 0.014	1.01226	0.549499	1
Histidine	92.81 ± 0.007	92.68 ± 0.008	0.998647	0.911339	1
Isoleucine	76.7 ± 0.009	82.41 ± 0.011	1.07442	2.10268e-05	0.0104503
Leucine	138.32 ± 0.008	144.56 ± 0.01	1.04513	0.00416574	1
Lysine	203.92 ± 0.008	197.55 ± 0.009	0.968734	0.021457	1
Methionine	27.4 ± 0.008	30.87 ± 0.01	1.12648	1.01447e-14	5.0419e-12
Phenylalanine	66.93 ± 0.007	67.19 ± 0.008	1.00399	0.743873	1
Proline	195.42 ± 0.011	200.23 ± 0.014	1.02465	0.242718	1
Serine	107.56 ± 0.009	110.48 ± 0.011	1.02715	0.110471	1
Threonine	138.15 ± 0.01	152.29 ± 0.012	1.10235	3.75002e-08	1.86376e-05
Tryptophan	61.81 ± 0.009	61.61 ± 0.011	0.996704	0.83907	1
Tyrosine	71.85 ± 0.009	77.8 ± 0.012	1.08287	4.16866e-06	0.00207182
Valine	232.1 ± 0.008	240.15 ± 0.01	1.03468	0.0156895	1
Cholic acid	0.07 ± 0.07	0.06 ± 0.087	0.815409	0.114264	1
Chenodeoxycholic acid	0.1 ± 0.063	0.09 ± 0.079	0.811066	0.0719189	1
Deoxycholic acid	0.4 ± 0.044	0.33 ± 0.054	0.817314	0.0123624	1
Glycocholic acid	0.14 ± 0.041	0.19 ± 0.05	1.41542	3.68638e-06	0.00183213
Glycochenodeoxycholic acid	0.33 ± 0.039	0.42 ± 0.048	1.26685	0.000934072	0.464234
Glycodeoxycholic acid	0.24 ± 0.05	0.27 ± 0.061	1.12578	0.192873	1
Glycolithocholic acid	0.01 ± 0.04	0.01 ± 0.05	0.907417	0.190314	1
Glycolithocholic acid sulfate	0.26 ± 0.037	0.27 ± 0.046	1.0349	0.61588	1
Glycoursodeoxycholic acid	0.05 ± 0.057	0.06 ± 0.071	1.25073	0.0330682	1
Taurocholic acid	0.02 ± 0.054	0.03 ± 0.066	1.44608	0.000186224	0.0925533
Taurochenodeoxycholic acid	0.05 ± 0.045	0.08 ± 0.056	1.58058	4.65107e-08	2.31158e-05
Taurodeoxycholic acid	0.04 ± 0.049	0.05 ± 0.061	1.43248	6.9556e-05	0.0345694
Tauro-muricholic acids	0.01 ± 0.045	0.01 ± 0.056	1.46007	6.67928e-06	0.0033196
gamma-Amino butyric acid	0.19 ± 0.009	0.19 ± 0.011	0.996804	0.843077	1
Putrescine	0.13 ± 0.024	0.1 ± 0.03	0.802392	6.23643e-07	0.00030995
Serotonin	0.07 ± 0.044	0.08 ± 0.055	1.16949	0.0533365	1
beta-Alanine	2.95 ± 0.013	3.08 ± 0.016	1.04311	0.0778035	1
Arachidonic acid (AA, omega-6-FA(20:4))	2.39 ± 0.047	2.61 ± 0.059	1.09212	0.310179	1
Docosahexaenoic acid (DHA, omega-3-FA(22:6))	6.49 ± 0.023	7.03 ± 0.029	1.08398	0.0579155	1
Eicosapentaenoic acid	0.6 ± 0.033	0.56 ± 0.041	0.934726	0.260714	1
Octadecenoic acid	192.99 ± 0.018	175.01 ± 0.023	0.906843	0.00355308	1
Octadecadienoic acid	57.49 ± 0.025	52 ± 0.032	0.904559	0.032028	1
Eicosenoic acid	2.1 ± 0.026	1.79 ± 0.032	0.851069	0.000675117	0.335533
Eicosadienoic acid	1.5 ± 0.026	1.43 ± 0.032	0.958519	0.371892	1
Eicosatrienoic acid	0.75 ± 0.029	0.64 ± 0.036	0.857067	0.00390489	1
Aconitic acid	11.65 ± 0.013	11.56 ± 0.016	0.992712	0.750879	1
Hippuric acid	5.81 ± 0.038	5.22 ± 0.047	0.897945	0.121767	1
Lactic acid	4293.09 ± 0.014	4190.6 ± 0.017	0.976128	0.348409	1
Indoleacetic acid	2.32 ± 0.019	2.09 ± 0.024	0.899408	0.00275506	1
Indolepropionic acid	0.8 ± 0.034	0.62 ± 0.043	0.77442	5.41322e-05	0.0269037
Indoxyl sulfate	6.28 ± 0.025	6.4 ± 0.031	1.01847	0.690423	1
1-Methylhistidine	5.93 ± 0.014	6.53 ± 0.017	1.10169	0.000178627	0.0887774
3-Methylhistidine	6.99 ± 0.046	8.54 ± 0.057	1.22133	0.0178714	1
5-Aminovaleric acid	0.04 ± 0.02	0.04 ± 0.025	1.14005	0.000417937	0.207715
alpha-Aminobutyric acid	18.49 ± 0.014	18.28 ± 0.017	0.988681	0.653414	1
Asymmetric dimethylarginine	0.57 ± 0.007	0.54 ± 0.009	0.948273	3.05438e-05	0.0151803
Betaine	30.26 ± 0.014	31.41 ± 0.017	1.03773	0.150496	1
Citrulline	41.13 ± 0.011	39.73 ± 0.013	0.966093	0.0808282	1
Creatinine	82.94 ± 0.009	91.39 ± 0.011	1.10186	6.13927e-09	3.05122e-06
Cystine	40.6 ± 0.019	44.39 ± 0.023	1.09344	0.00994594	1
Homoarginine	2.8 ± 0.017	3.61 ± 0.021	1.29061	1.06521e-15	5.29407e-13
Homocysteine	6.81 ± 0.012	6.87 ± 0.015	1.00795	0.716088	1
Kynurenine	2.23 ± 0.011	1.96 ± 0.013	0.879435	7.6927e-11	3.82327e-08
Methionine-Sulfoxide	0.55 ± 0.015	0.59 ± 0.019	1.06287	0.0300583	1
Ornithine	126.12 ± 0.012	106.24 ± 0.015	0.842395	7.72108e-15	3.83737e-12
Proline betaine	4.26 ± 0.056	4.45 ± 0.07	1.04476	0.671353	1
Symmetric dimethylarginine	0.62 ± 0.009	0.59 ± 0.011	0.961724	0.0158903	1
Sarcosine	4.2 ± 0.011	4.23 ± 0.013	1.00698	0.725497	1
Taurine	64.92 ± 0.014	65.02 ± 0.018	1.00151	0.953705	1
Tryptophan betaine	0.65 ± 0.05	0.36 ± 0.062	0.557348	3.69882e-10	1.83831e-07
alpha-Aminoadipic acid	0.81 ± 0.018	0.87 ± 0.023	1.06964	0.044444	1
trans-4-Hydroxyproline	11.54 ± 0.018	14.88 ± 0.022	1.28911	1.15395e-14	5.73514e-12
Trigonelline	0.46 ± 0.054	0.25 ± 0.067	0.535837	5.61116e-10	2.78875e-07
p-Cresol sulfate	41.61 ± 0.028	41.65 ± 0.035	1.00095	0.985169	1
Cortisol	0.31 ± 0.016	0.27 ± 0.02	0.862338	1.21317e-06	0.000602946
Cortisone	0.06 ± 0.015	0.06 ± 0.019	1.03503	0.223765	1
Dehydroepiandrosterone sulfate	1.41 ± 0.029	1.37 ± 0.035	0.972786	0.599122	1
Hypoxanthine	1.08 ± 0.046	1.77 ± 0.057	1.64281	8.12949e-09	4.04036e-06
Choline	14.86 ± 0.01	15.14 ± 0.012	1.01889	0.298925	1
Trimethylamine N-oxide	6.35 ± 0.035	5.82 ± 0.043	0.916781	0.174691	1
Carnitine	40.54 ± 0.01	41.86 ± 0.013	1.03255	0.0912301	1
Acetylcarnitine	5.62 ± 0.015	5.54 ± 0.018	0.985075	0.573331	1
Propionylcarnitine	0.32 ± 0.021	0.35 ± 0.026	1.09808	0.0145105	1
Butyrylcarnitine	0.18 ± 0.022	0.16 ± 0.028	0.895336	0.00709458	1
Valerylcarnitine	0.1 ± 0.023	0.12 ± 0.028	1.14818	0.0010292	0.511512
Decanoylcarnitine	0.25 ± 0.027	0.24 ± 0.033	0.958412	0.385463	1
Tetradecenoylcarnitine	0.05 ± 0.025	0.05 ± 0.031	0.993162	0.882733	1
Octadecenoylcarnitine	0.13 ± 0.025	0.12 ± 0.031	0.916324	0.0575446	1
Octadecadienoylcarnitine	0.07 ± 0.025	0.09 ± 0.031	1.17734	0.000416089	0.206796
Lysophosphatidylcholine 16:0	115.62 ± 0.01	100.6 ± 0.012	0.870042	6.68333e-14	3.32162e-11
Lysophosphatidylcholine 16:1	3.19 ± 0.013	2.35 ± 0.016	0.738415	1.05064e-32	5.22169e-30
Lysophosphatidylcholine 17:0	2.21 ± 0.013	1.88 ± 0.016	0.850941	5.54886e-12	2.75778e-09
Lysophosphatidylcholine 18:0	35.59 ± 0.011	33.41 ± 0.014	0.938544	0.00164777	0.818943
Lysophosphatidylcholine 18:1	24.34 ± 0.012	20.16 ± 0.015	0.828369	8.16658e-16	4.05879e-13
Lysophosphatidylcholine 18:2	40.04 ± 0.015	36.4 ± 0.018	0.908948	0.000495982	0.246503
Lysophosphatidylcholine 20:3	2.37 ± 0.015	1.93 ± 0.018	0.813622	1.29558e-13	6.43904e-11
Lysophosphatidylcholine 20:4	8.14 ± 0.014	8.04 ± 0.018	0.987631	0.635096	1
Lysophosphatidylcholine 24:0	0.16 ± 0.017	0.16 ± 0.021	0.996315	0.904481	1
Lysophosphatidylcholine 26:0	0.17 ± 0.029	0.15 ± 0.036	0.885898	0.0214174	1
Lysophosphatidylcholine 26:1	0.15 ± 0.024	0.16 ± 0.03	1.0959	0.0386445	1
Phosphatidylcholine 24:0	0.04 ± 0.031	0.04 ± 0.039	1.0235	0.684207	1
Phosphatidylcholine 28:1	3.44 ± 0.011	3.19 ± 0.014	0.925092	0.00023354	0.116069
Phosphatidylcholine 30:0	3.64 ± 0.014	3.21 ± 0.018	0.881405	1.3961e-06	0.000693864
Phosphatidylcholine 32:0	12.88 ± 0.01	11.8 ± 0.012	0.916099	8.62618e-07	0.000428721
Phosphatidylcholine 32:1	10.55 ± 0.021	7.16 ± 0.026	0.678492	3.30199e-22	1.64109e-19
Phosphatidylcholine 32:2	3.65 ± 0.026	2.61 ± 0.033	0.715617	1.0029e-11	4.98441e-09
Phosphatidylcholine 32:3	0.59 ± 0.011	0.61 ± 0.014	1.03565	0.0857003	1
Phosphatidylcholine 34:1	162.95 ± 0.011	139.35 ± 0.014	0.855188	6.56893e-14	3.26476e-11
Phosphatidylcholine 34:2	349.64 ± 0.008	327.26 ± 0.01	0.935989	7.68671e-06	0.0038203
Phosphatidylcholine 34:3	14.77 ± 0.012	12.57 ± 0.015	0.851386	1.87375e-12	9.31252e-10
Phosphatidylcholine 34:4	1.61 ± 0.016	1.54 ± 0.02	0.953548	0.100395	1
Phosphatidylcholine 36:0	1.33 ± 0.02	1.59 ± 0.025	1.19035	3.14344e-06	0.00156229
Phosphatidylcholine 36:1	39.01 ± 0.01	36.98 ± 0.013	0.947908	0.00406882	1
Phosphatidylcholine 36:2	209.25 ± 0.008	202.26 ± 0.01	0.966579	0.0267622	1
Phosphatidylcholine 36:3	116.76 ± 0.01	102.25 ± 0.012	0.875774	1.38744e-13	6.89556e-11
Phosphatidylcholine 36:4	169.5 ± 0.01	174.13 ± 0.013	1.02729	0.159769	1
Phosphatidylcholine 36:5	20.63 ± 0.021	18.69 ± 0.027	0.90598	0.0123724	1
Phosphatidylcholine 36:6	0.81 ± 0.018	0.76 ± 0.022	0.932975	0.0355516	1
Phosphatidylcholine 38:0	2.54 ± 0.013	2.84 ± 0.017	1.11727	6.56378e-06	0.0032622
Phosphatidylcholine 38:1	0.44 ± 0.032	0.48 ± 0.039	1.08557	0.158957	1
Phosphatidylcholine 38:3	37.16 ± 0.011	35.7 ± 0.014	0.960604	0.0472306	1
Phosphatidylcholine 38:4	94.37 ± 0.011	104.83 ± 0.014	1.11082	4.47904e-07	0.000222608
Phosphatidylcholine 38:5	46.73 ± 0.011	45.22 ± 0.014	0.967613	0.110998	1
Phosphatidylcholine 38:6	65.8 ± 0.013	67.55 ± 0.017	1.02664	0.287362	1
Phosphatidylcholine 40:2	0.25 ± 0.012	0.24 ± 0.014	0.957326	0.039618	1
Phosphatidylcholine 40:3	0.42 ± 0.01	0.41 ± 0.012	0.986627	0.462728	1
Phosphatidylcholine 40:4	2.43 ± 0.013	2.54 ± 0.016	1.04418	0.0658521	1
Phosphatidylcholine 40:5	6.76 ± 0.013	6.93 ± 0.016	1.02554	0.274627	1
Phosphatidylcholine 40:6	20.32 ± 0.014	23.02 ± 0.017	1.13246	1.06746e-06	0.00053053
Phosphatidylcholine 42:0	0.5 ± 0.012	0.47 ± 0.015	0.937241	0.00399574	1
Phosphatidylcholine 42:1	0.27 ± 0.012	0.27 ± 0.015	1.00059	0.978773	1
Phosphatidylcholine 42:2	0.22 ± 0.012	0.23 ± 0.015	1.05387	0.0200972	1
Phosphatidylcholine 42:4	0.15 ± 0.01	0.15 ± 0.012	0.988335	0.515684	1
Phosphatidylcholine 42:5	0.24 ± 0.011	0.24 ± 0.014	1.00246	0.903779	1
Phosphatidylcholine 42:6	0.36 ± 0.012	0.37 ± 0.015	1.0231	0.291886	1
Phosphatidylcholine O-28:0	0.2 ± 0.027	0.19 ± 0.033	0.912368	0.0640392	1
Phosphatidylcholine O-28:1	0.38 ± 0.016	0.34 ± 0.019	0.891236	7.18698e-05	0.0357193
Phosphatidylcholine O-30:0	0.33 ± 0.013	0.27 ± 0.017	0.827952	6.25618e-14	3.10932e-11
Phosphatidylcholine O-30:1	0.06 ± 0.051	0.06 ± 0.064	0.917602	0.36056	1
Phosphatidylcholine O-30:2	0.11 ± 0.011	0.11 ± 0.014	0.964879	0.0770072	1
Phosphatidylcholine O-32:1	2.62 ± 0.01	2.49 ± 0.013	0.949048	0.00622417	1
Phosphatidylcholine O-32:2	0.76 ± 0.011	0.74 ± 0.014	0.971001	0.144429	1
Phosphatidylcholine O-34:0	1.29 ± 0.012	1.16 ± 0.015	0.901132	1.79389e-06	0.000891563
Phosphatidylcholine O-34:1	8.6 ± 0.009	7.29 ± 0.012	0.847886	1.6927e-20	8.41273e-18
Phosphatidylcholine O-34:2	11.22 ± 0.01	10.61 ± 0.013	0.946028	0.00403373	1
Phosphatidylcholine O-34:3	8.08 ± 0.013	8.58 ± 0.016	1.06221	0.00895368	1
Phosphatidylcholine O-36:0	0.68 ± 0.012	0.69 ± 0.015	1.00518	0.813923	1
Phosphatidylcholine O-36:1	6.58 ± 0.01	5.96 ± 0.013	0.905712	1.2855e-07	6.38895e-05
Phosphatidylcholine O-36:2	12.96 ± 0.01	11.65 ± 0.012	0.898977	2.50999e-09	1.24747e-06
Phosphatidylcholine O-36:3	7.03 ± 0.01	6.66 ± 0.013	0.946461	0.00434036	1
Phosphatidylcholine O-36:4	16.13 ± 0.011	16.77 ± 0.014	1.03957	0.0652396	1
Phosphatidylcholine O-36:5	11.23 ± 0.012	12.59 ± 0.015	1.12087	7.5958e-07	0.000377511
Phosphatidylcholine O-38:0	1.89 ± 0.014	1.79 ± 0.018	0.945668	0.0328817	1
Phosphatidylcholine O-38:1	0.15 ± 0.068	0.09 ± 0.084	0.588486	2.35256e-05	0.0116922
Phosphatidylcholine O-38:2	1.61 ± 0.011	1.41 ± 0.013	0.873573	2.30972e-11	1.14793e-08
Phosphatidylcholine O-38:3	3.18 ± 0.01	2.84 ± 0.012	0.894581	6.99472e-10	3.47637e-07
Phosphatidylcholine O-38:4	11.54 ± 0.01	11.5 ± 0.013	0.996537	0.856411	1
Phosphatidylcholine O-38:5	16.57 ± 0.01	16.62 ± 0.012	1.003	0.863696	1
Phosphatidylcholine O-38:6	6.78 ± 0.012	7.41 ± 0.015	1.09268	6.85001e-05	0.0340446
Phosphatidylcholine O-40:1	1.18 ± 0.011	1.21 ± 0.014	1.02443	0.230902	1
Phosphatidylcholine O-40:2	1.49 ± 0.01	1.44 ± 0.013	0.960372	0.0348522	1
Phosphatidylcholine O-40:3	0.87 ± 0.009	0.8 ± 0.011	0.923671	1.12599e-06	0.000559619
Phosphatidylcholine O-40:4	1.99 ± 0.009	1.93 ± 0.012	0.973547	0.119604	1
Phosphatidylcholine O-40:5	3.01 ± 0.009	2.91 ± 0.012	0.966345	0.0477973	1
Phosphatidylcholine O-40:6	3.91 ± 0.011	3.97 ± 0.013	1.01549	0.437905	1
Phosphatidylcholine O-42:1	0.34 ± 0.01	0.33 ± 0.013	0.968503	0.088992	1
Phosphatidylcholine O-42:2	0.46 ± 0.01	0.43 ± 0.013	0.936604	0.000654635	0.325353
Phosphatidylcholine O-42:3	0.7 ± 0.011	0.64 ± 0.013	0.913333	4.99156e-06	0.0024808
Phosphatidylcholine O-42:4	0.76 ± 0.011	0.67 ± 0.014	0.878131	4.17313e-10	2.07405e-07
Phosphatidylcholine O-42:5	1.72 ± 0.009	1.55 ± 0.011	0.899762	7.62136e-10	3.78782e-07
Phosphatidylcholine O-44:3	0.12 ± 0.012	0.11 ± 0.015	0.919038	9.72254e-05	0.048321
Phosphatidylcholine O-44:4	0.28 ± 0.015	0.22 ± 0.018	0.777666	1.83972e-19	9.14339e-17
Phosphatidylcholine O-44:5	1.29 ± 0.012	1.03 ± 0.014	0.799863	5.48155e-24	2.72433e-21
Phosphatidylcholine O-44:6	1.14 ± 0.012	1.02 ± 0.014	0.897214	4.46559e-07	0.00022194
Sphingomyelin 33:1	5.42 ± 0.011	5.01 ± 0.013	0.92502	9.0943e-05	0.0451986
Sphingomyelin 35:1	2.88 ± 0.011	2.89 ± 0.013	1.00544	0.780577	1
Sphingomyelin 41:1	9.86 ± 0.011	10.32 ± 0.013	1.04671	0.0197298	1
Sphingomyelin 41:2	7.44 ± 0.01	7.76 ± 0.013	1.04309	0.0254072	1
Sphingomyelin 43:1	0.92 ± 0.011	0.95 ± 0.014	1.03138	0.141371	1
Sphingomyelin 34:1	97.88 ± 0.008	99.85 ± 0.01	1.02008	0.15856	1
Sphingomyelin 34:2	14.04 ± 0.008	14.56 ± 0.01	1.03698	0.0190255	1
Sphingomyelin 36:1	18.08 ± 0.011	19.67 ± 0.013	1.08819	2.30385e-05	0.0114501
Sphingomyelin 36:2	8.75 ± 0.011	9.83 ± 0.014	1.12323	3.00539e-08	1.49368e-05
Sphingomyelin 38:3	0.35 ± 0.014	0.37 ± 0.017	1.07598	0.00337684	1
Sphingomyelin 42:1	15.57 ± 0.01	16.83 ± 0.013	1.08092	5.79949e-05	0.0288235
Sphingomyelin 42:2	33.03 ± 0.009	35.25 ± 0.012	1.06715	0.00017228	0.0856232
Sphingomyelin 44:1	0.12 ± 0.013	0.13 ± 0.016	1.05099	0.0326523	1
Sphingomyelin 44:2	0.24 ± 0.013	0.26 ± 0.016	1.06033	0.0121615	1
Hexose	4610.77 ± 0.008	5018.31 ± 0.01	1.08839	6.3714e-08	3.16658e-05
Cholesteryl ester 14:0	14.92 ± 0.019	11.86 ± 0.024	0.795449	1.25086e-10	6.21677e-08
Cholesteryl ester 15:0	5.4 ± 0.018	4.67 ± 0.023	0.865538	2.15984e-05	0.0107344
Cholesteryl ester 16:0	182.69 ± 0.011	178.65 ± 0.013	0.977894	0.254127	1
Cholesteryl ester 16:1	43.66 ± 0.021	32.56 ± 0.026	0.745773	5.46808e-14	2.71764e-11
Cholesteryl ester 17:0	4.6 ± 0.02	4.24 ± 0.025	0.92154	0.025498	1
Cholesteryl ester 17:1	2.94 ± 0.019	2.5 ± 0.024	0.850322	6.60912e-06	0.00328473
Cholesteryl ester 18:0	12.56 ± 0.012	12.11 ± 0.014	0.964546	0.0900722	1
Cholesteryl ester 18:1	280.32 ± 0.014	250.21 ± 0.018	0.892598	1.38271e-05	0.00687208
Cholesteryl ester 18:2	1251.88 ± 0.011	1224.65 ± 0.014	0.978249	0.291474	1
Cholesteryl ester 18:3	54.76 ± 0.017	50.83 ± 0.021	0.928238	0.0160628	1
Cholesteryl ester 20:3	19.9 ± 0.015	18.67 ± 0.019	0.938098	0.0227577	1
Cholesteryl ester 20:4	219.31 ± 0.014	252.5 ± 0.017	1.15132	5.04077e-08	2.50526e-05
Cholesteryl ester 20:5	59.95 ± 0.027	60.08 ± 0.034	1.00205	0.967326	1
Cholesteryl ester 22:5	2.3 ± 0.015	2.43 ± 0.018	1.05625	0.0406007	1
Cholesteryl ester 22:6	36.26 ± 0.017	42.2 ± 0.021	1.16386	2.03244e-06	0.00101012
Ceramide d16:1/18:0	0.05 ± 0.037	0.05 ± 0.046	0.931304	0.295417	1
Ceramide d16:1/20:0	0.08 ± 0.024	0.09 ± 0.03	1.03003	0.503957	1
Ceramide d16:1/22:0	0.31 ± 0.019	0.3 ± 0.024	0.968969	0.370777	1
Ceramide d16:1/23:0	0.15 ± 0.022	0.14 ± 0.027	0.899957	0.00897548	1
Ceramide d16:1/24:0	0.24 ± 0.018	0.21 ± 0.022	0.876856	5.33786e-05	0.0265292
Ceramide d18:1/14:0	0.06 ± 0.026	0.05 ± 0.032	0.828339	6.29552e-05	0.0312887
Ceramide d18:1/16:0	0.49 ± 0.009	0.48 ± 0.011	0.983807	0.33345	1
Ceramide d18:1/18:0	0.18 ± 0.012	0.19 ± 0.015	1.03522	0.11176	1
Ceramide d18:1/20:0-OH	0.28 ± 0.032	0.26 ± 0.04	0.928982	0.208508	1
Ceramide d18:1/20:0	0.14 ± 0.012	0.14 ± 0.015	0.99169	0.71115	1
Ceramide d18:1/22:0	0.87 ± 0.011	0.9 ± 0.014	1.02821	0.173275	1
Ceramide d18:1/23:0	0.99 ± 0.013	0.98 ± 0.016	0.99013	0.667658	1
Ceramide d18:1/24:0	2.63 ± 0.012	2.61 ± 0.015	0.995388	0.834626	1
Ceramide d18:1/24:1	1.16 ± 0.01	1.11 ± 0.013	0.957277	0.0230462	1
Ceramide d18:1/25:0	0.45 ± 0.013	0.45 ± 0.016	1.00662	0.780741	1
Ceramide d18:1/26:0	0.09 ± 0.021	0.09 ± 0.026	1.06933	0.0775374	1
Ceramide d18:1/26:1	0.03 ± 0.021	0.03 ± 0.026	0.995152	0.89841	1
Ceramide d18:2/16:0	0.11 ± 0.011	0.11 ± 0.014	0.990261	0.641725	1
Ceramide d18:2/18:0	0.08 ± 0.016	0.09 ± 0.02	1.09446	0.00267652	1
Ceramide d18:2/20:0	0.07 ± 0.016	0.07 ± 0.02	1.06193	0.0444498	1
Ceramide d18:2/22:0	0.28 ± 0.013	0.29 ± 0.016	1.0093	0.690917	1
Ceramide d18:2/23:0	0.14 ± 0.014	0.14 ± 0.018	0.950421	0.0512834	1
Ceramide d18:2/24:0	0.57 ± 0.014	0.54 ± 0.017	0.942803	0.0179533	1
Ceramide d18:2/24:1	0.23 ± 0.011	0.22 ± 0.014	0.96278	0.0635857	1
Dihydroceramide d18:0/22:0	0.07 ± 0.032	0.08 ± 0.04	1.11964	0.0558711	1
Dihydroceramide d18:0/24:0	0.3 ± 0.017	0.33 ± 0.021	1.10788	0.000769958	0.382669
Dihydroceramide d18:0/24:1	0.22 ± 0.018	0.24 ± 0.022	1.09393	0.00704252	1
Diacylglyceride 16:0_18:1	2.26 ± 0.028	1.82 ± 0.034	0.803532	1.85566e-05	0.00922261
Diacylglyceride 16:0_18:2	1.67 ± 0.021	1.55 ± 0.026	0.923285	0.0348272	1
Diacylglyceride 16:1_18:2	0.53 ± 0.025	0.46 ± 0.031	0.865078	0.00145249	0.721886
Diacylglyceride 17:0_18:1	0.43 ± 0.021	0.46 ± 0.026	1.06325	0.117126	1
Diacylglyceride 18:1_18:1	2.48 ± 0.02	2 ± 0.024	0.806682	3.11007e-09	1.5457e-06
Diacylglyceride 18:1_18:2	6.68 ± 0.018	6.19 ± 0.023	0.926601	0.0232093	1
Diacylglyceride 18:2_18:2	4.05 ± 0.022	4.42 ± 0.027	1.0898	0.034181	1
Diacylglyceride 18:2_18:3	0.28 ± 0.033	0.31 ± 0.041	1.09742	0.125779	1
Dihexosylceramide d18:1/14:0	0.27 ± 0.018	0.24 ± 0.022	0.876566	4.73954e-05	0.0235555
Dihexosylceramide d18:1/16:0	3.01 ± 0.011	2.85 ± 0.014	0.947181	0.00750344	1
Dihexosylceramide d18:1/18:0	0.24 ± 0.012	0.26 ± 0.015	1.10507	1.09338e-05	0.0054341
Dihexosylceramide d18:1/20:0	0.11 ± 0.016	0.13 ± 0.019	1.16656	1.22169e-07	6.07182e-05
Dihexosylceramide d18:1/22:0	0.26 ± 0.013	0.28 ± 0.017	1.06774	0.00781879	1
Dihexosylceramide d18:1/24:0	0.23 ± 0.014	0.23 ± 0.017	1.02609	0.309902	1
Dihexosylceramide d18:1/24:1	0.44 ± 0.013	0.41 ± 0.016	0.934032	0.00523337	1
Trihexosylceramide d18:1/16:0	1.45 ± 0.011	1.49 ± 0.013	1.03262	0.0961341	1
Trihexosylceramide d18:1/18:0	0.15 ± 0.019	0.16 ± 0.024	1.07164	0.0476402	1
Trihexosylceramide d18:1/24:1	0.57 ± 0.015	0.61 ± 0.019	1.0733	0.0110811	1
Trihexosylceramide d18:1/26:1	0.04 ± 0.033	0.04 ± 0.041	1.13173	0.0404373	1
Trihexosylceramide d18:1/20:0	0.02 ± 0.035	0.02 ± 0.044	0.969945	0.635627	1
Trihexosylceramide d18:1/22:0	0.17 ± 0.02	0.18 ± 0.025	1.07179	0.0609595	1
Hexosylceramide d16:1/22:0	0.05 ± 0.024	0.04 ± 0.03	0.818289	5.19395e-06	0.00258139
Hexosylceramide d16:1/24:0	0.04 ± 0.027	0.03 ± 0.033	0.874686	0.00691915	1
Hexosylceramide d18:1/16:0	1.17 ± 0.011	1.2 ± 0.013	1.02554	0.191772	1
Hexosylceramide d18:1/18:0	0.19 ± 0.014	0.21 ± 0.017	1.05879	0.0233982	1
Hexosylceramide d18:1/18:1	0.09 ± 0.018	0.1 ± 0.022	1.1364	8.34459e-05	0.0414726
Hexosylceramide d18:1/20:0	0.28 ± 0.016	0.29 ± 0.02	1.00785	0.794631	1
Hexosylceramide d18:1/22:0	3.3 ± 0.013	3.31 ± 0.016	1.00419	0.855788	1
Hexosylceramide d18:1/23:0	1.63 ± 0.013	1.58 ± 0.016	0.970925	0.223951	1
Hexosylceramide d18:1/24:0	1.76 ± 0.012	1.77 ± 0.015	1.00696	0.754892	1
Hexosylceramide d18:1/24:1	3.88 ± 0.012	3.97 ± 0.015	1.02502	0.268261	1
Hexosylceramide d18:1/26:0	0.07 ± 0.033	0.06 ± 0.041	0.85679	0.0103855	1
Hexosylceramide d18:2/18:0	0.03 ± 0.02	0.03 ± 0.025	0.993093	0.850112	1
Hexosylceramide d18:2/22:0	0.61 ± 0.017	0.64 ± 0.021	1.04691	0.135331	1
Hexosylceramide d18:2/23:0	0.33 ± 0.019	0.33 ± 0.023	0.985747	0.674246	1
Hexosylceramide d18:2/24:0	0.82 ± 0.015	0.82 ± 0.018	1.00224	0.93451	1
Triacylglyceride 14:0_32:2	0.74 ± 0.052	0.53 ± 0.064	0.719265	0.000530872	0.263843
Triacylglyceride 14:0_34:0	1.04 ± 0.047	0.75 ± 0.058	0.721991	0.000171427	0.0851993
Triacylglyceride 14:0_34:1	9 ± 0.038	6.44 ± 0.047	0.715411	1.60122e-06	0.000795807
Triacylglyceride 14:0_34:2	7.01 ± 0.033	5.28 ± 0.041	0.754083	5.01165e-06	0.00249079
Triacylglyceride 14:0_34:3	1.76 ± 0.032	1.26 ± 0.04	0.716244	1.70749e-08	8.48621e-06
Triacylglyceride 14:0_35:1	0.35 ± 0.032	0.27 ± 0.04	0.768551	7.90815e-06	0.00393035
Triacylglyceride 14:0_35:2	0.34 ± 0.042	0.25 ± 0.052	0.711434	9.5688e-06	0.00475569
Triacylglyceride 14:0_36:1	2.34 ± 0.035	1.72 ± 0.044	0.735773	2.5364e-06	0.00126059
Triacylglyceride 14:0_36:2	13.58 ± 0.027	10.32 ± 0.033	0.760027	2.823e-08	1.40303e-05
Triacylglyceride 14:0_36:3	13.91 ± 0.025	12.17 ± 0.031	0.874464	0.00307325	1
Triacylglyceride 14:0_36:4	5.14 ± 0.026	5.09 ± 0.032	0.989765	0.828956	1
Triacylglyceride 14:0_38:4	0.41 ± 0.033	0.35 ± 0.041	0.857297	0.010586	1
Triacylglyceride 14:0_38:5	0.46 ± 0.03	0.42 ± 0.037	0.926237	0.159667	1
Triacylglyceride 16:0_28:1	0.42 ± 0.054	0.3 ± 0.067	0.713837	0.000682354	0.33913
Triacylglyceride 16:0_28:2	0.26 ± 0.042	0.23 ± 0.052	0.886311	0.118487	1
Triacylglyceride 16:0_30:2	1 ± 0.043	0.86 ± 0.053	0.858332	0.0526302	1
Triacylglyceride 16:0_32:0	7.27 ± 0.047	5.18 ± 0.059	0.712403	0.000101856	0.0506227
Triacylglyceride 16:0_32:1	15.38 ± 0.04	10.38 ± 0.049	0.67522	9.85989e-08	4.90036e-05
Triacylglyceride 16:0_32:2	8.38 ± 0.035	6.17 ± 0.044	0.736139	2.53347e-06	0.00125914
Triacylglyceride 16:0_32:3	1.44 ± 0.035	1.08 ± 0.043	0.750973	7.69791e-06	0.00382586
Triacylglyceride 16:0_33:1	2.51 ± 0.035	1.69 ± 0.043	0.672144	6.97641e-10	3.46728e-07
Triacylglyceride 16:0_33:2	1.44 ± 0.034	1 ± 0.042	0.695286	5.64518e-09	2.80566e-06
Triacylglyceride 16:0_34:0	8.39 ± 0.037	6.48 ± 0.045	0.772758	0.000135089	0.0671391
Triacylglyceride 16:0_34:1	67.61 ± 0.03	53.1 ± 0.037	0.785296	1.44338e-05	0.00717358
Triacylglyceride 16:0_34:2	67.32 ± 0.027	52.87 ± 0.034	0.785408	1.61567e-06	0.000802989
Triacylglyceride 16:0_34:3	20.87 ± 0.027	15.64 ± 0.033	0.749588	5.1593e-09	2.56417e-06
Triacylglyceride 16:0_34:4	2.08 ± 0.027	1.7 ± 0.034	0.818168	6.8641e-05	0.0341146
Triacylglyceride 16:0_35:1	2.15 ± 0.033	1.58 ± 0.041	0.735285	4.10805e-07	0.00020417
Triacylglyceride 16:0_35:2	3.56 ± 0.028	2.71 ± 0.034	0.760511	8.86103e-08	4.40393e-05
Triacylglyceride 16:0_35:3	1.72 ± 0.024	1.42 ± 0.03	0.827532	2.7644e-05	0.0137391
Triacylglyceride 16:0_36:2	162.78 ± 0.022	133.08 ± 0.027	0.817584	5.4611e-07	0.000271416
Triacylglyceride 16:0_36:3	188.57 ± 0.02	175.78 ± 0.025	0.93217	0.053724	1
Triacylglyceride 16:0_36:4	71.41 ± 0.022	75.25 ± 0.027	1.05389	0.189788	1
Triacylglyceride 16:0_36:5	9.01 ± 0.023	9.37 ± 0.029	1.03917	0.372283	1
Triacylglyceride 16:0_36:6	0.83 ± 0.026	0.82 ± 0.032	0.98366	0.729633	1
Triacylglyceride 16:0_37:3	0.54 ± 0.037	0.51 ± 0.046	0.952015	0.472303	1
Triacylglyceride 16:0_38:1	0.53 ± 0.032	0.43 ± 0.04	0.808081	0.000299653	0.148927
Triacylglyceride 16:0_38:2	1.89 ± 0.023	1.52 ± 0.028	0.804055	2.2154e-07	0.000110105
Triacylglyceride 16:0_38:3	3.43 ± 0.022	3.04 ± 0.027	0.885976	0.00265436	1
Triacylglyceride 16:0_38:4	4.42 ± 0.023	4.09 ± 0.028	0.926202	0.0651656	1
Triacylglyceride 16:0_38:5	4.87 ± 0.022	4.85 ± 0.027	0.995737	0.914932	1
Triacylglyceride 16:0_38:6	2.97 ± 0.022	3.2 ± 0.027	1.07629	0.0671039	1
Triacylglyceride 16:0_38:7	0.8 ± 0.031	0.82 ± 0.039	1.02409	0.676182	1
Triacylglyceride 16:0_40:6	3.02 ± 0.021	2.66 ± 0.026	0.88287	0.00112889	0.561059
Triacylglyceride 16:0_40:7	3.02 ± 0.023	2.95 ± 0.029	0.97565	0.567197	1
Triacylglyceride 16:0_40:8	1.27 ± 0.027	1.42 ± 0.034	1.12079	0.0236631	1
Triacylglyceride 16:1_28:0	0.21 ± 0.045	0.15 ± 0.056	0.715087	5.81679e-05	0.0289094
Triacylglyceride 16:1_30:1	0.56 ± 0.05	0.3 ± 0.063	0.530242	1.50957e-11	7.50255e-09
Triacylglyceride 16:1_32:0	2.94 ± 0.042	1.83 ± 0.053	0.623203	1.95241e-09	9.70349e-07
Triacylglyceride 16:1_32:1	4.59 ± 0.043	2.4 ± 0.054	0.52152	1.26297e-15	6.27695e-13
Triacylglyceride 16:1_32:2	1.88 ± 0.036	1.15 ± 0.045	0.611077	2.85719e-13	1.42002e-10
Triacylglyceride 16:1_33:1	0.78 ± 0.031	0.47 ± 0.038	0.602105	2.44033e-18	1.21284e-15
Triacylglyceride 16:1_34:0	3.07 ± 0.039	1.81 ± 0.048	0.590366	2.61453e-13	1.29942e-10
Triacylglyceride 16:1_34:1	26.62 ± 0.03	17.14 ± 0.038	0.643865	9.333e-15	4.6385e-12
Triacylglyceride 16:1_34:2	19.77 ± 0.027	13.54 ± 0.034	0.684886	9.64326e-14	4.7927e-11
Triacylglyceride 16:1_34:3	4.22 ± 0.027	2.85 ± 0.034	0.674664	8.20912e-15	4.07993e-12
Triacylglyceride 16:1_36:1	3.95 ± 0.024	2.92 ± 0.03	0.738895	1.35735e-11	6.74602e-09
Triacylglyceride 16:1_36:2	22.71 ± 0.022	16.54 ± 0.027	0.728229	6.31016e-15	3.13615e-12
Triacylglyceride 16:1_36:3	24.58 ± 0.021	20.58 ± 0.026	0.837245	4.10406e-06	0.00203972
Triacylglyceride 16:1_36:4	9.12 ± 0.023	8.71 ± 0.028	0.954305	0.257422	1
Triacylglyceride 16:1_36:5	1.52 ± 0.023	1.42 ± 0.029	0.931445	0.0982256	1
Triacylglyceride 16:1_38:3	0.6 ± 0.021	0.48 ± 0.025	0.801783	6.96783e-09	3.46301e-06
Triacylglyceride 16:1_38:4	0.83 ± 0.022	0.68 ± 0.028	0.821905	1.96999e-06	0.000979084
Triacylglyceride 16:1_38:5	0.94 ± 0.022	0.85 ± 0.027	0.909587	0.0178643	1
Triacylglyceride 17:0_32:1	0.37 ± 0.043	0.24 ± 0.053	0.642933	2.36945e-08	1.17762e-05
Triacylglyceride 17:0_34:1	1.93 ± 0.028	1.5 ± 0.035	0.773844	1.09527e-06	0.000544351
Triacylglyceride 17:0_34:2	1.78 ± 0.022	1.46 ± 0.028	0.817077	8.61527e-07	0.000428179
Triacylglyceride 17:0_34:3	0.53 ± 0.028	0.42 ± 0.034	0.780557	1.40598e-06	0.000698773
Triacylglyceride 17:0_36:3	3.46 ± 0.019	3.11 ± 0.024	0.899864	0.00278297	1
Triacylglyceride 17:0_36:4	1.43 ± 0.02	1.48 ± 0.025	1.03183	0.393615	1
Triacylglyceride 17:1_32:1	0.48 ± 0.045	0.29 ± 0.056	0.597794	9.60815e-10	4.77525e-07
Triacylglyceride 17:1_34:1	2.41 ± 0.029	1.71 ± 0.036	0.707325	1.39206e-10	6.91853e-08
Triacylglyceride 17:1_34:2	1.75 ± 0.025	1.36 ± 0.031	0.778801	4.38907e-08	2.18137e-05
Triacylglyceride 17:1_34:3	0.47 ± 0.031	0.35 ± 0.038	0.741529	1.85738e-07	9.23119e-05
Triacylglyceride 17:1_36:3	1.71 ± 0.019	1.48 ± 0.024	0.864397	3.1561e-05	0.0156858
Triacylglyceride 17:1_36:4	0.72 ± 0.02	0.72 ± 0.025	0.996338	0.921411	1
Triacylglyceride 17:1_36:5	0.19 ± 0.031	0.2 ± 0.038	1.02023	0.723381	1
Triacylglyceride 17:2_34:2	0.31 ± 0.022	0.29 ± 0.027	0.940949	0.125374	1
Triacylglyceride 17:2_34:3	0.17 ± 0.031	0.14 ± 0.038	0.819024	0.000437649	0.217512
Triacylglyceride 17:2_36:2	0.33 ± 0.02	0.31 ± 0.025	0.938692	0.086763	1
Triacylglyceride 17:2_36:3	0.34 ± 0.021	0.35 ± 0.025	1.01887	0.619648	1
Triacylglyceride 17:2_36:4	0.43 ± 0.018	0.4 ± 0.023	0.922608	0.0163426	1
Triacylglyceride 17:2_38:5	0.15 ± 0.024	0.15 ± 0.029	0.969128	0.470005	1
Triacylglyceride 17:2_38:6	0.22 ± 0.027	0.23 ± 0.033	1.0344	0.49216	1
Triacylglyceride 17:2_38:7	0.05 ± 0.033	0.05 ± 0.041	1.01866	0.763013	1
Triacylglyceride 18:0_30:0	0.51 ± 0.044	0.41 ± 0.054	0.795372	0.0046022	1
Triacylglyceride 18:0_30:1	0.29 ± 0.054	0.23 ± 0.067	0.790507	0.0183733	1
Triacylglyceride 18:0_32:0	1.49 ± 0.05	1.18 ± 0.061	0.789506	0.00944821	1
Triacylglyceride 18:0_32:1	2 ± 0.04	1.5 ± 0.05	0.751392	0.000109562	0.0544522
Triacylglyceride 18:0_32:2	0.91 ± 0.041	0.75 ± 0.051	0.828798	0.0137551	1
Triacylglyceride 18:0_34:2	7.47 ± 0.027	7.15 ± 0.033	0.956842	0.370021	1
Triacylglyceride 18:0_34:3	1.76 ± 0.023	1.56 ± 0.029	0.8875	0.00551139	1
Triacylglyceride 18:0_36:1	0.57 ± 0.044	0.55 ± 0.055	0.966894	0.678967	1
Triacylglyceride 18:0_36:2	10.69 ± 0.023	10.33 ± 0.029	0.966422	0.423141	1
Triacylglyceride 18:0_36:3	14.06 ± 0.019	14.44 ± 0.023	1.02701	0.435323	1
Triacylglyceride 18:0_36:4	6.55 ± 0.021	7.43 ± 0.026	1.13452	0.00096389	0.479053
Triacylglyceride 18:0_36:5	1.03 ± 0.021	1.12 ± 0.025	1.08415	0.0319689	1
Triacylglyceride 18:0_38:6	1.11 ± 0.018	1.28 ± 0.022	1.14459	4.83242e-05	0.0240171
Triacylglyceride 18:0_38:7	0.29 ± 0.024	0.32 ± 0.03	1.10214	0.0279289	1
Triacylglyceride 18:1_26:0	0.38 ± 0.055	0.29 ± 0.069	0.756502	0.00623217	1
Triacylglyceride 18:1_28:1	0.76 ± 0.049	0.51 ± 0.061	0.664802	6.00286e-06	0.00298342
Triacylglyceride 18:1_30:0	11.1 ± 0.038	7.85 ± 0.047	0.707162	6.81454e-07	0.000338683
Triacylglyceride 18:1_30:1	7.12 ± 0.036	4.65 ± 0.045	0.652917	2.86063e-10	1.42174e-07
Triacylglyceride 18:1_30:2	1.93 ± 0.033	1.69 ± 0.041	0.87507	0.0265923	1
Triacylglyceride 18:1_31:0	1.78 ± 0.042	1.12 ± 0.053	0.630218	4.7354e-09	2.35349e-06
Triacylglyceride 18:1_32:0	41.14 ± 0.03	31.63 ± 0.037	0.768781	1.62219e-06	0.000806227
Triacylglyceride 18:1_32:1	54.52 ± 0.028	36.73 ± 0.034	0.6737	2.76934e-14	1.37636e-11
Triacylglyceride 18:1_32:2	17.9 ± 0.024	14.27 ± 0.03	0.79711	3.37183e-07	0.00016758
Triacylglyceride 18:1_32:3	2.18 ± 0.024	1.91 ± 0.029	0.877686	0.00278545	1
Triacylglyceride 18:1_33:0	2.4 ± 0.031	1.73 ± 0.038	0.718902	9.43982e-09	4.69159e-06
Triacylglyceride 18:1_33:1	7.47 ± 0.025	5.21 ± 0.031	0.697403	1.08345e-14	5.38474e-12
Triacylglyceride 18:1_33:2	3.39 ± 0.02	2.67 ± 0.025	0.788076	3.89987e-10	1.93824e-07
Triacylglyceride 18:1_33:3	0.58 ± 0.018	0.52 ± 0.023	0.896496	0.00117536	0.584153
Triacylglyceride 18:1_34:1	273.32 ± 0.022	220.1 ± 0.027	0.805293	7.54754e-08	3.75113e-05
Triacylglyceride 18:1_34:2	202.04 ± 0.019	178.73 ± 0.024	0.884628	0.000636537	0.316359
Triacylglyceride 18:1_34:3	34.71 ± 0.02	29.72 ± 0.025	0.856326	2.45148e-05	0.0121838
Triacylglyceride 18:1_34:4	3.51 ± 0.021	3.09 ± 0.026	0.880783	0.000931067	0.46274
Triacylglyceride 18:1_35:2	5.22 ± 0.02	4.29 ± 0.025	0.822622	1.08454e-07	5.39017e-05
Triacylglyceride 18:1_35:3	1.77 ± 0.019	1.53 ± 0.023	0.865318	3.1367e-05	0.0155894
Triacylglyceride 18:1_36:0	2.06 ± 0.037	1.78 ± 0.046	0.865606	0.0334651	1
Triacylglyceride 18:1_36:1	25.63 ± 0.021	23.05 ± 0.026	0.899425	0.00697263	1
Triacylglyceride 18:1_36:2	95.65 ± 0.021	81.29 ± 0.026	0.849927	2.15496e-05	0.0107101
Triacylglyceride 18:1_36:3	96.14 ± 0.02	91.61 ± 0.025	0.952884	0.186864	1
Triacylglyceride 18:1_36:4	36.67 ± 0.021	38.25 ± 0.027	1.04311	0.284145	1
Triacylglyceride 18:1_36:5	7.99 ± 0.023	8.3 ± 0.029	1.03817	0.374628	1
Triacylglyceride 18:1_36:6	0.97 ± 0.024	0.96 ± 0.029	0.993524	0.881486	1
Triacylglyceride 18:1_38:5	6.07 ± 0.016	5.7 ± 0.02	0.939641	0.0377329	1
Triacylglyceride 18:1_38:6	3.64 ± 0.018	3.81 ± 0.022	1.04724	0.164118	1
Triacylglyceride 18:1_38:7	0.94 ± 0.023	1.02 ± 0.028	1.07879	0.0702768	1
Triacylglyceride 18:2_28:0	1.07 ± 0.047	0.91 ± 0.058	0.854085	0.0654542	1
Triacylglyceride 18:2_30:0	6.33 ± 0.033	5.28 ± 0.041	0.834381	0.00319204	1
Triacylglyceride 18:2_30:1	3.77 ± 0.033	2.9 ± 0.04	0.769454	1.35555e-05	0.00673706
Triacylglyceride 18:2_31:0	0.49 ± 0.042	0.43 ± 0.052	0.883965	0.110807	1
Triacylglyceride 18:2_32:0	26.22 ± 0.026	23.67 ± 0.032	0.902951	0.033175	1
Triacylglyceride 18:2_32:1	30.4 ± 0.024	23.95 ± 0.03	0.788011	9.32985e-08	4.63693e-05
Triacylglyceride 18:2_32:2	9.63 ± 0.025	9.12 ± 0.031	0.946708	0.22604	1
Triacylglyceride 18:2_33:0	1.5 ± 0.025	1.28 ± 0.031	0.85171	0.000525539	0.261193
Triacylglyceride 18:2_33:1	4.34 ± 0.021	3.51 ± 0.027	0.808201	8.09749e-08	4.02445e-05
Triacylglyceride 18:2_33:2	1.95 ± 0.022	1.82 ± 0.027	0.932246	0.0761712	1
Triacylglyceride 18:2_34:0	20.27 ± 0.021	19.2 ± 0.026	0.947113	0.157476	1
Triacylglyceride 18:2_34:1	172.05 ± 0.02	161.04 ± 0.024	0.936015	0.0671905	1
Triacylglyceride 18:2_34:2	114.36 ± 0.022	119.38 ± 0.027	1.04395	0.28168	1
Triacylglyceride 18:2_34:3	18.11 ± 0.023	18.34 ± 0.029	1.01296	0.761912	1
Triacylglyceride 18:2_34:4	1.86 ± 0.024	1.93 ± 0.03	1.03629	0.41687	1
Triacylglyceride 18:2_35:1	3.58 ± 0.02	3.25 ± 0.024	0.907368	0.00682525	1
Triacylglyceride 18:2_35:2	3.03 ± 0.02	2.94 ± 0.025	0.971294	0.422457	1
Triacylglyceride 18:2_35:3	0.98 ± 0.021	0.99 ± 0.026	1.00746	0.846732	1
Triacylglyceride 18:2_36:0	1.82 ± 0.023	1.91 ± 0.028	1.05104	0.233655	1
Triacylglyceride 18:2_36:1	16.98 ± 0.019	17.08 ± 0.023	1.00574	0.866169	1
Triacylglyceride 18:2_36:2	54.5 ± 0.02	54.17 ± 0.025	0.993959	0.867503	1
Triacylglyceride 18:2_36:3	45.07 ± 0.024	49.74 ± 0.03	1.10357	0.0244289	1
Triacylglyceride 18:2_36:4	18.33 ± 0.027	22.24 ± 0.034	1.21328	0.000125818	0.0625313
Triacylglyceride 18:2_36:5	4.11 ± 0.03	4.98 ± 0.037	1.21265	0.000471408	0.23429
Triacylglyceride 18:2_38:4	2.61 ± 0.019	2.81 ± 0.023	1.07401	0.0359716	1
Triacylglyceride 18:2_38:5	3.65 ± 0.018	4 ± 0.022	1.09617	0.00580295	1
Triacylglyceride 18:2_38:6	2.06 ± 0.022	2.56 ± 0.027	1.23818	1.06253e-07	5.28076e-05
Triacylglyceride 18:3_30:0	0.69 ± 0.04	0.56 ± 0.05	0.811843	0.00475937	1
Triacylglyceride 18:3_32:0	2.71 ± 0.028	2.45 ± 0.035	0.902209	0.0481755	1
Triacylglyceride 18:3_32:1	3.4 ± 0.027	2.64 ± 0.034	0.776026	4.90161e-07	0.00024361
Triacylglyceride 18:3_34:0	2.24 ± 0.022	2.13 ± 0.027	0.951529	0.218349	1
Triacylglyceride 18:3_34:1	18.85 ± 0.021	17.66 ± 0.026	0.936684	0.087695	1
Triacylglyceride 18:3_34:2	12.06 ± 0.022	12.17 ± 0.028	1.00858	0.835425	1
Triacylglyceride 18:3_34:3	2.13 ± 0.024	2.03 ± 0.03	0.952494	0.276043	1
Triacylglyceride 18:3_35:2	0.46 ± 0.022	0.44 ± 0.028	0.956134	0.271144	1
Triacylglyceride 18:3_36:1	2.14 ± 0.02	2.16 ± 0.025	1.01037	0.777225	1
Triacylglyceride 18:3_36:2	8.58 ± 0.021	8.19 ± 0.026	0.955009	0.233787	1
Triacylglyceride 18:3_36:3	7.97 ± 0.025	8.62 ± 0.031	1.08139	0.0908987	1
Triacylglyceride 18:3_36:4	2.94 ± 0.029	3.49 ± 0.036	1.18505	0.00162146	0.805863
Triacylglyceride 18:3_38:5	0.62 ± 0.021	0.69 ± 0.026	1.11686	0.00384866	1
Triacylglyceride 18:3_38:6	0.38 ± 0.025	0.46 ± 0.03	1.21889	1.26794e-05	0.00630167
Triacylglyceride 20:0_32:3	0.51 ± 0.02	0.49 ± 0.025	0.964999	0.330853	1
Triacylglyceride 20:0_32:4	0.53 ± 0.022	0.56 ± 0.028	1.05098	0.223577	1
Triacylglyceride 20:0_34:1	0.62 ± 0.031	0.56 ± 0.039	0.904926	0.0801888	1
Triacylglyceride 20:1_32:1	0.44 ± 0.039	0.26 ± 0.048	0.587557	3.34573e-13	1.66283e-10
Triacylglyceride 20:1_32:2	0.38 ± 0.02	0.33 ± 0.025	0.882632	0.000670842	0.333409
Triacylglyceride 20:1_32:3	0.24 ± 0.023	0.23 ± 0.029	0.935301	0.113371	1
Triacylglyceride 20:1_34:0	0.19 ± 0.036	0.14 ± 0.045	0.770904	0.000107073	0.0532152
Triacylglyceride 20:1_34:1	1.72 ± 0.024	1.35 ± 0.03	0.784559	4.13703e-08	2.05611e-05
Triacylglyceride 20:1_34:2	1.39 ± 0.021	1.21 ± 0.026	0.866626	0.000169595	0.0842889
Triacylglyceride 20:1_34:3	0.33 ± 0.025	0.26 ± 0.031	0.809373	6.41043e-06	0.00318598
Triacylglyceride 20:2_32:0	0.42 ± 0.039	0.29 ± 0.048	0.692451	3.5808e-07	0.000177966
Triacylglyceride 20:2_32:1	0.69 ± 0.027	0.54 ± 0.033	0.780978	5.43538e-07	0.000270139
Triacylglyceride 20:2_34:1	2.23 ± 0.022	1.91 ± 0.028	0.856677	0.000175331	0.0871395
Triacylglyceride 20:2_34:2	1.71 ± 0.021	1.64 ± 0.026	0.959315	0.286717	1
Triacylglyceride 20:2_34:3	0.44 ± 0.022	0.41 ± 0.027	0.94456	0.159068	1
Triacylglyceride 20:2_34:4	0.03 ± 0.048	0.03 ± 0.059	0.939329	0.476877	1
Triacylglyceride 20:2_36:5	0.08 ± 0.032	0.08 ± 0.04	0.965068	0.545583	1
Triacylglyceride 20:3_32:0	0.73 ± 0.034	0.61 ± 0.042	0.836148	0.00402546	1
Triacylglyceride 20:3_32:1	0.95 ± 0.029	0.72 ± 0.036	0.755406	1.93765e-07	9.63011e-05
Triacylglyceride 20:3_32:2	0.37 ± 0.034	0.34 ± 0.042	0.918937	0.176129	1
Triacylglyceride 20:3_34:0	0.54 ± 0.027	0.49 ± 0.034	0.901073	0.0384303	1
Triacylglyceride 20:3_34:1	4.04 ± 0.024	3.55 ± 0.03	0.87938	0.00359878	1
Triacylglyceride 20:3_34:2	3.02 ± 0.022	2.95 ± 0.028	0.977205	0.572783	1
Triacylglyceride 20:3_34:3	0.64 ± 0.022	0.64 ± 0.028	1.00212	0.958615	1
Triacylglyceride 20:3_36:3	1.73 ± 0.018	1.78 ± 0.023	1.02694	0.425046	1
Triacylglyceride 20:3_36:4	0.82 ± 0.019	0.91 ± 0.024	1.11934	0.00132953	0.660774
Triacylglyceride 20:3_36:5	0.32 ± 0.021	0.36 ± 0.027	1.12884	0.00207163	1
Triacylglyceride 20:4_30:0	0.41 ± 0.052	0.39 ± 0.064	0.937374	0.497471	1
Triacylglyceride 20:4_32:0	1.76 ± 0.032	1.79 ± 0.04	1.01819	0.761641	1
Triacylglyceride 20:4_32:1	1.9 ± 0.031	1.72 ± 0.038	0.905654	0.0771657	1
Triacylglyceride 20:4_32:2	0.68 ± 0.029	0.74 ± 0.035	1.07907	0.147148	1
Triacylglyceride 20:4_33:2	0.19 ± 0.032	0.23 ± 0.04	1.20805	0.00128914	0.640701
Triacylglyceride 20:4_34:0	1.46 ± 0.024	1.52 ± 0.03	1.0407	0.371569	1
Triacylglyceride 20:4_34:1	10.46 ± 0.022	11.02 ± 0.028	1.05329	0.204274	1
Triacylglyceride 20:4_34:2	7.87 ± 0.022	9.25 ± 0.027	1.17547	4.76101e-05	0.0236622
Triacylglyceride 20:4_34:3	1.39 ± 0.021	1.63 ± 0.027	1.17291	5.68871e-05	0.0282729
Triacylglyceride 20:4_35:3	0.05 ± 0.039	0.06 ± 0.048	1.22883	0.00405885	1
Triacylglyceride 20:4_36:2	7.45 ± 0.016	8.26 ± 0.02	1.10811	0.000597842	0.297128
Triacylglyceride 20:4_36:3	5.71 ± 0.017	7.11 ± 0.021	1.24526	6.94092e-12	3.44964e-09
Triacylglyceride 20:4_36:4	2.4 ± 0.02	3.36 ± 0.025	1.39986	2.38741e-18	1.18654e-15
Triacylglyceride 20:4_36:5	0.63 ± 0.025	0.88 ± 0.031	1.38937	2.16228e-12	1.07465e-09
Triacylglyceride 20:5_34:0	0.43 ± 0.033	0.44 ± 0.041	1.01116	0.854175	1
Triacylglyceride 20:5_34:1	2.74 ± 0.028	2.67 ± 0.035	0.973918	0.61106	1
Triacylglyceride 20:5_34:2	2.06 ± 0.028	2.21 ± 0.035	1.07445	0.167254	1
Triacylglyceride 20:5_36:2	1.7 ± 0.027	1.74 ± 0.033	1.01968	0.692316	1
Triacylglyceride 20:5_36:3	1.62 ± 0.031	1.82 ± 0.038	1.12523	0.0357083	1
Triacylglyceride 22:2_32:4	0.02 ± 0.033	0.01 ± 0.041	0.94349	0.337252	1
Triacylglyceride 22:4_32:0	0.22 ± 0.041	0.19 ± 0.051	0.874134	0.0732206	1
Triacylglyceride 22:4_32:2	0.11 ± 0.039	0.11 ± 0.048	0.951403	0.482842	1
Triacylglyceride 22:4_34:2	0.94 ± 0.024	0.96 ± 0.029	1.01831	0.674986	1
Triacylglyceride 22:5_32:0	0.69 ± 0.03	0.57 ± 0.037	0.832165	0.000894679	0.444655
Triacylglyceride 22:5_32:1	0.77 ± 0.026	0.61 ± 0.033	0.792812	2.1391e-06	0.00106313
Triacylglyceride 22:5_34:1	4.36 ± 0.02	3.69 ± 0.025	0.845051	8.06959e-06	0.00401059
Triacylglyceride 22:5_34:2	3.39 ± 0.02	3.3 ± 0.024	0.97258	0.441165	1
Triacylglyceride 22:5_34:3	0.67 ± 0.021	0.63 ± 0.025	0.952649	0.198564	1
Triacylglyceride 22:6_32:0	1.18 ± 0.035	1.11 ± 0.043	0.940835	0.341091	1
Triacylglyceride 22:6_32:1	1.33 ± 0.034	1.11 ± 0.042	0.833927	0.00366218	1
Triacylglyceride 22:6_34:1	6.41 ± 0.03	6.23 ± 0.037	0.971802	0.601001	1
Triacylglyceride 22:6_34:2	5.12 ± 0.03	5.67 ± 0.037	1.10663	0.0655887	1
Triacylglyceride 22:6_34:3	1.05 ± 0.032	1.19 ± 0.039	1.13625	0.0278189	1
