# Supplementary figures and images for: Human Metabolome Reference Database in a Biracial Cohort across the Adult Lifespan
Source: MDPI journal article supplement (doi:10.3390/metabo13050591), 2023-04-25

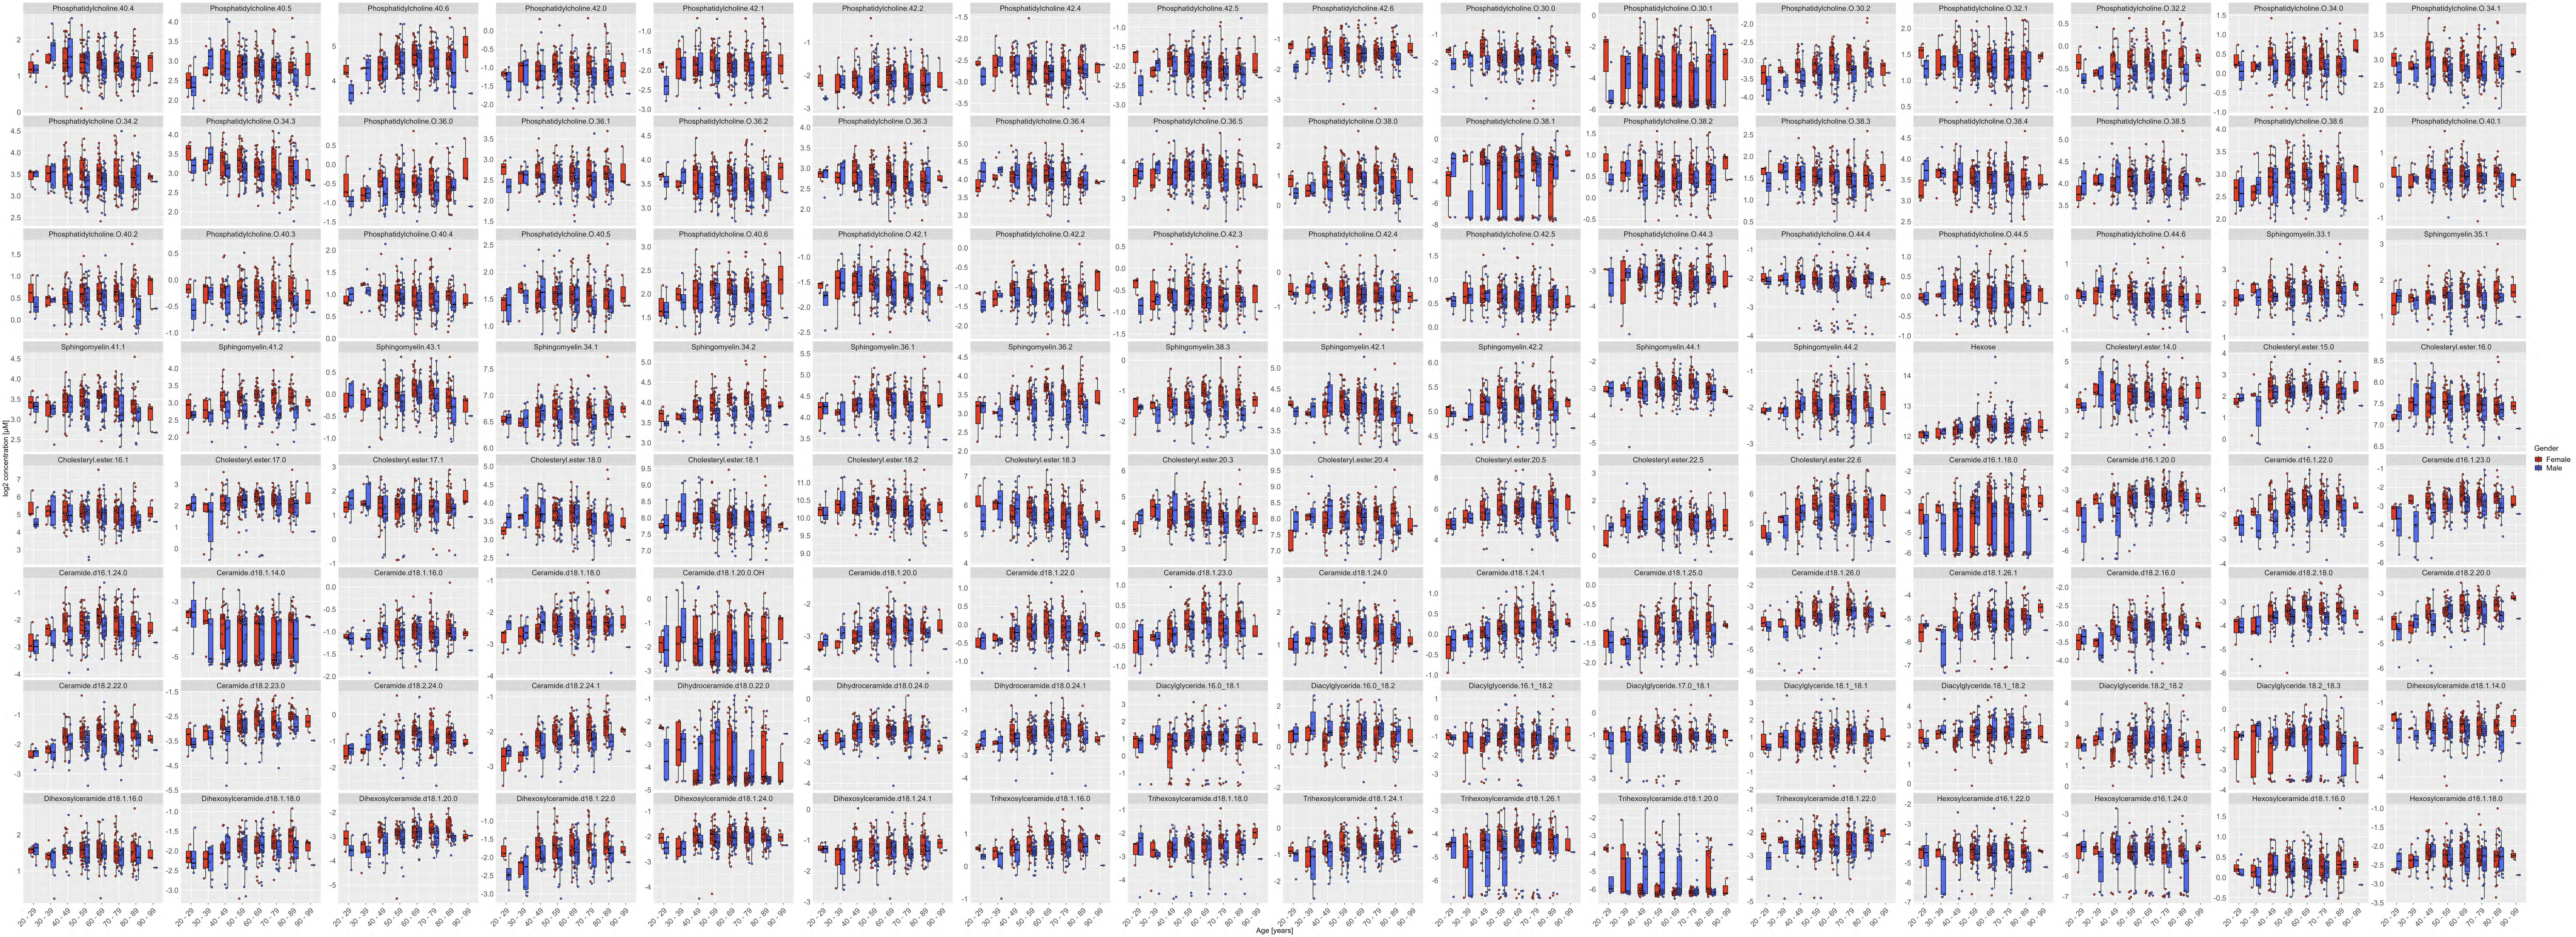







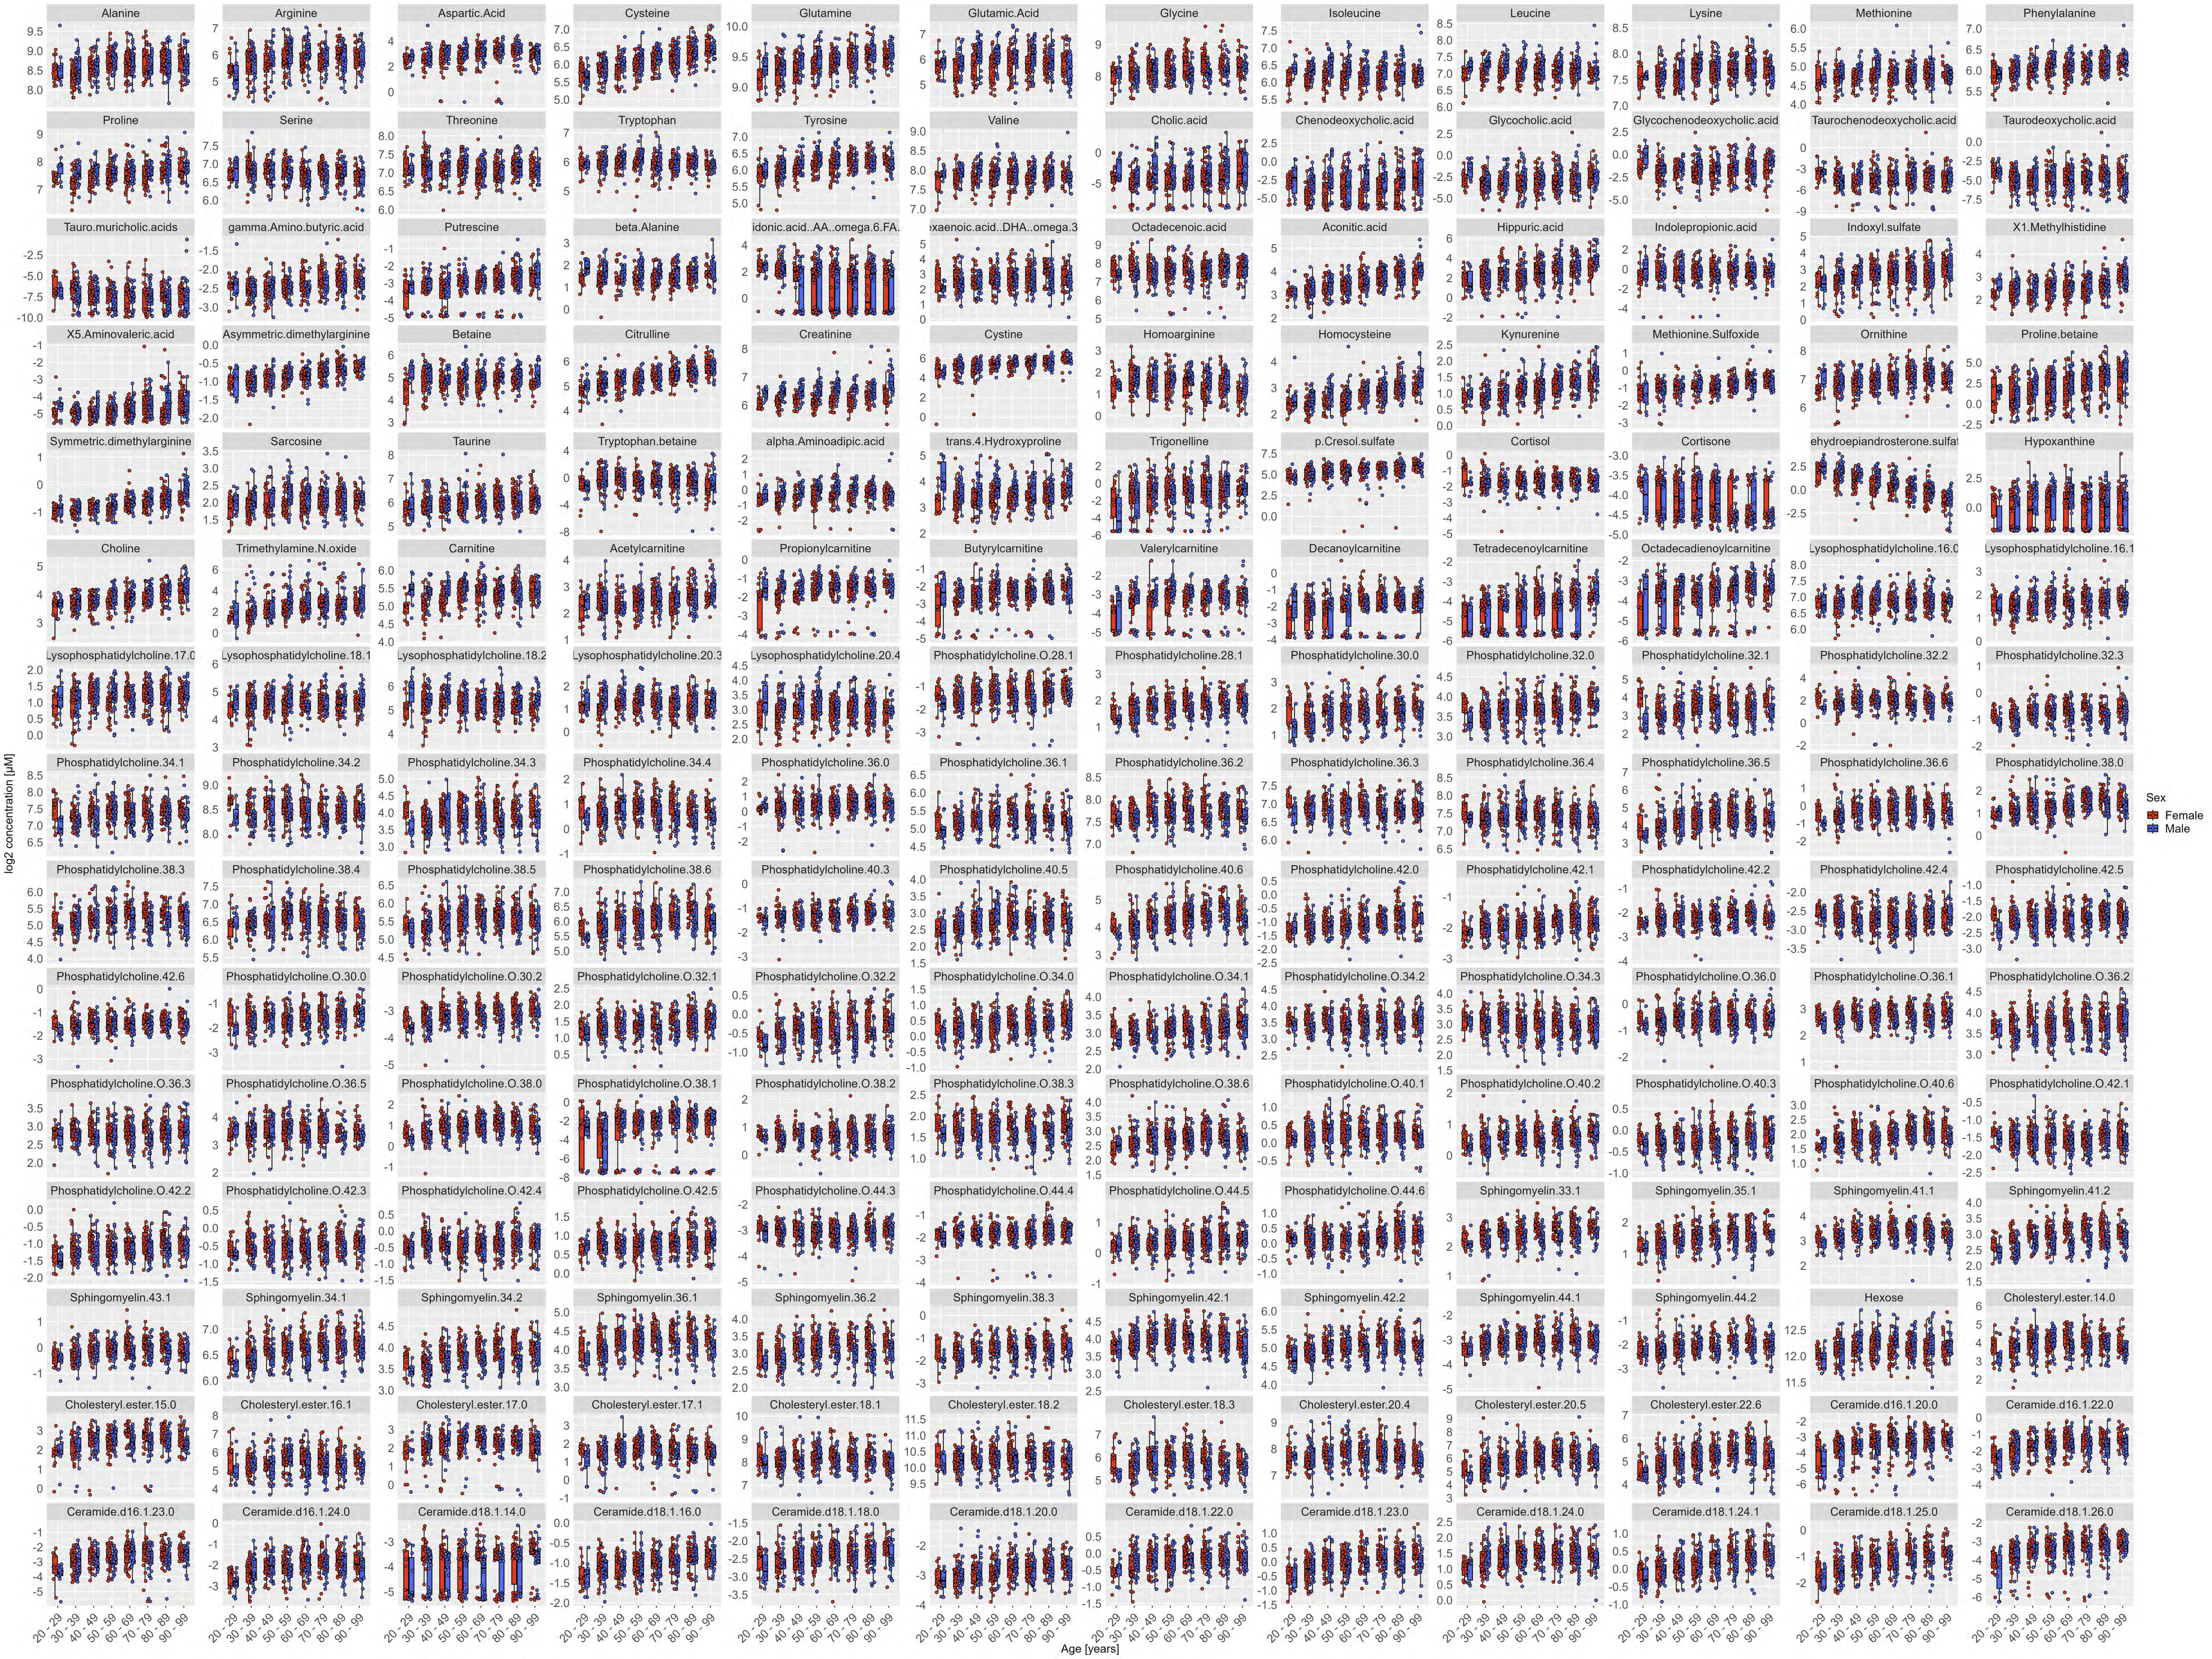

Supplement: s1 [file s1]
